# Supplementary material for: Univariable and Multivariable Two-Sample Mendelian Randomization Investigating the Effects of Leisure Sedentary Behaviors on the Risk of Lung Cancer
Source: Front Genet. 2021 Nov 24;12:742718. doi: 10.3389/fgene.2021.742718 (PMC8651878; doi:10.3389/fgene.2021.742718)
Supplement: Supplementary file 2 [file DataSheet2.xlsx]

## Sheet: Supplementary table 1
Supplementary table 1. Details of each SNPs used in our study.
	SNP	effect_allele.exposure	other_allele.exposure	effect_allele.outcome	other_allele.outcome	beta.exposure	beta.outcome	eaf.exposure	eaf.outcome	remove	palindromic	ambiguous	id.outcome	chr	pos	se.outcome	samplesize.outcome	pval.outcome	outcome	originalname.outcome	outcome.deprecated	mr_keep.outcome	data_source.outcome	proxy.outcome	target_snp.outcome	proxy_snp.outcome	target_a1.outcome	target_a2.outcome	proxy_a1.outcome	proxy_a2.outcome	se.exposure	pval.exposure	gene.exposure	exposure	mr_keep.exposure	mr_keep
1	rs10041724	C	T	C	T	-0.018	-0.0786753	0.192	0.190443	FALSE	FALSE	FALSE	ieu-a-965	5	124273520	0.031978	18336	0.0281022	Lung adenocarcinoma || id:ieu-a-965	Lung adenocarcinoma	Lung adenocarcinoma || ||	TRUE	igd	NA	NA	NA	NA	NA	NA	NA	0.003	3.9e-11	ZNF608	Television	TRUE	TRUE
2	rs10054327	A	G	A	G	-0.017	0.00749484	0.424	0.405479	FALSE	FALSE	TRUE	ieu-a-965	5	147871137	0.028196	18336	0.79456	Lung adenocarcinoma || id:ieu-a-965	Lung adenocarcinoma	Lung adenocarcinoma || ||	TRUE	igd	NA	NA	NA	NA	NA	NA	NA	0.002	3.4e-15	HTR4	Television	TRUE	TRUE
3	rs10145592	G	C	G	C	0.015	-0.0259085	0.591	0.609528	TRUE	TRUE	TRUE	ieu-a-965	14	94287215	0.028655	18336	0.366927	Lung adenocarcinoma || id:ieu-a-965	Lung adenocarcinoma	Lung adenocarcinoma || ||	TRUE	igd	NA	NA	NA	NA	NA	NA	NA	0.002	1.8e-11	PRIMA1	Television	TRUE	FALSE
4	rs10189857	G	A	G	A	0.02	0.0196909	0.432	0.43923	FALSE	FALSE	TRUE	ieu-a-965	2	60713235	0.028313	18336	0.490313	Lung adenocarcinoma || id:ieu-a-965	Lung adenocarcinoma	Lung adenocarcinoma || ||	TRUE	igd	NA	NA	NA	NA	NA	NA	NA	0.002	6.2e-21	BCL11A	Television	TRUE	TRUE
5	rs1031423	C	T	C	T	0.019	-0.0114344	0.785	0.800184	FALSE	FALSE	FALSE	ieu-a-965	5	93276883	0.034821	18336	0.748362	Lung adenocarcinoma || id:ieu-a-965	Lung adenocarcinoma	Lung adenocarcinoma || ||	TRUE	igd	NA	NA	NA	NA	NA	NA	NA	0.003	1.8e-12	FAM172A	Television	TRUE	TRUE
6	rs10737620	A	T	A	T	-0.014	-0.0170803	0.726	0.711765	TRUE	TRUE	TRUE	ieu-a-965	1	193057971	0.031914	18336	0.59787	Lung adenocarcinoma || id:ieu-a-965	Lung adenocarcinoma	Lung adenocarcinoma || ||	TRUE	igd	NA	NA	NA	NA	NA	NA	NA	0.002	2.6e-09	GLRX2	Television	TRUE	FALSE
7	rs10739499	G	C	G	C	-0.014	-0.0174332	0.663	0.668883	TRUE	TRUE	TRUE	ieu-a-965	9	120514261	0.029462	18336	0.55867	Lung adenocarcinoma || id:ieu-a-965	Lung adenocarcinoma	Lung adenocarcinoma || ||	TRUE	igd	NA	NA	NA	NA	NA	NA	NA	0.002	1.5e-09	TLR4	Television	TRUE	FALSE
8	rs10771746	T	C	T	C	0.014	0.0861364	0.283	0.287106	FALSE	FALSE	FALSE	ieu-a-965	12	30791864	0.033034	18336	0.00585302	Lung adenocarcinoma || id:ieu-a-965	Lung adenocarcinoma	Lung adenocarcinoma || ||	TRUE	igd	NA	NA	NA	NA	NA	NA	NA	0.002	2.5e-09	IPO8	Television	TRUE	TRUE
9	rs10772643	T	C	T	C	-0.025	0.0582532	0.892	0.892083	FALSE	FALSE	FALSE	ieu-a-965	12	13415288	0.041669	18336	0.207306	Lung adenocarcinoma || id:ieu-a-965	Lung adenocarcinoma	Lung adenocarcinoma || ||	TRUE	igd	NA	NA	NA	NA	NA	NA	NA	0.003	1.3e-12	EMP1	Television	TRUE	TRUE
10	rs10786658	T	A	T	A	0.014	-0.0378563	0.586	0.61943	TRUE	TRUE	TRUE	ieu-a-965	10	103748333	0.029817	18336	0.200118	Lung adenocarcinoma || id:ieu-a-965	Lung adenocarcinoma	Lung adenocarcinoma || ||	TRUE	igd	TRUE	rs10786658	rs6584467	A	T	G	A	0.002	4.6e-11	C10orf76	Television	TRUE	FALSE
11	rs10876864	A	G	A	G	0.013	-0.000912583	0.573	0.603273	FALSE	FALSE	TRUE	ieu-a-965	12	56401085	0.027781	18336	0.974471	Lung adenocarcinoma || id:ieu-a-965	Lung adenocarcinoma	Lung adenocarcinoma || ||	TRUE	igd	NA	NA	NA	NA	NA	NA	NA	0.002	1e-09	SUOX	Television	TRUE	TRUE
12	rs10932837	T	C	T	C	0.013	0.00748998	0.506	0.503728	FALSE	FALSE	TRUE	ieu-a-965	2	221044785	0.027001	18336	0.788764	Lung adenocarcinoma || id:ieu-a-965	Lung adenocarcinoma	Lung adenocarcinoma || ||	TRUE	igd	NA	NA	NA	NA	NA	NA	NA	0.002	1.3e-09	SLC4A3	Television	TRUE	TRUE
13	rs10947452	C	T	C	T	-0.014	0.0198028	0.651	0.653625	FALSE	FALSE	FALSE	ieu-a-965	6	33803752	0.028477	18336	0.507869	Lung adenocarcinoma || id:ieu-a-965	Lung adenocarcinoma	Lung adenocarcinoma || ||	TRUE	igd	NA	NA	NA	NA	NA	NA	NA	0.002	6.4e-10	MLN	Television	TRUE	TRUE
14	rs11130793	T	C	T	C	-0.013	-0.0207355	0.398	0.385245	FALSE	FALSE	FALSE	ieu-a-965	3	60884659	0.027442	18336	0.471804	Lung adenocarcinoma || id:ieu-a-965	Lung adenocarcinoma	Lung adenocarcinoma || ||	TRUE	igd	NA	NA	NA	NA	NA	NA	NA	0.002	5e-09	FHIT	Television	TRUE	TRUE
15	rs111901094	T	G	T	G	0.017	-0.0569461	0.183	0.115966	FALSE	FALSE	FALSE	ieu-a-965	19	19642795	0.040661	18336	0.205368	Lung adenocarcinoma || id:ieu-a-965	Lung adenocarcinoma	Lung adenocarcinoma || ||	TRUE	igd	TRUE	rs111901094	rs56397647	T	G	T	C	0.003	2e-09	GATAD2A	Television	TRUE	TRUE
16	rs11218575	T	C	T	C	-0.015	-0.0116638	0.434	0.416245	FALSE	FALSE	TRUE	ieu-a-965	11	122154576	0.027818	18336	0.687061	Lung adenocarcinoma || id:ieu-a-965	Lung adenocarcinoma	Lung adenocarcinoma || ||	TRUE	igd	NA	NA	NA	NA	NA	NA	NA	0.002	2.1e-12	MIRLET7A	Television	TRUE	TRUE
17	rs11245482	C	T	C	T	0.013	0.0198507	0.387	0.38193	FALSE	FALSE	FALSE	ieu-a-965	10	126733546	0.028818	18336	0.494634	Lung adenocarcinoma || id:ieu-a-965	Lung adenocarcinoma	Lung adenocarcinoma || ||	TRUE	igd	NA	NA	NA	NA	NA	NA	NA	0.002	2.6e-09	CTBP2	Television	TRUE	TRUE
18	rs114720649	T	C	T	C	0.014	-0.00743759	0.394	0.280232	FALSE	FALSE	FALSE	ieu-a-965	7	77397160	0.036043	18336	0.843458	Lung adenocarcinoma || id:ieu-a-965	Lung adenocarcinoma	Lung adenocarcinoma || ||	TRUE	igd	NA	NA	NA	NA	NA	NA	NA	0.002	1e-09	RSBN1	Television	TRUE	TRUE
19	rs11689199	G	A	G	A	-0.018	-0.0532953	0.402	0.381752	FALSE	FALSE	FALSE	ieu-a-965	2	100820421	0.026885	18336	0.067747	Lung adenocarcinoma || id:ieu-a-965	Lung adenocarcinoma	Lung adenocarcinoma || ||	TRUE	igd	NA	NA	NA	NA	NA	NA	NA	0.002	5.5e-17	AFF3	Television	TRUE	TRUE
20	rs11714337	A	G	A	G	-0.014	0.00555852	0.431	0.431666	FALSE	FALSE	TRUE	ieu-a-965	3	71582521	0.028053	18336	0.846353	Lung adenocarcinoma || id:ieu-a-965	Lung adenocarcinoma	Lung adenocarcinoma || ||	TRUE	igd	NA	NA	NA	NA	NA	NA	NA	0.002	4.7e-11	FOXP1	Television	TRUE	TRUE
21	rs11810109	T	A	T	A	-0.016	0.0243072	0.299	0.29563	TRUE	TRUE	TRUE	ieu-a-965	1	44186812	0.030275	18336	0.424544	Lung adenocarcinoma || id:ieu-a-965	Lung adenocarcinoma	Lung adenocarcinoma || ||	TRUE	igd	NA	NA	NA	NA	NA	NA	NA	0.002	5.4e-12	ST3GAL3	Television	TRUE	FALSE
22	rs11917871	C	T	C	T	0.017	0.00507687	0.575	0.598718	FALSE	FALSE	TRUE	ieu-a-965	3	54233476	0.028245	18336	0.861995	Lung adenocarcinoma || id:ieu-a-965	Lung adenocarcinoma	Lung adenocarcinoma || ||	TRUE	igd	NA	NA	NA	NA	NA	NA	NA	0.002	4.5e-14	CACNA2D3	Television	TRUE	TRUE
23	rs12105701	T	C	T	C	0.013	0.0239219	0.604	0.615522	FALSE	FALSE	FALSE	ieu-a-965	2	41737200	0.027354	18336	0.406425	Lung adenocarcinoma || id:ieu-a-965	Lung adenocarcinoma	Lung adenocarcinoma || ||	TRUE	igd	NA	NA	NA	NA	NA	NA	NA	0.002	5.4e-09	MTA3	Television	TRUE	TRUE
24	rs12342024	T	G	T	G	0.021	0.0190543	0.114	0.116916	FALSE	FALSE	FALSE	ieu-a-965	9	126134232	0.043913	18336	0.672082	Lung adenocarcinoma || id:ieu-a-965	Lung adenocarcinoma	Lung adenocarcinoma || ||	TRUE	igd	NA	NA	NA	NA	NA	NA	NA	0.003	1.7e-09	CRB2	Television	TRUE	TRUE
25	rs1243182	T	C	T	C	0.019	0.0409433	0.31	0.332936	FALSE	FALSE	FALSE	ieu-a-965	10	21916728	0.03018	18336	0.169786	Lung adenocarcinoma || id:ieu-a-965	Lung adenocarcinoma	Lung adenocarcinoma || ||	TRUE	igd	NA	NA	NA	NA	NA	NA	NA	0.002	2e-15	MLLT10	Television	TRUE	TRUE
26	rs12491503	A	G	A	G	0.014	0.0171462	0.33	0.330354	FALSE	FALSE	FALSE	ieu-a-965	3	165706855	0.029243	18336	0.562256	Lung adenocarcinoma || id:ieu-a-965	Lung adenocarcinoma	Lung adenocarcinoma || ||	TRUE	igd	NA	NA	NA	NA	NA	NA	NA	0.002	5.5e-10	BCHE	Television	TRUE	TRUE
27	rs12554512	C	T	C	T	-0.021	0.00982458	0.416	0.392332	FALSE	FALSE	FALSE	ieu-a-965	9	23352293	0.029508	18336	0.744052	Lung adenocarcinoma || id:ieu-a-965	Lung adenocarcinoma	Lung adenocarcinoma || ||	TRUE	igd	NA	NA	NA	NA	NA	NA	NA	0.002	3.8e-21	ELAVL2	Television	TRUE	TRUE
28	rs13107325	T	C	T	C	0.029	0.0240095	0.074	0.0801327	FALSE	FALSE	FALSE	ieu-a-965	4	103188709	0.051285	18336	0.64869	Lung adenocarcinoma || id:ieu-a-965	Lung adenocarcinoma	Lung adenocarcinoma || ||	TRUE	igd	NA	NA	NA	NA	NA	NA	NA	0.004	1.5e-12	SLC39A8	Television	TRUE	TRUE
29	rs1451533	A	G	A	G	0.016	0.00889334	0.275	0.267218	FALSE	FALSE	FALSE	ieu-a-965	2	105466005	0.032047	18336	0.786251	Lung adenocarcinoma || id:ieu-a-965	Lung adenocarcinoma	Lung adenocarcinoma || ||	TRUE	igd	NA	NA	NA	NA	NA	NA	NA	0.002	1.1e-10	POU3F3	Television	TRUE	TRUE
30	rs148544378	T	C	T	C	-0.053	-0.024053	0.021	0.0139171	FALSE	FALSE	FALSE	ieu-a-965	18	40323567	0.125724	18336	0.871246	Lung adenocarcinoma || id:ieu-a-965	Lung adenocarcinoma	Lung adenocarcinoma || ||	TRUE	igd	NA	NA	NA	NA	NA	NA	NA	0.008	2.2e-12	RIT2	Television	TRUE	TRUE
31	rs148648822	T	G	T	G	0.018	-0.056108	0.157	0.139415	FALSE	FALSE	FALSE	ieu-a-965	1	97815048	0.03877	18336	0.189337	Lung adenocarcinoma || id:ieu-a-965	Lung adenocarcinoma	Lung adenocarcinoma || ||	TRUE	igd	NA	NA	NA	NA	NA	NA	NA	0.003	4.2e-09	DPYD	Television	TRUE	TRUE
32	rs17207890	A	G	A	G	-0.016	-0.0772515	0.343	0.334789	FALSE	FALSE	FALSE	ieu-a-965	11	95490754	0.026944	18336	0.00996805	Lung adenocarcinoma || id:ieu-a-965	Lung adenocarcinoma	Lung adenocarcinoma || ||	TRUE	igd	NA	NA	NA	NA	NA	NA	NA	0.002	6.7e-12	CEP57	Television	TRUE	TRUE
33	rs17379561	T	A	T	A	0.025	-0.00496028	0.144	0.152035	TRUE	TRUE	TRUE	ieu-a-965	1	98340139	0.038135	18336	0.900899	Lung adenocarcinoma || id:ieu-a-965	Lung adenocarcinoma	Lung adenocarcinoma || ||	TRUE	igd	NA	NA	NA	NA	NA	NA	NA	0.003	1.1e-16	DPYD	Television	TRUE	FALSE
34	rs17568389	A	T	A	T	-0.015	-0.0469132	0.513	0.499407	TRUE	TRUE	TRUE	ieu-a-965	7	8109522	0.02878	18336	0.0965139	Lung adenocarcinoma || id:ieu-a-965	Lung adenocarcinoma	Lung adenocarcinoma || ||	TRUE	igd	TRUE	rs17568389	rs4725065	A	T	G	A	0.002	8.6e-13	GLCCI1	Television	TRUE	FALSE
35	rs17727474	T	C	T	C	-0.018	-0.0549378	0.168	0.189963	FALSE	FALSE	FALSE	ieu-a-965	10	127182959	0.033741	18336	0.137083	Lung adenocarcinoma || id:ieu-a-965	Lung adenocarcinoma	Lung adenocarcinoma || ||	TRUE	igd	NA	NA	NA	NA	NA	NA	NA	0.003	3.1e-09	TEX36	Television	TRUE	TRUE
36	rs17789218	C	T	C	T	-0.019	0.0172454	0.244	0.23679	FALSE	FALSE	FALSE	ieu-a-965	6	100600097	0.033022	18336	0.607105	Lung adenocarcinoma || id:ieu-a-965	Lung adenocarcinoma	Lung adenocarcinoma || ||	TRUE	igd	NA	NA	NA	NA	NA	NA	NA	0.003	1.4e-13	MCHR2	Television	TRUE	TRUE
37	rs182355396	A	C	A	C	0.08	0.219527	0.008	0.0163429	FALSE	FALSE	FALSE	ieu-a-965	3	50920457	0.156416	18336	0.127807	Lung adenocarcinoma || id:ieu-a-965	Lung adenocarcinoma	Lung adenocarcinoma || ||	TRUE	igd	NA	NA	NA	NA	NA	NA	NA	0.013	2.1e-10	DOCK3	Television	TRUE	TRUE
38	rs1913808	A	G	A	G	-0.015	0.000144989	0.287	0.2998	FALSE	FALSE	FALSE	ieu-a-965	2	162804678	0.029576	18336	0.996199	Lung adenocarcinoma || id:ieu-a-965	Lung adenocarcinoma	Lung adenocarcinoma || ||	TRUE	igd	NA	NA	NA	NA	NA	NA	NA	0.002	3.9e-10	SLC4A10	Television	TRUE	TRUE
39	rs2034768	G	A	G	A	-0.015	-0.0161833	0.513	0.538092	FALSE	FALSE	TRUE	ieu-a-965	3	93986371	0.02805	18336	0.56846	Lung adenocarcinoma || id:ieu-a-965	Lung adenocarcinoma	Lung adenocarcinoma || ||	TRUE	igd	NA	NA	NA	NA	NA	NA	NA	0.002	8.6e-12	NSUN3	Television	TRUE	TRUE
40	rs2045147	G	A	G	A	-0.013	-0.0035487	0.551	0.546813	FALSE	FALSE	TRUE	ieu-a-965	10	56660437	0.027545	18336	0.89988	Lung adenocarcinoma || id:ieu-a-965	Lung adenocarcinoma	Lung adenocarcinoma || ||	TRUE	igd	NA	NA	NA	NA	NA	NA	NA	0.002	5.9e-09	PCDH15	Television	TRUE	TRUE
41	rs2073869	T	C	T	C	-0.019	0.0265806	0.166	0.193672	FALSE	FALSE	FALSE	ieu-a-965	9	135763816	0.035757	18336	0.461104	Lung adenocarcinoma || id:ieu-a-965	Lung adenocarcinoma	Lung adenocarcinoma || ||	TRUE	igd	NA	NA	NA	NA	NA	NA	NA	0.003	1.5e-10	AK8	Television	TRUE	TRUE
42	rs2173650	T	G	T	G	-0.018	-0.0119795	0.148	0.145359	FALSE	FALSE	FALSE	ieu-a-965	12	117525235	0.039171	18336	0.771608	Lung adenocarcinoma || id:ieu-a-965	Lung adenocarcinoma	Lung adenocarcinoma || ||	TRUE	igd	NA	NA	NA	NA	NA	NA	NA	0.003	4.6e-09	TESC	Television	TRUE	TRUE
43	rs2184364	G	A	G	A	-0.016	-0.0610215	0.218	0.225828	FALSE	FALSE	FALSE	ieu-a-965	6	143183596	0.031552	18336	0.0785796	Lung adenocarcinoma || id:ieu-a-965	Lung adenocarcinoma	Lung adenocarcinoma || ||	TRUE	igd	NA	NA	NA	NA	NA	NA	NA	0.003	3e-09	HIVEP2	Television	TRUE	TRUE
44	rs2291681	T	G	T	G	-0.013	0.00335636	0.416	0.407501	FALSE	FALSE	FALSE	ieu-a-965	9	14790841	0.027764	18336	0.906056	Lung adenocarcinoma || id:ieu-a-965	Lung adenocarcinoma	Lung adenocarcinoma || ||	TRUE	igd	NA	NA	NA	NA	NA	NA	NA	0.002	7.9e-09	FREM1	Television	TRUE	TRUE
45	rs2447098	A	C	A	C	0.015	0.00891865	0.525	0.519891	FALSE	FALSE	TRUE	ieu-a-965	17	2277720	0.027663	18336	0.756023	Lung adenocarcinoma || id:ieu-a-965	Lung adenocarcinoma	Lung adenocarcinoma || ||	TRUE	igd	NA	NA	NA	NA	NA	NA	NA	0.002	6.8e-12	MNT	Television	TRUE	TRUE
46	rs2460	A	G	A	G	0.015	-0.0539241	0.264	0.254761	FALSE	FALSE	FALSE	ieu-a-965	15	53073084	0.030545	18336	0.105374	Lung adenocarcinoma || id:ieu-a-965	Lung adenocarcinoma	Lung adenocarcinoma || ||	TRUE	igd	NA	NA	NA	NA	NA	NA	NA	0.002	5e-10	ONECUT1	Television	TRUE	TRUE
47	rs2584597	C	T	C	T	-0.015	0.0175196	0.338	0.283096	FALSE	FALSE	FALSE	ieu-a-965	17	61941284	0.032268	18336	0.592536	Lung adenocarcinoma || id:ieu-a-965	Lung adenocarcinoma	Lung adenocarcinoma || ||	TRUE	igd	NA	NA	NA	NA	NA	NA	NA	0.002	2.9e-10	CSH2	Television	TRUE	TRUE
48	rs2616830	A	G	A	G	-0.016	-0.0147034	0.538	0.556147	FALSE	FALSE	TRUE	ieu-a-965	9	1721385	0.027737	18336	0.60073	Lung adenocarcinoma || id:ieu-a-965	Lung adenocarcinoma	Lung adenocarcinoma || ||	TRUE	igd	NA	NA	NA	NA	NA	NA	NA	0.002	2.9e-14	SMARCA2	Television	TRUE	TRUE
49	rs262890	G	A	G	A	0.019	0.0268941	0.301	0.295801	FALSE	FALSE	FALSE	ieu-a-965	5	62930015	0.03114	18336	0.389476	Lung adenocarcinoma || id:ieu-a-965	Lung adenocarcinoma	Lung adenocarcinoma || ||	TRUE	igd	NA	NA	NA	NA	NA	NA	NA	0.002	3.2e-15	HTR1A	Television	TRUE	TRUE
50	rs263771	A	C	A	C	0.017	0.0204358	0.233	0.22144	FALSE	FALSE	FALSE	ieu-a-965	2	185921692	0.034831	18336	0.562909	Lung adenocarcinoma || id:ieu-a-965	Lung adenocarcinoma	Lung adenocarcinoma || ||	TRUE	igd	NA	NA	NA	NA	NA	NA	NA	0.003	3.1e-11	ZNF804A	Television	TRUE	TRUE
51	rs2971640	A	G	A	G	0.013	0.0366472	0.495	0.513911	FALSE	FALSE	TRUE	ieu-a-965	2	107624618	0.028252	18336	0.190416	Lung adenocarcinoma || id:ieu-a-965	Lung adenocarcinoma	Lung adenocarcinoma || ||	TRUE	igd	NA	NA	NA	NA	NA	NA	NA	0.002	4.2e-09	ST6GAL2	Television	TRUE	TRUE
52	rs303753	A	G	A	G	0.014	0.0039482	0.347	0.346128	FALSE	FALSE	FALSE	ieu-a-965	18	21074922	0.029051	18336	0.894538	Lung adenocarcinoma || id:ieu-a-965	Lung adenocarcinoma	Lung adenocarcinoma || ||	TRUE	igd	NA	NA	NA	NA	NA	NA	NA	0.002	2.7e-10	C18orf8	Television	TRUE	TRUE
53	rs34811474	A	G	A	G	-0.015	0.0132202	0.232	0.210463	FALSE	FALSE	FALSE	ieu-a-965	4	25408838	0.043037	18336	0.765607	Lung adenocarcinoma || id:ieu-a-965	Lung adenocarcinoma	Lung adenocarcinoma || ||	TRUE	igd	NA	NA	NA	NA	NA	NA	NA	0.003	2.3e-09	ANAPC4	Television	TRUE	TRUE
54	rs34864022	G	A	G	A	0.026	-0.00885106	0.066	0.0623068	FALSE	FALSE	FALSE	ieu-a-965	9	22609110	0.05586	18336	0.882154	Lung adenocarcinoma || id:ieu-a-965	Lung adenocarcinoma	Lung adenocarcinoma || ||	TRUE	igd	NA	NA	NA	NA	NA	NA	NA	0.004	1.4e-09	DMRTA1	Television	TRUE	TRUE
55	rs374722	A	G	A	G	-0.024	-0.0108202	0.85	0.854878	FALSE	FALSE	FALSE	ieu-a-965	2	147839830	0.038111	18336	0.782335	Lung adenocarcinoma || id:ieu-a-965	Lung adenocarcinoma	Lung adenocarcinoma || ||	TRUE	igd	NA	NA	NA	NA	NA	NA	NA	0.003	5.5e-16	PABPC1P2	Television	TRUE	TRUE
56	rs3754970	C	T	C	T	0.015	-0.0509877	0.504	0.483653	FALSE	FALSE	TRUE	ieu-a-965	2	162091836	0.029027	18336	0.0721855	Lung adenocarcinoma || id:ieu-a-965	Lung adenocarcinoma	Lung adenocarcinoma || ||	TRUE	igd	NA	NA	NA	NA	NA	NA	NA	0.002	4.8e-12	TANK	Television	TRUE	TRUE
57	rs3796386	A	G	A	G	0.026	0.0362827	0.428	0.418729	FALSE	FALSE	TRUE	ieu-a-965	3	49899795	0.028691	18336	0.202134	Lung adenocarcinoma || id:ieu-a-965	Lung adenocarcinoma	Lung adenocarcinoma || ||	TRUE	igd	NA	NA	NA	NA	NA	NA	NA	0.002	3.2e-33	CAMKV	Television	TRUE	TRUE
58	rs42210	C	G	C	G	0.014	0.00110861	0.711	0.715577	TRUE	TRUE	TRUE	ieu-a-965	5	166408788	0.030275	18336	0.971673	Lung adenocarcinoma || id:ieu-a-965	Lung adenocarcinoma	Lung adenocarcinoma || ||	TRUE	igd	NA	NA	NA	NA	NA	NA	NA	0.002	7.3e-09	TENM2	Television	TRUE	FALSE
59	rs4382592	G	T	G	T	-0.014	-0.0336495	0.699	0.690912	FALSE	FALSE	FALSE	ieu-a-965	9	134870755	0.030372	18336	0.265891	Lung adenocarcinoma || id:ieu-a-965	Lung adenocarcinoma	Lung adenocarcinoma || ||	TRUE	igd	NA	NA	NA	NA	NA	NA	NA	0.002	6.7e-09	MED27	Television	TRUE	TRUE
60	rs4577309	G	A	G	A	-0.016	-0.044741	0.531	0.526533	FALSE	FALSE	TRUE	ieu-a-965	2	191288833	0.028619	18336	0.111692	Lung adenocarcinoma || id:ieu-a-965	Lung adenocarcinoma	Lung adenocarcinoma || ||	TRUE	igd	NA	NA	NA	NA	NA	NA	NA	0.002	1.6e-13	MFSD6	Television	TRUE	TRUE
61	rs4845364	G	A	G	A	0.015	0.0212941	0.505	0.519244	FALSE	FALSE	TRUE	ieu-a-965	1	154141908	0.02685	18336	0.450077	Lung adenocarcinoma || id:ieu-a-965	Lung adenocarcinoma	Lung adenocarcinoma || ||	TRUE	igd	NA	NA	NA	NA	NA	NA	NA	0.002	1.3e-12	TPM3	Television	TRUE	TRUE
62	rs4973576	A	C	A	C	0.015	0.00184771	0.702	0.693102	FALSE	FALSE	FALSE	ieu-a-965	2	233806771	0.030723	18336	0.953578	Lung adenocarcinoma || id:ieu-a-965	Lung adenocarcinoma	Lung adenocarcinoma || ||	TRUE	igd	NA	NA	NA	NA	NA	NA	NA	0.002	1e-09	NGEF	Television	TRUE	TRUE
63	rs553397860	G	A	G	A	-0.017	0.0118831	0.155	0.155772	FALSE	FALSE	FALSE	ieu-a-965	13	99055774	0.038383	18336	0.763032	Lung adenocarcinoma || id:ieu-a-965	Lung adenocarcinoma	Lung adenocarcinoma || ||	TRUE	igd	TRUE	rs553397860	rs9513416	G	A	G	A	0.003	8.9e-09	FARP1	Television	TRUE	TRUE
64	rs56103247	T	C	T	C	-0.03	-0.0914083	0.056	0.0525307	FALSE	FALSE	FALSE	ieu-a-965	20	62483184	0.065361	18336	0.236192	Lung adenocarcinoma || id:ieu-a-965	Lung adenocarcinoma	Lung adenocarcinoma || ||	TRUE	igd	NA	NA	NA	NA	NA	NA	NA	0.005	3.8e-10	ABHD16B	Television	TRUE	TRUE
65	rs56398417	T	C	T	C	-0.014	0.020374	0.313	0.301188	FALSE	FALSE	FALSE	ieu-a-965	3	88024986	0.031498	18336	0.522218	Lung adenocarcinoma || id:ieu-a-965	Lung adenocarcinoma	Lung adenocarcinoma || ||	TRUE	igd	NA	NA	NA	NA	NA	NA	NA	0.002	5.9e-10	HTR1F	Television	TRUE	TRUE
66	rs56858768	A	G	A	G	0.015	0.00570867	0.299	0.284113	FALSE	FALSE	FALSE	ieu-a-965	13	86511730	0.030467	18336	0.854954	Lung adenocarcinoma || id:ieu-a-965	Lung adenocarcinoma	Lung adenocarcinoma || ||	TRUE	igd	NA	NA	NA	NA	NA	NA	NA	0.002	3.4e-10	SLITRK6	Television	TRUE	TRUE
67	rs57585211	G	T	G	T	0.017	0.0434071	0.173	0.160669	FALSE	FALSE	FALSE	ieu-a-965	5	107197725	0.03801	18336	0.250301	Lung adenocarcinoma || id:ieu-a-965	Lung adenocarcinoma	Lung adenocarcinoma || ||	TRUE	igd	NA	NA	NA	NA	NA	NA	NA	0.003	4.3e-09	FBXL17	Television	TRUE	TRUE
68	rs6131281	T	C	T	C	-0.016	0.0273671	0.403	0.404252	FALSE	FALSE	FALSE	ieu-a-965	20	11891724	0.028561	18336	0.338205	Lung adenocarcinoma || id:ieu-a-965	Lung adenocarcinoma	Lung adenocarcinoma || ||	TRUE	igd	NA	NA	NA	NA	NA	NA	NA	0.002	3.1e-13	BTBD3	Television	TRUE	TRUE
69	rs61331678	C	G	C	G	-0.015	0.00476961	0.432	0.424288	TRUE	TRUE	TRUE	ieu-a-965	15	78017272	0.027899	18336	0.867311	Lung adenocarcinoma || id:ieu-a-965	Lung adenocarcinoma	Lung adenocarcinoma || ||	TRUE	igd	TRUE	rs61331678	rs4886901	C	G	A	G	0.002	6.1e-12	LINGO1	Television	TRUE	FALSE
70	rs6141814	A	C	A	C	0.014	0.00560228	0.387	0.376062	FALSE	FALSE	FALSE	ieu-a-965	20	31368960	0.028419	18336	0.847188	Lung adenocarcinoma || id:ieu-a-965	Lung adenocarcinoma	Lung adenocarcinoma || ||	TRUE	igd	NA	NA	NA	NA	NA	NA	NA	0.002	1.3e-09	DNMT3B	Television	TRUE	TRUE
71	rs62332760	T	G	T	G	0.014	-0.00328539	0.387	0.367946	FALSE	FALSE	FALSE	ieu-a-965	4	106135316	0.028351	18336	0.910616	Lung adenocarcinoma || id:ieu-a-965	Lung adenocarcinoma	Lung adenocarcinoma || ||	TRUE	igd	NA	NA	NA	NA	NA	NA	NA	0.002	8e-11	TET2	Television	TRUE	TRUE
72	rs62379379	T	G	T	G	0.026	0.0838226	0.071	0.0807621	FALSE	FALSE	FALSE	ieu-a-965	5	141082015	0.059005	18336	0.143966	Lung adenocarcinoma || id:ieu-a-965	Lung adenocarcinoma	Lung adenocarcinoma || ||	TRUE	igd	NA	NA	NA	NA	NA	NA	NA	0.004	7.8e-10	ARAP3	Television	TRUE	TRUE
73	rs62471080	C	G	C	G	0.013	0.035092	0.459	0.455036	TRUE	TRUE	TRUE	ieu-a-965	7	109132039	0.028544	18336	0.215472	Lung adenocarcinoma || id:ieu-a-965	Lung adenocarcinoma	Lung adenocarcinoma || ||	TRUE	igd	TRUE	rs62471080	rs58683261	C	G	G	T	0.002	3.7e-09	EIF3IP1	Television	TRUE	FALSE
74	rs62641636	G	A	G	A	-0.014	-0.0267126	0.308	0.319293	FALSE	FALSE	FALSE	ieu-a-965	2	68425427	0.030566	18336	0.409679	Lung adenocarcinoma || id:ieu-a-965	Lung adenocarcinoma	Lung adenocarcinoma || ||	TRUE	igd	NA	NA	NA	NA	NA	NA	NA	0.002	7e-10	PPP3R1	Television	TRUE	TRUE
75	rs631130	A	T	A	T	0.014	-0.0162109	0.631	0.635182	TRUE	TRUE	TRUE	ieu-a-965	1	96043010	0.034319	18336	0.642654	Lung adenocarcinoma || id:ieu-a-965	Lung adenocarcinoma	Lung adenocarcinoma || ||	TRUE	igd	NA	NA	NA	NA	NA	NA	NA	0.002	5e-09	RWDD3	Television	TRUE	FALSE
76	rs6472942	C	T	C	T	0.013	-0.010601	0.432	0.436977	FALSE	FALSE	TRUE	ieu-a-965	8	76827190	0.027259	18336	0.708177	Lung adenocarcinoma || id:ieu-a-965	Lung adenocarcinoma	Lung adenocarcinoma || ||	TRUE	igd	NA	NA	NA	NA	NA	NA	NA	0.002	1.8e-09	HNF4G	Television	TRUE	TRUE
77	rs648044	G	A	G	A	0.014	0.0468862	0.605	0.623196	FALSE	FALSE	FALSE	ieu-a-965	11	114030799	0.029857	18336	0.146489	Lung adenocarcinoma || id:ieu-a-965	Lung adenocarcinoma	Lung adenocarcinoma || ||	TRUE	igd	NA	NA	NA	NA	NA	NA	NA	0.002	1e-09	ZBTB16	Television	TRUE	TRUE
78	rs6673341	G	T	G	T	0.015	0.0317497	0.535	0.523019	FALSE	FALSE	TRUE	ieu-a-965	1	184655649	0.026484	18336	0.258474	Lung adenocarcinoma || id:ieu-a-965	Lung adenocarcinoma	Lung adenocarcinoma || ||	TRUE	igd	NA	NA	NA	NA	NA	NA	NA	0.002	2.2e-11	EDEM3	Television	TRUE	TRUE
79	rs66852340	T	C	T	C	0.018	0.0290645	0.224	0.227255	FALSE	FALSE	FALSE	ieu-a-965	4	3311070	0.03409	18336	0.395932	Lung adenocarcinoma || id:ieu-a-965	Lung adenocarcinoma	Lung adenocarcinoma || ||	TRUE	igd	NA	NA	NA	NA	NA	NA	NA	0.003	7.9e-12	RGS12	Television	TRUE	TRUE
80	rs6721975	C	T	C	T	0.017	0.0112217	0.768	0.69245	FALSE	FALSE	FALSE	ieu-a-965	2	5832667	0.034937	18336	0.759247	Lung adenocarcinoma || id:ieu-a-965	Lung adenocarcinoma	Lung adenocarcinoma || ||	TRUE	igd	NA	NA	NA	NA	NA	NA	NA	0.003	1.7e-10	SOX11	Television	TRUE	TRUE
81	rs6797840	C	A	C	A	0.016	0.00235477	0.544	0.539507	FALSE	FALSE	TRUE	ieu-a-965	3	85656569	0.027315	18336	0.933304	Lung adenocarcinoma || id:ieu-a-965	Lung adenocarcinoma	Lung adenocarcinoma || ||	TRUE	igd	NA	NA	NA	NA	NA	NA	NA	0.002	1.7e-13	CADM2	Television	TRUE	TRUE
82	rs6825241	A	C	A	C	0.017	0.0186412	0.464	0.456151	FALSE	FALSE	TRUE	ieu-a-965	4	152543783	0.02783	18336	0.506719	Lung adenocarcinoma || id:ieu-a-965	Lung adenocarcinoma	Lung adenocarcinoma || ||	TRUE	igd	NA	NA	NA	NA	NA	NA	NA	0.002	4.9e-15	FAM160A1	Television	TRUE	TRUE
83	rs6850494	C	A	C	A	0.014	0.041425	0.384	0.397984	FALSE	FALSE	FALSE	ieu-a-965	4	82291771	0.029672	18336	0.157292	Lung adenocarcinoma || id:ieu-a-965	Lung adenocarcinoma	Lung adenocarcinoma || ||	TRUE	igd	NA	NA	NA	NA	NA	NA	NA	0.002	1.1e-10	RASGEF1B	Television	TRUE	TRUE
84	rs6905544	G	A	G	A	0.019	-0.040492	0.601	0.614759	FALSE	FALSE	FALSE	ieu-a-965	6	98411631	0.029362	18336	0.162704	Lung adenocarcinoma || id:ieu-a-965	Lung adenocarcinoma	Lung adenocarcinoma || ||	TRUE	igd	NA	NA	NA	NA	NA	NA	NA	0.002	8.5e-18	MMS22L	Television	TRUE	TRUE
85	rs7043521	T	A	T	A	-0.014	0.00334057	0.569	0.584317	TRUE	TRUE	TRUE	ieu-a-965	9	124605896	0.02753	18336	0.906339	Lung adenocarcinoma || id:ieu-a-965	Lung adenocarcinoma	Lung adenocarcinoma || ||	TRUE	igd	TRUE	rs7043521	rs10760193	A	T	C	T	0.002	6.5e-11	TTLL11	Television	TRUE	FALSE
86	rs7184800	A	G	A	G	-0.017	0.00958096	0.303	0.306726	FALSE	FALSE	FALSE	ieu-a-965	16	53509131	0.029977	18336	0.754131	Lung adenocarcinoma || id:ieu-a-965	Lung adenocarcinoma	Lung adenocarcinoma || ||	TRUE	igd	NA	NA	NA	NA	NA	NA	NA	0.002	8.2e-13	RBL2	Television	TRUE	TRUE
87	rs7189927	C	T	C	T	-0.015	-0.0239392	0.644	0.646119	FALSE	FALSE	FALSE	ieu-a-965	16	28913787	0.029888	18336	0.425638	Lung adenocarcinoma || id:ieu-a-965	Lung adenocarcinoma	Lung adenocarcinoma || ||	TRUE	igd	NA	NA	NA	NA	NA	NA	NA	0.002	3.4e-11	ATP2A1	Television	TRUE	TRUE
88	rs7248205	T	C	T	C	-0.014	0.0024901	0.602	0.566224	FALSE	FALSE	TRUE	ieu-a-965	19	10770305	0.029282	18336	0.934343	Lung adenocarcinoma || id:ieu-a-965	Lung adenocarcinoma	Lung adenocarcinoma || ||	TRUE	igd	NA	NA	NA	NA	NA	NA	NA	0.002	3.4e-10	ILF3	Television	TRUE	TRUE
89	rs72725224	C	A	C	A	0.046	-0.0746395	0.02	0.018516	FALSE	FALSE	FALSE	ieu-a-965	1	188115858	0.093124	18336	0.504124	Lung adenocarcinoma || id:ieu-a-965	Lung adenocarcinoma	Lung adenocarcinoma || ||	TRUE	igd	NA	NA	NA	NA	NA	NA	NA	0.008	3.7e-09	BRINP3	Television	TRUE	TRUE
90	rs72781699	A	G	A	G	0.019	0.0123721	0.203	0.188704	FALSE	FALSE	FALSE	ieu-a-965	2	24277709	0.034699	18336	0.727306	Lung adenocarcinoma || id:ieu-a-965	Lung adenocarcinoma	Lung adenocarcinoma || ||	TRUE	igd	NA	NA	NA	NA	NA	NA	NA	0.003	3e-12	FKBP1B	Television	TRUE	TRUE
91	rs72828890	T	C	T	C	-0.019	-0.0144793	0.131	0.115128	FALSE	FALSE	FALSE	ieu-a-965	5	167806836	0.047011	18336	0.772472	Lung adenocarcinoma || id:ieu-a-965	Lung adenocarcinoma	Lung adenocarcinoma || ||	TRUE	igd	NA	NA	NA	NA	NA	NA	NA	0.003	4.9e-09	WWC1	Television	TRUE	TRUE
92	rs72834698	A	G	A	G	-0.023	-0.0338929	0.142	0.14283	FALSE	FALSE	FALSE	ieu-a-965	6	26176517	0.039753	18336	0.429243	Lung adenocarcinoma || id:ieu-a-965	Lung adenocarcinoma	Lung adenocarcinoma || ||	TRUE	igd	NA	NA	NA	NA	NA	NA	NA	0.003	2.7e-13	HIST1H2BD	Television	TRUE	TRUE
93	rs74802478	A	G	A	G	-0.017	-0.0366121	0.181	0.163082	FALSE	FALSE	FALSE	ieu-a-965	11	131966907	0.035738	18336	0.341446	Lung adenocarcinoma || id:ieu-a-965	Lung adenocarcinoma	Lung adenocarcinoma || ||	TRUE	igd	NA	NA	NA	NA	NA	NA	NA	0.003	3.5e-09	NTM	Television	TRUE	TRUE
94	rs749671	A	G	A	G	-0.016	-0.00476735	0.371	0.380463	FALSE	FALSE	FALSE	ieu-a-965	16	31088347	0.028153	18336	0.869867	Lung adenocarcinoma || id:ieu-a-965	Lung adenocarcinoma	Lung adenocarcinoma || ||	TRUE	igd	NA	NA	NA	NA	NA	NA	NA	0.002	2.7e-12	PRSS53	Television	TRUE	TRUE
95	rs74996610	G	C	G	C	0.031	-0.0306778	0.046	0.0442336	TRUE	TRUE	TRUE	ieu-a-965	12	24075007	0.064443	18336	0.666557	Lung adenocarcinoma || id:ieu-a-965	Lung adenocarcinoma	Lung adenocarcinoma || ||	TRUE	igd	NA	NA	NA	NA	NA	NA	NA	0.005	4.1e-09	SOX5	Television	TRUE	FALSE
96	rs7564130	C	T	C	T	0.015	0.00872582	0.359	0.382492	FALSE	FALSE	FALSE	ieu-a-965	2	50606642	0.028311	18336	0.762432	Lung adenocarcinoma || id:ieu-a-965	Lung adenocarcinoma	Lung adenocarcinoma || ||	TRUE	igd	NA	NA	NA	NA	NA	NA	NA	0.002	2.8e-11	NRXN1	Television	TRUE	TRUE
97	rs7609	T	A	T	A	-0.015	-0.0101434	0.769	0.777271	TRUE	TRUE	TRUE	ieu-a-965	22	29951650	0.032619	18336	0.76106	Lung adenocarcinoma || id:ieu-a-965	Lung adenocarcinoma	Lung adenocarcinoma || ||	TRUE	igd	NA	NA	NA	NA	NA	NA	NA	0.003	3.6e-09	NIPSNAP1	Television	TRUE	FALSE
98	rs7693082	C	G	C	G	-0.015	0.0216936	0.7	0.699771	TRUE	TRUE	TRUE	ieu-a-965	4	159857819	0.029156	18336	0.479827	Lung adenocarcinoma || id:ieu-a-965	Lung adenocarcinoma	Lung adenocarcinoma || ||	TRUE	igd	NA	NA	NA	NA	NA	NA	NA	0.002	1.7e-10	C4orf45	Television	TRUE	FALSE
99	rs7693703	A	G	A	G	-0.023	0.0673296	0.09	0.0941544	FALSE	FALSE	FALSE	ieu-a-965	4	118357405	0.048316	18336	0.154551	Lung adenocarcinoma || id:ieu-a-965	Lung adenocarcinoma	Lung adenocarcinoma || ||	TRUE	igd	NA	NA	NA	NA	NA	NA	NA	0.004	2.7e-09	TRAM1L1	Television	TRUE	TRUE
100	rs7716447	G	A	G	A	0.013	-0.0140188	0.361	0.253969	FALSE	FALSE	FALSE	ieu-a-965	5	88800331	0.036829	18336	0.717783	Lung adenocarcinoma || id:ieu-a-965	Lung adenocarcinoma	Lung adenocarcinoma || ||	TRUE	igd	NA	NA	NA	NA	NA	NA	NA	0.002	3.6e-09	MEF2C	Television	TRUE	TRUE
101	rs7788008	A	G	A	G	-0.013	0.0372698	0.434	0.450017	FALSE	FALSE	TRUE	ieu-a-965	7	112972483	0.028619	18336	0.188548	Lung adenocarcinoma || id:ieu-a-965	Lung adenocarcinoma	Lung adenocarcinoma || ||	TRUE	igd	NA	NA	NA	NA	NA	NA	NA	0.002	5.9e-09	PPP1R3A	Television	TRUE	TRUE
102	rs7834121	T	G	T	G	0.014	0.0373862	0.496	0.496095	FALSE	FALSE	TRUE	ieu-a-965	8	10770311	0.027252	18336	0.198927	Lung adenocarcinoma || id:ieu-a-965	Lung adenocarcinoma	Lung adenocarcinoma || ||	TRUE	igd	TRUE	rs7834121	rs7834248	T	G	T	G	0.002	1.1e-10	XKR6	Television	TRUE	TRUE
103	rs78394231	C	T	C	T	0.021	0.00179838	0.098	0.0971021	FALSE	FALSE	FALSE	ieu-a-965	6	107649123	0.045538	18336	0.969863	Lung adenocarcinoma || id:ieu-a-965	Lung adenocarcinoma	Lung adenocarcinoma || ||	TRUE	igd	NA	NA	NA	NA	NA	NA	NA	0.004	9.7e-09	PDSS2	Television	TRUE	TRUE
104	rs7991062	G	C	G	C	0.018	-0.00795657	0.341	0.344134	TRUE	TRUE	TRUE	ieu-a-965	13	100713194	0.029361	18336	0.794118	Lung adenocarcinoma || id:ieu-a-965	Lung adenocarcinoma	Lung adenocarcinoma || ||	TRUE	igd	NA	NA	NA	NA	NA	NA	NA	0.002	8.8e-15	PCCA	Television	TRUE	FALSE
105	rs801733	C	A	C	A	-0.017	0.0416524	0.359	0.342319	FALSE	FALSE	FALSE	ieu-a-965	11	65934549	0.029752	18336	0.156082	Lung adenocarcinoma || id:ieu-a-965	Lung adenocarcinoma	Lung adenocarcinoma || ||	TRUE	igd	NA	NA	NA	NA	NA	NA	NA	0.002	7.3e-14	PACS1	Television	TRUE	TRUE
106	rs8756	A	C	A	C	0.013	-0.0181601	0.515	0.517069	FALSE	FALSE	TRUE	ieu-a-965	12	66359752	0.027931	18336	0.519515	Lung adenocarcinoma || id:ieu-a-965	Lung adenocarcinoma	Lung adenocarcinoma || ||	TRUE	igd	NA	NA	NA	NA	NA	NA	NA	0.002	5.3e-10	HMGA2	Television	TRUE	TRUE
107	rs9471333	T	C	T	C	-0.013	-0.00717321	0.55	0.562427	FALSE	FALSE	TRUE	ieu-a-965	6	40362023	0.027625	18336	0.799162	Lung adenocarcinoma || id:ieu-a-965	Lung adenocarcinoma	Lung adenocarcinoma || ||	TRUE	igd	NA	NA	NA	NA	NA	NA	NA	0.002	1.5e-09	LRFN2	Television	TRUE	TRUE
108	rs9563168	A	G	A	G	-0.018	0.0403374	0.209	0.205081	FALSE	FALSE	FALSE	ieu-a-965	13	54247827	0.034547	18336	0.239694	Lung adenocarcinoma || id:ieu-a-965	Lung adenocarcinoma	Lung adenocarcinoma || ||	TRUE	igd	NA	NA	NA	NA	NA	NA	NA	0.003	4.3e-11	MIR1297	Television	TRUE	TRUE
109	rs9569734	G	A	G	A	-0.019	-0.0253281	0.156	0.153076	FALSE	FALSE	FALSE	ieu-a-965	13	58319476	0.037079	18336	0.521622	Lung adenocarcinoma || id:ieu-a-965	Lung adenocarcinoma	Lung adenocarcinoma || ||	TRUE	igd	NA	NA	NA	NA	NA	NA	NA	0.003	3.4e-10	PCDH17	Television	TRUE	TRUE
110	rs9834970	C	T	C	T	-0.013	0.0333613	0.499	0.488507	FALSE	FALSE	TRUE	ieu-a-965	3	36856030	0.02808	18336	0.231921	Lung adenocarcinoma || id:ieu-a-965	Lung adenocarcinoma	Lung adenocarcinoma || ||	TRUE	igd	NA	NA	NA	NA	NA	NA	NA	0.002	3.3e-09	TRANK1	Television	TRUE	TRUE
111	rs984409	A	G	A	G	0.015	-0.000623805	0.637	0.652231	FALSE	FALSE	FALSE	ieu-a-965	1	67020440	0.028521	18336	0.98303	Lung adenocarcinoma || id:ieu-a-965	Lung adenocarcinoma	Lung adenocarcinoma || ||	TRUE	igd	NA	NA	NA	NA	NA	NA	NA	0.002	4.1e-11	SGIP1	Television	TRUE	TRUE
112	rs9867121	A	C	A	C	-0.019	0.0220335	0.182	0.188175	FALSE	FALSE	FALSE	ieu-a-965	3	114631548	0.036822	18336	0.555303	Lung adenocarcinoma || id:ieu-a-965	Lung adenocarcinoma	Lung adenocarcinoma || ||	TRUE	igd	NA	NA	NA	NA	NA	NA	NA	0.003	3.9e-12	ZBTB20	Television	TRUE	TRUE
113	rs9902312	C	T	C	T	-0.015	0.0171698	0.317	0.327718	FALSE	FALSE	FALSE	ieu-a-965	17	65070304	0.029178	18336	0.560812	Lung adenocarcinoma || id:ieu-a-965	Lung adenocarcinoma	Lung adenocarcinoma || ||	TRUE	igd	NA	NA	NA	NA	NA	NA	NA	0.002	4.5e-11	HELZ	Television	TRUE	TRUE
114	rs9964724	T	C	T	C	-0.018	-0.000682767	0.682	0.681739	FALSE	FALSE	FALSE	ieu-a-965	18	35159124	0.029214	18336	0.981873	Lung adenocarcinoma || id:ieu-a-965	Lung adenocarcinoma	Lung adenocarcinoma || ||	TRUE	igd	NA	NA	NA	NA	NA	NA	NA	0.002	3.3e-14	CELF4	Television	TRUE	TRUE
115	rs10208088	T	C	T	C	-0.013	-0.00315601	0.581	0.582387	FALSE	FALSE	FALSE	ieu-a-965	2	221055873	0.02756	18336	0.911	Lung adenocarcinoma || id:ieu-a-965	Lung adenocarcinoma	Lung adenocarcinoma || ||	TRUE	igd	NA	NA	NA	NA	NA	NA	NA	0.002	4.4e-09	MIR4268	Computer	TRUE	TRUE
116	rs113851275	A	G	A	G	0.021	0.0822857	0.108	0.122041	FALSE	FALSE	FALSE	ieu-a-965	9	98297220	0.051404	18336	0.097699	Lung adenocarcinoma || id:ieu-a-965	Lung adenocarcinoma	Lung adenocarcinoma || ||	TRUE	igd	NA	NA	NA	NA	NA	NA	NA	0.004	3.2e-09	PTCH1	Computer	TRUE	TRUE
117	rs11708955	C	T	C	T	0.016	-0.0587049	0.305	0.301012	FALSE	FALSE	FALSE	ieu-a-965	3	49540114	0.028326	18336	0.0579495	Lung adenocarcinoma || id:ieu-a-965	Lung adenocarcinoma	Lung adenocarcinoma || ||	TRUE	igd	NA	NA	NA	NA	NA	NA	NA	0.002	4.2e-11	DAG1	Computer	TRUE	TRUE
118	rs11749912	G	A	G	A	-0.014	0.00374902	0.577	0.56671	FALSE	FALSE	TRUE	ieu-a-965	5	88065628	0.027402	18336	0.894478	Lung adenocarcinoma || id:ieu-a-965	Lung adenocarcinoma	Lung adenocarcinoma || ||	TRUE	igd	NA	NA	NA	NA	NA	NA	NA	0.002	4.9e-10	MEF2C	Computer	TRUE	TRUE
119	rs13262595	G	A	G	A	0.016	-0.00681771	0.56	0.559832	FALSE	FALSE	TRUE	ieu-a-965	8	143316970	0.027815	18336	0.81028	Lung adenocarcinoma || id:ieu-a-965	Lung adenocarcinoma	Lung adenocarcinoma || ||	TRUE	igd	NA	NA	NA	NA	NA	NA	NA	0.002	1.2e-12	TSNARE1	Computer	TRUE	TRUE
120	rs1448355	T	C	T	C	0.015	-0.0295462	0.619	0.628283	FALSE	FALSE	FALSE	ieu-a-965	11	131286685	0.029595	18336	0.317759	Lung adenocarcinoma || id:ieu-a-965	Lung adenocarcinoma	Lung adenocarcinoma || ||	TRUE	igd	NA	NA	NA	NA	NA	NA	NA	0.002	1.3e-10	NTM	Computer	TRUE	TRUE
121	rs166835	T	C	T	C	-0.013	-0.000306953	0.557	0.563325	FALSE	FALSE	TRUE	ieu-a-965	15	47716037	0.027433	18336	0.99131	Lung adenocarcinoma || id:ieu-a-965	Lung adenocarcinoma	Lung adenocarcinoma || ||	TRUE	igd	NA	NA	NA	NA	NA	NA	NA	0.002	3.4e-09	SEMA6D	Computer	TRUE	TRUE
122	rs17789218	C	T	C	T	0.015	0.0172454	0.244	0.23679	FALSE	FALSE	FALSE	ieu-a-965	6	100600097	0.033022	18336	0.607105	Lung adenocarcinoma || id:ieu-a-965	Lung adenocarcinoma	Lung adenocarcinoma || ||	TRUE	igd	NA	NA	NA	NA	NA	NA	NA	0.003	4.2e-09	MCHR2	Computer	TRUE	TRUE
123	rs2068625	C	T	C	T	0.016	0.0200578	0.698	0.697629	FALSE	FALSE	FALSE	ieu-a-965	4	159856739	0.029277	18336	0.514646	Lung adenocarcinoma || id:ieu-a-965	Lung adenocarcinoma	Lung adenocarcinoma || ||	TRUE	igd	NA	NA	NA	NA	NA	NA	NA	0.002	4e-11	C4orf45	Computer	TRUE	TRUE
124	rs206965	C	T	C	T	-0.016	-0.0237175	0.793	0.795186	FALSE	FALSE	FALSE	ieu-a-965	12	120856332	0.034134	18336	0.49146	Lung adenocarcinoma || id:ieu-a-965	Lung adenocarcinoma	Lung adenocarcinoma || ||	TRUE	igd	NA	NA	NA	NA	NA	NA	NA	0.003	9.1e-09	COX6A1	Computer	TRUE	TRUE
125	rs2220599	G	C	G	C	0.016	0.00380276	0.367	0.366345	TRUE	TRUE	TRUE	ieu-a-965	5	7378854	0.028111	18336	0.894943	Lung adenocarcinoma || id:ieu-a-965	Lung adenocarcinoma	Lung adenocarcinoma || ||	TRUE	igd	NA	NA	NA	NA	NA	NA	NA	0.002	2.4e-12	ADCY2	Computer	TRUE	FALSE
126	rs2345941	G	A	G	A	-0.015	-0.00759578	0.45	0.464135	FALSE	FALSE	TRUE	ieu-a-965	7	133337635	0.027363	18336	0.788704	Lung adenocarcinoma || id:ieu-a-965	Lung adenocarcinoma	Lung adenocarcinoma || ||	TRUE	igd	NA	NA	NA	NA	NA	NA	NA	0.002	4e-11	EXOC4	Computer	TRUE	TRUE
127	rs2734849	G	A	G	A	0.014	-0.0501844	0.509	0.507771	FALSE	FALSE	TRUE	ieu-a-965	11	113270160	0.028689	18336	0.0735191	Lung adenocarcinoma || id:ieu-a-965	Lung adenocarcinoma	Lung adenocarcinoma || ||	TRUE	igd	NA	NA	NA	NA	NA	NA	NA	0.002	8.2e-10	ANKK1	Computer	TRUE	TRUE
128	rs2748985	C	T	C	T	0.015	-0.00465415	0.545	0.534626	FALSE	FALSE	TRUE	ieu-a-965	1	1853184	0.029412	18336	0.877304	Lung adenocarcinoma || id:ieu-a-965	Lung adenocarcinoma	Lung adenocarcinoma || ||	TRUE	igd	NA	NA	NA	NA	NA	NA	NA	0.002	4.1e-12	CALML6	Computer	TRUE	TRUE
129	rs35933007	A	G	A	G	0.015	-0.0222783	0.228	0.217129	FALSE	FALSE	FALSE	ieu-a-965	12	38929341	0.037498	18336	0.576239	Lung adenocarcinoma || id:ieu-a-965	Lung adenocarcinoma	Lung adenocarcinoma || ||	TRUE	igd	NA	NA	NA	NA	NA	NA	NA	0.003	9.2e-09	CPNE8	Computer	TRUE	TRUE
130	rs4073003	G	A	G	A	-0.02	0.0185548	0.126	0.138268	FALSE	FALSE	FALSE	ieu-a-965	17	19148305	0.042285	18336	0.668258	Lung adenocarcinoma || id:ieu-a-965	Lung adenocarcinoma	Lung adenocarcinoma || ||	TRUE	igd	NA	NA	NA	NA	NA	NA	NA	0.003	1.2e-09	EPN2	Computer	TRUE	TRUE
131	rs4977839	A	G	A	G	0.02	0.0118199	0.416	0.394711	FALSE	FALSE	FALSE	ieu-a-965	9	23355310	0.029478	18336	0.693565	Lung adenocarcinoma || id:ieu-a-965	Lung adenocarcinoma	Lung adenocarcinoma || ||	TRUE	igd	NA	NA	NA	NA	NA	NA	NA	0.002	4.7e-19	ELAVL2	Computer	TRUE	TRUE
132	rs55772938	G	A	G	A	0.015	-0.0112157	0.295	0.301108	FALSE	FALSE	FALSE	ieu-a-965	7	70025113	0.029552	18336	0.715723	Lung adenocarcinoma || id:ieu-a-965	Lung adenocarcinoma	Lung adenocarcinoma || ||	TRUE	igd	NA	NA	NA	NA	NA	NA	NA	0.002	3.9e-10	AUTS2	Computer	TRUE	TRUE
133	rs631130	A	T	A	T	0.013	-0.0162109	0.436	0.635182	TRUE	TRUE	TRUE	ieu-a-965	1	96043010	0.034319	18336	0.642654	Lung adenocarcinoma || id:ieu-a-965	Lung adenocarcinoma	Lung adenocarcinoma || ||	TRUE	igd	NA	NA	NA	NA	NA	NA	NA	0.002	4e-09	CACNA1I	Computer	TRUE	FALSE
134	rs6744254	T	C	T	C	0.016	0.0353288	0.529	0.542309	FALSE	FALSE	TRUE	ieu-a-965	2	155986195	0.02627	18336	0.206497	Lung adenocarcinoma || id:ieu-a-965	Lung adenocarcinoma	Lung adenocarcinoma || ||	TRUE	igd	NA	NA	NA	NA	NA	NA	NA	0.002	5.4e-13	KCNJ3	Computer	TRUE	TRUE
135	rs6774533	T	C	T	C	0.015	-0.038098	0.706	0.687529	FALSE	FALSE	FALSE	ieu-a-965	3	62471086	0.030584	18336	0.208969	Lung adenocarcinoma || id:ieu-a-965	Lung adenocarcinoma	Lung adenocarcinoma || ||	TRUE	igd	NA	NA	NA	NA	NA	NA	NA	0.002	1.2e-09	CADPS	Computer	TRUE	TRUE
136	rs73578186	T	C	T	C	-0.015	-0.00413152	0.325	0.353785	FALSE	FALSE	FALSE	ieu-a-965	9	126334485	0.028497	18336	0.888402	Lung adenocarcinoma || id:ieu-a-965	Lung adenocarcinoma	Lung adenocarcinoma || ||	TRUE	igd	NA	NA	NA	NA	NA	NA	NA	0.002	2.3e-10	DENND1A	Computer	TRUE	TRUE
137	rs9372625	A	G	A	G	0.018	0.0213837	0.381	0.367213	FALSE	FALSE	FALSE	ieu-a-965	6	98344031	0.02967	18336	0.474549	Lung adenocarcinoma || id:ieu-a-965	Lung adenocarcinoma	Lung adenocarcinoma || ||	TRUE	igd	NA	NA	NA	NA	NA	NA	NA	0.002	5.7e-16	MMS22L	Computer	TRUE	TRUE
138	rs984409	A	G	A	G	-0.014	-0.000623805	0.359	0.652231	FALSE	FALSE	TRUE	ieu-a-965	1	67020440	0.028521	18336	0.98303	Lung adenocarcinoma || id:ieu-a-965	Lung adenocarcinoma	Lung adenocarcinoma || ||	TRUE	igd	NA	NA	NA	NA	NA	NA	NA	0.002	9.3e-10	CDH4	Computer	TRUE	TRUE
139	rs10186876	G	A	G	A	-0.014	0.0136619	0.64	0.619064	FALSE	FALSE	FALSE	ieu-a-965	2	44241155	0.028013	18336	0.640115	Lung adenocarcinoma || id:ieu-a-965	Lung adenocarcinoma	Lung adenocarcinoma || ||	TRUE	igd	NA	NA	NA	NA	NA	NA	NA	0.002	7.2e-10	LRPPRC	Driving	TRUE	TRUE
140	rs1198575	C	T	C	T	-0.019	-0.0120007	0.807	0.802189	FALSE	FALSE	FALSE	ieu-a-965	1	98562260	0.035515	18336	0.741344	Lung adenocarcinoma || id:ieu-a-965	Lung adenocarcinoma	Lung adenocarcinoma || ||	TRUE	igd	NA	NA	NA	NA	NA	NA	NA	0.003	2e-11	DPYD	Driving	TRUE	TRUE
141	rs4765541	C	T	C	T	-0.014	-0.0107849	0.336	0.345532	FALSE	FALSE	FALSE	ieu-a-965	12	124465995	0.028104	18336	0.712182	Lung adenocarcinoma || id:ieu-a-965	Lung adenocarcinoma	Lung adenocarcinoma || ||	TRUE	igd	NA	NA	NA	NA	NA	NA	NA	0.002	5.1e-09	CCDC92	Driving	TRUE	TRUE
142	rs6012558	A	G	A	G	-0.014	-0.00919212	0.422	0.414043	FALSE	FALSE	TRUE	ieu-a-965	20	47531286	0.027957	18336	0.751483	Lung adenocarcinoma || id:ieu-a-965	Lung adenocarcinoma	Lung adenocarcinoma || ||	TRUE	igd	NA	NA	NA	NA	NA	NA	NA	0.002	1.6e-10	ARFGEF2	Driving	TRUE	TRUE
143	rs10208088	T	C	T	C	-0.013	0.000868377	0.581	0.583111	FALSE	FALSE	FALSE	ieu-a-966	2	221055873	0.017977	27209	0.962155	Lung cancer || id:ieu-a-966	Lung cancer	Lung cancer || ||	TRUE	igd	NA	NA	NA	NA	NA	NA	NA	0.002	4.4e-09	MIR4268	Computer	TRUE	TRUE
144	rs113851275	A	G	A	G	0.021	0.0399089	0.108	0.121872	FALSE	FALSE	FALSE	ieu-a-966	9	98297220	0.031803	27209	0.20533	Lung cancer || id:ieu-a-966	Lung cancer	Lung cancer || ||	TRUE	igd	NA	NA	NA	NA	NA	NA	NA	0.004	3.2e-09	PTCH1	Computer	TRUE	TRUE
145	rs11708955	C	T	C	T	0.016	-0.059334	0.305	0.302729	FALSE	FALSE	FALSE	ieu-a-966	3	49540114	0.018364	27209	0.002834	Lung cancer || id:ieu-a-966	Lung cancer	Lung cancer || ||	TRUE	igd	NA	NA	NA	NA	NA	NA	NA	0.002	4.2e-11	DAG1	Computer	TRUE	TRUE
146	rs11749912	G	A	G	A	-0.014	-0.00447298	0.577	0.566732	FALSE	FALSE	TRUE	ieu-a-966	5	88065628	0.018041	27209	0.806714	Lung cancer || id:ieu-a-966	Lung cancer	Lung cancer || ||	TRUE	igd	NA	NA	NA	NA	NA	NA	NA	0.002	4.9e-10	MEF2C	Computer	TRUE	TRUE
147	rs13262595	G	A	G	A	0.016	-0.0257291	0.56	0.5591	FALSE	FALSE	TRUE	ieu-a-966	8	143316970	0.018412	27209	0.158974	Lung cancer || id:ieu-a-966	Lung cancer	Lung cancer || ||	TRUE	igd	NA	NA	NA	NA	NA	NA	NA	0.002	1.2e-12	TSNARE1	Computer	TRUE	TRUE
148	rs1448355	T	C	T	C	0.015	-0.0107866	0.619	0.630541	FALSE	FALSE	FALSE	ieu-a-966	11	131286685	0.018934	27209	0.571933	Lung cancer || id:ieu-a-966	Lung cancer	Lung cancer || ||	TRUE	igd	NA	NA	NA	NA	NA	NA	NA	0.002	1.3e-10	NTM	Computer	TRUE	TRUE
149	rs166835	T	C	T	C	-0.013	0.0176722	0.557	0.563811	FALSE	FALSE	TRUE	ieu-a-966	15	47716037	0.017637	27209	0.333529	Lung cancer || id:ieu-a-966	Lung cancer	Lung cancer || ||	TRUE	igd	NA	NA	NA	NA	NA	NA	NA	0.002	3.4e-09	SEMA6D	Computer	TRUE	TRUE
150	rs17789218	C	T	C	T	0.015	-0.0114149	0.244	0.234547	FALSE	FALSE	FALSE	ieu-a-966	6	100600097	0.021144	27209	0.601374	Lung cancer || id:ieu-a-966	Lung cancer	Lung cancer || ||	TRUE	igd	NA	NA	NA	NA	NA	NA	NA	0.003	4.2e-09	MCHR2	Computer	TRUE	TRUE
151	rs2068625	C	T	C	T	0.016	0.00549105	0.698	0.697768	FALSE	FALSE	FALSE	ieu-a-966	4	159856739	0.019446	27209	0.782981	Lung cancer || id:ieu-a-966	Lung cancer	Lung cancer || ||	TRUE	igd	NA	NA	NA	NA	NA	NA	NA	0.002	4e-11	C4orf45	Computer	TRUE	TRUE
152	rs206965	C	T	C	T	-0.016	0.000982482	0.793	0.796861	FALSE	FALSE	FALSE	ieu-a-966	12	120856332	0.021989	27209	0.965151	Lung cancer || id:ieu-a-966	Lung cancer	Lung cancer || ||	TRUE	igd	NA	NA	NA	NA	NA	NA	NA	0.003	9.1e-09	COX6A1	Computer	TRUE	TRUE
153	rs2220599	G	C	G	C	0.016	-0.00263748	0.367	0.365101	TRUE	TRUE	TRUE	ieu-a-966	5	7378854	0.01832	27209	0.88788	Lung cancer || id:ieu-a-966	Lung cancer	Lung cancer || ||	TRUE	igd	NA	NA	NA	NA	NA	NA	NA	0.002	2.4e-12	ADCY2	Computer	TRUE	FALSE
154	rs2345941	G	A	G	A	-0.015	-0.00411747	0.45	0.464484	FALSE	FALSE	TRUE	ieu-a-966	7	133337635	0.017833	27209	0.821271	Lung cancer || id:ieu-a-966	Lung cancer	Lung cancer || ||	TRUE	igd	NA	NA	NA	NA	NA	NA	NA	0.002	4e-11	EXOC4	Computer	TRUE	TRUE
155	rs2734849	G	A	G	A	0.014	-0.0298452	0.509	0.50621	FALSE	FALSE	TRUE	ieu-a-966	11	113270160	0.018262	27209	0.0980483	Lung cancer || id:ieu-a-966	Lung cancer	Lung cancer || ||	TRUE	igd	NA	NA	NA	NA	NA	NA	NA	0.002	8.2e-10	ANKK1	Computer	TRUE	TRUE
156	rs2748985	C	T	C	T	0.015	-0.00127319	0.545	0.535699	FALSE	FALSE	TRUE	ieu-a-966	1	1853184	0.019024	27209	0.947562	Lung cancer || id:ieu-a-966	Lung cancer	Lung cancer || ||	TRUE	igd	NA	NA	NA	NA	NA	NA	NA	0.002	4.1e-12	CALML6	Computer	TRUE	TRUE
157	rs35933007	A	G	A	G	0.015	-0.0153238	0.228	0.217146	FALSE	FALSE	FALSE	ieu-a-966	12	38929341	0.024765	27209	0.552389	Lung cancer || id:ieu-a-966	Lung cancer	Lung cancer || ||	TRUE	igd	NA	NA	NA	NA	NA	NA	NA	0.003	9.2e-09	CPNE8	Computer	TRUE	TRUE
158	rs4073003	G	A	G	A	-0.02	0.000412915	0.126	0.138663	FALSE	FALSE	FALSE	ieu-a-966	17	19148305	0.027111	27209	0.988169	Lung cancer || id:ieu-a-966	Lung cancer	Lung cancer || ||	TRUE	igd	NA	NA	NA	NA	NA	NA	NA	0.003	1.2e-09	EPN2	Computer	TRUE	TRUE
159	rs4977839	A	G	A	G	0.02	-0.00551116	0.416	0.394345	FALSE	FALSE	FALSE	ieu-a-966	9	23355310	0.018864	27209	0.775549	Lung cancer || id:ieu-a-966	Lung cancer	Lung cancer || ||	TRUE	igd	NA	NA	NA	NA	NA	NA	NA	0.002	4.7e-19	ELAVL2	Computer	TRUE	TRUE
160	rs55772938	G	A	G	A	0.015	0.0119869	0.295	0.301277	FALSE	FALSE	FALSE	ieu-a-966	7	70025113	0.019649	27209	0.544802	Lung cancer || id:ieu-a-966	Lung cancer	Lung cancer || ||	TRUE	igd	NA	NA	NA	NA	NA	NA	NA	0.002	3.9e-10	AUTS2	Computer	TRUE	TRUE
161	rs631130	A	T	A	T	0.013	-0.00727051	0.436	0.636657	TRUE	TRUE	TRUE	ieu-a-966	1	96043010	0.022149	27209	0.746328	Lung cancer || id:ieu-a-966	Lung cancer	Lung cancer || ||	TRUE	igd	NA	NA	NA	NA	NA	NA	NA	0.002	4e-09	CACNA1I	Computer	TRUE	FALSE
162	rs6744254	T	C	T	C	0.016	0.0128006	0.529	0.542043	FALSE	FALSE	TRUE	ieu-a-966	2	155986195	0.017553	27209	0.479362	Lung cancer || id:ieu-a-966	Lung cancer	Lung cancer || ||	TRUE	igd	NA	NA	NA	NA	NA	NA	NA	0.002	5.4e-13	KCNJ3	Computer	TRUE	TRUE
163	rs6774533	T	C	T	C	0.015	-0.00116632	0.706	0.688569	FALSE	FALSE	FALSE	ieu-a-966	3	62471086	0.019264	27209	0.952562	Lung cancer || id:ieu-a-966	Lung cancer	Lung cancer || ||	TRUE	igd	NA	NA	NA	NA	NA	NA	NA	0.002	1.2e-09	CADPS	Computer	TRUE	TRUE
164	rs73578186	T	C	T	C	-0.015	-0.0252881	0.325	0.355033	FALSE	FALSE	FALSE	ieu-a-966	9	126334485	0.018136	27209	0.181985	Lung cancer || id:ieu-a-966	Lung cancer	Lung cancer || ||	TRUE	igd	NA	NA	NA	NA	NA	NA	NA	0.002	2.3e-10	DENND1A	Computer	TRUE	TRUE
165	rs9372625	A	G	A	G	0.018	0.0244526	0.381	0.366464	FALSE	FALSE	FALSE	ieu-a-966	6	98344031	0.019444	27209	0.206007	Lung cancer || id:ieu-a-966	Lung cancer	Lung cancer || ||	TRUE	igd	NA	NA	NA	NA	NA	NA	NA	0.002	5.7e-16	MMS22L	Computer	TRUE	TRUE
166	rs984409	A	G	A	G	-0.014	0.00131887	0.359	0.652696	FALSE	FALSE	TRUE	ieu-a-966	1	67020440	0.018621	27209	0.944637	Lung cancer || id:ieu-a-966	Lung cancer	Lung cancer || ||	TRUE	igd	NA	NA	NA	NA	NA	NA	NA	0.002	9.3e-10	CDH4	Computer	TRUE	TRUE
167	rs10041724	C	T	C	T	-0.018	-0.0306015	0.192	0.190055	FALSE	FALSE	FALSE	ieu-a-966	5	124273520	0.02185	27209	0.184114	Lung cancer || id:ieu-a-966	Lung cancer	Lung cancer || ||	TRUE	igd	NA	NA	NA	NA	NA	NA	NA	0.003	3.9e-11	ZNF608	Television	TRUE	TRUE
168	rs10054327	A	G	A	G	-0.017	-0.000889395	0.424	0.405016	FALSE	FALSE	TRUE	ieu-a-966	5	147871137	0.018217	27209	0.961793	Lung cancer || id:ieu-a-966	Lung cancer	Lung cancer || ||	TRUE	igd	NA	NA	NA	NA	NA	NA	NA	0.002	3.4e-15	HTR4	Television	TRUE	TRUE
169	rs10145592	G	C	G	C	0.015	-0.000176984	0.591	0.612343	TRUE	TRUE	TRUE	ieu-a-966	14	94287215	0.01829	27209	0.992432	Lung cancer || id:ieu-a-966	Lung cancer	Lung cancer || ||	TRUE	igd	NA	NA	NA	NA	NA	NA	NA	0.002	1.8e-11	PRIMA1	Television	TRUE	FALSE
170	rs10189857	G	A	G	A	0.02	0.0332413	0.432	0.442042	FALSE	FALSE	TRUE	ieu-a-966	2	60713235	0.018576	27209	0.0691927	Lung cancer || id:ieu-a-966	Lung cancer	Lung cancer || ||	TRUE	igd	NA	NA	NA	NA	NA	NA	NA	0.002	6.2e-21	BCL11A	Television	TRUE	TRUE
171	rs1031423	C	T	C	T	0.019	-0.0254065	0.785	0.802766	FALSE	FALSE	FALSE	ieu-a-966	5	93276883	0.023409	27209	0.276506	Lung cancer || id:ieu-a-966	Lung cancer	Lung cancer || ||	TRUE	igd	NA	NA	NA	NA	NA	NA	NA	0.003	1.8e-12	FAM172A	Television	TRUE	TRUE
172	rs10737620	A	T	A	T	-0.014	0.00955955	0.726	0.710237	TRUE	TRUE	TRUE	ieu-a-966	1	193057971	0.02023	27209	0.646539	Lung cancer || id:ieu-a-966	Lung cancer	Lung cancer || ||	TRUE	igd	NA	NA	NA	NA	NA	NA	NA	0.002	2.6e-09	GLRX2	Television	TRUE	FALSE
173	rs10739499	G	C	G	C	-0.014	-0.0314648	0.663	0.666715	TRUE	TRUE	TRUE	ieu-a-966	9	120514261	0.019411	27209	0.10064	Lung cancer || id:ieu-a-966	Lung cancer	Lung cancer || ||	TRUE	igd	NA	NA	NA	NA	NA	NA	NA	0.002	1.5e-09	TLR4	Television	TRUE	FALSE
174	rs10771746	T	C	T	C	0.014	0.0383405	0.283	0.288529	FALSE	FALSE	FALSE	ieu-a-966	12	30791864	0.020567	27209	0.0575506	Lung cancer || id:ieu-a-966	Lung cancer	Lung cancer || ||	TRUE	igd	NA	NA	NA	NA	NA	NA	NA	0.002	2.5e-09	IPO8	Television	TRUE	TRUE
175	rs10772643	T	C	T	C	-0.025	-0.0108005	0.892	0.889483	FALSE	FALSE	FALSE	ieu-a-966	12	13415288	0.028428	27209	0.7089	Lung cancer || id:ieu-a-966	Lung cancer	Lung cancer || ||	TRUE	igd	NA	NA	NA	NA	NA	NA	NA	0.003	1.3e-12	EMP1	Television	TRUE	TRUE
176	rs10786658	T	A	T	A	0.014	-0.0194496	0.586	0.617513	TRUE	TRUE	TRUE	ieu-a-966	10	103748333	0.019017	27209	0.30597	Lung cancer || id:ieu-a-966	Lung cancer	Lung cancer || ||	TRUE	igd	TRUE	rs10786658	rs6584467	A	T	G	A	0.002	4.6e-11	C10orf76	Television	TRUE	FALSE
177	rs10876864	A	G	A	G	0.013	0.0299325	0.573	0.604439	FALSE	FALSE	TRUE	ieu-a-966	12	56401085	0.017574	27209	0.104478	Lung cancer || id:ieu-a-966	Lung cancer	Lung cancer || ||	TRUE	igd	NA	NA	NA	NA	NA	NA	NA	0.002	1e-09	SUOX	Television	TRUE	TRUE
178	rs10932837	T	C	T	C	0.013	0.00105656	0.506	0.504157	FALSE	FALSE	TRUE	ieu-a-966	2	221044785	0.017776	27209	0.95345	Lung cancer || id:ieu-a-966	Lung cancer	Lung cancer || ||	TRUE	igd	NA	NA	NA	NA	NA	NA	NA	0.002	1.3e-09	SLC4A3	Television	TRUE	TRUE
179	rs10947452	C	T	C	T	-0.014	-0.000719741	0.651	0.653635	FALSE	FALSE	FALSE	ieu-a-966	6	33803752	0.019064	27209	0.970399	Lung cancer || id:ieu-a-966	Lung cancer	Lung cancer || ||	TRUE	igd	NA	NA	NA	NA	NA	NA	NA	0.002	6.4e-10	MLN	Television	TRUE	TRUE
180	rs11130793	T	C	T	C	-0.013	0.000207978	0.398	0.388946	FALSE	FALSE	FALSE	ieu-a-966	3	60884659	0.018231	27209	0.991069	Lung cancer || id:ieu-a-966	Lung cancer	Lung cancer || ||	TRUE	igd	NA	NA	NA	NA	NA	NA	NA	0.002	5e-09	FHIT	Television	TRUE	TRUE
181	rs111901094	T	G	T	G	0.017	-0.0276261	0.183	0.115798	FALSE	FALSE	FALSE	ieu-a-966	19	19642795	0.02748	27209	0.341792	Lung cancer || id:ieu-a-966	Lung cancer	Lung cancer || ||	TRUE	igd	TRUE	rs111901094	rs56397647	T	G	T	C	0.003	2e-09	GATAD2A	Television	TRUE	TRUE
182	rs11218575	T	C	T	C	-0.015	-0.0259703	0.434	0.41427	FALSE	FALSE	TRUE	ieu-a-966	11	122154576	0.017901	27209	0.165134	Lung cancer || id:ieu-a-966	Lung cancer	Lung cancer || ||	TRUE	igd	NA	NA	NA	NA	NA	NA	NA	0.002	2.1e-12	MIRLET7A	Television	TRUE	TRUE
183	rs11245482	C	T	C	T	0.013	0.0178989	0.387	0.38194	FALSE	FALSE	FALSE	ieu-a-966	10	126733546	0.018764	27209	0.340356	Lung cancer || id:ieu-a-966	Lung cancer	Lung cancer || ||	TRUE	igd	NA	NA	NA	NA	NA	NA	NA	0.002	2.6e-09	CTBP2	Television	TRUE	TRUE
184	rs114720649	T	C	T	C	0.014	-0.0187823	0.394	0.279771	FALSE	FALSE	FALSE	ieu-a-966	7	77397160	0.02333	27209	0.440401	Lung cancer || id:ieu-a-966	Lung cancer	Lung cancer || ||	TRUE	igd	NA	NA	NA	NA	NA	NA	NA	0.002	1e-09	RSBN1	Television	TRUE	TRUE
185	rs11689199	G	A	G	A	-0.018	0.00014299	0.402	0.383675	FALSE	FALSE	FALSE	ieu-a-966	2	100820421	0.018373	27209	0.993879	Lung cancer || id:ieu-a-966	Lung cancer	Lung cancer || ||	TRUE	igd	NA	NA	NA	NA	NA	NA	NA	0.002	5.5e-17	AFF3	Television	TRUE	TRUE
186	rs11714337	A	G	A	G	-0.014	0.00147591	0.431	0.430171	FALSE	FALSE	TRUE	ieu-a-966	3	71582521	0.01814	27209	0.936174	Lung cancer || id:ieu-a-966	Lung cancer	Lung cancer || ||	TRUE	igd	NA	NA	NA	NA	NA	NA	NA	0.002	4.7e-11	FOXP1	Television	TRUE	TRUE
187	rs11810109	T	A	T	A	-0.016	-0.0466525	0.299	0.294543	TRUE	TRUE	TRUE	ieu-a-966	1	44186812	0.018541	27209	0.0185178	Lung cancer || id:ieu-a-966	Lung cancer	Lung cancer || ||	TRUE	igd	NA	NA	NA	NA	NA	NA	NA	0.002	5.4e-12	ST3GAL3	Television	TRUE	FALSE
188	rs11917871	C	T	C	T	0.017	-0.00501242	0.575	0.599113	FALSE	FALSE	TRUE	ieu-a-966	3	54233476	0.01868	27209	0.79123	Lung cancer || id:ieu-a-966	Lung cancer	Lung cancer || ||	TRUE	igd	NA	NA	NA	NA	NA	NA	NA	0.002	4.5e-14	CACNA2D3	Television	TRUE	TRUE
189	rs12105701	T	C	T	C	0.013	0.0377891	0.604	0.619143	FALSE	FALSE	FALSE	ieu-a-966	2	41737200	0.017761	27209	0.0442945	Lung cancer || id:ieu-a-966	Lung cancer	Lung cancer || ||	TRUE	igd	NA	NA	NA	NA	NA	NA	NA	0.002	5.4e-09	MTA3	Television	TRUE	TRUE
190	rs12342024	T	G	T	G	0.021	0.0113681	0.114	0.117585	FALSE	FALSE	FALSE	ieu-a-966	9	126134232	0.028073	27209	0.690389	Lung cancer || id:ieu-a-966	Lung cancer	Lung cancer || ||	TRUE	igd	NA	NA	NA	NA	NA	NA	NA	0.003	1.7e-09	CRB2	Television	TRUE	TRUE
191	rs1243182	T	C	T	C	0.019	0.0100929	0.31	0.329431	FALSE	FALSE	FALSE	ieu-a-966	10	21916728	0.019119	27209	0.600797	Lung cancer || id:ieu-a-966	Lung cancer	Lung cancer || ||	TRUE	igd	NA	NA	NA	NA	NA	NA	NA	0.002	2e-15	MLLT10	Television	TRUE	TRUE
192	rs12491503	A	G	A	G	0.014	0.0171491	0.33	0.330589	FALSE	FALSE	FALSE	ieu-a-966	3	165706855	0.019104	27209	0.37008	Lung cancer || id:ieu-a-966	Lung cancer	Lung cancer || ||	TRUE	igd	NA	NA	NA	NA	NA	NA	NA	0.002	5.5e-10	BCHE	Television	TRUE	TRUE
193	rs12554512	C	T	C	T	-0.021	-0.00724015	0.416	0.391967	FALSE	FALSE	FALSE	ieu-a-966	9	23352293	0.018851	27209	0.70829	Lung cancer || id:ieu-a-966	Lung cancer	Lung cancer || ||	TRUE	igd	NA	NA	NA	NA	NA	NA	NA	0.002	3.8e-21	ELAVL2	Television	TRUE	TRUE
194	rs13107325	T	C	T	C	0.029	0.0463357	0.074	0.0788214	FALSE	FALSE	FALSE	ieu-a-966	4	103188709	0.035524	27209	0.186716	Lung cancer || id:ieu-a-966	Lung cancer	Lung cancer || ||	TRUE	igd	NA	NA	NA	NA	NA	NA	NA	0.004	1.5e-12	SLC39A8	Television	TRUE	TRUE
195	rs1451533	A	G	A	G	0.016	0.0208325	0.275	0.269808	FALSE	FALSE	FALSE	ieu-a-966	2	105466005	0.020866	27209	0.317858	Lung cancer || id:ieu-a-966	Lung cancer	Lung cancer || ||	TRUE	igd	NA	NA	NA	NA	NA	NA	NA	0.002	1.1e-10	POU3F3	Television	TRUE	TRUE
196	rs148544378	T	C	T	C	-0.053	-0.0635513	0.021	0.0134577	FALSE	FALSE	FALSE	ieu-a-966	18	40323567	0.080427	27209	0.498211	Lung cancer || id:ieu-a-966	Lung cancer	Lung cancer || ||	TRUE	igd	NA	NA	NA	NA	NA	NA	NA	0.008	2.2e-12	RIT2	Television	TRUE	TRUE
197	rs148648822	T	G	T	G	0.018	-0.00786888	0.157	0.139821	FALSE	FALSE	FALSE	ieu-a-966	1	97815048	0.026267	27209	0.772254	Lung cancer || id:ieu-a-966	Lung cancer	Lung cancer || ||	TRUE	igd	NA	NA	NA	NA	NA	NA	NA	0.003	4.2e-09	DPYD	Television	TRUE	TRUE
198	rs17207890	A	G	A	G	-0.016	-0.050175	0.343	0.333353	FALSE	FALSE	FALSE	ieu-a-966	11	95490754	0.018153	27209	0.00991905	Lung cancer || id:ieu-a-966	Lung cancer	Lung cancer || ||	TRUE	igd	NA	NA	NA	NA	NA	NA	NA	0.002	6.7e-12	CEP57	Television	TRUE	TRUE
199	rs17379561	T	A	T	A	0.025	0.00754447	0.144	0.153763	TRUE	TRUE	TRUE	ieu-a-966	1	98340139	0.024742	27209	0.764348	Lung cancer || id:ieu-a-966	Lung cancer	Lung cancer || ||	TRUE	igd	NA	NA	NA	NA	NA	NA	NA	0.003	1.1e-16	DPYD	Television	TRUE	FALSE
200	rs17568389	A	T	A	T	-0.015	-0.0476629	0.513	0.496433	TRUE	TRUE	TRUE	ieu-a-966	7	8109522	0.018838	27209	0.00916094	Lung cancer || id:ieu-a-966	Lung cancer	Lung cancer || ||	TRUE	igd	TRUE	rs17568389	rs4725065	A	T	G	A	0.002	8.6e-13	GLCCI1	Television	TRUE	FALSE
201	rs17727474	T	C	T	C	-0.018	-0.0325614	0.168	0.190007	FALSE	FALSE	FALSE	ieu-a-966	10	127182959	0.022538	27209	0.171833	Lung cancer || id:ieu-a-966	Lung cancer	Lung cancer || ||	TRUE	igd	NA	NA	NA	NA	NA	NA	NA	0.003	3.1e-09	TEX36	Television	TRUE	TRUE
202	rs17789218	C	T	C	T	-0.019	-0.0114149	0.244	0.234547	FALSE	FALSE	FALSE	ieu-a-966	6	100600097	0.021144	27209	0.601374	Lung cancer || id:ieu-a-966	Lung cancer	Lung cancer || ||	TRUE	igd	NA	NA	NA	NA	NA	NA	NA	0.003	1.4e-13	MCHR2	Television	TRUE	TRUE
203	rs182355396	A	C	A	C	0.08	0.123651	0.008	0.016237	FALSE	FALSE	FALSE	ieu-a-966	3	50920457	0.095264	27209	0.178927	Lung cancer || id:ieu-a-966	Lung cancer	Lung cancer || ||	TRUE	igd	NA	NA	NA	NA	NA	NA	NA	0.013	2.1e-10	DOCK3	Television	TRUE	TRUE
204	rs1913808	A	G	A	G	-0.015	0.00877836	0.287	0.302004	FALSE	FALSE	FALSE	ieu-a-966	2	162804678	0.019421	27209	0.654647	Lung cancer || id:ieu-a-966	Lung cancer	Lung cancer || ||	TRUE	igd	NA	NA	NA	NA	NA	NA	NA	0.002	3.9e-10	SLC4A10	Television	TRUE	TRUE
205	rs2034768	G	A	G	A	-0.015	-0.00413046	0.513	0.537596	FALSE	FALSE	TRUE	ieu-a-966	3	93986371	0.018054	27209	0.821452	Lung cancer || id:ieu-a-966	Lung cancer	Lung cancer || ||	TRUE	igd	NA	NA	NA	NA	NA	NA	NA	0.002	8.6e-12	NSUN3	Television	TRUE	TRUE
206	rs2045147	G	A	G	A	-0.013	-0.0376782	0.551	0.545868	FALSE	FALSE	TRUE	ieu-a-966	10	56660437	0.018607	27209	0.0388884	Lung cancer || id:ieu-a-966	Lung cancer	Lung cancer || ||	TRUE	igd	NA	NA	NA	NA	NA	NA	NA	0.002	5.9e-09	PCDH15	Television	TRUE	TRUE
207	rs2073869	T	C	T	C	-0.019	-0.00346399	0.166	0.194856	FALSE	FALSE	FALSE	ieu-a-966	9	135763816	0.022536	27209	0.880932	Lung cancer || id:ieu-a-966	Lung cancer	Lung cancer || ||	TRUE	igd	NA	NA	NA	NA	NA	NA	NA	0.003	1.5e-10	AK8	Television	TRUE	TRUE
208	rs2173650	T	G	T	G	-0.018	-0.0296018	0.148	0.145454	FALSE	FALSE	FALSE	ieu-a-966	12	117525235	0.025443	27209	0.271193	Lung cancer || id:ieu-a-966	Lung cancer	Lung cancer || ||	TRUE	igd	NA	NA	NA	NA	NA	NA	NA	0.003	4.6e-09	TESC	Television	TRUE	TRUE
209	rs2184364	G	A	G	A	-0.016	-0.0106626	0.218	0.228292	FALSE	FALSE	FALSE	ieu-a-966	6	143183596	0.021407	27209	0.629635	Lung cancer || id:ieu-a-966	Lung cancer	Lung cancer || ||	TRUE	igd	NA	NA	NA	NA	NA	NA	NA	0.003	3e-09	HIVEP2	Television	TRUE	TRUE
210	rs2291681	T	G	T	G	-0.013	-0.00481558	0.416	0.406732	FALSE	FALSE	FALSE	ieu-a-966	9	14790841	0.017979	27209	0.793475	Lung cancer || id:ieu-a-966	Lung cancer	Lung cancer || ||	TRUE	igd	NA	NA	NA	NA	NA	NA	NA	0.002	7.9e-09	FREM1	Television	TRUE	TRUE
211	rs2447098	A	C	A	C	0.015	0.0338484	0.525	0.521952	FALSE	FALSE	TRUE	ieu-a-966	17	2277720	0.017592	27209	0.0677548	Lung cancer || id:ieu-a-966	Lung cancer	Lung cancer || ||	TRUE	igd	NA	NA	NA	NA	NA	NA	NA	0.002	6.8e-12	MNT	Television	TRUE	TRUE
212	rs2460	A	G	A	G	0.015	-0.0513965	0.264	0.254162	FALSE	FALSE	FALSE	ieu-a-966	15	53073084	0.019908	27209	0.0163441	Lung cancer || id:ieu-a-966	Lung cancer	Lung cancer || ||	TRUE	igd	NA	NA	NA	NA	NA	NA	NA	0.002	5e-10	ONECUT1	Television	TRUE	TRUE
213	rs2584597	C	T	C	T	-0.015	-3.30005e-05	0.338	0.282198	FALSE	FALSE	FALSE	ieu-a-966	17	61941284	0.020632	27209	0.998738	Lung cancer || id:ieu-a-966	Lung cancer	Lung cancer || ||	TRUE	igd	NA	NA	NA	NA	NA	NA	NA	0.002	2.9e-10	CSH2	Television	TRUE	TRUE
214	rs2616830	A	G	A	G	-0.016	-0.00338427	0.538	0.556579	FALSE	FALSE	TRUE	ieu-a-966	9	1721385	0.017917	27209	0.852294	Lung cancer || id:ieu-a-966	Lung cancer	Lung cancer || ||	TRUE	igd	NA	NA	NA	NA	NA	NA	NA	0.002	2.9e-14	SMARCA2	Television	TRUE	TRUE
215	rs262890	G	A	G	A	0.019	0.0386244	0.301	0.299911	FALSE	FALSE	FALSE	ieu-a-966	5	62930015	0.020267	27209	0.0520595	Lung cancer || id:ieu-a-966	Lung cancer	Lung cancer || ||	TRUE	igd	NA	NA	NA	NA	NA	NA	NA	0.002	3.2e-15	HTR1A	Television	TRUE	TRUE
216	rs263771	A	C	A	C	0.017	0.0333274	0.233	0.222045	FALSE	FALSE	FALSE	ieu-a-966	2	185921692	0.022621	27209	0.136126	Lung cancer || id:ieu-a-966	Lung cancer	Lung cancer || ||	TRUE	igd	NA	NA	NA	NA	NA	NA	NA	0.003	3.1e-11	ZNF804A	Television	TRUE	TRUE
217	rs2971640	A	G	A	G	0.013	0.0375337	0.495	0.513129	FALSE	FALSE	TRUE	ieu-a-966	2	107624618	0.018421	27209	0.0376808	Lung cancer || id:ieu-a-966	Lung cancer	Lung cancer || ||	TRUE	igd	NA	NA	NA	NA	NA	NA	NA	0.002	4.2e-09	ST6GAL2	Television	TRUE	TRUE
218	rs303753	A	G	A	G	0.014	0.0304535	0.347	0.34587	FALSE	FALSE	FALSE	ieu-a-966	18	21074922	0.019432	27209	0.112817	Lung cancer || id:ieu-a-966	Lung cancer	Lung cancer || ||	TRUE	igd	NA	NA	NA	NA	NA	NA	NA	0.002	2.7e-10	C18orf8	Television	TRUE	TRUE
219	rs34811474	A	G	A	G	-0.015	-0.0424431	0.232	0.209944	FALSE	FALSE	FALSE	ieu-a-966	4	25408838	0.026478	27209	0.13507	Lung cancer || id:ieu-a-966	Lung cancer	Lung cancer || ||	TRUE	igd	NA	NA	NA	NA	NA	NA	NA	0.003	2.3e-09	ANAPC4	Television	TRUE	TRUE
220	rs34864022	G	A	G	A	0.026	0.00251085	0.066	0.0626784	FALSE	FALSE	FALSE	ieu-a-966	9	22609110	0.036849	27209	0.947505	Lung cancer || id:ieu-a-966	Lung cancer	Lung cancer || ||	TRUE	igd	NA	NA	NA	NA	NA	NA	NA	0.004	1.4e-09	DMRTA1	Television	TRUE	TRUE
221	rs374722	A	G	A	G	-0.024	-0.0065654	0.85	0.853864	FALSE	FALSE	FALSE	ieu-a-966	2	147839830	0.024923	27209	0.795869	Lung cancer || id:ieu-a-966	Lung cancer	Lung cancer || ||	TRUE	igd	NA	NA	NA	NA	NA	NA	NA	0.003	5.5e-16	PABPC1P2	Television	TRUE	TRUE
222	rs3754970	C	T	C	T	0.015	-0.00969188	0.504	0.4846	FALSE	FALSE	TRUE	ieu-a-966	2	162091836	0.018051	27209	0.594321	Lung cancer || id:ieu-a-966	Lung cancer	Lung cancer || ||	TRUE	igd	NA	NA	NA	NA	NA	NA	NA	0.002	4.8e-12	TANK	Television	TRUE	TRUE
223	rs3796386	A	G	A	G	0.026	0.0261179	0.428	0.417047	FALSE	FALSE	TRUE	ieu-a-966	3	49899795	0.018534	27209	0.155371	Lung cancer || id:ieu-a-966	Lung cancer	Lung cancer || ||	TRUE	igd	NA	NA	NA	NA	NA	NA	NA	0.002	3.2e-33	CAMKV	Television	TRUE	TRUE
224	rs42210	C	G	C	G	0.014	-0.0110992	0.711	0.714127	TRUE	TRUE	TRUE	ieu-a-966	5	166408788	0.019886	27209	0.579995	Lung cancer || id:ieu-a-966	Lung cancer	Lung cancer || ||	TRUE	igd	NA	NA	NA	NA	NA	NA	NA	0.002	7.3e-09	TENM2	Television	TRUE	FALSE
225	rs4382592	G	T	G	T	-0.014	-0.0451502	0.699	0.691555	FALSE	FALSE	FALSE	ieu-a-966	9	134870755	0.020185	27209	0.021722	Lung cancer || id:ieu-a-966	Lung cancer	Lung cancer || ||	TRUE	igd	NA	NA	NA	NA	NA	NA	NA	0.002	6.7e-09	MED27	Television	TRUE	TRUE
226	rs4577309	G	A	G	A	-0.016	-0.0581651	0.531	0.521966	FALSE	FALSE	TRUE	ieu-a-966	2	191288833	0.018908	27209	0.001366	Lung cancer || id:ieu-a-966	Lung cancer	Lung cancer || ||	TRUE	igd	NA	NA	NA	NA	NA	NA	NA	0.002	1.6e-13	MFSD6	Television	TRUE	TRUE
227	rs4845364	G	A	G	A	0.015	0.0160461	0.505	0.518681	FALSE	FALSE	TRUE	ieu-a-966	1	154141908	0.017592	27209	0.377881	Lung cancer || id:ieu-a-966	Lung cancer	Lung cancer || ||	TRUE	igd	NA	NA	NA	NA	NA	NA	NA	0.002	1.3e-12	TPM3	Television	TRUE	TRUE
228	rs4973576	A	C	A	C	0.015	-0.0153279	0.702	0.693257	FALSE	FALSE	FALSE	ieu-a-966	2	233806771	0.020217	27209	0.450396	Lung cancer || id:ieu-a-966	Lung cancer	Lung cancer || ||	TRUE	igd	NA	NA	NA	NA	NA	NA	NA	0.002	1e-09	NGEF	Television	TRUE	TRUE
229	rs553397860	G	A	G	A	-0.017	0.00396513	0.155	0.154892	FALSE	FALSE	FALSE	ieu-a-966	13	99055774	0.024821	27209	0.875648	Lung cancer || id:ieu-a-966	Lung cancer	Lung cancer || ||	TRUE	igd	TRUE	rs553397860	rs9513416	G	A	G	A	0.003	8.9e-09	FARP1	Television	TRUE	TRUE
230	rs56103247	T	C	T	C	-0.03	-0.043323	0.056	0.0531855	FALSE	FALSE	FALSE	ieu-a-966	20	62483184	0.045001	27209	0.379529	Lung cancer || id:ieu-a-966	Lung cancer	Lung cancer || ||	TRUE	igd	NA	NA	NA	NA	NA	NA	NA	0.005	3.8e-10	ABHD16B	Television	TRUE	TRUE
231	rs56398417	T	C	T	C	-0.014	0.0252642	0.313	0.301033	FALSE	FALSE	FALSE	ieu-a-966	3	88024986	0.020545	27209	0.216353	Lung cancer || id:ieu-a-966	Lung cancer	Lung cancer || ||	TRUE	igd	NA	NA	NA	NA	NA	NA	NA	0.002	5.9e-10	HTR1F	Television	TRUE	TRUE
232	rs56858768	A	G	A	G	0.015	0.0119197	0.299	0.286842	FALSE	FALSE	FALSE	ieu-a-966	13	86511730	0.019925	27209	0.552766	Lung cancer || id:ieu-a-966	Lung cancer	Lung cancer || ||	TRUE	igd	NA	NA	NA	NA	NA	NA	NA	0.002	3.4e-10	SLITRK6	Television	TRUE	TRUE
233	rs57585211	G	T	G	T	0.017	0.0164765	0.173	0.160107	FALSE	FALSE	FALSE	ieu-a-966	5	107197725	0.024479	27209	0.504147	Lung cancer || id:ieu-a-966	Lung cancer	Lung cancer || ||	TRUE	igd	NA	NA	NA	NA	NA	NA	NA	0.003	4.3e-09	FBXL17	Television	TRUE	TRUE
234	rs6131281	T	C	T	C	-0.016	0.0345473	0.403	0.405347	FALSE	FALSE	FALSE	ieu-a-966	20	11891724	0.018685	27209	0.0601326	Lung cancer || id:ieu-a-966	Lung cancer	Lung cancer || ||	TRUE	igd	NA	NA	NA	NA	NA	NA	NA	0.002	3.1e-13	BTBD3	Television	TRUE	TRUE
235	rs61331678	C	G	C	G	-0.015	-0.00148911	0.432	0.423637	TRUE	TRUE	TRUE	ieu-a-966	15	78017272	0.018002	27209	0.935341	Lung cancer || id:ieu-a-966	Lung cancer	Lung cancer || ||	TRUE	igd	TRUE	rs61331678	rs4886901	C	G	A	G	0.002	6.1e-12	LINGO1	Television	TRUE	FALSE
236	rs6141814	A	C	A	C	0.014	0.0249404	0.387	0.377463	FALSE	FALSE	FALSE	ieu-a-966	20	31368960	0.018844	27209	0.182727	Lung cancer || id:ieu-a-966	Lung cancer	Lung cancer || ||	TRUE	igd	NA	NA	NA	NA	NA	NA	NA	0.002	1.3e-09	DNMT3B	Television	TRUE	TRUE
237	rs62332760	T	G	T	G	0.014	-0.0151512	0.387	0.36724	FALSE	FALSE	FALSE	ieu-a-966	4	106135316	0.018241	27209	0.421879	Lung cancer || id:ieu-a-966	Lung cancer	Lung cancer || ||	TRUE	igd	NA	NA	NA	NA	NA	NA	NA	0.002	8e-11	TET2	Television	TRUE	TRUE
238	rs62379379	T	G	T	G	0.026	0.09145	0.071	0.0817743	FALSE	FALSE	FALSE	ieu-a-966	5	141082015	0.037783	27209	0.0104409	Lung cancer || id:ieu-a-966	Lung cancer	Lung cancer || ||	TRUE	igd	NA	NA	NA	NA	NA	NA	NA	0.004	7.8e-10	ARAP3	Television	TRUE	TRUE
239	rs62471080	C	G	C	G	0.013	0.0126664	0.459	0.453737	TRUE	TRUE	TRUE	ieu-a-966	7	109132039	0.018129	27209	0.487005	Lung cancer || id:ieu-a-966	Lung cancer	Lung cancer || ||	TRUE	igd	TRUE	rs62471080	rs58683261	C	G	G	T	0.002	3.7e-09	EIF3IP1	Television	TRUE	FALSE
240	rs62641636	G	A	G	A	-0.014	-0.0289614	0.308	0.321711	FALSE	FALSE	FALSE	ieu-a-966	2	68425427	0.019899	27209	0.165934	Lung cancer || id:ieu-a-966	Lung cancer	Lung cancer || ||	TRUE	igd	NA	NA	NA	NA	NA	NA	NA	0.002	7e-10	PPP3R1	Television	TRUE	TRUE
241	rs631130	A	T	A	T	0.014	-0.00727051	0.631	0.636657	TRUE	TRUE	TRUE	ieu-a-966	1	96043010	0.022149	27209	0.746328	Lung cancer || id:ieu-a-966	Lung cancer	Lung cancer || ||	TRUE	igd	NA	NA	NA	NA	NA	NA	NA	0.002	5e-09	RWDD3	Television	TRUE	FALSE
242	rs6472942	C	T	C	T	0.013	0.0042151	0.432	0.435671	FALSE	FALSE	TRUE	ieu-a-966	8	76827190	0.01817	27209	0.818998	Lung cancer || id:ieu-a-966	Lung cancer	Lung cancer || ||	TRUE	igd	NA	NA	NA	NA	NA	NA	NA	0.002	1.8e-09	HNF4G	Television	TRUE	TRUE
243	rs648044	G	A	G	A	0.014	0.0372783	0.605	0.619445	FALSE	FALSE	FALSE	ieu-a-966	11	114030799	0.01958	27209	0.072272	Lung cancer || id:ieu-a-966	Lung cancer	Lung cancer || ||	TRUE	igd	NA	NA	NA	NA	NA	NA	NA	0.002	1e-09	ZBTB16	Television	TRUE	TRUE
244	rs6673341	G	T	G	T	0.015	0.0184807	0.535	0.523483	FALSE	FALSE	TRUE	ieu-a-966	1	184655649	0.017499	27209	0.308392	Lung cancer || id:ieu-a-966	Lung cancer	Lung cancer || ||	TRUE	igd	NA	NA	NA	NA	NA	NA	NA	0.002	2.2e-11	EDEM3	Television	TRUE	TRUE
245	rs66852340	T	C	T	C	0.018	-0.000339057	0.224	0.227606	FALSE	FALSE	FALSE	ieu-a-966	4	3311070	0.021641	27209	0.987778	Lung cancer || id:ieu-a-966	Lung cancer	Lung cancer || ||	TRUE	igd	NA	NA	NA	NA	NA	NA	NA	0.003	7.9e-12	RGS12	Television	TRUE	TRUE
246	rs6721975	C	T	C	T	0.017	0.0195427	0.768	0.692024	FALSE	FALSE	FALSE	ieu-a-966	2	5832667	0.022453	27209	0.404128	Lung cancer || id:ieu-a-966	Lung cancer	Lung cancer || ||	TRUE	igd	NA	NA	NA	NA	NA	NA	NA	0.003	1.7e-10	SOX11	Television	TRUE	TRUE
247	rs6797840	C	A	C	A	0.016	-0.00406373	0.544	0.538987	FALSE	FALSE	TRUE	ieu-a-966	3	85656569	0.01791	27209	0.822896	Lung cancer || id:ieu-a-966	Lung cancer	Lung cancer || ||	TRUE	igd	NA	NA	NA	NA	NA	NA	NA	0.002	1.7e-13	CADM2	Television	TRUE	TRUE
248	rs6825241	A	C	A	C	0.017	0.0158694	0.464	0.456804	FALSE	FALSE	TRUE	ieu-a-966	4	152543783	0.01816	27209	0.383092	Lung cancer || id:ieu-a-966	Lung cancer	Lung cancer || ||	TRUE	igd	NA	NA	NA	NA	NA	NA	NA	0.002	4.9e-15	FAM160A1	Television	TRUE	TRUE
249	rs6850494	C	A	C	A	0.014	0.0274722	0.384	0.399404	FALSE	FALSE	FALSE	ieu-a-966	4	82291771	0.019037	27209	0.145317	Lung cancer || id:ieu-a-966	Lung cancer	Lung cancer || ||	TRUE	igd	NA	NA	NA	NA	NA	NA	NA	0.002	1.1e-10	RASGEF1B	Television	TRUE	TRUE
250	rs6905544	G	A	G	A	0.019	-0.0268746	0.601	0.616059	FALSE	FALSE	FALSE	ieu-a-966	6	98411631	0.018987	27209	0.153435	Lung cancer || id:ieu-a-966	Lung cancer	Lung cancer || ||	TRUE	igd	NA	NA	NA	NA	NA	NA	NA	0.002	8.5e-18	MMS22L	Television	TRUE	TRUE
251	rs7043521	T	A	T	A	-0.014	-0.0410287	0.569	0.582622	TRUE	TRUE	TRUE	ieu-a-966	9	124605896	0.018759	27209	0.0252238	Lung cancer || id:ieu-a-966	Lung cancer	Lung cancer || ||	TRUE	igd	TRUE	rs7043521	rs10760193	A	T	C	T	0.002	6.5e-11	TTLL11	Television	TRUE	FALSE
252	rs7184800	A	G	A	G	-0.017	0.00680777	0.303	0.304986	FALSE	FALSE	FALSE	ieu-a-966	16	53509131	0.019671	27209	0.732577	Lung cancer || id:ieu-a-966	Lung cancer	Lung cancer || ||	TRUE	igd	NA	NA	NA	NA	NA	NA	NA	0.002	8.2e-13	RBL2	Television	TRUE	TRUE
253	rs7189927	C	T	C	T	-0.015	-0.042865	0.644	0.642414	FALSE	FALSE	FALSE	ieu-a-966	16	28913787	0.019727	27209	0.0260519	Lung cancer || id:ieu-a-966	Lung cancer	Lung cancer || ||	TRUE	igd	NA	NA	NA	NA	NA	NA	NA	0.002	3.4e-11	ATP2A1	Television	TRUE	TRUE
254	rs7248205	T	C	T	C	-0.014	0.018766	0.602	0.569066	FALSE	FALSE	TRUE	ieu-a-966	19	10770305	0.018894	27209	0.338944	Lung cancer || id:ieu-a-966	Lung cancer	Lung cancer || ||	TRUE	igd	NA	NA	NA	NA	NA	NA	NA	0.002	3.4e-10	ILF3	Television	TRUE	TRUE
255	rs72725224	C	A	C	A	0.046	-0.0991907	0.02	0.0181368	FALSE	FALSE	FALSE	ieu-a-966	1	188115858	0.064026	27209	0.192452	Lung cancer || id:ieu-a-966	Lung cancer	Lung cancer || ||	TRUE	igd	NA	NA	NA	NA	NA	NA	NA	0.008	3.7e-09	BRINP3	Television	TRUE	TRUE
256	rs72781699	A	G	A	G	0.019	0.0077876	0.203	0.188136	FALSE	FALSE	FALSE	ieu-a-966	2	24277709	0.022774	27209	0.736168	Lung cancer || id:ieu-a-966	Lung cancer	Lung cancer || ||	TRUE	igd	NA	NA	NA	NA	NA	NA	NA	0.003	3e-12	FKBP1B	Television	TRUE	TRUE
257	rs72828890	T	C	T	C	-0.019	-0.0163194	0.131	0.115254	FALSE	FALSE	FALSE	ieu-a-966	5	167806836	0.030309	27209	0.60757	Lung cancer || id:ieu-a-966	Lung cancer	Lung cancer || ||	TRUE	igd	NA	NA	NA	NA	NA	NA	NA	0.003	4.9e-09	WWC1	Television	TRUE	TRUE
258	rs72834698	A	G	A	G	-0.023	-0.0536118	0.142	0.141686	FALSE	FALSE	FALSE	ieu-a-966	6	26176517	0.025426	27209	0.0517333	Lung cancer || id:ieu-a-966	Lung cancer	Lung cancer || ||	TRUE	igd	NA	NA	NA	NA	NA	NA	NA	0.003	2.7e-13	HIST1H2BD	Television	TRUE	TRUE
259	rs74802478	A	G	A	G	-0.017	-0.0361973	0.181	0.16295	FALSE	FALSE	FALSE	ieu-a-966	11	131966907	0.023396	27209	0.145269	Lung cancer || id:ieu-a-966	Lung cancer	Lung cancer || ||	TRUE	igd	NA	NA	NA	NA	NA	NA	NA	0.003	3.5e-09	NTM	Television	TRUE	TRUE
260	rs749671	A	G	A	G	-0.016	-0.0299068	0.371	0.378876	FALSE	FALSE	FALSE	ieu-a-966	16	31088347	0.018008	27209	0.113572	Lung cancer || id:ieu-a-966	Lung cancer	Lung cancer || ||	TRUE	igd	NA	NA	NA	NA	NA	NA	NA	0.002	2.7e-12	PRSS53	Television	TRUE	TRUE
261	rs74996610	G	C	G	C	0.031	-0.00236981	0.046	0.0445179	TRUE	TRUE	TRUE	ieu-a-966	12	24075007	0.042815	27209	0.957829	Lung cancer || id:ieu-a-966	Lung cancer	Lung cancer || ||	TRUE	igd	NA	NA	NA	NA	NA	NA	NA	0.005	4.1e-09	SOX5	Television	TRUE	FALSE
262	rs7564130	C	T	C	T	0.015	0.0268581	0.359	0.383276	FALSE	FALSE	FALSE	ieu-a-966	2	50606642	0.018693	27209	0.147193	Lung cancer || id:ieu-a-966	Lung cancer	Lung cancer || ||	TRUE	igd	NA	NA	NA	NA	NA	NA	NA	0.002	2.8e-11	NRXN1	Television	TRUE	TRUE
263	rs7609	T	A	T	A	-0.015	0.0016754	0.769	0.778866	TRUE	TRUE	TRUE	ieu-a-966	22	29951650	0.021254	27209	0.938581	Lung cancer || id:ieu-a-966	Lung cancer	Lung cancer || ||	TRUE	igd	NA	NA	NA	NA	NA	NA	NA	0.003	3.6e-09	NIPSNAP1	Television	TRUE	FALSE
264	rs7693082	C	G	C	G	-0.015	0.00750711	0.7	0.699903	TRUE	TRUE	TRUE	ieu-a-966	4	159857819	0.019287	27209	0.704761	Lung cancer || id:ieu-a-966	Lung cancer	Lung cancer || ||	TRUE	igd	NA	NA	NA	NA	NA	NA	NA	0.002	1.7e-10	C4orf45	Television	TRUE	FALSE
265	rs7693703	A	G	A	G	-0.023	0.0304332	0.09	0.0946601	FALSE	FALSE	FALSE	ieu-a-966	4	118357405	0.030734	27209	0.321835	Lung cancer || id:ieu-a-966	Lung cancer	Lung cancer || ||	TRUE	igd	NA	NA	NA	NA	NA	NA	NA	0.004	2.7e-09	TRAM1L1	Television	TRUE	TRUE
266	rs7716447	G	A	G	A	0.013	0.0411554	0.361	0.253033	FALSE	FALSE	FALSE	ieu-a-966	5	88800331	0.025418	27209	0.0996621	Lung cancer || id:ieu-a-966	Lung cancer	Lung cancer || ||	TRUE	igd	NA	NA	NA	NA	NA	NA	NA	0.002	3.6e-09	MEF2C	Television	TRUE	TRUE
267	rs7788008	A	G	A	G	-0.013	0.0226007	0.434	0.448701	FALSE	FALSE	TRUE	ieu-a-966	7	112972483	0.018392	27209	0.216927	Lung cancer || id:ieu-a-966	Lung cancer	Lung cancer || ||	TRUE	igd	NA	NA	NA	NA	NA	NA	NA	0.002	5.9e-09	PPP1R3A	Television	TRUE	TRUE
268	rs7834121	T	G	T	G	0.014	-0.00654553	0.496	0.491649	FALSE	FALSE	TRUE	ieu-a-966	8	10770311	0.018578	27209	0.727708	Lung cancer || id:ieu-a-966	Lung cancer	Lung cancer || ||	TRUE	igd	TRUE	rs7834121	rs7834248	T	G	T	G	0.002	1.1e-10	XKR6	Television	TRUE	TRUE
269	rs78394231	C	T	C	T	0.021	3.89992e-05	0.098	0.0966942	FALSE	FALSE	FALSE	ieu-a-966	6	107649123	0.029855	27209	0.998989	Lung cancer || id:ieu-a-966	Lung cancer	Lung cancer || ||	TRUE	igd	NA	NA	NA	NA	NA	NA	NA	0.004	9.7e-09	PDSS2	Television	TRUE	TRUE
270	rs7991062	G	C	G	C	0.018	0.00431269	0.341	0.343991	TRUE	TRUE	TRUE	ieu-a-966	13	100713194	0.019225	27209	0.825036	Lung cancer || id:ieu-a-966	Lung cancer	Lung cancer || ||	TRUE	igd	NA	NA	NA	NA	NA	NA	NA	0.002	8.8e-15	PCCA	Television	TRUE	FALSE
271	rs801733	C	A	C	A	-0.017	0.0100691	0.359	0.34056	FALSE	FALSE	FALSE	ieu-a-966	11	65934549	0.018965	27209	0.59864	Lung cancer || id:ieu-a-966	Lung cancer	Lung cancer || ||	TRUE	igd	NA	NA	NA	NA	NA	NA	NA	0.002	7.3e-14	PACS1	Television	TRUE	TRUE
272	rs8756	A	C	A	C	0.013	-0.0131146	0.515	0.516407	FALSE	FALSE	TRUE	ieu-a-966	12	66359752	0.018062	27209	0.469854	Lung cancer || id:ieu-a-966	Lung cancer	Lung cancer || ||	TRUE	igd	NA	NA	NA	NA	NA	NA	NA	0.002	5.3e-10	HMGA2	Television	TRUE	TRUE
273	rs9471333	T	C	T	C	-0.013	-0.00693986	0.55	0.558015	FALSE	FALSE	TRUE	ieu-a-966	6	40362023	0.018041	27209	0.703581	Lung cancer || id:ieu-a-966	Lung cancer	Lung cancer || ||	TRUE	igd	NA	NA	NA	NA	NA	NA	NA	0.002	1.5e-09	LRFN2	Television	TRUE	TRUE
274	rs9563168	A	G	A	G	-0.018	0.0165385	0.209	0.205044	FALSE	FALSE	FALSE	ieu-a-966	13	54247827	0.02227	27209	0.460099	Lung cancer || id:ieu-a-966	Lung cancer	Lung cancer || ||	TRUE	igd	NA	NA	NA	NA	NA	NA	NA	0.003	4.3e-11	MIR1297	Television	TRUE	TRUE
275	rs9569734	G	A	G	A	-0.019	-0.0141801	0.156	0.154526	FALSE	FALSE	FALSE	ieu-a-966	13	58319476	0.024397	27209	0.576177	Lung cancer || id:ieu-a-966	Lung cancer	Lung cancer || ||	TRUE	igd	NA	NA	NA	NA	NA	NA	NA	0.003	3.4e-10	PCDH17	Television	TRUE	TRUE
276	rs9834970	C	T	C	T	-0.013	0.0221107	0.499	0.486576	FALSE	FALSE	TRUE	ieu-a-966	3	36856030	0.018226	27209	0.223016	Lung cancer || id:ieu-a-966	Lung cancer	Lung cancer || ||	TRUE	igd	NA	NA	NA	NA	NA	NA	NA	0.002	3.3e-09	TRANK1	Television	TRUE	TRUE
277	rs984409	A	G	A	G	0.015	0.00131887	0.637	0.652696	FALSE	FALSE	FALSE	ieu-a-966	1	67020440	0.018621	27209	0.944637	Lung cancer || id:ieu-a-966	Lung cancer	Lung cancer || ||	TRUE	igd	NA	NA	NA	NA	NA	NA	NA	0.002	4.1e-11	SGIP1	Television	TRUE	TRUE
278	rs9867121	A	C	A	C	-0.019	0.0144304	0.182	0.187106	FALSE	FALSE	FALSE	ieu-a-966	3	114631548	0.024117	27209	0.553336	Lung cancer || id:ieu-a-966	Lung cancer	Lung cancer || ||	TRUE	igd	NA	NA	NA	NA	NA	NA	NA	0.003	3.9e-12	ZBTB20	Television	TRUE	TRUE
279	rs9902312	C	T	C	T	-0.015	0.0176149	0.317	0.328042	FALSE	FALSE	FALSE	ieu-a-966	17	65070304	0.01921	27209	0.359729	Lung cancer || id:ieu-a-966	Lung cancer	Lung cancer || ||	TRUE	igd	NA	NA	NA	NA	NA	NA	NA	0.002	4.5e-11	HELZ	Television	TRUE	TRUE
280	rs9964724	T	C	T	C	-0.018	-0.0232252	0.682	0.681692	FALSE	FALSE	FALSE	ieu-a-966	18	35159124	0.019543	27209	0.232668	Lung cancer || id:ieu-a-966	Lung cancer	Lung cancer || ||	TRUE	igd	NA	NA	NA	NA	NA	NA	NA	0.002	3.3e-14	CELF4	Television	TRUE	TRUE
281	rs10186876	G	A	G	A	-0.014	0.0226537	0.64	0.61949	FALSE	FALSE	FALSE	ieu-a-966	2	44241155	0.018041	27209	0.228105	Lung cancer || id:ieu-a-966	Lung cancer	Lung cancer || ||	TRUE	igd	NA	NA	NA	NA	NA	NA	NA	0.002	7.2e-10	LRPPRC	Driving	TRUE	TRUE
282	rs1198575	C	T	C	T	-0.019	0.00754439	0.807	0.801693	FALSE	FALSE	FALSE	ieu-a-966	1	98562260	0.022612	27209	0.746169	Lung cancer || id:ieu-a-966	Lung cancer	Lung cancer || ||	TRUE	igd	NA	NA	NA	NA	NA	NA	NA	0.003	2e-11	DPYD	Driving	TRUE	TRUE
283	rs4765541	C	T	C	T	-0.014	-0.0136244	0.336	0.344352	FALSE	FALSE	FALSE	ieu-a-966	12	124465995	0.018343	27209	0.472001	Lung cancer || id:ieu-a-966	Lung cancer	Lung cancer || ||	TRUE	igd	NA	NA	NA	NA	NA	NA	NA	0.002	5.1e-09	CCDC92	Driving	TRUE	TRUE
284	rs6012558	A	G	A	G	-0.014	-0.0171177	0.422	0.413374	FALSE	FALSE	TRUE	ieu-a-966	20	47531286	0.018131	27209	0.36218	Lung cancer || id:ieu-a-966	Lung cancer	Lung cancer || ||	TRUE	igd	NA	NA	NA	NA	NA	NA	NA	0.002	1.6e-10	ARFGEF2	Driving	TRUE	TRUE
285	rs10208088	T	C	T	C	-0.013	-0.0393169	0.581	0.582799	FALSE	FALSE	FALSE	ieu-a-967	2	221055873	0.028598	18313	0.16419	Squamous cell lung cancer || id:ieu-a-967	Squamous cell lung cancer	Squamous cell lung cancer || ||	TRUE	igd	NA	NA	NA	NA	NA	NA	NA	0.002	4.4e-09	MIR4268	Computer	TRUE	TRUE
286	rs113851275	A	G	A	G	0.021	-0.008958	0.108	0.121044	FALSE	FALSE	FALSE	ieu-a-967	9	98297220	0.046539	18313	0.855694	Squamous cell lung cancer || id:ieu-a-967	Squamous cell lung cancer	Squamous cell lung cancer || ||	TRUE	igd	NA	NA	NA	NA	NA	NA	NA	0.004	3.2e-09	PTCH1	Computer	TRUE	TRUE
287	rs11708955	C	T	C	T	0.016	-0.0532774	0.305	0.305322	FALSE	FALSE	FALSE	ieu-a-967	3	49540114	0.028289	18313	0.0831285	Squamous cell lung cancer || id:ieu-a-967	Squamous cell lung cancer	Squamous cell lung cancer || ||	TRUE	igd	NA	NA	NA	NA	NA	NA	NA	0.002	4.2e-11	DAG1	Computer	TRUE	TRUE
288	rs11749912	G	A	G	A	-0.014	0.00670644	0.577	0.567809	FALSE	FALSE	TRUE	ieu-a-967	5	88065628	0.027406	18313	0.813082	Squamous cell lung cancer || id:ieu-a-967	Squamous cell lung cancer	Squamous cell lung cancer || ||	TRUE	igd	NA	NA	NA	NA	NA	NA	NA	0.002	4.9e-10	MEF2C	Computer	TRUE	TRUE
289	rs13262595	G	A	G	A	0.016	-0.0104067	0.56	0.561502	FALSE	FALSE	TRUE	ieu-a-967	8	143316970	0.027861	18313	0.713525	Squamous cell lung cancer || id:ieu-a-967	Squamous cell lung cancer	Squamous cell lung cancer || ||	TRUE	igd	NA	NA	NA	NA	NA	NA	NA	0.002	1.2e-12	TSNARE1	Computer	TRUE	TRUE
290	rs1448355	T	C	T	C	0.015	0.0106131	0.619	0.631968	FALSE	FALSE	FALSE	ieu-a-967	11	131286685	0.028609	18313	0.72144	Squamous cell lung cancer || id:ieu-a-967	Squamous cell lung cancer	Squamous cell lung cancer || ||	TRUE	igd	NA	NA	NA	NA	NA	NA	NA	0.002	1.3e-10	NTM	Computer	TRUE	TRUE
291	rs166835	T	C	T	C	-0.013	0.0512743	0.557	0.564891	FALSE	FALSE	TRUE	ieu-a-967	15	47716037	0.02612	18313	0.0696562	Squamous cell lung cancer || id:ieu-a-967	Squamous cell lung cancer	Squamous cell lung cancer || ||	TRUE	igd	NA	NA	NA	NA	NA	NA	NA	0.002	3.4e-09	SEMA6D	Computer	TRUE	TRUE
292	rs17789218	C	T	C	T	0.015	-0.0130174	0.244	0.233791	FALSE	FALSE	FALSE	ieu-a-967	6	100600097	0.03265	18313	0.703484	Squamous cell lung cancer || id:ieu-a-967	Squamous cell lung cancer	Squamous cell lung cancer || ||	TRUE	igd	NA	NA	NA	NA	NA	NA	NA	0.003	4.2e-09	MCHR2	Computer	TRUE	TRUE
293	rs2068625	C	T	C	T	0.016	0.00814609	0.698	0.698251	FALSE	FALSE	FALSE	ieu-a-967	4	159856739	0.029622	18313	0.791241	Squamous cell lung cancer || id:ieu-a-967	Squamous cell lung cancer	Squamous cell lung cancer || ||	TRUE	igd	NA	NA	NA	NA	NA	NA	NA	0.002	4e-11	C4orf45	Computer	TRUE	TRUE
294	rs206965	C	T	C	T	-0.016	-0.0134452	0.793	0.795298	FALSE	FALSE	FALSE	ieu-a-967	12	120856332	0.034301	18313	0.701027	Squamous cell lung cancer || id:ieu-a-967	Squamous cell lung cancer	Squamous cell lung cancer || ||	TRUE	igd	NA	NA	NA	NA	NA	NA	NA	0.003	9.1e-09	COX6A1	Computer	TRUE	TRUE
295	rs2220599	G	C	G	C	0.016	0.00423004	0.367	0.365305	TRUE	TRUE	TRUE	ieu-a-967	5	7378854	0.028302	18313	0.883967	Squamous cell lung cancer || id:ieu-a-967	Squamous cell lung cancer	Squamous cell lung cancer || ||	TRUE	igd	NA	NA	NA	NA	NA	NA	NA	0.002	2.4e-12	ADCY2	Computer	TRUE	FALSE
296	rs2345941	G	A	G	A	-0.015	-0.0168786	0.45	0.463076	FALSE	FALSE	TRUE	ieu-a-967	7	133337635	0.026849	18313	0.547565	Squamous cell lung cancer || id:ieu-a-967	Squamous cell lung cancer	Squamous cell lung cancer || ||	TRUE	igd	NA	NA	NA	NA	NA	NA	NA	0.002	4e-11	EXOC4	Computer	TRUE	TRUE
297	rs2734849	G	A	G	A	0.014	-0.0516755	0.509	0.504847	FALSE	FALSE	TRUE	ieu-a-967	11	113270160	0.028713	18313	0.0651808	Squamous cell lung cancer || id:ieu-a-967	Squamous cell lung cancer	Squamous cell lung cancer || ||	TRUE	igd	NA	NA	NA	NA	NA	NA	NA	0.002	8.2e-10	ANKK1	Computer	TRUE	TRUE
298	rs2748985	C	T	C	T	0.015	0.000114006	0.545	0.536745	FALSE	FALSE	TRUE	ieu-a-967	1	1853184	0.029421	18313	0.996988	Squamous cell lung cancer || id:ieu-a-967	Squamous cell lung cancer	Squamous cell lung cancer || ||	TRUE	igd	NA	NA	NA	NA	NA	NA	NA	0.002	4.1e-12	CALML6	Computer	TRUE	TRUE
299	rs35933007	A	G	A	G	0.015	-0.0473013	0.228	0.216918	FALSE	FALSE	FALSE	ieu-a-967	12	38929341	0.037031	18313	0.241439	Squamous cell lung cancer || id:ieu-a-967	Squamous cell lung cancer	Squamous cell lung cancer || ||	TRUE	igd	NA	NA	NA	NA	NA	NA	NA	0.003	9.2e-09	CPNE8	Computer	TRUE	TRUE
300	rs4073003	G	A	G	A	-0.02	-0.051745	0.126	0.138391	FALSE	FALSE	FALSE	ieu-a-967	17	19148305	0.039596	18313	0.234223	Squamous cell lung cancer || id:ieu-a-967	Squamous cell lung cancer	Squamous cell lung cancer || ||	TRUE	igd	NA	NA	NA	NA	NA	NA	NA	0.003	1.2e-09	EPN2	Computer	TRUE	TRUE
301	rs4977839	A	G	A	G	0.02	-0.00877438	0.416	0.394404	FALSE	FALSE	FALSE	ieu-a-967	9	23355310	0.028951	18313	0.770474	Squamous cell lung cancer || id:ieu-a-967	Squamous cell lung cancer	Squamous cell lung cancer || ||	TRUE	igd	NA	NA	NA	NA	NA	NA	NA	0.002	4.7e-19	ELAVL2	Computer	TRUE	TRUE
302	rs55772938	G	A	G	A	0.015	0.0196614	0.295	0.30192	FALSE	FALSE	FALSE	ieu-a-967	7	70025113	0.030387	18313	0.521912	Squamous cell lung cancer || id:ieu-a-967	Squamous cell lung cancer	Squamous cell lung cancer || ||	TRUE	igd	NA	NA	NA	NA	NA	NA	NA	0.002	3.9e-10	AUTS2	Computer	TRUE	TRUE
303	rs631130	A	T	A	T	0.013	0.0238215	0.436	0.638426	TRUE	TRUE	TRUE	ieu-a-967	1	96043010	0.033184	18313	0.498208	Squamous cell lung cancer || id:ieu-a-967	Squamous cell lung cancer	Squamous cell lung cancer || ||	TRUE	igd	NA	NA	NA	NA	NA	NA	NA	0.002	4e-09	CACNA1I	Computer	TRUE	FALSE
304	rs6744254	T	C	T	C	0.016	-0.00758913	0.529	0.540656	FALSE	FALSE	TRUE	ieu-a-967	2	155986195	0.027367	18313	0.785695	Squamous cell lung cancer || id:ieu-a-967	Squamous cell lung cancer	Squamous cell lung cancer || ||	TRUE	igd	NA	NA	NA	NA	NA	NA	NA	0.002	5.4e-13	KCNJ3	Computer	TRUE	TRUE
305	rs6774533	T	C	T	C	0.015	0.0293536	0.706	0.689267	FALSE	FALSE	FALSE	ieu-a-967	3	62471086	0.028463	18313	0.330833	Squamous cell lung cancer || id:ieu-a-967	Squamous cell lung cancer	Squamous cell lung cancer || ||	TRUE	igd	NA	NA	NA	NA	NA	NA	NA	0.002	1.2e-09	CADPS	Computer	TRUE	TRUE
306	rs73578186	T	C	T	C	-0.015	-0.055684	0.325	0.355386	FALSE	FALSE	FALSE	ieu-a-967	9	126334485	0.026826	18313	0.0563754	Squamous cell lung cancer || id:ieu-a-967	Squamous cell lung cancer	Squamous cell lung cancer || ||	TRUE	igd	NA	NA	NA	NA	NA	NA	NA	0.002	2.3e-10	DENND1A	Computer	TRUE	TRUE
307	rs9372625	A	G	A	G	0.018	0.0131926	0.381	0.36562	FALSE	FALSE	FALSE	ieu-a-967	6	98344031	0.029722	18313	0.662361	Squamous cell lung cancer || id:ieu-a-967	Squamous cell lung cancer	Squamous cell lung cancer || ||	TRUE	igd	NA	NA	NA	NA	NA	NA	NA	0.002	5.7e-16	MMS22L	Computer	TRUE	TRUE
308	rs984409	A	G	A	G	-0.014	-0.0125845	0.359	0.653526	FALSE	FALSE	TRUE	ieu-a-967	1	67020440	0.028829	18313	0.667512	Squamous cell lung cancer || id:ieu-a-967	Squamous cell lung cancer	Squamous cell lung cancer || ||	TRUE	igd	NA	NA	NA	NA	NA	NA	NA	0.002	9.3e-10	CDH4	Computer	TRUE	TRUE
309	rs10041724	C	T	C	T	-0.018	-0.00784368	0.192	0.190215	FALSE	FALSE	FALSE	ieu-a-967	5	124273520	0.03406	18313	0.825309	Squamous cell lung cancer || id:ieu-a-967	Squamous cell lung cancer	Squamous cell lung cancer || ||	TRUE	igd	NA	NA	NA	NA	NA	NA	NA	0.003	3.9e-11	ZNF608	Television	TRUE	TRUE
310	rs10054327	A	G	A	G	-0.017	0.00680976	0.424	0.405126	FALSE	FALSE	TRUE	ieu-a-967	5	147871137	0.028038	18313	0.812021	Squamous cell lung cancer || id:ieu-a-967	Squamous cell lung cancer	Squamous cell lung cancer || ||	TRUE	igd	NA	NA	NA	NA	NA	NA	NA	0.002	3.4e-15	HTR4	Television	TRUE	TRUE
311	rs10145592	G	C	G	C	0.015	-0.0243169	0.591	0.6129	TRUE	TRUE	TRUE	ieu-a-967	14	94290871	0.028901	18313	0.402023	Squamous cell lung cancer || id:ieu-a-967	Squamous cell lung cancer	Squamous cell lung cancer || ||	TRUE	igd	TRUE	rs10145592	rs11160145	C	G	A	G	0.002	1.8e-11	PRIMA1	Television	TRUE	FALSE
312	rs10189857	G	A	G	A	0.02	0.0257808	0.432	0.441986	FALSE	FALSE	TRUE	ieu-a-967	2	60713235	0.028402	18313	0.364992	Squamous cell lung cancer || id:ieu-a-967	Squamous cell lung cancer	Squamous cell lung cancer || ||	TRUE	igd	NA	NA	NA	NA	NA	NA	NA	0.002	6.2e-21	BCL11A	Television	TRUE	TRUE
313	rs1031423	C	T	C	T	0.019	-0.00655845	0.785	0.804925	FALSE	FALSE	FALSE	ieu-a-967	5	93276883	0.03583	18313	0.858898	Squamous cell lung cancer || id:ieu-a-967	Squamous cell lung cancer	Squamous cell lung cancer || ||	TRUE	igd	NA	NA	NA	NA	NA	NA	NA	0.003	1.8e-12	FAM172A	Television	TRUE	TRUE
314	rs10737620	A	T	A	T	-0.014	0.000996496	0.726	0.710478	TRUE	TRUE	TRUE	ieu-a-967	1	193057971	0.03131	18313	0.975403	Squamous cell lung cancer || id:ieu-a-967	Squamous cell lung cancer	Squamous cell lung cancer || ||	TRUE	igd	NA	NA	NA	NA	NA	NA	NA	0.002	2.6e-09	GLRX2	Television	TRUE	FALSE
315	rs10739499	G	C	G	C	-0.014	-0.0188846	0.663	0.665363	TRUE	TRUE	TRUE	ieu-a-967	9	120514261	0.029514	18313	0.526524	Squamous cell lung cancer || id:ieu-a-967	Squamous cell lung cancer	Squamous cell lung cancer || ||	TRUE	igd	NA	NA	NA	NA	NA	NA	NA	0.002	1.5e-09	TLR4	Television	TRUE	FALSE
316	rs10771746	T	C	T	C	0.014	-0.0116223	0.283	0.288352	FALSE	FALSE	FALSE	ieu-a-967	12	30791864	0.030047	18313	0.710773	Squamous cell lung cancer || id:ieu-a-967	Squamous cell lung cancer	Squamous cell lung cancer || ||	TRUE	igd	NA	NA	NA	NA	NA	NA	NA	0.002	2.5e-09	IPO8	Television	TRUE	TRUE
317	rs10772643	T	C	T	C	-0.025	-0.0354839	0.892	0.888895	FALSE	FALSE	FALSE	ieu-a-967	12	13415288	0.044327	18313	0.427117	Squamous cell lung cancer || id:ieu-a-967	Squamous cell lung cancer	Squamous cell lung cancer || ||	TRUE	igd	NA	NA	NA	NA	NA	NA	NA	0.003	1.3e-12	EMP1	Television	TRUE	TRUE
318	rs10786658	T	A	T	A	0.014	0.00977159	0.586	0.618314	TRUE	TRUE	TRUE	ieu-a-967	10	103748333	0.028583	18313	0.742272	Squamous cell lung cancer || id:ieu-a-967	Squamous cell lung cancer	Squamous cell lung cancer || ||	TRUE	igd	TRUE	rs10786658	rs6584467	A	T	G	A	0.002	4.6e-11	C10orf76	Television	TRUE	FALSE
319	rs10876864	A	G	A	G	0.013	0.0187752	0.573	0.602799	FALSE	FALSE	TRUE	ieu-a-967	12	56401085	0.027261	18313	0.510982	Squamous cell lung cancer || id:ieu-a-967	Squamous cell lung cancer	Squamous cell lung cancer || ||	TRUE	igd	NA	NA	NA	NA	NA	NA	NA	0.002	1e-09	SUOX	Television	TRUE	TRUE
320	rs10932837	T	C	T	C	0.013	-0.0284164	0.506	0.503225	FALSE	FALSE	TRUE	ieu-a-967	2	221044785	0.027968	18313	0.309027	Squamous cell lung cancer || id:ieu-a-967	Squamous cell lung cancer	Squamous cell lung cancer || ||	TRUE	igd	NA	NA	NA	NA	NA	NA	NA	0.002	1.3e-09	SLC4A3	Television	TRUE	TRUE
321	rs10947452	C	T	C	T	-0.014	0.00561674	0.651	0.654658	FALSE	FALSE	FALSE	ieu-a-967	6	33803752	0.028981	18313	0.851516	Squamous cell lung cancer || id:ieu-a-967	Squamous cell lung cancer	Squamous cell lung cancer || ||	TRUE	igd	NA	NA	NA	NA	NA	NA	NA	0.002	6.4e-10	MLN	Television	TRUE	TRUE
322	rs11130793	T	C	T	C	-0.013	0.0107154	0.398	0.389681	FALSE	FALSE	FALSE	ieu-a-967	3	60884659	0.028182	18313	0.708614	Squamous cell lung cancer || id:ieu-a-967	Squamous cell lung cancer	Squamous cell lung cancer || ||	TRUE	igd	NA	NA	NA	NA	NA	NA	NA	0.002	5e-09	FHIT	Television	TRUE	TRUE
323	rs111901094	T	G	T	G	0.017	0.0259669	0.183	0.116119	FALSE	FALSE	FALSE	ieu-a-967	19	19642795	0.044088	18313	0.56285	Squamous cell lung cancer || id:ieu-a-967	Squamous cell lung cancer	Squamous cell lung cancer || ||	TRUE	igd	TRUE	rs111901094	rs56397647	T	G	T	C	0.003	2e-09	GATAD2A	Television	TRUE	TRUE
324	rs11218575	T	C	T	C	-0.015	-0.0677576	0.434	0.413409	FALSE	FALSE	TRUE	ieu-a-967	11	122154576	0.026556	18313	0.0205078	Squamous cell lung cancer || id:ieu-a-967	Squamous cell lung cancer	Squamous cell lung cancer || ||	TRUE	igd	NA	NA	NA	NA	NA	NA	NA	0.002	2.1e-12	MIRLET7A	Television	TRUE	TRUE
325	rs11245482	C	T	C	T	0.013	0.0362866	0.387	0.381805	FALSE	FALSE	FALSE	ieu-a-967	10	126733546	0.029177	18313	0.209912	Squamous cell lung cancer || id:ieu-a-967	Squamous cell lung cancer	Squamous cell lung cancer || ||	TRUE	igd	NA	NA	NA	NA	NA	NA	NA	0.002	2.6e-09	CTBP2	Television	TRUE	TRUE
326	rs114720649	T	C	T	C	0.014	-0.0180418	0.394	0.280431	FALSE	FALSE	FALSE	ieu-a-967	7	77397160	0.035885	18313	0.634181	Squamous cell lung cancer || id:ieu-a-967	Squamous cell lung cancer	Squamous cell lung cancer || ||	TRUE	igd	NA	NA	NA	NA	NA	NA	NA	0.002	1e-09	RSBN1	Television	TRUE	TRUE
327	rs11689199	G	A	G	A	-0.018	0.0422929	0.402	0.384968	FALSE	FALSE	FALSE	ieu-a-967	2	100820421	0.029343	18313	0.1438	Squamous cell lung cancer || id:ieu-a-967	Squamous cell lung cancer	Squamous cell lung cancer || ||	TRUE	igd	NA	NA	NA	NA	NA	NA	NA	0.002	5.5e-17	AFF3	Television	TRUE	TRUE
328	rs11714337	A	G	A	G	-0.014	0.0008946	0.431	0.429862	FALSE	FALSE	TRUE	ieu-a-967	3	71582521	0.027943	18313	0.97513	Squamous cell lung cancer || id:ieu-a-967	Squamous cell lung cancer	Squamous cell lung cancer || ||	TRUE	igd	NA	NA	NA	NA	NA	NA	NA	0.002	4.7e-11	FOXP1	Television	TRUE	TRUE
329	rs11810109	T	A	T	A	-0.016	-0.081529	0.299	0.294303	TRUE	TRUE	TRUE	ieu-a-967	1	44186812	0.027431	18313	0.00786104	Squamous cell lung cancer || id:ieu-a-967	Squamous cell lung cancer	Squamous cell lung cancer || ||	TRUE	igd	NA	NA	NA	NA	NA	NA	NA	0.002	5.4e-12	ST3GAL3	Television	TRUE	FALSE
330	rs11917871	C	T	C	T	0.017	-0.00718215	0.575	0.599929	FALSE	FALSE	TRUE	ieu-a-967	3	54233476	0.028798	18313	0.807168	Squamous cell lung cancer || id:ieu-a-967	Squamous cell lung cancer	Squamous cell lung cancer || ||	TRUE	igd	NA	NA	NA	NA	NA	NA	NA	0.002	4.5e-14	CACNA2D3	Television	TRUE	TRUE
331	rs12105701	T	C	T	C	0.013	0.0381049	0.604	0.618268	FALSE	FALSE	FALSE	ieu-a-967	2	41737200	0.027247	18313	0.190671	Squamous cell lung cancer || id:ieu-a-967	Squamous cell lung cancer	Squamous cell lung cancer || ||	TRUE	igd	NA	NA	NA	NA	NA	NA	NA	0.002	5.4e-09	MTA3	Television	TRUE	TRUE
332	rs12342024	T	G	T	G	0.021	-0.00329743	0.114	0.117718	FALSE	FALSE	FALSE	ieu-a-967	9	126134232	0.041401	18313	0.939313	Squamous cell lung cancer || id:ieu-a-967	Squamous cell lung cancer	Squamous cell lung cancer || ||	TRUE	igd	NA	NA	NA	NA	NA	NA	NA	0.003	1.7e-09	CRB2	Television	TRUE	TRUE
333	rs1243182	T	C	T	C	0.019	0.0103552	0.31	0.328732	FALSE	FALSE	FALSE	ieu-a-967	10	21916728	0.029251	18313	0.728271	Squamous cell lung cancer || id:ieu-a-967	Squamous cell lung cancer	Squamous cell lung cancer || ||	TRUE	igd	NA	NA	NA	NA	NA	NA	NA	0.002	2e-15	MLLT10	Television	TRUE	TRUE
334	rs12491503	A	G	A	G	0.014	-0.0455425	0.33	0.326596	FALSE	FALSE	FALSE	ieu-a-967	3	165706855	0.027698	18313	0.12701	Squamous cell lung cancer || id:ieu-a-967	Squamous cell lung cancer	Squamous cell lung cancer || ||	TRUE	igd	NA	NA	NA	NA	NA	NA	NA	0.002	5.5e-10	BCHE	Television	TRUE	TRUE
335	rs12554512	C	T	C	T	-0.021	-0.0106242	0.416	0.392003	FALSE	FALSE	FALSE	ieu-a-967	9	23352293	0.028897	18313	0.723894	Squamous cell lung cancer || id:ieu-a-967	Squamous cell lung cancer	Squamous cell lung cancer || ||	TRUE	igd	NA	NA	NA	NA	NA	NA	NA	0.002	3.8e-21	ELAVL2	Television	TRUE	TRUE
336	rs13107325	T	C	T	C	0.029	0.0140627	0.074	0.0777484	FALSE	FALSE	FALSE	ieu-a-967	4	103188709	0.052977	18313	0.798589	Squamous cell lung cancer || id:ieu-a-967	Squamous cell lung cancer	Squamous cell lung cancer || ||	TRUE	igd	NA	NA	NA	NA	NA	NA	NA	0.004	1.5e-12	SLC39A8	Television	TRUE	TRUE
337	rs1451533	A	G	A	G	0.016	0.00472582	0.275	0.269445	FALSE	FALSE	FALSE	ieu-a-967	2	105466005	0.031412	18313	0.883521	Squamous cell lung cancer || id:ieu-a-967	Squamous cell lung cancer	Squamous cell lung cancer || ||	TRUE	igd	NA	NA	NA	NA	NA	NA	NA	0.002	1.1e-10	POU3F3	Television	TRUE	TRUE
338	rs148544378	T	C	T	C	-0.053	0.0205964	0.021	0.0134688	FALSE	FALSE	FALSE	ieu-a-967	18	40323567	0.133551	18313	0.891603	Squamous cell lung cancer || id:ieu-a-967	Squamous cell lung cancer	Squamous cell lung cancer || ||	TRUE	igd	NA	NA	NA	NA	NA	NA	NA	0.008	2.2e-12	RIT2	Television	TRUE	TRUE
339	rs148648822	T	G	T	G	0.018	0.0252135	0.157	0.140532	FALSE	FALSE	FALSE	ieu-a-967	1	97815048	0.041548	18313	0.550321	Squamous cell lung cancer || id:ieu-a-967	Squamous cell lung cancer	Squamous cell lung cancer || ||	TRUE	igd	NA	NA	NA	NA	NA	NA	NA	0.003	4.2e-09	DPYD	Television	TRUE	TRUE
340	rs17207890	A	G	A	G	-0.016	-0.0569323	0.343	0.332045	FALSE	FALSE	FALSE	ieu-a-967	11	95490754	0.027754	18313	0.0599225	Squamous cell lung cancer || id:ieu-a-967	Squamous cell lung cancer	Squamous cell lung cancer || ||	TRUE	igd	NA	NA	NA	NA	NA	NA	NA	0.002	6.7e-12	CEP57	Television	TRUE	TRUE
341	rs17379561	T	A	T	A	0.025	0.0470191	0.144	0.156056	TRUE	TRUE	TRUE	ieu-a-967	1	98340139	0.039072	18313	0.224469	Squamous cell lung cancer || id:ieu-a-967	Squamous cell lung cancer	Squamous cell lung cancer || ||	TRUE	igd	NA	NA	NA	NA	NA	NA	NA	0.003	1.1e-16	DPYD	Television	TRUE	FALSE
342	rs17568389	A	T	A	T	-0.015	-0.061806	0.513	0.494897	TRUE	TRUE	TRUE	ieu-a-967	7	8109522	0.02942	18313	0.0297529	Squamous cell lung cancer || id:ieu-a-967	Squamous cell lung cancer	Squamous cell lung cancer || ||	TRUE	igd	TRUE	rs17568389	rs4725065	A	T	G	A	0.002	8.6e-13	GLCCI1	Television	TRUE	FALSE
343	rs17727474	T	C	T	C	-0.018	-0.0489109	0.168	0.1905	FALSE	FALSE	FALSE	ieu-a-967	10	127182959	0.033839	18313	0.184192	Squamous cell lung cancer || id:ieu-a-967	Squamous cell lung cancer	Squamous cell lung cancer || ||	TRUE	igd	NA	NA	NA	NA	NA	NA	NA	0.003	3.1e-09	TEX36	Television	TRUE	TRUE
344	rs17789218	C	T	C	T	-0.019	-0.0130174	0.244	0.233791	FALSE	FALSE	FALSE	ieu-a-967	6	100600097	0.03265	18313	0.703484	Squamous cell lung cancer || id:ieu-a-967	Squamous cell lung cancer	Squamous cell lung cancer || ||	TRUE	igd	NA	NA	NA	NA	NA	NA	NA	0.003	1.4e-13	MCHR2	Television	TRUE	TRUE
345	rs182355396	A	C	A	C	0.08	0.0906859	0.008	0.016115	FALSE	FALSE	FALSE	ieu-a-967	3	50920457	0.141914	18313	0.544223	Squamous cell lung cancer || id:ieu-a-967	Squamous cell lung cancer	Squamous cell lung cancer || ||	TRUE	igd	NA	NA	NA	NA	NA	NA	NA	0.013	2.1e-10	DOCK3	Television	TRUE	TRUE
346	rs1913808	A	G	A	G	-0.015	-0.0179949	0.287	0.302577	FALSE	FALSE	FALSE	ieu-a-967	2	162804678	0.028942	18313	0.553299	Squamous cell lung cancer || id:ieu-a-967	Squamous cell lung cancer	Squamous cell lung cancer || ||	TRUE	igd	NA	NA	NA	NA	NA	NA	NA	0.002	3.9e-10	SLC4A10	Television	TRUE	TRUE
347	rs2034768	G	A	G	A	-0.015	-0.0130455	0.513	0.536327	FALSE	FALSE	TRUE	ieu-a-967	3	93986371	0.027911	18313	0.645078	Squamous cell lung cancer || id:ieu-a-967	Squamous cell lung cancer	Squamous cell lung cancer || ||	TRUE	igd	NA	NA	NA	NA	NA	NA	NA	0.002	8.6e-12	NSUN3	Television	TRUE	TRUE
348	rs2045147	G	A	G	A	-0.013	-0.0348052	0.551	0.54701	FALSE	FALSE	TRUE	ieu-a-967	10	56660437	0.028507	18313	0.218761	Squamous cell lung cancer || id:ieu-a-967	Squamous cell lung cancer	Squamous cell lung cancer || ||	TRUE	igd	NA	NA	NA	NA	NA	NA	NA	0.002	5.9e-09	PCDH15	Television	TRUE	TRUE
349	rs2073869	T	C	T	C	-0.019	0.0291927	0.166	0.197244	FALSE	FALSE	FALSE	ieu-a-967	9	135763816	0.034951	18313	0.40595	Squamous cell lung cancer || id:ieu-a-967	Squamous cell lung cancer	Squamous cell lung cancer || ||	TRUE	igd	NA	NA	NA	NA	NA	NA	NA	0.003	1.5e-10	AK8	Television	TRUE	TRUE
350	rs2173650	T	G	T	G	-0.018	-0.0387128	0.148	0.145069	FALSE	FALSE	FALSE	ieu-a-967	12	117525235	0.038922	18313	0.358402	Squamous cell lung cancer || id:ieu-a-967	Squamous cell lung cancer	Squamous cell lung cancer || ||	TRUE	igd	NA	NA	NA	NA	NA	NA	NA	0.003	4.6e-09	TESC	Television	TRUE	TRUE
351	rs2184364	G	A	G	A	-0.016	-0.0185816	0.218	0.230019	FALSE	FALSE	FALSE	ieu-a-967	6	143183596	0.032414	18313	0.586266	Squamous cell lung cancer || id:ieu-a-967	Squamous cell lung cancer	Squamous cell lung cancer || ||	TRUE	igd	NA	NA	NA	NA	NA	NA	NA	0.003	3e-09	HIVEP2	Television	TRUE	TRUE
352	rs2291681	T	G	T	G	-0.013	-0.00258233	0.416	0.4059	FALSE	FALSE	FALSE	ieu-a-967	9	14790841	0.02762	18313	0.927707	Squamous cell lung cancer || id:ieu-a-967	Squamous cell lung cancer	Squamous cell lung cancer || ||	TRUE	igd	NA	NA	NA	NA	NA	NA	NA	0.002	7.9e-09	FREM1	Television	TRUE	TRUE
353	rs2447098	A	C	A	C	0.015	0.0465875	0.525	0.521988	FALSE	FALSE	TRUE	ieu-a-967	17	2277720	0.026574	18313	0.103692	Squamous cell lung cancer || id:ieu-a-967	Squamous cell lung cancer	Squamous cell lung cancer || ||	TRUE	igd	NA	NA	NA	NA	NA	NA	NA	0.002	6.8e-12	MNT	Television	TRUE	TRUE
354	rs2460	A	G	A	G	0.015	-0.0167078	0.264	0.254008	FALSE	FALSE	FALSE	ieu-a-967	15	53073084	0.031666	18313	0.615459	Squamous cell lung cancer || id:ieu-a-967	Squamous cell lung cancer	Squamous cell lung cancer || ||	TRUE	igd	NA	NA	NA	NA	NA	NA	NA	0.002	5e-10	ONECUT1	Television	TRUE	TRUE
355	rs2584597	C	T	C	T	-0.015	-0.00334258	0.338	0.28192	FALSE	FALSE	FALSE	ieu-a-967	17	61941284	0.031536	18313	0.91847	Squamous cell lung cancer || id:ieu-a-967	Squamous cell lung cancer	Squamous cell lung cancer || ||	TRUE	igd	NA	NA	NA	NA	NA	NA	NA	0.002	2.9e-10	CSH2	Television	TRUE	TRUE
356	rs2616830	A	G	A	G	-0.016	-0.00131513	0.538	0.557848	FALSE	FALSE	TRUE	ieu-a-967	9	1721385	0.02745	18313	0.962763	Squamous cell lung cancer || id:ieu-a-967	Squamous cell lung cancer	Squamous cell lung cancer || ||	TRUE	igd	NA	NA	NA	NA	NA	NA	NA	0.002	2.9e-14	SMARCA2	Television	TRUE	TRUE
357	rs262890	G	A	G	A	0.019	0.0799759	0.301	0.301877	FALSE	FALSE	FALSE	ieu-a-967	5	62930015	0.032142	18313	0.00891005	Squamous cell lung cancer || id:ieu-a-967	Squamous cell lung cancer	Squamous cell lung cancer || ||	TRUE	igd	NA	NA	NA	NA	NA	NA	NA	0.002	3.2e-15	HTR1A	Television	TRUE	TRUE
358	rs263771	A	C	A	C	0.017	0.0450145	0.233	0.221516	FALSE	FALSE	FALSE	ieu-a-967	2	185921692	0.034977	18313	0.193029	Squamous cell lung cancer || id:ieu-a-967	Squamous cell lung cancer	Squamous cell lung cancer || ||	TRUE	igd	NA	NA	NA	NA	NA	NA	NA	0.003	3.1e-11	ZNF804A	Television	TRUE	TRUE
359	rs2971640	A	G	A	G	0.013	0.0574705	0.495	0.514023	FALSE	FALSE	TRUE	ieu-a-967	2	107624618	0.028884	18313	0.0403292	Squamous cell lung cancer || id:ieu-a-967	Squamous cell lung cancer	Squamous cell lung cancer || ||	TRUE	igd	NA	NA	NA	NA	NA	NA	NA	0.002	4.2e-09	ST6GAL2	Television	TRUE	TRUE
360	rs303753	A	G	A	G	0.014	0.05284	0.347	0.346264	FALSE	FALSE	FALSE	ieu-a-967	18	21074922	0.03048	18313	0.0758438	Squamous cell lung cancer || id:ieu-a-967	Squamous cell lung cancer	Squamous cell lung cancer || ||	TRUE	igd	NA	NA	NA	NA	NA	NA	NA	0.002	2.7e-10	C18orf8	Television	TRUE	TRUE
361	rs34811474	A	G	A	G	-0.015	-0.0654488	0.232	0.210426	FALSE	FALSE	FALSE	ieu-a-967	4	25408838	0.039635	18313	0.138429	Squamous cell lung cancer || id:ieu-a-967	Squamous cell lung cancer	Squamous cell lung cancer || ||	TRUE	igd	NA	NA	NA	NA	NA	NA	NA	0.003	2.3e-09	ANAPC4	Television	TRUE	TRUE
362	rs34864022	G	A	G	A	0.026	0.0300247	0.066	0.0627246	FALSE	FALSE	FALSE	ieu-a-967	9	22609110	0.056959	18313	0.607835	Squamous cell lung cancer || id:ieu-a-967	Squamous cell lung cancer	Squamous cell lung cancer || ||	TRUE	igd	NA	NA	NA	NA	NA	NA	NA	0.004	1.4e-09	DMRTA1	Television	TRUE	TRUE
363	rs374722	A	G	A	G	-0.024	-0.0239313	0.85	0.852867	FALSE	FALSE	FALSE	ieu-a-967	2	147839830	0.038674	18313	0.541852	Squamous cell lung cancer || id:ieu-a-967	Squamous cell lung cancer	Squamous cell lung cancer || ||	TRUE	igd	NA	NA	NA	NA	NA	NA	NA	0.003	5.5e-16	PABPC1P2	Television	TRUE	TRUE
364	rs3754970	C	T	C	T	0.015	0.0359153	0.504	0.485259	FALSE	FALSE	TRUE	ieu-a-967	2	162091836	0.026432	18313	0.202162	Squamous cell lung cancer || id:ieu-a-967	Squamous cell lung cancer	Squamous cell lung cancer || ||	TRUE	igd	NA	NA	NA	NA	NA	NA	NA	0.002	4.8e-12	TANK	Television	TRUE	TRUE
365	rs3796386	A	G	A	G	0.026	-0.00444386	0.428	0.41362	FALSE	FALSE	TRUE	ieu-a-967	3	49899795	0.027631	18313	0.876247	Squamous cell lung cancer || id:ieu-a-967	Squamous cell lung cancer	Squamous cell lung cancer || ||	TRUE	igd	NA	NA	NA	NA	NA	NA	NA	0.002	3.2e-33	CAMKV	Television	TRUE	TRUE
366	rs42210	C	G	C	G	0.014	-0.0159796	0.711	0.713975	TRUE	TRUE	TRUE	ieu-a-967	5	166408788	0.03083	18313	0.609488	Squamous cell lung cancer || id:ieu-a-967	Squamous cell lung cancer	Squamous cell lung cancer || ||	TRUE	igd	NA	NA	NA	NA	NA	NA	NA	0.002	7.3e-09	TENM2	Television	TRUE	FALSE
367	rs4382592	G	T	G	T	-0.014	-0.086992	0.699	0.693277	FALSE	FALSE	FALSE	ieu-a-967	9	134870755	0.032033	18313	0.00403497	Squamous cell lung cancer || id:ieu-a-967	Squamous cell lung cancer	Squamous cell lung cancer || ||	TRUE	igd	NA	NA	NA	NA	NA	NA	NA	0.002	6.7e-09	MED27	Television	TRUE	TRUE
368	rs4577309	G	A	G	A	-0.016	-0.0835964	0.531	0.521654	FALSE	FALSE	TRUE	ieu-a-967	2	191288833	0.029723	18313	0.00294002	Squamous cell lung cancer || id:ieu-a-967	Squamous cell lung cancer	Squamous cell lung cancer || ||	TRUE	igd	NA	NA	NA	NA	NA	NA	NA	0.002	1.6e-13	MFSD6	Television	TRUE	TRUE
369	rs4845364	G	A	G	A	0.015	0.0117346	0.505	0.518557	FALSE	FALSE	TRUE	ieu-a-967	1	154141908	0.027072	18313	0.676849	Squamous cell lung cancer || id:ieu-a-967	Squamous cell lung cancer	Squamous cell lung cancer || ||	TRUE	igd	NA	NA	NA	NA	NA	NA	NA	0.002	1.3e-12	TPM3	Television	TRUE	TRUE
370	rs4973576	A	C	A	C	0.015	0.0105474	0.702	0.694245	FALSE	FALSE	FALSE	ieu-a-967	2	233806771	0.030406	18313	0.739295	Squamous cell lung cancer || id:ieu-a-967	Squamous cell lung cancer	Squamous cell lung cancer || ||	TRUE	igd	NA	NA	NA	NA	NA	NA	NA	0.002	1e-09	NGEF	Television	TRUE	TRUE
371	rs553397860	G	A	G	A	-0.017	0.0344005	0.155	0.15458	FALSE	FALSE	FALSE	ieu-a-967	13	99055774	0.03907	18313	0.380411	Squamous cell lung cancer || id:ieu-a-967	Squamous cell lung cancer	Squamous cell lung cancer || ||	TRUE	igd	TRUE	rs553397860	rs9513416	G	A	G	A	0.003	8.9e-09	FARP1	Television	TRUE	TRUE
372	rs56103247	T	C	T	C	-0.03	-0.0446167	0.056	0.0531151	FALSE	FALSE	FALSE	ieu-a-967	20	62483184	0.068851	18313	0.565374	Squamous cell lung cancer || id:ieu-a-967	Squamous cell lung cancer	Squamous cell lung cancer || ||	TRUE	igd	NA	NA	NA	NA	NA	NA	NA	0.005	3.8e-10	ABHD16B	Television	TRUE	TRUE
373	rs56398417	T	C	T	C	-0.014	0.0464312	0.313	0.3012	FALSE	FALSE	FALSE	ieu-a-967	3	88024986	0.032324	18313	0.144628	Squamous cell lung cancer || id:ieu-a-967	Squamous cell lung cancer	Squamous cell lung cancer || ||	TRUE	igd	NA	NA	NA	NA	NA	NA	NA	0.002	5.9e-10	HTR1F	Television	TRUE	TRUE
374	rs56858768	A	G	A	G	0.015	-0.0143698	0.299	0.286908	FALSE	FALSE	FALSE	ieu-a-967	13	86511730	0.029564	18313	0.642031	Squamous cell lung cancer || id:ieu-a-967	Squamous cell lung cancer	Squamous cell lung cancer || ||	TRUE	igd	NA	NA	NA	NA	NA	NA	NA	0.002	3.4e-10	SLITRK6	Television	TRUE	TRUE
375	rs57585211	G	T	G	T	0.017	0.00845416	0.173	0.159315	FALSE	FALSE	FALSE	ieu-a-967	5	107197725	0.037412	18313	0.826237	Squamous cell lung cancer || id:ieu-a-967	Squamous cell lung cancer	Squamous cell lung cancer || ||	TRUE	igd	NA	NA	NA	NA	NA	NA	NA	0.003	4.3e-09	FBXL17	Television	TRUE	TRUE
376	rs6131281	T	C	T	C	-0.016	0.0521815	0.403	0.4057	FALSE	FALSE	FALSE	ieu-a-967	20	11891724	0.029246	18313	0.0675305	Squamous cell lung cancer || id:ieu-a-967	Squamous cell lung cancer	Squamous cell lung cancer || ||	TRUE	igd	NA	NA	NA	NA	NA	NA	NA	0.002	3.1e-13	BTBD3	Television	TRUE	TRUE
377	rs61331678	C	G	C	G	-0.015	-0.024429	0.432	0.42259	TRUE	TRUE	TRUE	ieu-a-967	15	78017272	0.026911	18313	0.388854	Squamous cell lung cancer || id:ieu-a-967	Squamous cell lung cancer	Squamous cell lung cancer || ||	TRUE	igd	TRUE	rs61331678	rs4886901	C	G	A	G	0.002	6.1e-12	LINGO1	Television	TRUE	FALSE
378	rs6141814	A	C	A	C	0.014	0.0117112	0.387	0.376028	FALSE	FALSE	FALSE	ieu-a-967	20	31368960	0.028482	18313	0.685908	Squamous cell lung cancer || id:ieu-a-967	Squamous cell lung cancer	Squamous cell lung cancer || ||	TRUE	igd	NA	NA	NA	NA	NA	NA	NA	0.002	1.3e-09	DNMT3B	Television	TRUE	TRUE
379	rs62332760	T	G	T	G	0.014	-0.0274339	0.387	0.366858	FALSE	FALSE	FALSE	ieu-a-967	4	106135316	0.027653	18313	0.348185	Squamous cell lung cancer || id:ieu-a-967	Squamous cell lung cancer	Squamous cell lung cancer || ||	TRUE	igd	NA	NA	NA	NA	NA	NA	NA	0.002	8e-11	TET2	Television	TRUE	TRUE
380	rs62379379	T	G	T	G	0.026	0.0993248	0.071	0.0818108	FALSE	FALSE	FALSE	ieu-a-967	5	141082015	0.05723	18313	0.0691162	Squamous cell lung cancer || id:ieu-a-967	Squamous cell lung cancer	Squamous cell lung cancer || ||	TRUE	igd	NA	NA	NA	NA	NA	NA	NA	0.004	7.8e-10	ARAP3	Television	TRUE	TRUE
381	rs62471080	C	G	C	G	0.013	0.006473	0.459	0.453049	TRUE	TRUE	TRUE	ieu-a-967	7	109132039	0.027697	18313	0.819004	Squamous cell lung cancer || id:ieu-a-967	Squamous cell lung cancer	Squamous cell lung cancer || ||	TRUE	igd	TRUE	rs62471080	rs58683261	C	G	G	T	0.002	3.7e-09	EIF3IP1	Television	TRUE	FALSE
382	rs62641636	G	A	G	A	-0.014	-0.0382534	0.308	0.32242	FALSE	FALSE	FALSE	ieu-a-967	2	68425427	0.030149	18313	0.236657	Squamous cell lung cancer || id:ieu-a-967	Squamous cell lung cancer	Squamous cell lung cancer || ||	TRUE	igd	NA	NA	NA	NA	NA	NA	NA	0.002	7e-10	PPP3R1	Television	TRUE	TRUE
383	rs631130	A	T	A	T	0.014	0.0238215	0.631	0.638426	TRUE	TRUE	TRUE	ieu-a-967	1	96043010	0.033184	18313	0.498208	Squamous cell lung cancer || id:ieu-a-967	Squamous cell lung cancer	Squamous cell lung cancer || ||	TRUE	igd	NA	NA	NA	NA	NA	NA	NA	0.002	5e-09	RWDD3	Television	TRUE	FALSE
384	rs6472942	C	T	C	T	0.013	0.0148009	0.432	0.435252	FALSE	FALSE	TRUE	ieu-a-967	8	76827190	0.028082	18313	0.602889	Squamous cell lung cancer || id:ieu-a-967	Squamous cell lung cancer	Squamous cell lung cancer || ||	TRUE	igd	NA	NA	NA	NA	NA	NA	NA	0.002	1.8e-09	HNF4G	Television	TRUE	TRUE
385	rs648044	G	A	G	A	0.014	0.00497837	0.605	0.616076	FALSE	FALSE	FALSE	ieu-a-967	11	114030799	0.031053	18313	0.87712	Squamous cell lung cancer || id:ieu-a-967	Squamous cell lung cancer	Squamous cell lung cancer || ||	TRUE	igd	NA	NA	NA	NA	NA	NA	NA	0.002	1e-09	ZBTB16	Television	TRUE	TRUE
386	rs6673341	G	T	G	T	0.015	0.0281917	0.535	0.524138	FALSE	FALSE	TRUE	ieu-a-967	1	184655649	0.026573	18313	0.31559	Squamous cell lung cancer || id:ieu-a-967	Squamous cell lung cancer	Squamous cell lung cancer || ||	TRUE	igd	NA	NA	NA	NA	NA	NA	NA	0.002	2.2e-11	EDEM3	Television	TRUE	TRUE
387	rs66852340	T	C	T	C	0.018	0.0011853	0.224	0.227568	FALSE	FALSE	FALSE	ieu-a-967	4	3311070	0.033098	18313	0.972315	Squamous cell lung cancer || id:ieu-a-967	Squamous cell lung cancer	Squamous cell lung cancer || ||	TRUE	igd	NA	NA	NA	NA	NA	NA	NA	0.003	7.9e-12	RGS12	Television	TRUE	TRUE
388	rs6721975	C	T	C	T	0.017	0.0590061	0.768	0.692462	FALSE	FALSE	FALSE	ieu-a-967	2	5832667	0.033392	18313	0.107987	Squamous cell lung cancer || id:ieu-a-967	Squamous cell lung cancer	Squamous cell lung cancer || ||	TRUE	igd	NA	NA	NA	NA	NA	NA	NA	0.003	1.7e-10	SOX11	Television	TRUE	TRUE
389	rs6797840	C	A	C	A	0.016	-0.0214522	0.544	0.537427	FALSE	FALSE	TRUE	ieu-a-967	3	85656569	0.027987	18313	0.446134	Squamous cell lung cancer || id:ieu-a-967	Squamous cell lung cancer	Squamous cell lung cancer || ||	TRUE	igd	NA	NA	NA	NA	NA	NA	NA	0.002	1.7e-13	CADM2	Television	TRUE	TRUE
390	rs6825241	A	C	A	C	0.017	-0.0208029	0.464	0.45519	FALSE	FALSE	TRUE	ieu-a-967	4	152543783	0.026687	18313	0.457568	Squamous cell lung cancer || id:ieu-a-967	Squamous cell lung cancer	Squamous cell lung cancer || ||	TRUE	igd	NA	NA	NA	NA	NA	NA	NA	0.002	4.9e-15	FAM160A1	Television	TRUE	TRUE
391	rs6850494	C	A	C	A	0.014	0.0141465	0.384	0.399629	FALSE	FALSE	FALSE	ieu-a-967	4	82291771	0.02891	18313	0.6296	Squamous cell lung cancer || id:ieu-a-967	Squamous cell lung cancer	Squamous cell lung cancer || ||	TRUE	igd	NA	NA	NA	NA	NA	NA	NA	0.002	1.1e-10	RASGEF1B	Television	TRUE	TRUE
392	rs6905544	G	A	G	A	0.019	0.00172348	0.601	0.61759	FALSE	FALSE	FALSE	ieu-a-967	6	98411631	0.028391	18313	0.953022	Squamous cell lung cancer || id:ieu-a-967	Squamous cell lung cancer	Squamous cell lung cancer || ||	TRUE	igd	NA	NA	NA	NA	NA	NA	NA	0.002	8.5e-18	MMS22L	Television	TRUE	TRUE
393	rs7043521	T	A	T	A	-0.014	-0.0625982	0.569	0.583278	TRUE	TRUE	TRUE	ieu-a-967	9	124605896	0.029302	18313	0.0269581	Squamous cell lung cancer || id:ieu-a-967	Squamous cell lung cancer	Squamous cell lung cancer || ||	TRUE	igd	TRUE	rs7043521	rs10760193	A	T	C	T	0.002	6.5e-11	TTLL11	Television	TRUE	FALSE
394	rs7184800	A	G	A	G	-0.017	0.0137658	0.303	0.304864	FALSE	FALSE	FALSE	ieu-a-967	16	53509131	0.030336	18313	0.655303	Squamous cell lung cancer || id:ieu-a-967	Squamous cell lung cancer	Squamous cell lung cancer || ||	TRUE	igd	NA	NA	NA	NA	NA	NA	NA	0.002	8.2e-13	RBL2	Television	TRUE	TRUE
395	rs7189927	C	T	C	T	-0.015	-0.0569492	0.644	0.642833	FALSE	FALSE	FALSE	ieu-a-967	16	28913787	0.030527	18313	0.0550656	Squamous cell lung cancer || id:ieu-a-967	Squamous cell lung cancer	Squamous cell lung cancer || ||	TRUE	igd	NA	NA	NA	NA	NA	NA	NA	0.002	3.4e-11	ATP2A1	Television	TRUE	TRUE
396	rs7248205	T	C	T	C	-0.014	-0.0257769	0.602	0.568005	FALSE	FALSE	TRUE	ieu-a-967	19	10770305	0.030378	18313	0.398007	Squamous cell lung cancer || id:ieu-a-967	Squamous cell lung cancer	Squamous cell lung cancer || ||	TRUE	igd	NA	NA	NA	NA	NA	NA	NA	0.002	3.4e-10	ILF3	Television	TRUE	TRUE
397	rs72725224	C	A	C	A	0.046	-0.117364	0.02	0.0180332	FALSE	FALSE	FALSE	ieu-a-967	1	188115858	0.09439	18313	0.324013	Squamous cell lung cancer || id:ieu-a-967	Squamous cell lung cancer	Squamous cell lung cancer || ||	TRUE	igd	NA	NA	NA	NA	NA	NA	NA	0.008	3.7e-09	BRINP3	Television	TRUE	TRUE
398	rs72781699	A	G	A	G	0.019	-0.0242292	0.203	0.1865	FALSE	FALSE	FALSE	ieu-a-967	2	24277709	0.034101	18313	0.503212	Squamous cell lung cancer || id:ieu-a-967	Squamous cell lung cancer	Squamous cell lung cancer || ||	TRUE	igd	NA	NA	NA	NA	NA	NA	NA	0.003	3e-12	FKBP1B	Television	TRUE	TRUE
399	rs72828890	T	C	T	C	-0.019	0.0232125	0.131	0.116149	FALSE	FALSE	FALSE	ieu-a-967	5	167806836	0.048431	18313	0.64022	Squamous cell lung cancer || id:ieu-a-967	Squamous cell lung cancer	Squamous cell lung cancer || ||	TRUE	igd	NA	NA	NA	NA	NA	NA	NA	0.003	4.9e-09	WWC1	Television	TRUE	TRUE
400	rs72834698	A	G	A	G	-0.023	-0.0706231	0.142	0.142413	FALSE	FALSE	FALSE	ieu-a-967	6	26176517	0.038247	18313	0.098853	Squamous cell lung cancer || id:ieu-a-967	Squamous cell lung cancer	Squamous cell lung cancer || ||	TRUE	igd	NA	NA	NA	NA	NA	NA	NA	0.003	2.7e-13	HIST1H2BD	Television	TRUE	TRUE
401	rs74802478	A	G	A	G	-0.017	-0.0682553	0.181	0.161951	FALSE	FALSE	FALSE	ieu-a-967	11	131966907	0.035176	18313	0.0810494	Squamous cell lung cancer || id:ieu-a-967	Squamous cell lung cancer	Squamous cell lung cancer || ||	TRUE	igd	NA	NA	NA	NA	NA	NA	NA	0.003	3.5e-09	NTM	Television	TRUE	TRUE
402	rs749671	A	G	A	G	-0.016	-0.0633723	0.371	0.377077	FALSE	FALSE	FALSE	ieu-a-967	16	31088347	0.026783	18313	0.030935	Squamous cell lung cancer || id:ieu-a-967	Squamous cell lung cancer	Squamous cell lung cancer || ||	TRUE	igd	NA	NA	NA	NA	NA	NA	NA	0.002	2.7e-12	PRSS53	Television	TRUE	TRUE
403	rs74996610	G	C	G	C	0.031	0.0417109	0.046	0.0450571	TRUE	TRUE	TRUE	ieu-a-967	12	24075007	0.066894	18313	0.543006	Squamous cell lung cancer || id:ieu-a-967	Squamous cell lung cancer	Squamous cell lung cancer || ||	TRUE	igd	NA	NA	NA	NA	NA	NA	NA	0.005	4.1e-09	SOX5	Television	TRUE	FALSE
404	rs7564130	C	T	C	T	0.015	0.0452936	0.359	0.384237	FALSE	FALSE	FALSE	ieu-a-967	2	50606642	0.029174	18313	0.114174	Squamous cell lung cancer || id:ieu-a-967	Squamous cell lung cancer	Squamous cell lung cancer || ||	TRUE	igd	NA	NA	NA	NA	NA	NA	NA	0.002	2.8e-11	NRXN1	Television	TRUE	TRUE
405	rs7609	T	A	T	A	-0.015	0.00791524	0.769	0.780295	TRUE	TRUE	TRUE	ieu-a-967	22	29951650	0.032336	18313	0.814206	Squamous cell lung cancer || id:ieu-a-967	Squamous cell lung cancer	Squamous cell lung cancer || ||	TRUE	igd	NA	NA	NA	NA	NA	NA	NA	0.003	3.6e-09	NIPSNAP1	Television	TRUE	FALSE
406	rs7693082	C	G	C	G	-0.015	0.00636924	0.7	0.700238	TRUE	TRUE	TRUE	ieu-a-967	4	159857819	0.029542	18313	0.835286	Squamous cell lung cancer || id:ieu-a-967	Squamous cell lung cancer	Squamous cell lung cancer || ||	TRUE	igd	NA	NA	NA	NA	NA	NA	NA	0.002	1.7e-10	C4orf45	Television	TRUE	FALSE
407	rs7693703	A	G	A	G	-0.023	0.0485968	0.09	0.0958654	FALSE	FALSE	FALSE	ieu-a-967	4	118357405	0.047748	18313	0.307661	Squamous cell lung cancer || id:ieu-a-967	Squamous cell lung cancer	Squamous cell lung cancer || ||	TRUE	igd	NA	NA	NA	NA	NA	NA	NA	0.004	2.7e-09	TRAM1L1	Television	TRUE	TRUE
408	rs7716447	G	A	G	A	0.013	0.0511797	0.361	0.252026	FALSE	FALSE	FALSE	ieu-a-967	5	88800331	0.039659	18313	0.191036	Squamous cell lung cancer || id:ieu-a-967	Squamous cell lung cancer	Squamous cell lung cancer || ||	TRUE	igd	NA	NA	NA	NA	NA	NA	NA	0.002	3.6e-09	MEF2C	Television	TRUE	TRUE
409	rs7788008	A	G	A	G	-0.013	0.0219816	0.434	0.447814	FALSE	FALSE	TRUE	ieu-a-967	7	112972483	0.028229	18313	0.438795	Squamous cell lung cancer || id:ieu-a-967	Squamous cell lung cancer	Squamous cell lung cancer || ||	TRUE	igd	NA	NA	NA	NA	NA	NA	NA	0.002	5.9e-09	PPP1R3A	Television	TRUE	TRUE
410	rs7834121	T	G	T	G	0.014	-0.0370202	0.496	0.490156	FALSE	FALSE	TRUE	ieu-a-967	8	10770311	0.029342	18313	0.203127	Squamous cell lung cancer || id:ieu-a-967	Squamous cell lung cancer	Squamous cell lung cancer || ||	TRUE	igd	TRUE	rs7834121	rs7834248	T	G	T	G	0.002	1.1e-10	XKR6	Television	TRUE	TRUE
411	rs78394231	C	T	C	T	0.021	0.027009	0.098	0.0978131	FALSE	FALSE	FALSE	ieu-a-967	6	107649123	0.046341	18313	0.567407	Squamous cell lung cancer || id:ieu-a-967	Squamous cell lung cancer	Squamous cell lung cancer || ||	TRUE	igd	NA	NA	NA	NA	NA	NA	NA	0.004	9.7e-09	PDSS2	Television	TRUE	TRUE
412	rs7991062	G	C	G	C	0.018	0.0312981	0.341	0.34387	TRUE	TRUE	TRUE	ieu-a-967	13	100713194	0.030135	18313	0.298028	Squamous cell lung cancer || id:ieu-a-967	Squamous cell lung cancer	Squamous cell lung cancer || ||	TRUE	igd	NA	NA	NA	NA	NA	NA	NA	0.002	8.8e-15	PCCA	Television	TRUE	FALSE
413	rs801733	C	A	C	A	-0.017	-0.0124492	0.359	0.338369	FALSE	FALSE	FALSE	ieu-a-967	11	65934549	0.028365	18313	0.673677	Squamous cell lung cancer || id:ieu-a-967	Squamous cell lung cancer	Squamous cell lung cancer || ||	TRUE	igd	NA	NA	NA	NA	NA	NA	NA	0.002	7.3e-14	PACS1	Television	TRUE	TRUE
414	rs8756	A	C	A	C	0.013	-0.00850176	0.515	0.518258	FALSE	FALSE	TRUE	ieu-a-967	12	66359752	0.027509	18313	0.76167	Squamous cell lung cancer || id:ieu-a-967	Squamous cell lung cancer	Squamous cell lung cancer || ||	TRUE	igd	NA	NA	NA	NA	NA	NA	NA	0.002	5.3e-10	HMGA2	Television	TRUE	TRUE
415	rs9471333	T	C	T	C	-0.013	-0.0046661	0.55	0.556651	FALSE	FALSE	TRUE	ieu-a-967	6	40362023	0.027499	18313	0.868247	Squamous cell lung cancer || id:ieu-a-967	Squamous cell lung cancer	Squamous cell lung cancer || ||	TRUE	igd	NA	NA	NA	NA	NA	NA	NA	0.002	1.5e-09	LRFN2	Television	TRUE	TRUE
416	rs9563168	A	G	A	G	-0.018	0.0426638	0.209	0.20571	FALSE	FALSE	FALSE	ieu-a-967	13	54247827	0.035	18313	0.218747	Squamous cell lung cancer || id:ieu-a-967	Squamous cell lung cancer	Squamous cell lung cancer || ||	TRUE	igd	NA	NA	NA	NA	NA	NA	NA	0.003	4.3e-11	MIR1297	Television	TRUE	TRUE
417	rs9569734	G	A	G	A	-0.019	0.0394092	0.156	0.156036	FALSE	FALSE	FALSE	ieu-a-967	13	58319476	0.039035	18313	0.311978	Squamous cell lung cancer || id:ieu-a-967	Squamous cell lung cancer	Squamous cell lung cancer || ||	TRUE	igd	NA	NA	NA	NA	NA	NA	NA	0.003	3.4e-10	PCDH17	Television	TRUE	TRUE
418	rs9834970	C	T	C	T	-0.013	0.00637265	0.499	0.485964	FALSE	FALSE	TRUE	ieu-a-967	3	36856030	0.027363	18313	0.819565	Squamous cell lung cancer || id:ieu-a-967	Squamous cell lung cancer	Squamous cell lung cancer || ||	TRUE	igd	NA	NA	NA	NA	NA	NA	NA	0.002	3.3e-09	TRANK1	Television	TRUE	TRUE
419	rs984409	A	G	A	G	0.015	-0.0125845	0.637	0.653526	FALSE	FALSE	FALSE	ieu-a-967	1	67020440	0.028829	18313	0.667512	Squamous cell lung cancer || id:ieu-a-967	Squamous cell lung cancer	Squamous cell lung cancer || ||	TRUE	igd	NA	NA	NA	NA	NA	NA	NA	0.002	4.1e-11	SGIP1	Television	TRUE	TRUE
420	rs9867121	A	C	A	C	-0.019	0.0170066	0.182	0.186832	FALSE	FALSE	FALSE	ieu-a-967	3	114631548	0.037209	18313	0.654163	Squamous cell lung cancer || id:ieu-a-967	Squamous cell lung cancer	Squamous cell lung cancer || ||	TRUE	igd	NA	NA	NA	NA	NA	NA	NA	0.003	3.9e-12	ZBTB20	Television	TRUE	TRUE
421	rs9902312	C	T	C	T	-0.015	0.0345831	0.317	0.329177	FALSE	FALSE	FALSE	ieu-a-967	17	65070304	0.029869	18313	0.244275	Squamous cell lung cancer || id:ieu-a-967	Squamous cell lung cancer	Squamous cell lung cancer || ||	TRUE	igd	NA	NA	NA	NA	NA	NA	NA	0.002	4.5e-11	HELZ	Television	TRUE	TRUE
422	rs9964724	T	C	T	C	-0.018	-0.032443	0.682	0.682299	FALSE	FALSE	FALSE	ieu-a-967	18	35159124	0.030136	18313	0.280154	Squamous cell lung cancer || id:ieu-a-967	Squamous cell lung cancer	Squamous cell lung cancer || ||	TRUE	igd	NA	NA	NA	NA	NA	NA	NA	0.002	3.3e-14	CELF4	Television	TRUE	TRUE
423	rs10186876	G	A	G	A	-0.014	0.0555286	0.64	0.621379	FALSE	FALSE	FALSE	ieu-a-967	2	44241155	0.02679	18313	0.0566852	Squamous cell lung cancer || id:ieu-a-967	Squamous cell lung cancer	Squamous cell lung cancer || ||	TRUE	igd	NA	NA	NA	NA	NA	NA	NA	0.002	7.2e-10	LRPPRC	Driving	TRUE	TRUE
424	rs1198575	C	T	C	T	-0.019	-0.013086	0.807	0.800139	FALSE	FALSE	FALSE	ieu-a-967	1	98562260	0.035214	18313	0.716213	Squamous cell lung cancer || id:ieu-a-967	Squamous cell lung cancer	Squamous cell lung cancer || ||	TRUE	igd	NA	NA	NA	NA	NA	NA	NA	0.003	2e-11	DPYD	Driving	TRUE	TRUE
425	rs4765541	C	T	C	T	-0.014	-0.00836186	0.336	0.34417	FALSE	FALSE	FALSE	ieu-a-967	12	124465995	0.02826	18313	0.775536	Squamous cell lung cancer || id:ieu-a-967	Squamous cell lung cancer	Squamous cell lung cancer || ||	TRUE	igd	NA	NA	NA	NA	NA	NA	NA	0.002	5.1e-09	CCDC92	Driving	TRUE	TRUE
426	rs6012558	A	G	A	G	-0.014	-0.0397445	0.422	0.411224	FALSE	FALSE	TRUE	ieu-a-967	20	47531286	0.027113	18313	0.170852	Squamous cell lung cancer || id:ieu-a-967	Squamous cell lung cancer	Squamous cell lung cancer || ||	TRUE	igd	NA	NA	NA	NA	NA	NA	NA	0.002	1.6e-10	ARFGEF2	Driving	TRUE	TRUE

## Sheet: Supplementary table 2
Supplementary table 2: Potentially pleiotropic SNPs of leisure sedentary behaviors in the Mendelian randomization.
Leisure television watching
Pleiotropic effect(s)	SNP	P-value	Reference (PMID or author)
Adiponectin levels	rs80270210	4e-06	Wu Y, 2013
Airway responsiveness in COPD	rs78394231	9.7e-09	Hansel NN, 2014
Autism spectrum disorder	rs2447098	6.8e-12	Kuo PH, 2015
Birth length	rs8756	5.3e-10	van der Valk RJ, 2014
Birth weight	rs8756	5.3e-10	Horikoshi M, 2012
Blood Cooper	rs749671	2.7e-12	GM, 2008
Blood pressure	rs13107325	1.5e-12	21909115
	rs7189927	3.4e-11	Lu Y, 2016
Body mass index	rs13107325	1.5e-12	29608557
	rs749671	2.7e-12	Locke AE, 2015
	rs2584597	2.9e-10	Locke AE, 2015
	rs7189927	3.4e-11	Locke AE, 2015; Willer CJ, 2008; Speliotes, 2010
Brain structure	rs8756	5.3e-10	Stein JL, 2012
Childhood body mass index	rs13107325	1.5e-12	Felix JF, 2015
Cholesterol	rs13107325	1.5e-12	20864672
Crohn's disease.	rs13107325	1.5e-12	31151823
Diastolic blood pressure	rs13107325	1.5e-12	Ehret GB, 2011
Educational attainment	rs3796386	3.2e-33	Davies G, 2016; Okbay A, 2016
	rs12554512	3.8e-21	Davies G, 2016
	rs10189857	6.2e-21	27338279
	rs6905544	8.5e-18	Okbay A, 2016
	rs11689199	5.5e-17	Okbay A, 2016; Rietveld 2013
	rs262890	3.2e-15	Okbay A, 2016;
	rs2616830	2.9e-14	Rietveld, 2013
	rs9964724	3.3e-14	Davies G, 2016; Okbay A, 2016;
	rs10772643	1.3e-12	Okbay A, 2016;
	rs3754970	4.8e-12	Rietveld, 2013
	rs11810109	5.4e-12	Okbay A, 2016;
	rs7043521	6.5e-11	Rietveld, 2013
	rs17379561	1.1e-16	Okbay A, 2016
	rs7189927	3.4e-11	Okbay A, 2016; Rietveld, 2013
	rs10786658	4.6e-11	Okbay A, 2016;
	rs11714337	4.7e-11	Okbay A, 2016;
	rs1913808	3.9e-10	Rietveld, 2013
Epithelial ovarian cancer	rs1243182	2e-15	Kuchenbaecker KB, 2015
Extraversion	rs2045147	5.9e-09	Lo MT, 2016
Fibrinogen levels	rs870151	8.8e-13	de Vries PS, 2017
Gout	rs801733	7.3e-14	Nakayama A, 2016;Matsuo H, 2015
Gut microbiota (bacterial taxa)	rs6905544	8.5e-18	Bonder MJ, 2016
HDL cholesterol	rs80270210	4e-06	Teslovich TM, 2010
Head circumference (infant)	rs8756	5.3e-10	Taal HR, 2012
Heavy alcohol consumption	rs13107325	1.5e-12	31998841
Height	rs3135044	8.7e-11	Wood AR, 2014
	rs62332760	8e-11	He M, 2014; Berndt SI, 2013;
	rs2584597	2.9e-10	Wood AR, 2014; Carty CL, 2011; N'Diaye A, 2011; Gudbjartsson DF, 2008
	rs7248205	3.4e-10	He M, 2014
	rs8756	5.3e-10	Wood AR, 2014; He M, 2014; Berndt SI, 2013; Carty CL, 2011; Lango Allen H, 2010; Liu JZ, 2010; Soranzo N 2009; Gudbjartsson DF, 2008; Weedon MN, 2008; Lettre G, 2008
Height	rs111901094	2e-09	Wood AR, 2014
Hemoglobin	rs10189857	6.2e-21	30216683
Hip circumference	rs2584597	2.9e-10	Shungin D, 2015
	rs749671	2.7e-12	Shungin D, 2015
	rs7189927	3.4e-11	Shungin D, 2015
	rs8756	5.3e-10	Shungin D, 2015
Hypertension	rs13107325	1.5e-12	Ehret GB, 2011
	rs13107325	1.5e-12	Ehret GB, 2011
Idiopathic Scoliosis	rs13107325	1.5e-12	31513097
Infant length	rs8756	5.3e-10	van der Valk RJ, 2014
Inflammatory bowel disease	rs7189927	3.4e-11	Liu JZ, 2015; Imielinski M, 2009
	rs62332760	8e-11	Liu JZ, 2015
	rs6141814	1.3e-09	Liu JZ, 2015; Jostins L, 2012
Inflammatory skin disease	rs10876864	1e-09	Baurecht H, 2015
Invasive lobular carcinoma of the breast	rs1243182	2e-15	24743323
Malaria	rs263771	3.1e-11	Band G, 2013
Menarche (age at onset)	rs3796386	3.2e-33	Perry JR, 2014; Elks CE, 2010
Neuroticism	rs9964724	3.3e-14	Okbay A, 2016;
Nicotine Dependence	rs2734849	8.2e-10	31867628
Non-glioblastoma glioma	rs648044	1e-09	Melin BS, 2017; Kinnersley B, 2015
NT-proBNP levels in acute coronary syndrome	rs13107325	1.5e-12	26908625
Obesity	rs7189927	3.4e-11	Berndt SI, 2013
Obesity-related traits	rs6673341	2.2e-11	Comuzzie AG, 2012
Ovarian cancer	rs1243182	2e-15	Pharoah PD, 2013
Parkinson's disease	rs749671	2.7e-12	Nalls MA, 2015
Psoriasis	rs71658797	6.3e-10	Tsoi LC, 2017
	rs3135044	8.7e-11	Kanazawa T
Pulse pressure	rs8756	5.3e-10	Warren, 2017
Rheumatoid arthritis	rs1913808	3.9e-10	Jiang L, 2014
	rs10876864	1e-09	Okada Y, 2013
Schizophrenia or bipolar disorder	rs10189857	6.2e-21	27338279
	rs13107325	1.5e-12	Goes FS, 2015
	rs9834970	3.3e-09	Ruderfer DM, 2013
	rs12554512	3.8e-21	Hou L, 2016
	rs9718104	9.3e-19	Kerner B, 2011
	rs9834970	3.3e-09	22182935
Sleep Duration	rs13107325	1.5e-12	27494321
Speech sound disorder and related neurocognitive domains	rs2734849	8.2e-10	25778907
Subjective response to lithium treatment	rs9834970	3.3e-09	26503763
Systolic blood pressure	rs13107325	1.5e-12	Ehret GB, 2011
Triglyceride levels	rs749671	2.7e-12	Spracklen CN, 2017
Triglycerides	rs80270210	4e-06	CN, 2017; Willer CJ, 2013; Teslovich TM, 2010
Tuberous sclerosis	rs2073869	1.5e-10	20877415
Diabetes	rs10876864	1e-09	21850031
	rs13107325	1.5e-12	23236286
Ulcerative colitis	rs62332760	8e-11	Liu JZ, 2015
	rs6141814	1.3e-09	Liu JZ, 2015
Vitiligo	rs10876864	1e-09	26870082
Waist circumference	rs7189927	3.4e-11	Shungin D, 2015
Waist-to-hip ratio	rs80270210	4e-06	Shungin D, 2015
Warfarin maintenance dose	rs749671	2.7e-12	Parra EJ, 2015; Cha PC, 2010; Takeuchi F, 2009
Weight	rs7189927	3.4e-11	Thorleifsson G, 2008
Leisure computer use
Age at voice drop	rs9477970	1e-08	Pickrell JK, 2016
Bipolar disorder	rs4977839	4.7e-19	Hou L, 2016
Cognitive function	rs11708955	4.2e-11	Davies G, 2015
	rs9477970	1e-08	Davies G, 2015
Crohn's disease	rs11708955	4.2e-11	Franke A, 2010; Liu JZ, 2015; Barrett JC, 2009; Parkes M, 2007; WTCCC, 2007
Educational attainment	rs4977839	4.7e-19	Okbay A, 2016; Davies G, 2016
	rs11708955	4.2e-11	Okbay A, 2016; Davies G, 2015; Rietveld CA, 2014
	rs1448355	1.3e-10	Okbay A, 2016
	rs6129084	9.3e-10	Okbay A, 2016
Gut microbiota	rs11708955	4.2e-11	Bonder MJ, 2016
(functional units)
Inflammatory bowel disease	rs11708955	4.2e-11	de Lange KM, 2017; Liu JZ, 2015; Jostins L, 2012
Pediatric autoimmune diseases	rs11708955	4.2e-11	Li YR, 2015
Primary sclerosing cholangitis	rs11708955	4.2e-11	Ji SG, 2016; Melum E 2010
Schizophrenia	rs13262595	1.2e-12	Goes FS, 2015; Ripke S, 2014
Ulcerative colitis	rs11708955	4.2e-11	de Lange KM, 2017; Liu JZ, 2015; Julià A, 2014; Anderson CA, 2011; McGovern DP, 2010; Barrett JC, 2009
Leisure driving
Adiponectin levels	rs4765541	5.1e-09	Wu Y, 2013
Educational attainment	rs1198575	2e-11	Rietveld CA, 2014
HDL cholesterol	rs4765541	5.1e-09	Willer CJ, 2013; Teslovich, TM
Schizophrenia	rs10189857	2.4e-07	Goes FS, 2015
Triglyceride levels	rs4765541	5.1e-09	Spracklen CN, 2017; & Willer CJ, 2013
WHR adjusted for BMI	rs4765541	5.1e-09	Shungin D, 2015
Original source of this table is from "van de Vegte YJ, Said MA, Rienstra M, van der Harst P, Verweij N. Genome-wide association studies and Mendelian randomization analyses for leisure sedentary behaviours. Nat Commun. 2020;11(1):1770."

## Sheet: Supplementary table 3
Supplementary table 3. Association between leisure sedentary behaviors and risk of lung cancer with subtypes.
	id.exposure	id.outcome	outcome	exposure	method	nsnp	b	se	pval	lo_ci	up_ci	or	or_lci95	or_uci95
1	HTIJzT	ieu-a-965	Lung adenocarcinoma || id:ieu-a-965	Television watching (overall)	MR Egger	98	0.728081	0.903116	0.422127	-1.04203	2.49819	2.0711	0.352739	12.1604
2	HTIJzT	ieu-a-965	Lung adenocarcinoma || id:ieu-a-965	Television watching (overall)	Weighted median	98	0.552246	0.280096	0.048652	0.00325719	1.10123	1.73715	1.00326	3.00788
3	HTIJzT	ieu-a-965	Lung adenocarcinoma || id:ieu-a-965	Television watching (overall)	Inverse variance weighted	98	0.492255	0.193656	0.0110251	0.112689	0.871821	1.636	1.11928	2.39126
6	HTIJzT	ieu-a-966	Lung cancer || id:ieu-a-966	Television watching (overall)	MR Egger	98	0.591502	0.661601	0.373532	-0.705235	1.88824	1.8067	0.493993	6.60773
7	HTIJzT	ieu-a-966	Lung cancer || id:ieu-a-966	Television watching (overall)	Weighted median	98	0.531941	0.193418	0.0059556	0.152842	0.911041	1.70223	1.16514	2.48691
8	HTIJzT	ieu-a-966	Lung cancer || id:ieu-a-966	Television watching (overall)	Inverse variance weighted	98	0.63984	0.141711	6.32909e-06	0.362085	0.917594	1.89618	1.43632	2.50326
11	HTIJzT	ieu-a-967	Squamous cell lung cancer || id:ieu-a-967	Television watching (overall)	MR Egger	98	0.0770445	0.952403	0.935694	-1.78967	1.94375	1.08009	0.167016	6.98493
12	HTIJzT	ieu-a-967	Squamous cell lung cancer || id:ieu-a-967	Television watching (overall)	Weighted median	98	0.501521	0.291248	0.0850752	-0.0693263	1.07237	1.65123	0.933022	2.92229
13	HTIJzT	ieu-a-967	Squamous cell lung cancer || id:ieu-a-967	Television watching (overall)	Inverse variance weighted	98	0.676051	0.205294	0.000990919	0.273675	1.07843	1.9661	1.31479	2.94005
16	ezQkco	ieu-a-965	Lung adenocarcinoma || id:ieu-a-965	Television watching (excluded pleiotropic SNPs)	MR Egger	67	0.602068	1.10786	0.588679	-1.56934	2.77348	1.82589	0.208182	16.0142
17	ezQkco	ieu-a-965	Lung adenocarcinoma || id:ieu-a-965	Television watching (excluded pleiotropic SNPs)	Weighted median	67	0.570829	0.350449	0.103345	-0.116051	1.25771	1.76973	0.89043	3.51735
18	ezQkco	ieu-a-965	Lung adenocarcinoma || id:ieu-a-965	Television watching (excluded pleiotropic SNPs)	Inverse variance weighted	67	0.665355	0.243458	0.00627721	0.188178	1.14253	1.94518	1.20705	3.1347
21	ezQkco	ieu-a-966	Lung cancer || id:ieu-a-966	Television watching (excluded pleiotropic SNPs)	MR Egger	67	0.349217	0.816675	0.670349	-1.25147	1.9499	1.41796	0.286085	7.02799
22	ezQkco	ieu-a-966	Lung cancer || id:ieu-a-966	Television watching (excluded pleiotropic SNPs)	Weighted median	67	0.535679	0.233628	0.021855	0.0777694	0.993589	1.70861	1.08087	2.70091
23	ezQkco	ieu-a-966	Lung cancer || id:ieu-a-966	Television watching (excluded pleiotropic SNPs)	Inverse variance weighted	67	0.634026	0.180226	0.000434884	0.280784	0.987269	1.88519	1.32417	2.68389
26	ezQkco	ieu-a-967	Squamous cell lung cancer || id:ieu-a-967	Television watching (excluded pleiotropic SNPs)	MR Egger	67	-0.0466013	1.24373	0.970226	-2.48432	2.39111	0.954468	0.0833826	10.9256
27	ezQkco	ieu-a-967	Squamous cell lung cancer || id:ieu-a-967	Television watching (excluded pleiotropic SNPs)	Weighted median	67	0.206108	0.367324	0.574724	-0.513848	0.926064	1.22889	0.59819	2.52455
28	ezQkco	ieu-a-967	Squamous cell lung cancer || id:ieu-a-967	Television watching (excluded pleiotropic SNPs)	Inverse variance weighted	67	0.471725	0.275534	0.0868897	-0.0683221	1.01177	1.60276	0.93396	2.75047
31	h8Mp56	ieu-a-965	Lung adenocarcinoma || id:ieu-a-965	Television watching (excluded education SNPs)	MR Egger	86	0.91545	1.00477	0.364848	-1.0539	2.8848	2.4979	0.348576	17.9
32	h8Mp56	ieu-a-965	Lung adenocarcinoma || id:ieu-a-965	Television watching (excluded education SNPs)	Weighted median	86	0.554093	0.293587	0.0591172	-0.0213376	1.12952	1.74036	0.978888	3.09418
33	h8Mp56	ieu-a-965	Lung adenocarcinoma || id:ieu-a-965	Television watching (excluded education SNPs)	Inverse variance weighted	86	0.562753	0.2132	0.00830142	0.144881	0.980624	1.7555	1.1559	2.66612
36	h8Mp56	ieu-a-966	Lung cancer || id:ieu-a-966	Television watching (excluded education SNPs)	MR Egger	86	0.556766	0.744486	0.456638	-0.902426	2.01596	1.74502	0.405584	7.50792
37	h8Mp56	ieu-a-966	Lung cancer || id:ieu-a-966	Television watching (excluded education SNPs)	Weighted median	86	0.55492	0.204684	0.006706	0.153739	0.9561	1.7418	1.16619	2.60153
38	h8Mp56	ieu-a-966	Lung cancer || id:ieu-a-966	Television watching (excluded education SNPs)	Inverse variance weighted	86	0.675397	0.157853	1.88039e-05	0.366005	0.984789	1.96481	1.44196	2.67725
41	h8Mp56	ieu-a-967	Squamous cell lung cancer || id:ieu-a-967	Television watching (excluded education SNPs)	MR Egger	86	0.161581	1.06473	0.879742	-1.92528	2.24845	1.17537	0.145834	9.47301
42	h8Mp56	ieu-a-967	Squamous cell lung cancer || id:ieu-a-967	Television watching (excluded education SNPs)	Weighted median	86	0.52184	0.322039	0.105141	-0.109356	1.15304	1.68513	0.896411	3.1678
43	h8Mp56	ieu-a-967	Squamous cell lung cancer || id:ieu-a-967	Television watching (excluded education SNPs)	Inverse variance weighted	86	0.644507	0.226826	0.00449133	0.199928	1.08908	1.90505	1.22132	2.97155
46	dPzbCf	ieu-a-965	Lung adenocarcinoma || id:ieu-a-965	Television watching (MVMR adjusted for BMI)	MR Egger	78	0.512458	0.955978	0.593485	-1.36126	2.38617	1.66939	0.256338	10.8718
47	dPzbCf	ieu-a-965	Lung adenocarcinoma || id:ieu-a-965	Television watching (MVMR adjusted for BMI)	Weighted median	78	0.590345	0.315181	0.0610633	-0.0274091	1.2081	1.80461	0.972963	3.34712
48	dPzbCf	ieu-a-965	Lung adenocarcinoma || id:ieu-a-965	Television watching (MVMR adjusted for BMI)	Inverse variance weighted	78	0.590519	0.21694	0.00648814	0.165316	1.01572	1.80493	1.17977	2.76136
51	dPzbCf	ieu-a-966	Lung cancer || id:ieu-a-966	Television watching (MVMR adjusted for BMI)	MR Egger	78	0.561305	0.704262	0.427927	-0.819049	1.94166	1.75296	0.440851	6.9703
52	dPzbCf	ieu-a-966	Lung cancer || id:ieu-a-966	Television watching (MVMR adjusted for BMI)	Weighted median	78	0.425656	0.21296	0.0456339	0.00825512	0.843057	1.53059	1.00829	2.32346
53	dPzbCf	ieu-a-966	Lung cancer || id:ieu-a-966	Television watching (MVMR adjusted for BMI)	Inverse variance weighted	78	0.618971	0.159732	0.000106599	0.305896	0.932047	1.85702	1.35784	2.5397
56	dPzbCf	ieu-a-967	Squamous cell lung cancer || id:ieu-a-967	Television watching (MVMR adjusted for BMI)	MR Egger	78	-0.0745206	1.06689	0.944498	-2.16563	2.01659	0.928188	0.114678	7.51266
57	dPzbCf	ieu-a-967	Squamous cell lung cancer || id:ieu-a-967	Television watching (MVMR adjusted for BMI)	Weighted median	78	0.260082	0.327295	0.426823	-0.381417	0.90158	1.29704	0.682893	2.46349
58	dPzbCf	ieu-a-967	Squamous cell lung cancer || id:ieu-a-967	Television watching (MVMR adjusted for BMI)	Inverse variance weighted	78	0.563317	0.243728	0.0208187	0.0856109	1.04102	1.75649	1.08938	2.83211
61	rWtAcu	ieu-a-965	Lung adenocarcinoma || id:ieu-a-965	Television watching (MVMR adjusted for education)	MR Egger	96	0.777845	0.906483	0.393025	-0.998861	2.55455	2.17678	0.368299	12.8655
62	rWtAcu	ieu-a-965	Lung adenocarcinoma || id:ieu-a-965	Television watching (MVMR adjusted for education)	Weighted median	96	0.56382	0.280314	0.0442844	0.0144049	1.11324	1.75737	1.01451	3.04419
63	rWtAcu	ieu-a-965	Lung adenocarcinoma || id:ieu-a-965	Television watching (MVMR adjusted for education)	Inverse variance weighted	96	0.515708	0.195901	0.0084762	0.131741	0.899674	1.67482	1.14081	2.4588
66	rWtAcu	ieu-a-966	Lung cancer || id:ieu-a-966	Television watching (MVMR adjusted for education)	MR Egger	96	0.58341	0.670591	0.38652	-0.730947	1.89777	1.79214	0.481453	6.67099
67	rWtAcu	ieu-a-966	Lung cancer || id:ieu-a-966	Television watching (MVMR adjusted for education)	Weighted median	96	0.531674	0.194384	0.00623473	0.150681	0.912666	1.70178	1.16263	2.49095
68	rWtAcu	ieu-a-966	Lung cancer || id:ieu-a-966	Television watching (MVMR adjusted for education)	Inverse variance weighted	96	0.646223	0.144773	8.05638e-06	0.362466	0.929979	1.90832	1.43687	2.53445
71	rWtAcu	ieu-a-967	Squamous cell lung cancer || id:ieu-a-967	Television watching (MVMR adjusted for education)	MR Egger	96	0.0473922	0.962947	0.960852	-1.83998	1.93477	1.04853	0.15882	6.92244
72	rWtAcu	ieu-a-967	Squamous cell lung cancer || id:ieu-a-967	Television watching (MVMR adjusted for education)	Weighted median	96	0.500728	0.300919	0.0961125	-0.0890721	1.09053	1.64992	0.91478	2.97585
73	rWtAcu	ieu-a-967	Squamous cell lung cancer || id:ieu-a-967	Television watching (MVMR adjusted for education)	Inverse variance weighted	96	0.691693	0.209252	0.000947904	0.281559	1.10183	1.99709	1.32519	3.00966
76	ke4oc1	ieu-a-965	Lung adenocarcinoma || id:ieu-a-965	Computer use (overall)	MR Egger	22	4.58653	3.49546	0.204334	-2.26456	11.4376	98.1531	0.103875	92746.2
77	ke4oc1	ieu-a-965	Lung adenocarcinoma || id:ieu-a-965	Computer use (overall)	Weighted median	22	0.10089	0.574054	0.860491	-1.02426	1.22604	1.10615	0.359064	3.40769
78	ke4oc1	ieu-a-965	Lung adenocarcinoma || id:ieu-a-965	Computer use (overall)	Inverse variance weighted	22	-0.1105	0.411535	0.788308	-0.917109	0.696108	0.895386	0.399673	2.00593
81	ke4oc1	ieu-a-966	Lung cancer || id:ieu-a-966	Computer use (overall)	MR Egger	22	2.26921	2.32589	0.340901	-2.28953	6.82794	9.67172	0.101314	923.288
82	ke4oc1	ieu-a-966	Lung cancer || id:ieu-a-966	Computer use (overall)	Weighted median	22	-0.0716231	0.379744	0.850399	-0.815922	0.672676	0.930882	0.442231	1.95947
83	ke4oc1	ieu-a-966	Lung cancer || id:ieu-a-966	Computer use (overall)	Inverse variance weighted	22	-0.204931	0.278007	0.461036	-0.749825	0.339963	0.814704	0.472449	1.4049
86	ke4oc1	ieu-a-967	Squamous cell lung cancer || id:ieu-a-967	Computer use (overall)	MR Egger	22	1.96811	3.63647	0.594338	-5.15937	9.09559	7.15714	0.00574531	8915.91
87	ke4oc1	ieu-a-967	Squamous cell lung cancer || id:ieu-a-967	Computer use (overall)	Weighted median	22	0.201376	0.572761	0.725147	-0.921235	1.32399	1.22308	0.398027	3.75837
88	ke4oc1	ieu-a-967	Squamous cell lung cancer || id:ieu-a-967	Computer use (overall)	Inverse variance weighted	22	0.0413828	0.428874	0.92313	-0.799211	0.881976	1.04225	0.449684	2.41567
91	1vmbuo	ieu-a-965	Lung adenocarcinoma || id:ieu-a-965	Computer use (excluded pleiotropic SNPs)	MR Egger	19	5.02707	3.51743	0.171068	-1.86708	11.9212	152.486	0.154574	150426
92	1vmbuo	ieu-a-965	Lung adenocarcinoma || id:ieu-a-965	Computer use (excluded pleiotropic SNPs)	Weighted median	19	0.295809	0.586937	0.61427	-0.854587	1.44621	1.34421	0.425459	4.24697
93	1vmbuo	ieu-a-965	Lung adenocarcinoma || id:ieu-a-965	Computer use (excluded pleiotropic SNPs)	Inverse variance weighted	19	0.233144	0.447316	0.602222	-0.643595	1.10988	1.26256	0.5254	3.03401
96	1vmbuo	ieu-a-966	Lung cancer || id:ieu-a-966	Computer use (excluded pleiotropic SNPs)	MR Egger	19	2.91964	2.25447	0.212617	-1.49912	7.33841	18.5347	0.223326	1538.27
97	1vmbuo	ieu-a-966	Lung cancer || id:ieu-a-966	Computer use (excluded pleiotropic SNPs)	Weighted median	19	-0.0439458	0.383028	0.908657	-0.794682	0.70679	0.957006	0.451725	2.02747
98	1vmbuo	ieu-a-966	Lung cancer || id:ieu-a-966	Computer use (excluded pleiotropic SNPs)	Inverse variance weighted	19	0.134931	0.289977	0.641705	-0.433424	0.703286	1.14446	0.648286	2.02038
101	1vmbuo	ieu-a-967	Squamous cell lung cancer || id:ieu-a-967	Computer use (excluded pleiotropic SNPs)	MR Egger	19	2.57029	3.57735	0.482215	-4.44132	9.5819	13.0696	0.0117804	14500
102	1vmbuo	ieu-a-967	Squamous cell lung cancer || id:ieu-a-967	Computer use (excluded pleiotropic SNPs)	Weighted median	19	0.515812	0.615839	0.402269	-0.691233	1.72286	1.675	0.500958	5.6005
103	1vmbuo	ieu-a-967	Squamous cell lung cancer || id:ieu-a-967	Computer use (excluded pleiotropic SNPs)	Inverse variance weighted	19	0.260636	0.456275	0.567847	-0.633663	1.15493	1.29775	0.530644	3.17382
106	fQCsJ0	ieu-a-965	Lung adenocarcinoma || id:ieu-a-965	Computer use (excluded education SNPs)	MR Egger	21	5.09683	3.50371	0.162075	-1.77043	11.9641	163.503	0.17026	157015
107	fQCsJ0	ieu-a-965	Lung adenocarcinoma || id:ieu-a-965	Computer use (excluded education SNPs)	Weighted median	21	0.228785	0.56336	0.684663	-0.8754	1.33297	1.25707	0.416695	3.79229
108	fQCsJ0	ieu-a-965	Lung adenocarcinoma || id:ieu-a-965	Computer use (excluded education SNPs)	Inverse variance weighted	21	0.0927739	0.423126	0.826449	-0.736553	0.922101	1.09721	0.478761	2.51457
111	fQCsJ0	ieu-a-966	Lung cancer || id:ieu-a-966	Computer use (excluded education SNPs)	MR Egger	21	2.74655	2.2461	0.236352	-1.6558	7.1489	15.5888	0.19094	1272.71
112	fQCsJ0	ieu-a-966	Lung cancer || id:ieu-a-966	Computer use (excluded education SNPs)	Weighted median	21	-0.0660018	0.36546	0.856682	-0.782304	0.6503	0.936129	0.457351	1.91612
113	fQCsJ0	ieu-a-966	Lung cancer || id:ieu-a-966	Computer use (excluded education SNPs)	Inverse variance weighted	21	-0.00459563	0.274459	0.986641	-0.542536	0.533345	0.995415	0.581272	1.70462
116	fQCsJ0	ieu-a-967	Squamous cell lung cancer || id:ieu-a-967	Computer use (excluded education SNPs)	MR Egger	21	2.39375	3.40524	0.490606	-4.28053	9.06802	10.9545	0.0138353	8673.46
117	fQCsJ0	ieu-a-967	Squamous cell lung cancer || id:ieu-a-967	Computer use (excluded education SNPs)	Weighted median	21	0.477087	0.564026	0.397631	-0.628404	1.58258	1.61137	0.533443	4.86749
118	fQCsJ0	ieu-a-967	Squamous cell lung cancer || id:ieu-a-967	Computer use (excluded education SNPs)	Inverse variance weighted	21	0.229633	0.417803	0.58258	-0.589261	1.04853	1.25814	0.554737	2.85344
121	rWtAcu	ieu-a-965	Lung adenocarcinoma || id:ieu-a-965	Computer use (MVMR adjusted for education)	MR Egger	20	4.97403	3.56199	0.179572	-2.00748	11.9555	144.608	0.134327	155675
122	rWtAcu	ieu-a-965	Lung adenocarcinoma || id:ieu-a-965	Computer use (MVMR adjusted for education)	Weighted median	20	0.0982081	0.610346	0.872168	-1.09807	1.29449	1.10319	0.333514	3.64912
123	rWtAcu	ieu-a-965	Lung adenocarcinoma || id:ieu-a-965	Computer use (MVMR adjusted for education)	Inverse variance weighted	20	-0.164994	0.428068	0.699913	-1.00401	0.67402	0.847899	0.366408	1.96211
126	rWtAcu	ieu-a-966	Lung cancer || id:ieu-a-966	Computer use (MVMR adjusted for education)	MR Egger	20	2.36034	2.48611	0.354986	-2.51244	7.23312	10.5945	0.0810701	1384.53
127	rWtAcu	ieu-a-966	Lung cancer || id:ieu-a-966	Computer use (MVMR adjusted for education)	Weighted median	20	-0.0639005	0.389463	0.869673	-0.827247	0.699446	0.938098	0.437251	2.01264
128	rWtAcu	ieu-a-966	Lung cancer || id:ieu-a-966	Computer use (MVMR adjusted for education)	Inverse variance weighted	20	-0.188174	0.302967	0.534531	-0.781989	0.405641	0.828471	0.457495	1.50026
131	rWtAcu	ieu-a-967	Squamous cell lung cancer || id:ieu-a-967	Computer use (MVMR adjusted for education)	MR Egger	20	2.23527	3.86647	0.570349	-5.34302	9.81356	9.34899	0.00478141	18279.9
132	rWtAcu	ieu-a-967	Squamous cell lung cancer || id:ieu-a-967	Computer use (MVMR adjusted for education)	Weighted median	20	0.178467	0.595096	0.764256	-0.987921	1.34486	1.19538	0.37235	3.83763
133	rWtAcu	ieu-a-967	Squamous cell lung cancer || id:ieu-a-967	Computer use (MVMR adjusted for education)	Inverse variance weighted	20	0.0395399	0.46502	0.932239	-0.8719	0.95098	1.04033	0.418156	2.58824
136	62nLnq	ieu-a-965	Lung adenocarcinoma || id:ieu-a-965	Driving (overall)	MR Egger	4	1.98098	7.8054	0.823361	-13.3176	17.2796	7.24985	1.64528e-06	3.1946e+07
137	62nLnq	ieu-a-965	Lung adenocarcinoma || id:ieu-a-965	Driving (overall)	Weighted median	4	0.643224	1.12402	0.567149	-1.55985	2.8463	1.90261	0.210168	17.2239
138	62nLnq	ieu-a-965	Lung adenocarcinoma || id:ieu-a-965	Driving (overall)	Inverse variance weighted	4	0.282977	0.982994	0.773444	-1.64369	2.20965	1.32708	0.193265	9.11248
141	62nLnq	ieu-a-966	Lung cancer || id:ieu-a-966	Driving (overall)	MR Egger	4	-2.01431	6.06678	0.771439	-13.9052	9.87658	0.133412	9.1421e-07	19469.1
142	62nLnq	ieu-a-966	Lung cancer || id:ieu-a-966	Driving (overall)	Weighted median	4	0.221829	0.72827	0.760673	-1.20558	1.64924	1.24836	0.299518	5.20301
143	62nLnq	ieu-a-966	Lung cancer || id:ieu-a-966	Driving (overall)	Inverse variance weighted	4	0.0165392	0.647743	0.979629	-1.25304	1.28612	1.01668	0.285636	3.6187
146	62nLnq	ieu-a-967	Squamous cell lung cancer || id:ieu-a-967	Driving (overall)	MR Egger	4	3.25796	13.9069	0.836574	-23.9996	30.5155	25.9964	3.77661e-11	1.78947e+13
147	62nLnq	ieu-a-967	Squamous cell lung cancer || id:ieu-a-967	Driving (overall)	Weighted median	4	0.647607	1.18417	0.584457	-1.67337	2.96858	1.91096	0.187614	19.4643
148	62nLnq	ieu-a-967	Squamous cell lung cancer || id:ieu-a-967	Driving (overall)	Inverse variance weighted	4	0.019358	1.43732	0.989254	-2.79779	2.8365	1.01955	0.0609449	17.056
151	WpcEti	ieu-a-965	Lung adenocarcinoma || id:ieu-a-965	Driving (excluded pleiotropic SNPs)	Inverse variance weighted	2	-0.158002	1.41345	0.910995	-2.92837	2.61237	0.853848	0.0534841	13.6313
152	WpcEti	ieu-a-966	Lung cancer || id:ieu-a-966	Driving (excluded pleiotropic SNPs)	Inverse variance weighted	2	-0.204783	1.42039	0.885363	-2.98875	2.57918	0.814825	0.0503505	13.1863
153	WpcEti	ieu-a-967	Squamous cell lung cancer || id:ieu-a-967	Driving (excluded pleiotropic SNPs)	Inverse variance weighted	2	-0.604495	3.40237	0.858983	-7.27313	6.06414	0.54635	0.000693934	430.154
154	By3Jgj	ieu-a-965	Lung adenocarcinoma || id:ieu-a-965	Driving (excluded education SNPs)	Weighted median	3	0.65281	1.38813	0.638156	-2.06793	3.37355	1.92093	0.126447	29.182
155	By3Jgj	ieu-a-965	Lung adenocarcinoma || id:ieu-a-965	Driving (excluded education SNPs)	Inverse variance weighted	3	0.1497	1.15571	0.896938	-2.11549	2.41489	1.16149	0.120574	11.1886
158	By3Jgj	ieu-a-966	Lung cancer || id:ieu-a-966	Driving (excluded education SNPs)	Weighted median	3	0.973635	0.996684	0.328631	-0.979865	2.92713	2.64755	0.375362	18.674
159	By3Jgj	ieu-a-966	Lung cancer || id:ieu-a-966	Driving (excluded education SNPs)	Inverse variance weighted	3	0.180512	0.911869	0.843078	-1.60675	1.96778	1.19783	0.200538	7.15475
162	By3Jgj	ieu-a-967	Squamous cell lung cancer || id:ieu-a-967	Driving (excluded education SNPs)	Weighted median	3	0.616739	1.67751	0.713132	-2.67117	3.90465	1.85288	0.0691711	49.6328
163	By3Jgj	ieu-a-967	Squamous cell lung cancer || id:ieu-a-967	Driving (excluded education SNPs)	Inverse variance weighted	3	-0.228842	2.03322	0.910386	-4.21395	3.75626	0.795454	0.0147879	42.7882
166	brG71s	ieu-a-965	Lung adenocarcinoma || id:ieu-a-965	Driving (MVMR adjusted for education)	MR Egger	3	2.84254	8.13116	0.785901	-13.0945	18.7796	17.1594	2.05645e-06	1.43181e+08
167	brG71s	ieu-a-965	Lung adenocarcinoma || id:ieu-a-965	Driving (MVMR adjusted for education)	Weighted median	3	0.631693	1.35925	0.642121	-2.03244	3.29583	1.88079	0.131015	26.9998
168	brG71s	ieu-a-965	Lung adenocarcinoma || id:ieu-a-965	Driving (MVMR adjusted for education)	Inverse variance weighted	3	0.129252	1.12741	0.908727	-2.08047	2.33898	1.13798	0.124871	10.3706
171	brG71s	ieu-a-966	Lung cancer || id:ieu-a-966	Driving (MVMR adjusted for education)	MR Egger	3	-0.935487	8.07878	0.926609	-16.7699	14.8989	0.392395	5.21102e-08	2.95477e+06
172	brG71s	ieu-a-966	Lung cancer || id:ieu-a-966	Driving (MVMR adjusted for education)	Weighted median	3	-0.394363	0.939822	0.674767	-2.23642	1.44769	0.674109	0.106841	4.25327
173	brG71s	ieu-a-966	Lung cancer || id:ieu-a-966	Driving (MVMR adjusted for education)	Inverse variance weighted	3	-0.27607	0.799432	0.729844	-1.84296	1.29082	0.75876	0.158348	3.63575
176	brG71s	ieu-a-967	Squamous cell lung cancer || id:ieu-a-967	Driving (MVMR adjusted for education)	MR Egger	3	4.30979	20.0164	0.864989	-34.9223	43.5419	74.4245	6.81447e-16	8.12831e+18
177	brG71s	ieu-a-967	Squamous cell lung cancer || id:ieu-a-967	Driving (MVMR adjusted for education)	Weighted median	3	0.705862	1.62976	0.664937	-2.48847	3.90019	2.02559	0.0830371	49.4119
178	brG71s	ieu-a-967	Squamous cell lung cancer || id:ieu-a-967	Driving (MVMR adjusted for education)	Inverse variance weighted	3	-0.151352	1.98753	0.939299	-4.04691	3.74421	0.859545	0.0174762	42.2756
SNP: single nucleotide polymorphism, b: beta, se: standard error, or: odds ratio, p: p-value, id: identification.

## Sheet: Supplementary table 4
Supplementary table 4. Single SNP Wald ratio result for SNP related to leisure sedentary behaviors and risk of lung cancer with subtypes.
	exposure	outcome	id.exposure	id.outcome	samplesize	SNP	b	se	p
1	Television watching (overall)	Lung adenocarcinoma || id:ieu-a-965	HTIJzT	ieu-a-965	18336	rs10041724	4.37085	1.77656	0.0138823
2	Television watching (overall)	Lung adenocarcinoma || id:ieu-a-965	HTIJzT	ieu-a-965	18336	rs10054327	-0.440873	1.65859	0.790384
3	Television watching (overall)	Lung adenocarcinoma || id:ieu-a-965	HTIJzT	ieu-a-965	18336	rs10189857	0.984545	1.41565	0.48676
4	Television watching (overall)	Lung adenocarcinoma || id:ieu-a-965	HTIJzT	ieu-a-965	18336	rs1031423	-0.601811	1.83268	0.742627
5	Television watching (overall)	Lung adenocarcinoma || id:ieu-a-965	HTIJzT	ieu-a-965	18336	rs10771746	6.1526	2.35957	0.00912041
6	Television watching (overall)	Lung adenocarcinoma || id:ieu-a-965	HTIJzT	ieu-a-965	18336	rs10772643	-2.33013	1.66676	0.162114
7	Television watching (overall)	Lung adenocarcinoma || id:ieu-a-965	HTIJzT	ieu-a-965	18336	rs10876864	-0.0701987	2.137	0.973795
8	Television watching (overall)	Lung adenocarcinoma || id:ieu-a-965	HTIJzT	ieu-a-965	18336	rs10932837	0.576152	2.077	0.781476
9	Television watching (overall)	Lung adenocarcinoma || id:ieu-a-965	HTIJzT	ieu-a-965	18336	rs10947452	-1.41449	2.03407	0.486807
10	Television watching (overall)	Lung adenocarcinoma || id:ieu-a-965	HTIJzT	ieu-a-965	18336	rs11130793	1.59504	2.11092	0.449882
11	Television watching (overall)	Lung adenocarcinoma || id:ieu-a-965	HTIJzT	ieu-a-965	18336	rs111901094	-3.34977	2.39182	0.161361
12	Television watching (overall)	Lung adenocarcinoma || id:ieu-a-965	HTIJzT	ieu-a-965	18336	rs11218575	0.777587	1.85453	0.675004
13	Television watching (overall)	Lung adenocarcinoma || id:ieu-a-965	HTIJzT	ieu-a-965	18336	rs11245482	1.52698	2.21677	0.49093
14	Television watching (overall)	Lung adenocarcinoma || id:ieu-a-965	HTIJzT	ieu-a-965	18336	rs114720649	-0.531256	2.5745	0.836515
15	Television watching (overall)	Lung adenocarcinoma || id:ieu-a-965	HTIJzT	ieu-a-965	18336	rs11689199	2.96085	1.49361	0.0474408
16	Television watching (overall)	Lung adenocarcinoma || id:ieu-a-965	HTIJzT	ieu-a-965	18336	rs11714337	-0.397037	2.00379	0.842933
17	Television watching (overall)	Lung adenocarcinoma || id:ieu-a-965	HTIJzT	ieu-a-965	18336	rs11917871	0.298639	1.66147	0.857354
18	Television watching (overall)	Lung adenocarcinoma || id:ieu-a-965	HTIJzT	ieu-a-965	18336	rs12105701	1.84015	2.10415	0.38183
19	Television watching (overall)	Lung adenocarcinoma || id:ieu-a-965	HTIJzT	ieu-a-965	18336	rs12342024	0.907348	2.0911	0.664354
20	Television watching (overall)	Lung adenocarcinoma || id:ieu-a-965	HTIJzT	ieu-a-965	18336	rs1243182	2.15491	1.58842	0.174897
21	Television watching (overall)	Lung adenocarcinoma || id:ieu-a-965	HTIJzT	ieu-a-965	18336	rs12491503	1.22473	2.08879	0.55765
22	Television watching (overall)	Lung adenocarcinoma || id:ieu-a-965	HTIJzT	ieu-a-965	18336	rs12554512	-0.467837	1.40514	0.739175
23	Television watching (overall)	Lung adenocarcinoma || id:ieu-a-965	HTIJzT	ieu-a-965	18336	rs13107325	0.827914	1.76845	0.639671
24	Television watching (overall)	Lung adenocarcinoma || id:ieu-a-965	HTIJzT	ieu-a-965	18336	rs1451533	0.555834	2.00294	0.781389
25	Television watching (overall)	Lung adenocarcinoma || id:ieu-a-965	HTIJzT	ieu-a-965	18336	rs148544378	0.45383	2.37215	0.848278
26	Television watching (overall)	Lung adenocarcinoma || id:ieu-a-965	HTIJzT	ieu-a-965	18336	rs148648822	-3.11711	2.15389	0.147841
27	Television watching (overall)	Lung adenocarcinoma || id:ieu-a-965	HTIJzT	ieu-a-965	18336	rs17207890	4.82822	1.684	0.00414235
28	Television watching (overall)	Lung adenocarcinoma || id:ieu-a-965	HTIJzT	ieu-a-965	18336	rs17727474	3.0521	1.8745	0.103478
29	Television watching (overall)	Lung adenocarcinoma || id:ieu-a-965	HTIJzT	ieu-a-965	18336	rs17789218	-0.907653	1.738	0.601503
30	Television watching (overall)	Lung adenocarcinoma || id:ieu-a-965	HTIJzT	ieu-a-965	18336	rs182355396	2.74409	1.9552	0.160473
31	Television watching (overall)	Lung adenocarcinoma || id:ieu-a-965	HTIJzT	ieu-a-965	18336	rs1913808	-0.00966593	1.97173	0.996089
32	Television watching (overall)	Lung adenocarcinoma || id:ieu-a-965	HTIJzT	ieu-a-965	18336	rs2034768	1.07889	1.87	0.563977
33	Television watching (overall)	Lung adenocarcinoma || id:ieu-a-965	HTIJzT	ieu-a-965	18336	rs2045147	0.272977	2.11885	0.89749
34	Television watching (overall)	Lung adenocarcinoma || id:ieu-a-965	HTIJzT	ieu-a-965	18336	rs2073869	-1.39898	1.88195	0.457259
35	Television watching (overall)	Lung adenocarcinoma || id:ieu-a-965	HTIJzT	ieu-a-965	18336	rs2173650	0.665528	2.17617	0.759737
36	Television watching (overall)	Lung adenocarcinoma || id:ieu-a-965	HTIJzT	ieu-a-965	18336	rs2184364	3.81384	1.972	0.0531134
37	Television watching (overall)	Lung adenocarcinoma || id:ieu-a-965	HTIJzT	ieu-a-965	18336	rs2291681	-0.258182	2.13569	0.903779
38	Television watching (overall)	Lung adenocarcinoma || id:ieu-a-965	HTIJzT	ieu-a-965	18336	rs2447098	0.594577	1.8442	0.747147
39	Television watching (overall)	Lung adenocarcinoma || id:ieu-a-965	HTIJzT	ieu-a-965	18336	rs2460	-3.59494	2.03633	0.0774968
40	Television watching (overall)	Lung adenocarcinoma || id:ieu-a-965	HTIJzT	ieu-a-965	18336	rs2584597	-1.16797	2.1512	0.587171
41	Television watching (overall)	Lung adenocarcinoma || id:ieu-a-965	HTIJzT	ieu-a-965	18336	rs2616830	0.918963	1.73356	0.596042
42	Television watching (overall)	Lung adenocarcinoma || id:ieu-a-965	HTIJzT	ieu-a-965	18336	rs262890	1.41548	1.63895	0.38778
43	Television watching (overall)	Lung adenocarcinoma || id:ieu-a-965	HTIJzT	ieu-a-965	18336	rs263771	1.20211	2.04888	0.557396
44	Television watching (overall)	Lung adenocarcinoma || id:ieu-a-965	HTIJzT	ieu-a-965	18336	rs2971640	2.81902	2.17323	0.194578
45	Television watching (overall)	Lung adenocarcinoma || id:ieu-a-965	HTIJzT	ieu-a-965	18336	rs303753	0.282014	2.07507	0.891896
46	Television watching (overall)	Lung adenocarcinoma || id:ieu-a-965	HTIJzT	ieu-a-965	18336	rs34811474	-0.881347	2.86913	0.758705
47	Television watching (overall)	Lung adenocarcinoma || id:ieu-a-965	HTIJzT	ieu-a-965	18336	rs34864022	-0.340425	2.14846	0.874102
48	Television watching (overall)	Lung adenocarcinoma || id:ieu-a-965	HTIJzT	ieu-a-965	18336	rs374722	0.450842	1.58796	0.776477
49	Television watching (overall)	Lung adenocarcinoma || id:ieu-a-965	HTIJzT	ieu-a-965	18336	rs3754970	-3.39918	1.93513	0.0789926
50	Television watching (overall)	Lung adenocarcinoma || id:ieu-a-965	HTIJzT	ieu-a-965	18336	rs3796386	1.39549	1.1035	0.206014
51	Television watching (overall)	Lung adenocarcinoma || id:ieu-a-965	HTIJzT	ieu-a-965	18336	rs4382592	2.40354	2.16943	0.2679
52	Television watching (overall)	Lung adenocarcinoma || id:ieu-a-965	HTIJzT	ieu-a-965	18336	rs4577309	2.79631	1.78869	0.117975
53	Television watching (overall)	Lung adenocarcinoma || id:ieu-a-965	HTIJzT	ieu-a-965	18336	rs4845364	1.41961	1.79	0.427733
54	Television watching (overall)	Lung adenocarcinoma || id:ieu-a-965	HTIJzT	ieu-a-965	18336	rs4973576	0.123181	2.0482	0.952043
55	Television watching (overall)	Lung adenocarcinoma || id:ieu-a-965	HTIJzT	ieu-a-965	18336	rs553397860	-0.699006	2.25782	0.756871
56	Television watching (overall)	Lung adenocarcinoma || id:ieu-a-965	HTIJzT	ieu-a-965	18336	rs56103247	3.04694	2.1787	0.161959
57	Television watching (overall)	Lung adenocarcinoma || id:ieu-a-965	HTIJzT	ieu-a-965	18336	rs56398417	-1.45529	2.24986	0.517739
58	Television watching (overall)	Lung adenocarcinoma || id:ieu-a-965	HTIJzT	ieu-a-965	18336	rs56858768	0.380578	2.03113	0.851369
59	Television watching (overall)	Lung adenocarcinoma || id:ieu-a-965	HTIJzT	ieu-a-965	18336	rs57585211	2.55336	2.23588	0.253458
60	Television watching (overall)	Lung adenocarcinoma || id:ieu-a-965	HTIJzT	ieu-a-965	18336	rs6131281	-1.71044	1.78506	0.337963
61	Television watching (overall)	Lung adenocarcinoma || id:ieu-a-965	HTIJzT	ieu-a-965	18336	rs6141814	0.400163	2.02993	0.843725
62	Television watching (overall)	Lung adenocarcinoma || id:ieu-a-965	HTIJzT	ieu-a-965	18336	rs62332760	-0.234671	2.02507	0.907746
63	Television watching (overall)	Lung adenocarcinoma || id:ieu-a-965	HTIJzT	ieu-a-965	18336	rs62379379	3.22395	2.26942	0.155433
64	Television watching (overall)	Lung adenocarcinoma || id:ieu-a-965	HTIJzT	ieu-a-965	18336	rs62641636	1.90804	2.18329	0.382155
65	Television watching (overall)	Lung adenocarcinoma || id:ieu-a-965	HTIJzT	ieu-a-965	18336	rs6472942	-0.815462	2.09685	0.697351
66	Television watching (overall)	Lung adenocarcinoma || id:ieu-a-965	HTIJzT	ieu-a-965	18336	rs648044	3.34901	2.13264	0.116332
67	Television watching (overall)	Lung adenocarcinoma || id:ieu-a-965	HTIJzT	ieu-a-965	18336	rs6673341	2.11665	1.7656	0.230596
68	Television watching (overall)	Lung adenocarcinoma || id:ieu-a-965	HTIJzT	ieu-a-965	18336	rs66852340	1.61469	1.89389	0.393891
69	Television watching (overall)	Lung adenocarcinoma || id:ieu-a-965	HTIJzT	ieu-a-965	18336	rs6721975	0.6601	2.05512	0.74806
70	Television watching (overall)	Lung adenocarcinoma || id:ieu-a-965	HTIJzT	ieu-a-965	18336	rs6797840	0.147173	1.70719	0.931301
71	Television watching (overall)	Lung adenocarcinoma || id:ieu-a-965	HTIJzT	ieu-a-965	18336	rs6825241	1.09654	1.63706	0.50297
72	Television watching (overall)	Lung adenocarcinoma || id:ieu-a-965	HTIJzT	ieu-a-965	18336	rs6850494	2.95893	2.11943	0.162685
73	Television watching (overall)	Lung adenocarcinoma || id:ieu-a-965	HTIJzT	ieu-a-965	18336	rs6905544	-2.13116	1.54537	0.167876
74	Television watching (overall)	Lung adenocarcinoma || id:ieu-a-965	HTIJzT	ieu-a-965	18336	rs7184800	-0.563586	1.76335	0.749264
75	Television watching (overall)	Lung adenocarcinoma || id:ieu-a-965	HTIJzT	ieu-a-965	18336	rs7189927	1.59595	1.99253	0.423153
76	Television watching (overall)	Lung adenocarcinoma || id:ieu-a-965	HTIJzT	ieu-a-965	18336	rs7248205	-0.177864	2.09157	0.932231
77	Television watching (overall)	Lung adenocarcinoma || id:ieu-a-965	HTIJzT	ieu-a-965	18336	rs72725224	-1.6226	2.02443	0.422838
78	Television watching (overall)	Lung adenocarcinoma || id:ieu-a-965	HTIJzT	ieu-a-965	18336	rs72781699	0.651163	1.82626	0.721425
79	Television watching (overall)	Lung adenocarcinoma || id:ieu-a-965	HTIJzT	ieu-a-965	18336	rs72828890	0.762068	2.47426	0.758084
80	Television watching (overall)	Lung adenocarcinoma || id:ieu-a-965	HTIJzT	ieu-a-965	18336	rs72834698	1.4736	1.72839	0.393888
81	Television watching (overall)	Lung adenocarcinoma || id:ieu-a-965	HTIJzT	ieu-a-965	18336	rs74802478	2.15365	2.10224	0.305619
82	Television watching (overall)	Lung adenocarcinoma || id:ieu-a-965	HTIJzT	ieu-a-965	18336	rs749671	0.297959	1.75956	0.865531
83	Television watching (overall)	Lung adenocarcinoma || id:ieu-a-965	HTIJzT	ieu-a-965	18336	rs7564130	0.581721	1.8874	0.75792
84	Television watching (overall)	Lung adenocarcinoma || id:ieu-a-965	HTIJzT	ieu-a-965	18336	rs7693703	-2.92737	2.1007	0.163461
85	Television watching (overall)	Lung adenocarcinoma || id:ieu-a-965	HTIJzT	ieu-a-965	18336	rs7716447	-1.07837	2.833	0.703466
86	Television watching (overall)	Lung adenocarcinoma || id:ieu-a-965	HTIJzT	ieu-a-965	18336	rs7788008	-2.86691	2.20146	0.192822
87	Television watching (overall)	Lung adenocarcinoma || id:ieu-a-965	HTIJzT	ieu-a-965	18336	rs7834121	2.67044	1.94657	0.170104
88	Television watching (overall)	Lung adenocarcinoma || id:ieu-a-965	HTIJzT	ieu-a-965	18336	rs78394231	0.0856371	2.16848	0.968498
89	Television watching (overall)	Lung adenocarcinoma || id:ieu-a-965	HTIJzT	ieu-a-965	18336	rs801733	-2.45014	1.75012	0.161517
90	Television watching (overall)	Lung adenocarcinoma || id:ieu-a-965	HTIJzT	ieu-a-965	18336	rs8756	-1.39693	2.14854	0.515578
91	Television watching (overall)	Lung adenocarcinoma || id:ieu-a-965	HTIJzT	ieu-a-965	18336	rs9471333	0.551785	2.125	0.795123
92	Television watching (overall)	Lung adenocarcinoma || id:ieu-a-965	HTIJzT	ieu-a-965	18336	rs9563168	-2.24097	1.91928	0.242964
93	Television watching (overall)	Lung adenocarcinoma || id:ieu-a-965	HTIJzT	ieu-a-965	18336	rs9569734	1.33306	1.95153	0.494553
94	Television watching (overall)	Lung adenocarcinoma || id:ieu-a-965	HTIJzT	ieu-a-965	18336	rs9834970	-2.56625	2.16	0.234802
95	Television watching (overall)	Lung adenocarcinoma || id:ieu-a-965	HTIJzT	ieu-a-965	18336	rs984409	-0.041587	1.9014	0.98255
96	Television watching (overall)	Lung adenocarcinoma || id:ieu-a-965	HTIJzT	ieu-a-965	18336	rs9867121	-1.15966	1.938	0.549587
97	Television watching (overall)	Lung adenocarcinoma || id:ieu-a-965	HTIJzT	ieu-a-965	18336	rs9902312	-1.14465	1.9452	0.55623
98	Television watching (overall)	Lung adenocarcinoma || id:ieu-a-965	HTIJzT	ieu-a-965	18336	rs9964724	0.0379315	1.623	0.981354
99	Television watching (overall)	Lung adenocarcinoma || id:ieu-a-965	HTIJzT	ieu-a-965	18336	All - Inverse variance weighted	0.492255	0.193656	0.0110251
100	Television watching (overall)	Lung adenocarcinoma || id:ieu-a-965	HTIJzT	ieu-a-965	18336	All - MR Egger	0.728081	0.903116	0.422127
101	Television watching (overall)	Lung cancer || id:ieu-a-966	HTIJzT	ieu-a-966	27209	rs10041724	1.70008	1.21389	0.161356
102	Television watching (overall)	Lung cancer || id:ieu-a-966	HTIJzT	ieu-a-966	27209	rs10054327	0.0523174	1.07159	0.961061
103	Television watching (overall)	Lung cancer || id:ieu-a-966	HTIJzT	ieu-a-966	27209	rs10189857	1.66206	0.9288	0.0735382
104	Television watching (overall)	Lung cancer || id:ieu-a-966	HTIJzT	ieu-a-966	27209	rs1031423	-1.33718	1.23205	0.277775
105	Television watching (overall)	Lung cancer || id:ieu-a-966	HTIJzT	ieu-a-966	27209	rs10771746	2.73861	1.46907	0.062297
106	Television watching (overall)	Lung cancer || id:ieu-a-966	HTIJzT	ieu-a-966	27209	rs10772643	0.43202	1.13712	0.704001
107	Television watching (overall)	Lung cancer || id:ieu-a-966	HTIJzT	ieu-a-966	27209	rs10876864	2.3025	1.35185	0.0885257
108	Television watching (overall)	Lung cancer || id:ieu-a-966	HTIJzT	ieu-a-966	27209	rs10932837	0.0812738	1.36738	0.952604
109	Television watching (overall)	Lung cancer || id:ieu-a-966	HTIJzT	ieu-a-966	27209	rs10947452	0.0514101	1.36171	0.969884
110	Television watching (overall)	Lung cancer || id:ieu-a-966	HTIJzT	ieu-a-966	27209	rs11130793	-0.0159983	1.40238	0.990898
111	Television watching (overall)	Lung cancer || id:ieu-a-966	HTIJzT	ieu-a-966	27209	rs111901094	-1.62506	1.61647	0.314744
112	Television watching (overall)	Lung cancer || id:ieu-a-966	HTIJzT	ieu-a-966	27209	rs11218575	1.73135	1.1934	0.146843
113	Television watching (overall)	Lung cancer || id:ieu-a-966	HTIJzT	ieu-a-966	27209	rs11245482	1.37684	1.44338	0.340136
114	Television watching (overall)	Lung cancer || id:ieu-a-966	HTIJzT	ieu-a-966	27209	rs114720649	-1.34159	1.66643	0.420779
115	Television watching (overall)	Lung cancer || id:ieu-a-966	HTIJzT	ieu-a-966	27209	rs11689199	-0.00794389	1.02072	0.99379
116	Television watching (overall)	Lung cancer || id:ieu-a-966	HTIJzT	ieu-a-966	27209	rs11714337	-0.105422	1.29571	0.935154
117	Television watching (overall)	Lung cancer || id:ieu-a-966	HTIJzT	ieu-a-966	27209	rs11917871	-0.294848	1.09882	0.788445
118	Television watching (overall)	Lung cancer || id:ieu-a-966	HTIJzT	ieu-a-966	27209	rs12105701	2.90685	1.36623	0.0333665
119	Television watching (overall)	Lung cancer || id:ieu-a-966	HTIJzT	ieu-a-966	27209	rs12342024	0.541338	1.33681	0.685516
120	Television watching (overall)	Lung cancer || id:ieu-a-966	HTIJzT	ieu-a-966	27209	rs1243182	0.531205	1.00626	0.597569
121	Television watching (overall)	Lung cancer || id:ieu-a-966	HTIJzT	ieu-a-966	27209	rs12491503	1.22494	1.36457	0.369361
122	Television watching (overall)	Lung cancer || id:ieu-a-966	HTIJzT	ieu-a-966	27209	rs12554512	0.344769	0.897667	0.700925
123	Television watching (overall)	Lung cancer || id:ieu-a-966	HTIJzT	ieu-a-966	27209	rs13107325	1.59778	1.22497	0.192115
124	Television watching (overall)	Lung cancer || id:ieu-a-966	HTIJzT	ieu-a-966	27209	rs1451533	1.30203	1.30412	0.318088
125	Television watching (overall)	Lung cancer || id:ieu-a-966	HTIJzT	ieu-a-966	27209	rs148544378	1.19908	1.51749	0.429426
126	Television watching (overall)	Lung cancer || id:ieu-a-966	HTIJzT	ieu-a-966	27209	rs148648822	-0.43716	1.45928	0.764503
127	Television watching (overall)	Lung cancer || id:ieu-a-966	HTIJzT	ieu-a-966	27209	rs17207890	3.13594	1.13456	0.00570965
128	Television watching (overall)	Lung cancer || id:ieu-a-966	HTIJzT	ieu-a-966	27209	rs17727474	1.80897	1.25211	0.148533
129	Television watching (overall)	Lung cancer || id:ieu-a-966	HTIJzT	ieu-a-966	27209	rs17789218	0.600784	1.11284	0.58929
130	Television watching (overall)	Lung cancer || id:ieu-a-966	HTIJzT	ieu-a-966	27209	rs182355396	1.54564	1.1908	0.194293
131	Television watching (overall)	Lung cancer || id:ieu-a-966	HTIJzT	ieu-a-966	27209	rs1913808	-0.585224	1.29473	0.651266
132	Television watching (overall)	Lung cancer || id:ieu-a-966	HTIJzT	ieu-a-966	27209	rs2034768	0.275364	1.2036	0.819037
133	Television watching (overall)	Lung cancer || id:ieu-a-966	HTIJzT	ieu-a-966	27209	rs2045147	2.89832	1.43131	0.0428727
134	Television watching (overall)	Lung cancer || id:ieu-a-966	HTIJzT	ieu-a-966	27209	rs2073869	0.182315	1.18611	0.877839
135	Television watching (overall)	Lung cancer || id:ieu-a-966	HTIJzT	ieu-a-966	27209	rs2173650	1.64454	1.4135	0.244645
136	Television watching (overall)	Lung cancer || id:ieu-a-966	HTIJzT	ieu-a-966	27209	rs2184364	0.666412	1.33794	0.618421
137	Television watching (overall)	Lung cancer || id:ieu-a-966	HTIJzT	ieu-a-966	27209	rs2291681	0.370429	1.383	0.788819
138	Television watching (overall)	Lung cancer || id:ieu-a-966	HTIJzT	ieu-a-966	27209	rs2447098	2.25656	1.1728	0.0543447
139	Television watching (overall)	Lung cancer || id:ieu-a-966	HTIJzT	ieu-a-966	27209	rs2460	-3.42643	1.3272	0.00983148
140	Television watching (overall)	Lung cancer || id:ieu-a-966	HTIJzT	ieu-a-966	27209	rs2584597	0.00220003	1.37547	0.998724
141	Television watching (overall)	Lung cancer || id:ieu-a-966	HTIJzT	ieu-a-966	27209	rs2616830	0.211517	1.11981	0.850182
142	Television watching (overall)	Lung cancer || id:ieu-a-966	HTIJzT	ieu-a-966	27209	rs262890	2.03286	1.06668	0.056679
143	Television watching (overall)	Lung cancer || id:ieu-a-966	HTIJzT	ieu-a-966	27209	rs263771	1.96044	1.33065	0.140672
144	Television watching (overall)	Lung cancer || id:ieu-a-966	HTIJzT	ieu-a-966	27209	rs2971640	2.88721	1.417	0.041595
145	Television watching (overall)	Lung cancer || id:ieu-a-966	HTIJzT	ieu-a-966	27209	rs303753	2.17525	1.388	0.117072
146	Television watching (overall)	Lung cancer || id:ieu-a-966	HTIJzT	ieu-a-966	27209	rs34811474	2.82954	1.7652	0.108944
147	Television watching (overall)	Lung cancer || id:ieu-a-966	HTIJzT	ieu-a-966	27209	rs34864022	0.0965712	1.41727	0.945675
148	Television watching (overall)	Lung cancer || id:ieu-a-966	HTIJzT	ieu-a-966	27209	rs374722	0.273558	1.03846	0.792221
149	Television watching (overall)	Lung cancer || id:ieu-a-966	HTIJzT	ieu-a-966	27209	rs3754970	-0.646125	1.2034	0.591325
150	Television watching (overall)	Lung cancer || id:ieu-a-966	HTIJzT	ieu-a-966	27209	rs3796386	1.00453	0.712846	0.158779
151	Television watching (overall)	Lung cancer || id:ieu-a-966	HTIJzT	ieu-a-966	27209	rs4382592	3.22501	1.44179	0.0252981
152	Television watching (overall)	Lung cancer || id:ieu-a-966	HTIJzT	ieu-a-966	27209	rs4577309	3.63532	1.18175	0.00209646
153	Television watching (overall)	Lung cancer || id:ieu-a-966	HTIJzT	ieu-a-966	27209	rs4845364	1.06974	1.1728	0.361703
154	Television watching (overall)	Lung cancer || id:ieu-a-966	HTIJzT	ieu-a-966	27209	rs4973576	-1.02186	1.3478	0.44835
155	Television watching (overall)	Lung cancer || id:ieu-a-966	HTIJzT	ieu-a-966	27209	rs553397860	-0.233243	1.46006	0.873079
156	Television watching (overall)	Lung cancer || id:ieu-a-966	HTIJzT	ieu-a-966	27209	rs56103247	1.4441	1.50003	0.335692
157	Television watching (overall)	Lung cancer || id:ieu-a-966	HTIJzT	ieu-a-966	27209	rs56398417	-1.80459	1.4675	0.218809
158	Television watching (overall)	Lung cancer || id:ieu-a-966	HTIJzT	ieu-a-966	27209	rs56858768	0.794647	1.32833	0.549688
159	Television watching (overall)	Lung cancer || id:ieu-a-966	HTIJzT	ieu-a-966	27209	rs57585211	0.969206	1.43994	0.500892
160	Television watching (overall)	Lung cancer || id:ieu-a-966	HTIJzT	ieu-a-966	27209	rs6131281	-2.15921	1.16781	0.0644676
161	Television watching (overall)	Lung cancer || id:ieu-a-966	HTIJzT	ieu-a-966	27209	rs6141814	1.78146	1.346	0.185663
162	Television watching (overall)	Lung cancer || id:ieu-a-966	HTIJzT	ieu-a-966	27209	rs62332760	-1.08223	1.30293	0.406193
163	Television watching (overall)	Lung cancer || id:ieu-a-966	HTIJzT	ieu-a-966	27209	rs62379379	3.51731	1.45319	0.0155034
164	Television watching (overall)	Lung cancer || id:ieu-a-966	HTIJzT	ieu-a-966	27209	rs62641636	2.06867	1.42136	0.145553
165	Television watching (overall)	Lung cancer || id:ieu-a-966	HTIJzT	ieu-a-966	27209	rs6472942	0.324238	1.39769	0.816553
166	Television watching (overall)	Lung cancer || id:ieu-a-966	HTIJzT	ieu-a-966	27209	rs648044	2.66274	1.39857	0.0569236
167	Television watching (overall)	Lung cancer || id:ieu-a-966	HTIJzT	ieu-a-966	27209	rs6673341	1.23205	1.1666	0.290922
168	Television watching (overall)	Lung cancer || id:ieu-a-966	HTIJzT	ieu-a-966	27209	rs66852340	-0.0188365	1.20228	0.9875
169	Television watching (overall)	Lung cancer || id:ieu-a-966	HTIJzT	ieu-a-966	27209	rs6721975	1.14957	1.32076	0.384091
170	Television watching (overall)	Lung cancer || id:ieu-a-966	HTIJzT	ieu-a-966	27209	rs6797840	-0.253983	1.11938	0.820504
171	Television watching (overall)	Lung cancer || id:ieu-a-966	HTIJzT	ieu-a-966	27209	rs6825241	0.933494	1.06824	0.382191
172	Television watching (overall)	Lung cancer || id:ieu-a-966	HTIJzT	ieu-a-966	27209	rs6850494	1.9623	1.35979	0.148994
173	Television watching (overall)	Lung cancer || id:ieu-a-966	HTIJzT	ieu-a-966	27209	rs6905544	-1.41445	0.999316	0.156945
174	Television watching (overall)	Lung cancer || id:ieu-a-966	HTIJzT	ieu-a-966	27209	rs7184800	-0.400457	1.15712	0.729281
175	Television watching (overall)	Lung cancer || id:ieu-a-966	HTIJzT	ieu-a-966	27209	rs7189927	2.85767	1.31513	0.0297871
176	Television watching (overall)	Lung cancer || id:ieu-a-966	HTIJzT	ieu-a-966	27209	rs7248205	-1.34043	1.34957	0.3206
177	Television watching (overall)	Lung cancer || id:ieu-a-966	HTIJzT	ieu-a-966	27209	rs72725224	-2.15632	1.39187	0.121328
178	Television watching (overall)	Lung cancer || id:ieu-a-966	HTIJzT	ieu-a-966	27209	rs72781699	0.409874	1.19863	0.732388
179	Television watching (overall)	Lung cancer || id:ieu-a-966	HTIJzT	ieu-a-966	27209	rs72828890	0.858916	1.59521	0.590277
180	Television watching (overall)	Lung cancer || id:ieu-a-966	HTIJzT	ieu-a-966	27209	rs72834698	2.33095	1.10548	0.0349841
181	Television watching (overall)	Lung cancer || id:ieu-a-966	HTIJzT	ieu-a-966	27209	rs74802478	2.12925	1.37624	0.121825
182	Television watching (overall)	Lung cancer || id:ieu-a-966	HTIJzT	ieu-a-966	27209	rs749671	1.86918	1.1255	0.0967635
183	Television watching (overall)	Lung cancer || id:ieu-a-966	HTIJzT	ieu-a-966	27209	rs7564130	1.79054	1.2462	0.150775
184	Television watching (overall)	Lung cancer || id:ieu-a-966	HTIJzT	ieu-a-966	27209	rs7693703	-1.32318	1.33626	0.32207
185	Television watching (overall)	Lung cancer || id:ieu-a-966	HTIJzT	ieu-a-966	27209	rs7716447	3.1658	1.95523	0.105416
186	Television watching (overall)	Lung cancer || id:ieu-a-966	HTIJzT	ieu-a-966	27209	rs7788008	-1.73852	1.41477	0.219134
187	Television watching (overall)	Lung cancer || id:ieu-a-966	HTIJzT	ieu-a-966	27209	rs7834121	-0.467538	1.327	0.724593
188	Television watching (overall)	Lung cancer || id:ieu-a-966	HTIJzT	ieu-a-966	27209	rs78394231	0.0018571	1.42167	0.998958
189	Television watching (overall)	Lung cancer || id:ieu-a-966	HTIJzT	ieu-a-966	27209	rs801733	-0.5923	1.11559	0.595467
190	Television watching (overall)	Lung cancer || id:ieu-a-966	HTIJzT	ieu-a-966	27209	rs8756	-1.00882	1.38938	0.467785
191	Television watching (overall)	Lung cancer || id:ieu-a-966	HTIJzT	ieu-a-966	27209	rs9471333	0.533835	1.38777	0.700481
192	Television watching (overall)	Lung cancer || id:ieu-a-966	HTIJzT	ieu-a-966	27209	rs9563168	-0.918806	1.23722	0.457702
193	Television watching (overall)	Lung cancer || id:ieu-a-966	HTIJzT	ieu-a-966	27209	rs9569734	0.746321	1.28405	0.56109
194	Television watching (overall)	Lung cancer || id:ieu-a-966	HTIJzT	ieu-a-966	27209	rs9834970	-1.70082	1.402	0.225076
195	Television watching (overall)	Lung cancer || id:ieu-a-966	HTIJzT	ieu-a-966	27209	rs984409	0.0879247	1.2414	0.943535
196	Television watching (overall)	Lung cancer || id:ieu-a-966	HTIJzT	ieu-a-966	27209	rs9867121	-0.759495	1.26932	0.549607
197	Television watching (overall)	Lung cancer || id:ieu-a-966	HTIJzT	ieu-a-966	27209	rs9902312	-1.17433	1.28067	0.359161
198	Television watching (overall)	Lung cancer || id:ieu-a-966	HTIJzT	ieu-a-966	27209	rs9964724	1.29029	1.08572	0.23467
199	Television watching (overall)	Lung cancer || id:ieu-a-966	HTIJzT	ieu-a-966	27209	All - Inverse variance weighted	0.63984	0.141711	6.32909e-06
200	Television watching (overall)	Lung cancer || id:ieu-a-966	HTIJzT	ieu-a-966	27209	All - MR Egger	0.591502	0.661601	0.373532
201	Television watching (overall)	Squamous cell lung cancer || id:ieu-a-967	HTIJzT	ieu-a-967	18313	rs10041724	0.43576	1.89222	0.817866
202	Television watching (overall)	Squamous cell lung cancer || id:ieu-a-967	HTIJzT	ieu-a-967	18313	rs10054327	-0.400574	1.64929	0.808101
203	Television watching (overall)	Squamous cell lung cancer || id:ieu-a-967	HTIJzT	ieu-a-967	18313	rs10189857	1.28904	1.4201	0.364031
204	Television watching (overall)	Squamous cell lung cancer || id:ieu-a-967	HTIJzT	ieu-a-967	18313	rs1031423	-0.345182	1.88579	0.854764
205	Television watching (overall)	Squamous cell lung cancer || id:ieu-a-967	HTIJzT	ieu-a-967	18313	rs10771746	-0.830164	2.14621	0.698901
206	Television watching (overall)	Squamous cell lung cancer || id:ieu-a-967	HTIJzT	ieu-a-967	18313	rs10772643	1.41936	1.77308	0.423419
207	Television watching (overall)	Squamous cell lung cancer || id:ieu-a-967	HTIJzT	ieu-a-967	18313	rs10876864	1.44425	2.097	0.490999
208	Television watching (overall)	Squamous cell lung cancer || id:ieu-a-967	HTIJzT	ieu-a-967	18313	rs10932837	-2.18588	2.15138	0.309614
209	Television watching (overall)	Squamous cell lung cancer || id:ieu-a-967	HTIJzT	ieu-a-967	18313	rs10947452	-0.401196	2.07007	0.846326
210	Television watching (overall)	Squamous cell lung cancer || id:ieu-a-967	HTIJzT	ieu-a-967	18313	rs11130793	-0.824262	2.16785	0.703781
211	Television watching (overall)	Squamous cell lung cancer || id:ieu-a-967	HTIJzT	ieu-a-967	18313	rs111901094	1.52746	2.59341	0.555875
212	Television watching (overall)	Squamous cell lung cancer || id:ieu-a-967	HTIJzT	ieu-a-967	18313	rs11218575	4.51717	1.7704	0.0107261
213	Television watching (overall)	Squamous cell lung cancer || id:ieu-a-967	HTIJzT	ieu-a-967	18313	rs11245482	2.79128	2.24438	0.213621
214	Television watching (overall)	Squamous cell lung cancer || id:ieu-a-967	HTIJzT	ieu-a-967	18313	rs114720649	-1.2887	2.56321	0.615128
215	Television watching (overall)	Squamous cell lung cancer || id:ieu-a-967	HTIJzT	ieu-a-967	18313	rs11689199	-2.34961	1.63017	0.149492
216	Television watching (overall)	Squamous cell lung cancer || id:ieu-a-967	HTIJzT	ieu-a-967	18313	rs11714337	-0.0639	1.99593	0.97446
217	Television watching (overall)	Squamous cell lung cancer || id:ieu-a-967	HTIJzT	ieu-a-967	18313	rs11917871	-0.422479	1.694	0.803053
218	Television watching (overall)	Squamous cell lung cancer || id:ieu-a-967	HTIJzT	ieu-a-967	18313	rs12105701	2.93115	2.09592	0.161963
219	Television watching (overall)	Squamous cell lung cancer || id:ieu-a-967	HTIJzT	ieu-a-967	18313	rs12342024	-0.15702	1.97148	0.936519
220	Television watching (overall)	Squamous cell lung cancer || id:ieu-a-967	HTIJzT	ieu-a-967	18313	rs1243182	0.545011	1.53953	0.72333
221	Television watching (overall)	Squamous cell lung cancer || id:ieu-a-967	HTIJzT	ieu-a-967	18313	rs12491503	-3.25304	1.97843	0.100124
222	Television watching (overall)	Squamous cell lung cancer || id:ieu-a-967	HTIJzT	ieu-a-967	18313	rs12554512	0.505914	1.37605	0.713129
223	Television watching (overall)	Squamous cell lung cancer || id:ieu-a-967	HTIJzT	ieu-a-967	18313	rs13107325	0.484921	1.82679	0.790663
224	Television watching (overall)	Squamous cell lung cancer || id:ieu-a-967	HTIJzT	ieu-a-967	18313	rs1451533	0.295364	1.96325	0.880412
225	Television watching (overall)	Squamous cell lung cancer || id:ieu-a-967	HTIJzT	ieu-a-967	18313	rs148544378	-0.388611	2.51983	0.877435
226	Television watching (overall)	Squamous cell lung cancer || id:ieu-a-967	HTIJzT	ieu-a-967	18313	rs148648822	1.40075	2.30822	0.543949
227	Television watching (overall)	Squamous cell lung cancer || id:ieu-a-967	HTIJzT	ieu-a-967	18313	rs17207890	3.55827	1.73463	0.0402359
228	Television watching (overall)	Squamous cell lung cancer || id:ieu-a-967	HTIJzT	ieu-a-967	18313	rs17727474	2.71727	1.87994	0.148345
229	Television watching (overall)	Squamous cell lung cancer || id:ieu-a-967	HTIJzT	ieu-a-967	18313	rs17789218	0.685126	1.71842	0.690118
230	Television watching (overall)	Squamous cell lung cancer || id:ieu-a-967	HTIJzT	ieu-a-967	18313	rs182355396	1.13357	1.77392	0.52281
231	Television watching (overall)	Squamous cell lung cancer || id:ieu-a-967	HTIJzT	ieu-a-967	18313	rs1913808	1.19966	1.92947	0.534101
232	Television watching (overall)	Squamous cell lung cancer || id:ieu-a-967	HTIJzT	ieu-a-967	18313	rs2034768	0.8697	1.86073	0.640216
233	Television watching (overall)	Squamous cell lung cancer || id:ieu-a-967	HTIJzT	ieu-a-967	18313	rs2045147	2.67732	2.19285	0.222111
234	Television watching (overall)	Squamous cell lung cancer || id:ieu-a-967	HTIJzT	ieu-a-967	18313	rs2073869	-1.53646	1.83953	0.403579
235	Television watching (overall)	Squamous cell lung cancer || id:ieu-a-967	HTIJzT	ieu-a-967	18313	rs2173650	2.15071	2.16233	0.319919
236	Television watching (overall)	Squamous cell lung cancer || id:ieu-a-967	HTIJzT	ieu-a-967	18313	rs2184364	1.16135	2.02588	0.56647
237	Television watching (overall)	Squamous cell lung cancer || id:ieu-a-967	HTIJzT	ieu-a-967	18313	rs2291681	0.198641	2.12462	0.92551
238	Television watching (overall)	Squamous cell lung cancer || id:ieu-a-967	HTIJzT	ieu-a-967	18313	rs2447098	3.10583	1.7716	0.0795808
239	Television watching (overall)	Squamous cell lung cancer || id:ieu-a-967	HTIJzT	ieu-a-967	18313	rs2460	-1.11385	2.11107	0.597759
240	Television watching (overall)	Squamous cell lung cancer || id:ieu-a-967	HTIJzT	ieu-a-967	18313	rs2584597	0.222839	2.1024	0.915588
241	Television watching (overall)	Squamous cell lung cancer || id:ieu-a-967	HTIJzT	ieu-a-967	18313	rs2616830	0.0821956	1.71562	0.961788
242	Television watching (overall)	Squamous cell lung cancer || id:ieu-a-967	HTIJzT	ieu-a-967	18313	rs262890	4.20926	1.69168	0.012839
243	Television watching (overall)	Squamous cell lung cancer || id:ieu-a-967	HTIJzT	ieu-a-967	18313	rs263771	2.64791	2.05747	0.198103
244	Television watching (overall)	Squamous cell lung cancer || id:ieu-a-967	HTIJzT	ieu-a-967	18313	rs2971640	4.42081	2.22185	0.046624
245	Television watching (overall)	Squamous cell lung cancer || id:ieu-a-967	HTIJzT	ieu-a-967	18313	rs303753	3.77429	2.17714	0.0829898
246	Television watching (overall)	Squamous cell lung cancer || id:ieu-a-967	HTIJzT	ieu-a-967	18313	rs34811474	4.36325	2.64233	0.0986798
247	Television watching (overall)	Squamous cell lung cancer || id:ieu-a-967	HTIJzT	ieu-a-967	18313	rs34864022	1.1548	2.19073	0.598105
248	Television watching (overall)	Squamous cell lung cancer || id:ieu-a-967	HTIJzT	ieu-a-967	18313	rs374722	0.997138	1.61142	0.536051
249	Television watching (overall)	Squamous cell lung cancer || id:ieu-a-967	HTIJzT	ieu-a-967	18313	rs3754970	2.39435	1.76213	0.174216
250	Television watching (overall)	Squamous cell lung cancer || id:ieu-a-967	HTIJzT	ieu-a-967	18313	rs3796386	-0.170918	1.06273	0.872228
251	Television watching (overall)	Squamous cell lung cancer || id:ieu-a-967	HTIJzT	ieu-a-967	18313	rs4382592	6.21371	2.28807	0.00661359
252	Television watching (overall)	Squamous cell lung cancer || id:ieu-a-967	HTIJzT	ieu-a-967	18313	rs4577309	5.22478	1.85769	0.00491556
253	Television watching (overall)	Squamous cell lung cancer || id:ieu-a-967	HTIJzT	ieu-a-967	18313	rs4845364	0.782307	1.8048	0.664681
254	Television watching (overall)	Squamous cell lung cancer || id:ieu-a-967	HTIJzT	ieu-a-967	18313	rs4973576	0.70316	2.02707	0.728677
255	Television watching (overall)	Squamous cell lung cancer || id:ieu-a-967	HTIJzT	ieu-a-967	18313	rs553397860	-2.02356	2.29824	0.378597
256	Television watching (overall)	Squamous cell lung cancer || id:ieu-a-967	HTIJzT	ieu-a-967	18313	rs56103247	1.48722	2.29503	0.516973
257	Television watching (overall)	Squamous cell lung cancer || id:ieu-a-967	HTIJzT	ieu-a-967	18313	rs56398417	-3.31651	2.30886	0.15088
258	Television watching (overall)	Squamous cell lung cancer || id:ieu-a-967	HTIJzT	ieu-a-967	18313	rs56858768	-0.957987	1.97093	0.626926
259	Television watching (overall)	Squamous cell lung cancer || id:ieu-a-967	HTIJzT	ieu-a-967	18313	rs57585211	0.497304	2.20071	0.821221
260	Television watching (overall)	Squamous cell lung cancer || id:ieu-a-967	HTIJzT	ieu-a-967	18313	rs6131281	-3.26134	1.82787	0.0743868
261	Television watching (overall)	Squamous cell lung cancer || id:ieu-a-967	HTIJzT	ieu-a-967	18313	rs6141814	0.836514	2.03443	0.680941
262	Television watching (overall)	Squamous cell lung cancer || id:ieu-a-967	HTIJzT	ieu-a-967	18313	rs62332760	-1.95956	1.97521	0.32116
263	Television watching (overall)	Squamous cell lung cancer || id:ieu-a-967	HTIJzT	ieu-a-967	18313	rs62379379	3.82018	2.20115	0.0826457
264	Television watching (overall)	Squamous cell lung cancer || id:ieu-a-967	HTIJzT	ieu-a-967	18313	rs62641636	2.73239	2.1535	0.204508
265	Television watching (overall)	Squamous cell lung cancer || id:ieu-a-967	HTIJzT	ieu-a-967	18313	rs6472942	1.13853	2.16015	0.598152
266	Television watching (overall)	Squamous cell lung cancer || id:ieu-a-967	HTIJzT	ieu-a-967	18313	rs648044	0.355598	2.21807	0.87263
267	Television watching (overall)	Squamous cell lung cancer || id:ieu-a-967	HTIJzT	ieu-a-967	18313	rs6673341	1.87945	1.77153	0.288728
268	Television watching (overall)	Squamous cell lung cancer || id:ieu-a-967	HTIJzT	ieu-a-967	18313	rs66852340	0.06585	1.83878	0.971432
269	Television watching (overall)	Squamous cell lung cancer || id:ieu-a-967	HTIJzT	ieu-a-967	18313	rs6721975	3.47095	1.96424	0.077216
270	Television watching (overall)	Squamous cell lung cancer || id:ieu-a-967	HTIJzT	ieu-a-967	18313	rs6797840	-1.34076	1.74919	0.443375
271	Television watching (overall)	Squamous cell lung cancer || id:ieu-a-967	HTIJzT	ieu-a-967	18313	rs6825241	-1.2237	1.56982	0.435677
272	Television watching (overall)	Squamous cell lung cancer || id:ieu-a-967	HTIJzT	ieu-a-967	18313	rs6850494	1.01046	2.065	0.624609
273	Television watching (overall)	Squamous cell lung cancer || id:ieu-a-967	HTIJzT	ieu-a-967	18313	rs6905544	0.0907095	1.49426	0.951594
274	Television watching (overall)	Squamous cell lung cancer || id:ieu-a-967	HTIJzT	ieu-a-967	18313	rs7184800	-0.809753	1.78447	0.649989
275	Television watching (overall)	Squamous cell lung cancer || id:ieu-a-967	HTIJzT	ieu-a-967	18313	rs7189927	3.79661	2.03513	0.0621064
276	Television watching (overall)	Squamous cell lung cancer || id:ieu-a-967	HTIJzT	ieu-a-967	18313	rs7248205	1.84121	2.16986	0.396138
277	Television watching (overall)	Squamous cell lung cancer || id:ieu-a-967	HTIJzT	ieu-a-967	18313	rs72725224	-2.55139	2.05196	0.213723
278	Television watching (overall)	Squamous cell lung cancer || id:ieu-a-967	HTIJzT	ieu-a-967	18313	rs72781699	-1.27522	1.79479	0.477386
279	Television watching (overall)	Squamous cell lung cancer || id:ieu-a-967	HTIJzT	ieu-a-967	18313	rs72828890	-1.22171	2.549	0.631732
280	Television watching (overall)	Squamous cell lung cancer || id:ieu-a-967	HTIJzT	ieu-a-967	18313	rs72834698	3.07057	1.66291	0.0648196
281	Television watching (overall)	Squamous cell lung cancer || id:ieu-a-967	HTIJzT	ieu-a-967	18313	rs74802478	4.01502	2.06918	0.0523318
282	Television watching (overall)	Squamous cell lung cancer || id:ieu-a-967	HTIJzT	ieu-a-967	18313	rs749671	3.96077	1.67394	0.0179747
283	Television watching (overall)	Squamous cell lung cancer || id:ieu-a-967	HTIJzT	ieu-a-967	18313	rs7564130	3.01957	1.94493	0.120535
284	Television watching (overall)	Squamous cell lung cancer || id:ieu-a-967	HTIJzT	ieu-a-967	18313	rs7693703	-2.1129	2.076	0.308784
285	Television watching (overall)	Squamous cell lung cancer || id:ieu-a-967	HTIJzT	ieu-a-967	18313	rs7716447	3.9369	3.05069	0.196879
286	Television watching (overall)	Squamous cell lung cancer || id:ieu-a-967	HTIJzT	ieu-a-967	18313	rs7788008	-1.69089	2.17146	0.436163
287	Television watching (overall)	Squamous cell lung cancer || id:ieu-a-967	HTIJzT	ieu-a-967	18313	rs7834121	-2.6443	2.09586	0.207064
288	Television watching (overall)	Squamous cell lung cancer || id:ieu-a-967	HTIJzT	ieu-a-967	18313	rs78394231	1.28614	2.20671	0.560007
289	Television watching (overall)	Squamous cell lung cancer || id:ieu-a-967	HTIJzT	ieu-a-967	18313	rs801733	0.732306	1.66853	0.660739
290	Television watching (overall)	Squamous cell lung cancer || id:ieu-a-967	HTIJzT	ieu-a-967	18313	rs8756	-0.653982	2.11608	0.757281
291	Television watching (overall)	Squamous cell lung cancer || id:ieu-a-967	HTIJzT	ieu-a-967	18313	rs9471333	0.358931	2.11531	0.86526
292	Television watching (overall)	Squamous cell lung cancer || id:ieu-a-967	HTIJzT	ieu-a-967	18313	rs9563168	-2.37021	1.94444	0.222857
293	Television watching (overall)	Squamous cell lung cancer || id:ieu-a-967	HTIJzT	ieu-a-967	18313	rs9569734	-2.07417	2.05447	0.312694
294	Television watching (overall)	Squamous cell lung cancer || id:ieu-a-967	HTIJzT	ieu-a-967	18313	rs9834970	-0.490204	2.10485	0.815845
295	Television watching (overall)	Squamous cell lung cancer || id:ieu-a-967	HTIJzT	ieu-a-967	18313	rs984409	-0.838967	1.92193	0.662458
296	Television watching (overall)	Squamous cell lung cancer || id:ieu-a-967	HTIJzT	ieu-a-967	18313	rs9867121	-0.895084	1.95837	0.647631
297	Television watching (overall)	Squamous cell lung cancer || id:ieu-a-967	HTIJzT	ieu-a-967	18313	rs9902312	-2.30554	1.99127	0.246935
298	Television watching (overall)	Squamous cell lung cancer || id:ieu-a-967	HTIJzT	ieu-a-967	18313	rs9964724	1.80239	1.67422	0.28168
299	Television watching (overall)	Squamous cell lung cancer || id:ieu-a-967	HTIJzT	ieu-a-967	18313	All - Inverse variance weighted	0.676051	0.205294	0.000990919
300	Television watching (overall)	Squamous cell lung cancer || id:ieu-a-967	HTIJzT	ieu-a-967	18313	All - MR Egger	0.0770445	0.952403	0.935694
301	Television watching (excluded pleiotropic SNPs)	Lung adenocarcinoma || id:ieu-a-965	ezQkco	ieu-a-965	18336	rs10041724	4.37085	1.77656	0.0138823
302	Television watching (excluded pleiotropic SNPs)	Lung adenocarcinoma || id:ieu-a-965	ezQkco	ieu-a-965	18336	rs10054327	-0.440873	1.65859	0.790384
303	Television watching (excluded pleiotropic SNPs)	Lung adenocarcinoma || id:ieu-a-965	ezQkco	ieu-a-965	18336	rs1031423	-0.601811	1.83268	0.742627
304	Television watching (excluded pleiotropic SNPs)	Lung adenocarcinoma || id:ieu-a-965	ezQkco	ieu-a-965	18336	rs10771746	6.1526	2.35957	0.00912041
305	Television watching (excluded pleiotropic SNPs)	Lung adenocarcinoma || id:ieu-a-965	ezQkco	ieu-a-965	18336	rs10932837	0.576152	2.077	0.781476
306	Television watching (excluded pleiotropic SNPs)	Lung adenocarcinoma || id:ieu-a-965	ezQkco	ieu-a-965	18336	rs10947452	-1.41449	2.03407	0.486807
307	Television watching (excluded pleiotropic SNPs)	Lung adenocarcinoma || id:ieu-a-965	ezQkco	ieu-a-965	18336	rs11130793	1.59504	2.11092	0.449882
308	Television watching (excluded pleiotropic SNPs)	Lung adenocarcinoma || id:ieu-a-965	ezQkco	ieu-a-965	18336	rs11218575	0.777587	1.85453	0.675004
309	Television watching (excluded pleiotropic SNPs)	Lung adenocarcinoma || id:ieu-a-965	ezQkco	ieu-a-965	18336	rs11245482	1.52698	2.21677	0.49093
310	Television watching (excluded pleiotropic SNPs)	Lung adenocarcinoma || id:ieu-a-965	ezQkco	ieu-a-965	18336	rs114720649	-0.531256	2.5745	0.836515
311	Television watching (excluded pleiotropic SNPs)	Lung adenocarcinoma || id:ieu-a-965	ezQkco	ieu-a-965	18336	rs11917871	0.298639	1.66147	0.857354
312	Television watching (excluded pleiotropic SNPs)	Lung adenocarcinoma || id:ieu-a-965	ezQkco	ieu-a-965	18336	rs12105701	1.84015	2.10415	0.38183
313	Television watching (excluded pleiotropic SNPs)	Lung adenocarcinoma || id:ieu-a-965	ezQkco	ieu-a-965	18336	rs12342024	0.907348	2.0911	0.664354
314	Television watching (excluded pleiotropic SNPs)	Lung adenocarcinoma || id:ieu-a-965	ezQkco	ieu-a-965	18336	rs12491503	1.22473	2.08879	0.55765
315	Television watching (excluded pleiotropic SNPs)	Lung adenocarcinoma || id:ieu-a-965	ezQkco	ieu-a-965	18336	rs1451533	0.555834	2.00294	0.781389
316	Television watching (excluded pleiotropic SNPs)	Lung adenocarcinoma || id:ieu-a-965	ezQkco	ieu-a-965	18336	rs148544378	0.45383	2.37215	0.848278
317	Television watching (excluded pleiotropic SNPs)	Lung adenocarcinoma || id:ieu-a-965	ezQkco	ieu-a-965	18336	rs148648822	-3.11711	2.15389	0.147841
318	Television watching (excluded pleiotropic SNPs)	Lung adenocarcinoma || id:ieu-a-965	ezQkco	ieu-a-965	18336	rs17207890	4.82822	1.684	0.00414235
319	Television watching (excluded pleiotropic SNPs)	Lung adenocarcinoma || id:ieu-a-965	ezQkco	ieu-a-965	18336	rs17727474	3.0521	1.8745	0.103478
320	Television watching (excluded pleiotropic SNPs)	Lung adenocarcinoma || id:ieu-a-965	ezQkco	ieu-a-965	18336	rs17789218	-0.907653	1.738	0.601503
321	Television watching (excluded pleiotropic SNPs)	Lung adenocarcinoma || id:ieu-a-965	ezQkco	ieu-a-965	18336	rs182355396	2.74409	1.9552	0.160473
322	Television watching (excluded pleiotropic SNPs)	Lung adenocarcinoma || id:ieu-a-965	ezQkco	ieu-a-965	18336	rs2034768	1.07889	1.87	0.563977
323	Television watching (excluded pleiotropic SNPs)	Lung adenocarcinoma || id:ieu-a-965	ezQkco	ieu-a-965	18336	rs2073869	-1.39898	1.88195	0.457259
324	Television watching (excluded pleiotropic SNPs)	Lung adenocarcinoma || id:ieu-a-965	ezQkco	ieu-a-965	18336	rs2173650	0.665528	2.17617	0.759737
325	Television watching (excluded pleiotropic SNPs)	Lung adenocarcinoma || id:ieu-a-965	ezQkco	ieu-a-965	18336	rs2184364	3.81384	1.972	0.0531134
326	Television watching (excluded pleiotropic SNPs)	Lung adenocarcinoma || id:ieu-a-965	ezQkco	ieu-a-965	18336	rs2291681	-0.258182	2.13569	0.903779
327	Television watching (excluded pleiotropic SNPs)	Lung adenocarcinoma || id:ieu-a-965	ezQkco	ieu-a-965	18336	rs2460	-3.59494	2.03633	0.0774968
328	Television watching (excluded pleiotropic SNPs)	Lung adenocarcinoma || id:ieu-a-965	ezQkco	ieu-a-965	18336	rs2971640	2.81902	2.17323	0.194578
329	Television watching (excluded pleiotropic SNPs)	Lung adenocarcinoma || id:ieu-a-965	ezQkco	ieu-a-965	18336	rs303753	0.282014	2.07507	0.891896
330	Television watching (excluded pleiotropic SNPs)	Lung adenocarcinoma || id:ieu-a-965	ezQkco	ieu-a-965	18336	rs34811474	-0.881347	2.86913	0.758705
331	Television watching (excluded pleiotropic SNPs)	Lung adenocarcinoma || id:ieu-a-965	ezQkco	ieu-a-965	18336	rs34864022	-0.340425	2.14846	0.874102
332	Television watching (excluded pleiotropic SNPs)	Lung adenocarcinoma || id:ieu-a-965	ezQkco	ieu-a-965	18336	rs374722	0.450842	1.58796	0.776477
333	Television watching (excluded pleiotropic SNPs)	Lung adenocarcinoma || id:ieu-a-965	ezQkco	ieu-a-965	18336	rs4382592	2.40354	2.16943	0.2679
334	Television watching (excluded pleiotropic SNPs)	Lung adenocarcinoma || id:ieu-a-965	ezQkco	ieu-a-965	18336	rs4577309	2.79631	1.78869	0.117975
335	Television watching (excluded pleiotropic SNPs)	Lung adenocarcinoma || id:ieu-a-965	ezQkco	ieu-a-965	18336	rs4845364	1.41961	1.79	0.427733
336	Television watching (excluded pleiotropic SNPs)	Lung adenocarcinoma || id:ieu-a-965	ezQkco	ieu-a-965	18336	rs4973576	0.123181	2.0482	0.952043
337	Television watching (excluded pleiotropic SNPs)	Lung adenocarcinoma || id:ieu-a-965	ezQkco	ieu-a-965	18336	rs553397860	-0.699006	2.25782	0.756871
338	Television watching (excluded pleiotropic SNPs)	Lung adenocarcinoma || id:ieu-a-965	ezQkco	ieu-a-965	18336	rs56103247	3.04694	2.1787	0.161959
339	Television watching (excluded pleiotropic SNPs)	Lung adenocarcinoma || id:ieu-a-965	ezQkco	ieu-a-965	18336	rs56398417	-1.45529	2.24986	0.517739
340	Television watching (excluded pleiotropic SNPs)	Lung adenocarcinoma || id:ieu-a-965	ezQkco	ieu-a-965	18336	rs56858768	0.380578	2.03113	0.851369
341	Television watching (excluded pleiotropic SNPs)	Lung adenocarcinoma || id:ieu-a-965	ezQkco	ieu-a-965	18336	rs57585211	2.55336	2.23588	0.253458
342	Television watching (excluded pleiotropic SNPs)	Lung adenocarcinoma || id:ieu-a-965	ezQkco	ieu-a-965	18336	rs6131281	-1.71044	1.78506	0.337963
343	Television watching (excluded pleiotropic SNPs)	Lung adenocarcinoma || id:ieu-a-965	ezQkco	ieu-a-965	18336	rs62379379	3.22395	2.26942	0.155433
344	Television watching (excluded pleiotropic SNPs)	Lung adenocarcinoma || id:ieu-a-965	ezQkco	ieu-a-965	18336	rs62641636	1.90804	2.18329	0.382155
345	Television watching (excluded pleiotropic SNPs)	Lung adenocarcinoma || id:ieu-a-965	ezQkco	ieu-a-965	18336	rs6472942	-0.815462	2.09685	0.697351
346	Television watching (excluded pleiotropic SNPs)	Lung adenocarcinoma || id:ieu-a-965	ezQkco	ieu-a-965	18336	rs66852340	1.61469	1.89389	0.393891
347	Television watching (excluded pleiotropic SNPs)	Lung adenocarcinoma || id:ieu-a-965	ezQkco	ieu-a-965	18336	rs6721975	0.6601	2.05512	0.74806
348	Television watching (excluded pleiotropic SNPs)	Lung adenocarcinoma || id:ieu-a-965	ezQkco	ieu-a-965	18336	rs6797840	0.147173	1.70719	0.931301
349	Television watching (excluded pleiotropic SNPs)	Lung adenocarcinoma || id:ieu-a-965	ezQkco	ieu-a-965	18336	rs6825241	1.09654	1.63706	0.50297
350	Television watching (excluded pleiotropic SNPs)	Lung adenocarcinoma || id:ieu-a-965	ezQkco	ieu-a-965	18336	rs6850494	2.95893	2.11943	0.162685
351	Television watching (excluded pleiotropic SNPs)	Lung adenocarcinoma || id:ieu-a-965	ezQkco	ieu-a-965	18336	rs7184800	-0.563586	1.76335	0.749264
352	Television watching (excluded pleiotropic SNPs)	Lung adenocarcinoma || id:ieu-a-965	ezQkco	ieu-a-965	18336	rs72725224	-1.6226	2.02443	0.422838
353	Television watching (excluded pleiotropic SNPs)	Lung adenocarcinoma || id:ieu-a-965	ezQkco	ieu-a-965	18336	rs72781699	0.651163	1.82626	0.721425
354	Television watching (excluded pleiotropic SNPs)	Lung adenocarcinoma || id:ieu-a-965	ezQkco	ieu-a-965	18336	rs72828890	0.762068	2.47426	0.758084
355	Television watching (excluded pleiotropic SNPs)	Lung adenocarcinoma || id:ieu-a-965	ezQkco	ieu-a-965	18336	rs72834698	1.4736	1.72839	0.393888
356	Television watching (excluded pleiotropic SNPs)	Lung adenocarcinoma || id:ieu-a-965	ezQkco	ieu-a-965	18336	rs74802478	2.15365	2.10224	0.305619
357	Television watching (excluded pleiotropic SNPs)	Lung adenocarcinoma || id:ieu-a-965	ezQkco	ieu-a-965	18336	rs7564130	0.581721	1.8874	0.75792
358	Television watching (excluded pleiotropic SNPs)	Lung adenocarcinoma || id:ieu-a-965	ezQkco	ieu-a-965	18336	rs7693703	-2.92737	2.1007	0.163461
359	Television watching (excluded pleiotropic SNPs)	Lung adenocarcinoma || id:ieu-a-965	ezQkco	ieu-a-965	18336	rs7716447	-1.07837	2.833	0.703466
360	Television watching (excluded pleiotropic SNPs)	Lung adenocarcinoma || id:ieu-a-965	ezQkco	ieu-a-965	18336	rs7788008	-2.86691	2.20146	0.192822
361	Television watching (excluded pleiotropic SNPs)	Lung adenocarcinoma || id:ieu-a-965	ezQkco	ieu-a-965	18336	rs7834121	2.67044	1.94657	0.170104
362	Television watching (excluded pleiotropic SNPs)	Lung adenocarcinoma || id:ieu-a-965	ezQkco	ieu-a-965	18336	rs9471333	0.551785	2.125	0.795123
363	Television watching (excluded pleiotropic SNPs)	Lung adenocarcinoma || id:ieu-a-965	ezQkco	ieu-a-965	18336	rs9563168	-2.24097	1.91928	0.242964
364	Television watching (excluded pleiotropic SNPs)	Lung adenocarcinoma || id:ieu-a-965	ezQkco	ieu-a-965	18336	rs9569734	1.33306	1.95153	0.494553
365	Television watching (excluded pleiotropic SNPs)	Lung adenocarcinoma || id:ieu-a-965	ezQkco	ieu-a-965	18336	rs984409	-0.041587	1.9014	0.98255
366	Television watching (excluded pleiotropic SNPs)	Lung adenocarcinoma || id:ieu-a-965	ezQkco	ieu-a-965	18336	rs9867121	-1.15966	1.938	0.549587
367	Television watching (excluded pleiotropic SNPs)	Lung adenocarcinoma || id:ieu-a-965	ezQkco	ieu-a-965	18336	rs9902312	-1.14465	1.9452	0.55623
368	Television watching (excluded pleiotropic SNPs)	Lung adenocarcinoma || id:ieu-a-965	ezQkco	ieu-a-965	18336	All - Inverse variance weighted	0.665355	0.243458	0.00627721
369	Television watching (excluded pleiotropic SNPs)	Lung adenocarcinoma || id:ieu-a-965	ezQkco	ieu-a-965	18336	All - MR Egger	0.602068	1.10786	0.588679
370	Television watching (excluded pleiotropic SNPs)	Lung cancer || id:ieu-a-966	ezQkco	ieu-a-966	27209	rs10041724	1.70008	1.21389	0.161356
371	Television watching (excluded pleiotropic SNPs)	Lung cancer || id:ieu-a-966	ezQkco	ieu-a-966	27209	rs10054327	0.0523174	1.07159	0.961061
372	Television watching (excluded pleiotropic SNPs)	Lung cancer || id:ieu-a-966	ezQkco	ieu-a-966	27209	rs1031423	-1.33718	1.23205	0.277775
373	Television watching (excluded pleiotropic SNPs)	Lung cancer || id:ieu-a-966	ezQkco	ieu-a-966	27209	rs10771746	2.73861	1.46907	0.062297
374	Television watching (excluded pleiotropic SNPs)	Lung cancer || id:ieu-a-966	ezQkco	ieu-a-966	27209	rs10932837	0.0812738	1.36738	0.952604
375	Television watching (excluded pleiotropic SNPs)	Lung cancer || id:ieu-a-966	ezQkco	ieu-a-966	27209	rs10947452	0.0514101	1.36171	0.969884
376	Television watching (excluded pleiotropic SNPs)	Lung cancer || id:ieu-a-966	ezQkco	ieu-a-966	27209	rs11130793	-0.0159983	1.40238	0.990898
377	Television watching (excluded pleiotropic SNPs)	Lung cancer || id:ieu-a-966	ezQkco	ieu-a-966	27209	rs11218575	1.73135	1.1934	0.146843
378	Television watching (excluded pleiotropic SNPs)	Lung cancer || id:ieu-a-966	ezQkco	ieu-a-966	27209	rs11245482	1.37684	1.44338	0.340136
379	Television watching (excluded pleiotropic SNPs)	Lung cancer || id:ieu-a-966	ezQkco	ieu-a-966	27209	rs114720649	-1.34159	1.66643	0.420779
380	Television watching (excluded pleiotropic SNPs)	Lung cancer || id:ieu-a-966	ezQkco	ieu-a-966	27209	rs11917871	-0.294848	1.09882	0.788445
381	Television watching (excluded pleiotropic SNPs)	Lung cancer || id:ieu-a-966	ezQkco	ieu-a-966	27209	rs12105701	2.90685	1.36623	0.0333665
382	Television watching (excluded pleiotropic SNPs)	Lung cancer || id:ieu-a-966	ezQkco	ieu-a-966	27209	rs12342024	0.541338	1.33681	0.685516
383	Television watching (excluded pleiotropic SNPs)	Lung cancer || id:ieu-a-966	ezQkco	ieu-a-966	27209	rs12491503	1.22494	1.36457	0.369361
384	Television watching (excluded pleiotropic SNPs)	Lung cancer || id:ieu-a-966	ezQkco	ieu-a-966	27209	rs1451533	1.30203	1.30412	0.318088
385	Television watching (excluded pleiotropic SNPs)	Lung cancer || id:ieu-a-966	ezQkco	ieu-a-966	27209	rs148544378	1.19908	1.51749	0.429426
386	Television watching (excluded pleiotropic SNPs)	Lung cancer || id:ieu-a-966	ezQkco	ieu-a-966	27209	rs148648822	-0.43716	1.45928	0.764503
387	Television watching (excluded pleiotropic SNPs)	Lung cancer || id:ieu-a-966	ezQkco	ieu-a-966	27209	rs17207890	3.13594	1.13456	0.00570965
388	Television watching (excluded pleiotropic SNPs)	Lung cancer || id:ieu-a-966	ezQkco	ieu-a-966	27209	rs17727474	1.80897	1.25211	0.148533
389	Television watching (excluded pleiotropic SNPs)	Lung cancer || id:ieu-a-966	ezQkco	ieu-a-966	27209	rs17789218	0.600784	1.11284	0.58929
390	Television watching (excluded pleiotropic SNPs)	Lung cancer || id:ieu-a-966	ezQkco	ieu-a-966	27209	rs182355396	1.54564	1.1908	0.194293
391	Television watching (excluded pleiotropic SNPs)	Lung cancer || id:ieu-a-966	ezQkco	ieu-a-966	27209	rs2034768	0.275364	1.2036	0.819037
392	Television watching (excluded pleiotropic SNPs)	Lung cancer || id:ieu-a-966	ezQkco	ieu-a-966	27209	rs2073869	0.182315	1.18611	0.877839
393	Television watching (excluded pleiotropic SNPs)	Lung cancer || id:ieu-a-966	ezQkco	ieu-a-966	27209	rs2173650	1.64454	1.4135	0.244645
394	Television watching (excluded pleiotropic SNPs)	Lung cancer || id:ieu-a-966	ezQkco	ieu-a-966	27209	rs2184364	0.666412	1.33794	0.618421
395	Television watching (excluded pleiotropic SNPs)	Lung cancer || id:ieu-a-966	ezQkco	ieu-a-966	27209	rs2291681	0.370429	1.383	0.788819
396	Television watching (excluded pleiotropic SNPs)	Lung cancer || id:ieu-a-966	ezQkco	ieu-a-966	27209	rs2460	-3.42643	1.3272	0.00983148
397	Television watching (excluded pleiotropic SNPs)	Lung cancer || id:ieu-a-966	ezQkco	ieu-a-966	27209	rs2971640	2.88721	1.417	0.041595
398	Television watching (excluded pleiotropic SNPs)	Lung cancer || id:ieu-a-966	ezQkco	ieu-a-966	27209	rs303753	2.17525	1.388	0.117072
399	Television watching (excluded pleiotropic SNPs)	Lung cancer || id:ieu-a-966	ezQkco	ieu-a-966	27209	rs34811474	2.82954	1.7652	0.108944
400	Television watching (excluded pleiotropic SNPs)	Lung cancer || id:ieu-a-966	ezQkco	ieu-a-966	27209	rs34864022	0.0965712	1.41727	0.945675
401	Television watching (excluded pleiotropic SNPs)	Lung cancer || id:ieu-a-966	ezQkco	ieu-a-966	27209	rs374722	0.273558	1.03846	0.792221
402	Television watching (excluded pleiotropic SNPs)	Lung cancer || id:ieu-a-966	ezQkco	ieu-a-966	27209	rs4382592	3.22501	1.44179	0.0252981
403	Television watching (excluded pleiotropic SNPs)	Lung cancer || id:ieu-a-966	ezQkco	ieu-a-966	27209	rs4577309	3.63532	1.18175	0.00209646
404	Television watching (excluded pleiotropic SNPs)	Lung cancer || id:ieu-a-966	ezQkco	ieu-a-966	27209	rs4845364	1.06974	1.1728	0.361703
405	Television watching (excluded pleiotropic SNPs)	Lung cancer || id:ieu-a-966	ezQkco	ieu-a-966	27209	rs4973576	-1.02186	1.3478	0.44835
406	Television watching (excluded pleiotropic SNPs)	Lung cancer || id:ieu-a-966	ezQkco	ieu-a-966	27209	rs553397860	-0.233243	1.46006	0.873079
407	Television watching (excluded pleiotropic SNPs)	Lung cancer || id:ieu-a-966	ezQkco	ieu-a-966	27209	rs56103247	1.4441	1.50003	0.335692
408	Television watching (excluded pleiotropic SNPs)	Lung cancer || id:ieu-a-966	ezQkco	ieu-a-966	27209	rs56398417	-1.80459	1.4675	0.218809
409	Television watching (excluded pleiotropic SNPs)	Lung cancer || id:ieu-a-966	ezQkco	ieu-a-966	27209	rs56858768	0.794647	1.32833	0.549688
410	Television watching (excluded pleiotropic SNPs)	Lung cancer || id:ieu-a-966	ezQkco	ieu-a-966	27209	rs57585211	0.969206	1.43994	0.500892
411	Television watching (excluded pleiotropic SNPs)	Lung cancer || id:ieu-a-966	ezQkco	ieu-a-966	27209	rs6131281	-2.15921	1.16781	0.0644676
412	Television watching (excluded pleiotropic SNPs)	Lung cancer || id:ieu-a-966	ezQkco	ieu-a-966	27209	rs62379379	3.51731	1.45319	0.0155034
413	Television watching (excluded pleiotropic SNPs)	Lung cancer || id:ieu-a-966	ezQkco	ieu-a-966	27209	rs62641636	2.06867	1.42136	0.145553
414	Television watching (excluded pleiotropic SNPs)	Lung cancer || id:ieu-a-966	ezQkco	ieu-a-966	27209	rs6472942	0.324238	1.39769	0.816553
415	Television watching (excluded pleiotropic SNPs)	Lung cancer || id:ieu-a-966	ezQkco	ieu-a-966	27209	rs66852340	-0.0188365	1.20228	0.9875
416	Television watching (excluded pleiotropic SNPs)	Lung cancer || id:ieu-a-966	ezQkco	ieu-a-966	27209	rs6721975	1.14957	1.32076	0.384091
417	Television watching (excluded pleiotropic SNPs)	Lung cancer || id:ieu-a-966	ezQkco	ieu-a-966	27209	rs6797840	-0.253983	1.11938	0.820504
418	Television watching (excluded pleiotropic SNPs)	Lung cancer || id:ieu-a-966	ezQkco	ieu-a-966	27209	rs6825241	0.933494	1.06824	0.382191
419	Television watching (excluded pleiotropic SNPs)	Lung cancer || id:ieu-a-966	ezQkco	ieu-a-966	27209	rs6850494	1.9623	1.35979	0.148994
420	Television watching (excluded pleiotropic SNPs)	Lung cancer || id:ieu-a-966	ezQkco	ieu-a-966	27209	rs7184800	-0.400457	1.15712	0.729281
421	Television watching (excluded pleiotropic SNPs)	Lung cancer || id:ieu-a-966	ezQkco	ieu-a-966	27209	rs72725224	-2.15632	1.39187	0.121328
422	Television watching (excluded pleiotropic SNPs)	Lung cancer || id:ieu-a-966	ezQkco	ieu-a-966	27209	rs72781699	0.409874	1.19863	0.732388
423	Television watching (excluded pleiotropic SNPs)	Lung cancer || id:ieu-a-966	ezQkco	ieu-a-966	27209	rs72828890	0.858916	1.59521	0.590277
424	Television watching (excluded pleiotropic SNPs)	Lung cancer || id:ieu-a-966	ezQkco	ieu-a-966	27209	rs72834698	2.33095	1.10548	0.0349841
425	Television watching (excluded pleiotropic SNPs)	Lung cancer || id:ieu-a-966	ezQkco	ieu-a-966	27209	rs74802478	2.12925	1.37624	0.121825
426	Television watching (excluded pleiotropic SNPs)	Lung cancer || id:ieu-a-966	ezQkco	ieu-a-966	27209	rs7564130	1.79054	1.2462	0.150775
427	Television watching (excluded pleiotropic SNPs)	Lung cancer || id:ieu-a-966	ezQkco	ieu-a-966	27209	rs7693703	-1.32318	1.33626	0.32207
428	Television watching (excluded pleiotropic SNPs)	Lung cancer || id:ieu-a-966	ezQkco	ieu-a-966	27209	rs7716447	3.1658	1.95523	0.105416
429	Television watching (excluded pleiotropic SNPs)	Lung cancer || id:ieu-a-966	ezQkco	ieu-a-966	27209	rs7788008	-1.73852	1.41477	0.219134
430	Television watching (excluded pleiotropic SNPs)	Lung cancer || id:ieu-a-966	ezQkco	ieu-a-966	27209	rs7834121	-0.467538	1.327	0.724593
431	Television watching (excluded pleiotropic SNPs)	Lung cancer || id:ieu-a-966	ezQkco	ieu-a-966	27209	rs9471333	0.533835	1.38777	0.700481
432	Television watching (excluded pleiotropic SNPs)	Lung cancer || id:ieu-a-966	ezQkco	ieu-a-966	27209	rs9563168	-0.918806	1.23722	0.457702
433	Television watching (excluded pleiotropic SNPs)	Lung cancer || id:ieu-a-966	ezQkco	ieu-a-966	27209	rs9569734	0.746321	1.28405	0.56109
434	Television watching (excluded pleiotropic SNPs)	Lung cancer || id:ieu-a-966	ezQkco	ieu-a-966	27209	rs984409	0.0879247	1.2414	0.943535
435	Television watching (excluded pleiotropic SNPs)	Lung cancer || id:ieu-a-966	ezQkco	ieu-a-966	27209	rs9867121	-0.759495	1.26932	0.549607
436	Television watching (excluded pleiotropic SNPs)	Lung cancer || id:ieu-a-966	ezQkco	ieu-a-966	27209	rs9902312	-1.17433	1.28067	0.359161
437	Television watching (excluded pleiotropic SNPs)	Lung cancer || id:ieu-a-966	ezQkco	ieu-a-966	27209	All - Inverse variance weighted	0.634026	0.180226	0.000434884
438	Television watching (excluded pleiotropic SNPs)	Lung cancer || id:ieu-a-966	ezQkco	ieu-a-966	27209	All - MR Egger	0.349217	0.816675	0.670349
439	Television watching (excluded pleiotropic SNPs)	Squamous cell lung cancer || id:ieu-a-967	ezQkco	ieu-a-967	18313	rs10041724	0.43576	1.89222	0.817866
440	Television watching (excluded pleiotropic SNPs)	Squamous cell lung cancer || id:ieu-a-967	ezQkco	ieu-a-967	18313	rs10054327	-0.400574	1.64929	0.808101
441	Television watching (excluded pleiotropic SNPs)	Squamous cell lung cancer || id:ieu-a-967	ezQkco	ieu-a-967	18313	rs1031423	-0.345182	1.88579	0.854764
442	Television watching (excluded pleiotropic SNPs)	Squamous cell lung cancer || id:ieu-a-967	ezQkco	ieu-a-967	18313	rs10771746	-0.830164	2.14621	0.698901
443	Television watching (excluded pleiotropic SNPs)	Squamous cell lung cancer || id:ieu-a-967	ezQkco	ieu-a-967	18313	rs10932837	-2.18588	2.15138	0.309614
444	Television watching (excluded pleiotropic SNPs)	Squamous cell lung cancer || id:ieu-a-967	ezQkco	ieu-a-967	18313	rs10947452	-0.401196	2.07007	0.846326
445	Television watching (excluded pleiotropic SNPs)	Squamous cell lung cancer || id:ieu-a-967	ezQkco	ieu-a-967	18313	rs11130793	-0.824262	2.16785	0.703781
446	Television watching (excluded pleiotropic SNPs)	Squamous cell lung cancer || id:ieu-a-967	ezQkco	ieu-a-967	18313	rs11218575	4.51717	1.7704	0.0107261
447	Television watching (excluded pleiotropic SNPs)	Squamous cell lung cancer || id:ieu-a-967	ezQkco	ieu-a-967	18313	rs11245482	2.79128	2.24438	0.213621
448	Television watching (excluded pleiotropic SNPs)	Squamous cell lung cancer || id:ieu-a-967	ezQkco	ieu-a-967	18313	rs114720649	-1.2887	2.56321	0.615128
449	Television watching (excluded pleiotropic SNPs)	Squamous cell lung cancer || id:ieu-a-967	ezQkco	ieu-a-967	18313	rs11917871	-0.422479	1.694	0.803053
450	Television watching (excluded pleiotropic SNPs)	Squamous cell lung cancer || id:ieu-a-967	ezQkco	ieu-a-967	18313	rs12105701	2.93115	2.09592	0.161963
451	Television watching (excluded pleiotropic SNPs)	Squamous cell lung cancer || id:ieu-a-967	ezQkco	ieu-a-967	18313	rs12342024	-0.15702	1.97148	0.936519
452	Television watching (excluded pleiotropic SNPs)	Squamous cell lung cancer || id:ieu-a-967	ezQkco	ieu-a-967	18313	rs12491503	-3.25304	1.97843	0.100124
453	Television watching (excluded pleiotropic SNPs)	Squamous cell lung cancer || id:ieu-a-967	ezQkco	ieu-a-967	18313	rs1451533	0.295364	1.96325	0.880412
454	Television watching (excluded pleiotropic SNPs)	Squamous cell lung cancer || id:ieu-a-967	ezQkco	ieu-a-967	18313	rs148544378	-0.388611	2.51983	0.877435
455	Television watching (excluded pleiotropic SNPs)	Squamous cell lung cancer || id:ieu-a-967	ezQkco	ieu-a-967	18313	rs148648822	1.40075	2.30822	0.543949
456	Television watching (excluded pleiotropic SNPs)	Squamous cell lung cancer || id:ieu-a-967	ezQkco	ieu-a-967	18313	rs17207890	3.55827	1.73463	0.0402359
457	Television watching (excluded pleiotropic SNPs)	Squamous cell lung cancer || id:ieu-a-967	ezQkco	ieu-a-967	18313	rs17727474	2.71727	1.87994	0.148345
458	Television watching (excluded pleiotropic SNPs)	Squamous cell lung cancer || id:ieu-a-967	ezQkco	ieu-a-967	18313	rs17789218	0.685126	1.71842	0.690118
459	Television watching (excluded pleiotropic SNPs)	Squamous cell lung cancer || id:ieu-a-967	ezQkco	ieu-a-967	18313	rs182355396	1.13357	1.77392	0.52281
460	Television watching (excluded pleiotropic SNPs)	Squamous cell lung cancer || id:ieu-a-967	ezQkco	ieu-a-967	18313	rs2034768	0.8697	1.86073	0.640216
461	Television watching (excluded pleiotropic SNPs)	Squamous cell lung cancer || id:ieu-a-967	ezQkco	ieu-a-967	18313	rs2073869	-1.53646	1.83953	0.403579
462	Television watching (excluded pleiotropic SNPs)	Squamous cell lung cancer || id:ieu-a-967	ezQkco	ieu-a-967	18313	rs2173650	2.15071	2.16233	0.319919
463	Television watching (excluded pleiotropic SNPs)	Squamous cell lung cancer || id:ieu-a-967	ezQkco	ieu-a-967	18313	rs2184364	1.16135	2.02588	0.56647
464	Television watching (excluded pleiotropic SNPs)	Squamous cell lung cancer || id:ieu-a-967	ezQkco	ieu-a-967	18313	rs2291681	0.198641	2.12462	0.92551
465	Television watching (excluded pleiotropic SNPs)	Squamous cell lung cancer || id:ieu-a-967	ezQkco	ieu-a-967	18313	rs2460	-1.11385	2.11107	0.597759
466	Television watching (excluded pleiotropic SNPs)	Squamous cell lung cancer || id:ieu-a-967	ezQkco	ieu-a-967	18313	rs2971640	4.42081	2.22185	0.046624
467	Television watching (excluded pleiotropic SNPs)	Squamous cell lung cancer || id:ieu-a-967	ezQkco	ieu-a-967	18313	rs303753	3.77429	2.17714	0.0829898
468	Television watching (excluded pleiotropic SNPs)	Squamous cell lung cancer || id:ieu-a-967	ezQkco	ieu-a-967	18313	rs34811474	4.36325	2.64233	0.0986798
469	Television watching (excluded pleiotropic SNPs)	Squamous cell lung cancer || id:ieu-a-967	ezQkco	ieu-a-967	18313	rs34864022	1.1548	2.19073	0.598105
470	Television watching (excluded pleiotropic SNPs)	Squamous cell lung cancer || id:ieu-a-967	ezQkco	ieu-a-967	18313	rs374722	0.997138	1.61142	0.536051
471	Television watching (excluded pleiotropic SNPs)	Squamous cell lung cancer || id:ieu-a-967	ezQkco	ieu-a-967	18313	rs4382592	6.21371	2.28807	0.00661359
472	Television watching (excluded pleiotropic SNPs)	Squamous cell lung cancer || id:ieu-a-967	ezQkco	ieu-a-967	18313	rs4577309	5.22478	1.85769	0.00491556
473	Television watching (excluded pleiotropic SNPs)	Squamous cell lung cancer || id:ieu-a-967	ezQkco	ieu-a-967	18313	rs4845364	0.782307	1.8048	0.664681
474	Television watching (excluded pleiotropic SNPs)	Squamous cell lung cancer || id:ieu-a-967	ezQkco	ieu-a-967	18313	rs4973576	0.70316	2.02707	0.728677
475	Television watching (excluded pleiotropic SNPs)	Squamous cell lung cancer || id:ieu-a-967	ezQkco	ieu-a-967	18313	rs553397860	-2.02356	2.29824	0.378597
476	Television watching (excluded pleiotropic SNPs)	Squamous cell lung cancer || id:ieu-a-967	ezQkco	ieu-a-967	18313	rs56103247	1.48722	2.29503	0.516973
477	Television watching (excluded pleiotropic SNPs)	Squamous cell lung cancer || id:ieu-a-967	ezQkco	ieu-a-967	18313	rs56398417	-3.31651	2.30886	0.15088
478	Television watching (excluded pleiotropic SNPs)	Squamous cell lung cancer || id:ieu-a-967	ezQkco	ieu-a-967	18313	rs56858768	-0.957987	1.97093	0.626926
479	Television watching (excluded pleiotropic SNPs)	Squamous cell lung cancer || id:ieu-a-967	ezQkco	ieu-a-967	18313	rs57585211	0.497304	2.20071	0.821221
480	Television watching (excluded pleiotropic SNPs)	Squamous cell lung cancer || id:ieu-a-967	ezQkco	ieu-a-967	18313	rs6131281	-3.26134	1.82787	0.0743868
481	Television watching (excluded pleiotropic SNPs)	Squamous cell lung cancer || id:ieu-a-967	ezQkco	ieu-a-967	18313	rs62379379	3.82018	2.20115	0.0826457
482	Television watching (excluded pleiotropic SNPs)	Squamous cell lung cancer || id:ieu-a-967	ezQkco	ieu-a-967	18313	rs62641636	2.73239	2.1535	0.204508
483	Television watching (excluded pleiotropic SNPs)	Squamous cell lung cancer || id:ieu-a-967	ezQkco	ieu-a-967	18313	rs6472942	1.13853	2.16015	0.598152
484	Television watching (excluded pleiotropic SNPs)	Squamous cell lung cancer || id:ieu-a-967	ezQkco	ieu-a-967	18313	rs66852340	0.06585	1.83878	0.971432
485	Television watching (excluded pleiotropic SNPs)	Squamous cell lung cancer || id:ieu-a-967	ezQkco	ieu-a-967	18313	rs6721975	3.47095	1.96424	0.077216
486	Television watching (excluded pleiotropic SNPs)	Squamous cell lung cancer || id:ieu-a-967	ezQkco	ieu-a-967	18313	rs6797840	-1.34076	1.74919	0.443375
487	Television watching (excluded pleiotropic SNPs)	Squamous cell lung cancer || id:ieu-a-967	ezQkco	ieu-a-967	18313	rs6825241	-1.2237	1.56982	0.435677
488	Television watching (excluded pleiotropic SNPs)	Squamous cell lung cancer || id:ieu-a-967	ezQkco	ieu-a-967	18313	rs6850494	1.01046	2.065	0.624609
489	Television watching (excluded pleiotropic SNPs)	Squamous cell lung cancer || id:ieu-a-967	ezQkco	ieu-a-967	18313	rs7184800	-0.809753	1.78447	0.649989
490	Television watching (excluded pleiotropic SNPs)	Squamous cell lung cancer || id:ieu-a-967	ezQkco	ieu-a-967	18313	rs72725224	-2.55139	2.05196	0.213723
491	Television watching (excluded pleiotropic SNPs)	Squamous cell lung cancer || id:ieu-a-967	ezQkco	ieu-a-967	18313	rs72781699	-1.27522	1.79479	0.477386
492	Television watching (excluded pleiotropic SNPs)	Squamous cell lung cancer || id:ieu-a-967	ezQkco	ieu-a-967	18313	rs72828890	-1.22171	2.549	0.631732
493	Television watching (excluded pleiotropic SNPs)	Squamous cell lung cancer || id:ieu-a-967	ezQkco	ieu-a-967	18313	rs72834698	3.07057	1.66291	0.0648196
494	Television watching (excluded pleiotropic SNPs)	Squamous cell lung cancer || id:ieu-a-967	ezQkco	ieu-a-967	18313	rs74802478	4.01502	2.06918	0.0523318
495	Television watching (excluded pleiotropic SNPs)	Squamous cell lung cancer || id:ieu-a-967	ezQkco	ieu-a-967	18313	rs7564130	3.01957	1.94493	0.120535
496	Television watching (excluded pleiotropic SNPs)	Squamous cell lung cancer || id:ieu-a-967	ezQkco	ieu-a-967	18313	rs7693703	-2.1129	2.076	0.308784
497	Television watching (excluded pleiotropic SNPs)	Squamous cell lung cancer || id:ieu-a-967	ezQkco	ieu-a-967	18313	rs7716447	3.9369	3.05069	0.196879
498	Television watching (excluded pleiotropic SNPs)	Squamous cell lung cancer || id:ieu-a-967	ezQkco	ieu-a-967	18313	rs7788008	-1.69089	2.17146	0.436163
499	Television watching (excluded pleiotropic SNPs)	Squamous cell lung cancer || id:ieu-a-967	ezQkco	ieu-a-967	18313	rs7834121	-2.6443	2.09586	0.207064
500	Television watching (excluded pleiotropic SNPs)	Squamous cell lung cancer || id:ieu-a-967	ezQkco	ieu-a-967	18313	rs9471333	0.358931	2.11531	0.86526
501	Television watching (excluded pleiotropic SNPs)	Squamous cell lung cancer || id:ieu-a-967	ezQkco	ieu-a-967	18313	rs9563168	-2.37021	1.94444	0.222857
502	Television watching (excluded pleiotropic SNPs)	Squamous cell lung cancer || id:ieu-a-967	ezQkco	ieu-a-967	18313	rs9569734	-2.07417	2.05447	0.312694
503	Television watching (excluded pleiotropic SNPs)	Squamous cell lung cancer || id:ieu-a-967	ezQkco	ieu-a-967	18313	rs984409	-0.838967	1.92193	0.662458
504	Television watching (excluded pleiotropic SNPs)	Squamous cell lung cancer || id:ieu-a-967	ezQkco	ieu-a-967	18313	rs9867121	-0.895084	1.95837	0.647631
505	Television watching (excluded pleiotropic SNPs)	Squamous cell lung cancer || id:ieu-a-967	ezQkco	ieu-a-967	18313	rs9902312	-2.30554	1.99127	0.246935
506	Television watching (excluded pleiotropic SNPs)	Squamous cell lung cancer || id:ieu-a-967	ezQkco	ieu-a-967	18313	All - Inverse variance weighted	0.471725	0.275534	0.0868897
507	Television watching (excluded pleiotropic SNPs)	Squamous cell lung cancer || id:ieu-a-967	ezQkco	ieu-a-967	18313	All - MR Egger	-0.0466013	1.24373	0.970226
508	Television watching (excluded education SNPs)	Lung adenocarcinoma || id:ieu-a-965	h8Mp56	ieu-a-965	18336	rs10041724	4.37085	1.77656	0.0138823
509	Television watching (excluded education SNPs)	Lung adenocarcinoma || id:ieu-a-965	h8Mp56	ieu-a-965	18336	rs10054327	-0.440873	1.65859	0.790384
510	Television watching (excluded education SNPs)	Lung adenocarcinoma || id:ieu-a-965	h8Mp56	ieu-a-965	18336	rs10189857	0.984545	1.41565	0.48676
511	Television watching (excluded education SNPs)	Lung adenocarcinoma || id:ieu-a-965	h8Mp56	ieu-a-965	18336	rs1031423	-0.601811	1.83268	0.742627
512	Television watching (excluded education SNPs)	Lung adenocarcinoma || id:ieu-a-965	h8Mp56	ieu-a-965	18336	rs10771746	6.1526	2.35957	0.00912041
513	Television watching (excluded education SNPs)	Lung adenocarcinoma || id:ieu-a-965	h8Mp56	ieu-a-965	18336	rs10876864	-0.0701987	2.137	0.973795
514	Television watching (excluded education SNPs)	Lung adenocarcinoma || id:ieu-a-965	h8Mp56	ieu-a-965	18336	rs10932837	0.576152	2.077	0.781476
515	Television watching (excluded education SNPs)	Lung adenocarcinoma || id:ieu-a-965	h8Mp56	ieu-a-965	18336	rs10947452	-1.41449	2.03407	0.486807
516	Television watching (excluded education SNPs)	Lung adenocarcinoma || id:ieu-a-965	h8Mp56	ieu-a-965	18336	rs11130793	1.59504	2.11092	0.449882
517	Television watching (excluded education SNPs)	Lung adenocarcinoma || id:ieu-a-965	h8Mp56	ieu-a-965	18336	rs111901094	-3.34977	2.39182	0.161361
518	Television watching (excluded education SNPs)	Lung adenocarcinoma || id:ieu-a-965	h8Mp56	ieu-a-965	18336	rs11218575	0.777587	1.85453	0.675004
519	Television watching (excluded education SNPs)	Lung adenocarcinoma || id:ieu-a-965	h8Mp56	ieu-a-965	18336	rs11245482	1.52698	2.21677	0.49093
520	Television watching (excluded education SNPs)	Lung adenocarcinoma || id:ieu-a-965	h8Mp56	ieu-a-965	18336	rs114720649	-0.531256	2.5745	0.836515
521	Television watching (excluded education SNPs)	Lung adenocarcinoma || id:ieu-a-965	h8Mp56	ieu-a-965	18336	rs11917871	0.298639	1.66147	0.857354
522	Television watching (excluded education SNPs)	Lung adenocarcinoma || id:ieu-a-965	h8Mp56	ieu-a-965	18336	rs12105701	1.84015	2.10415	0.38183
523	Television watching (excluded education SNPs)	Lung adenocarcinoma || id:ieu-a-965	h8Mp56	ieu-a-965	18336	rs12342024	0.907348	2.0911	0.664354
524	Television watching (excluded education SNPs)	Lung adenocarcinoma || id:ieu-a-965	h8Mp56	ieu-a-965	18336	rs1243182	2.15491	1.58842	0.174897
525	Television watching (excluded education SNPs)	Lung adenocarcinoma || id:ieu-a-965	h8Mp56	ieu-a-965	18336	rs12491503	1.22473	2.08879	0.55765
526	Television watching (excluded education SNPs)	Lung adenocarcinoma || id:ieu-a-965	h8Mp56	ieu-a-965	18336	rs13107325	0.827914	1.76845	0.639671
527	Television watching (excluded education SNPs)	Lung adenocarcinoma || id:ieu-a-965	h8Mp56	ieu-a-965	18336	rs1451533	0.555834	2.00294	0.781389
528	Television watching (excluded education SNPs)	Lung adenocarcinoma || id:ieu-a-965	h8Mp56	ieu-a-965	18336	rs148544378	0.45383	2.37215	0.848278
529	Television watching (excluded education SNPs)	Lung adenocarcinoma || id:ieu-a-965	h8Mp56	ieu-a-965	18336	rs148648822	-3.11711	2.15389	0.147841
530	Television watching (excluded education SNPs)	Lung adenocarcinoma || id:ieu-a-965	h8Mp56	ieu-a-965	18336	rs17207890	4.82822	1.684	0.00414235
531	Television watching (excluded education SNPs)	Lung adenocarcinoma || id:ieu-a-965	h8Mp56	ieu-a-965	18336	rs17727474	3.0521	1.8745	0.103478
532	Television watching (excluded education SNPs)	Lung adenocarcinoma || id:ieu-a-965	h8Mp56	ieu-a-965	18336	rs17789218	-0.907653	1.738	0.601503
533	Television watching (excluded education SNPs)	Lung adenocarcinoma || id:ieu-a-965	h8Mp56	ieu-a-965	18336	rs182355396	2.74409	1.9552	0.160473
534	Television watching (excluded education SNPs)	Lung adenocarcinoma || id:ieu-a-965	h8Mp56	ieu-a-965	18336	rs2034768	1.07889	1.87	0.563977
535	Television watching (excluded education SNPs)	Lung adenocarcinoma || id:ieu-a-965	h8Mp56	ieu-a-965	18336	rs2045147	0.272977	2.11885	0.89749
536	Television watching (excluded education SNPs)	Lung adenocarcinoma || id:ieu-a-965	h8Mp56	ieu-a-965	18336	rs2073869	-1.39898	1.88195	0.457259
537	Television watching (excluded education SNPs)	Lung adenocarcinoma || id:ieu-a-965	h8Mp56	ieu-a-965	18336	rs2173650	0.665528	2.17617	0.759737
538	Television watching (excluded education SNPs)	Lung adenocarcinoma || id:ieu-a-965	h8Mp56	ieu-a-965	18336	rs2184364	3.81384	1.972	0.0531134
539	Television watching (excluded education SNPs)	Lung adenocarcinoma || id:ieu-a-965	h8Mp56	ieu-a-965	18336	rs2291681	-0.258182	2.13569	0.903779
540	Television watching (excluded education SNPs)	Lung adenocarcinoma || id:ieu-a-965	h8Mp56	ieu-a-965	18336	rs2447098	0.594577	1.8442	0.747147
541	Television watching (excluded education SNPs)	Lung adenocarcinoma || id:ieu-a-965	h8Mp56	ieu-a-965	18336	rs2460	-3.59494	2.03633	0.0774968
542	Television watching (excluded education SNPs)	Lung adenocarcinoma || id:ieu-a-965	h8Mp56	ieu-a-965	18336	rs2584597	-1.16797	2.1512	0.587171
543	Television watching (excluded education SNPs)	Lung adenocarcinoma || id:ieu-a-965	h8Mp56	ieu-a-965	18336	rs263771	1.20211	2.04888	0.557396
544	Television watching (excluded education SNPs)	Lung adenocarcinoma || id:ieu-a-965	h8Mp56	ieu-a-965	18336	rs2971640	2.81902	2.17323	0.194578
545	Television watching (excluded education SNPs)	Lung adenocarcinoma || id:ieu-a-965	h8Mp56	ieu-a-965	18336	rs303753	0.282014	2.07507	0.891896
546	Television watching (excluded education SNPs)	Lung adenocarcinoma || id:ieu-a-965	h8Mp56	ieu-a-965	18336	rs34811474	-0.881347	2.86913	0.758705
547	Television watching (excluded education SNPs)	Lung adenocarcinoma || id:ieu-a-965	h8Mp56	ieu-a-965	18336	rs34864022	-0.340425	2.14846	0.874102
548	Television watching (excluded education SNPs)	Lung adenocarcinoma || id:ieu-a-965	h8Mp56	ieu-a-965	18336	rs374722	0.450842	1.58796	0.776477
549	Television watching (excluded education SNPs)	Lung adenocarcinoma || id:ieu-a-965	h8Mp56	ieu-a-965	18336	rs4382592	2.40354	2.16943	0.2679
550	Television watching (excluded education SNPs)	Lung adenocarcinoma || id:ieu-a-965	h8Mp56	ieu-a-965	18336	rs4577309	2.79631	1.78869	0.117975
551	Television watching (excluded education SNPs)	Lung adenocarcinoma || id:ieu-a-965	h8Mp56	ieu-a-965	18336	rs4845364	1.41961	1.79	0.427733
552	Television watching (excluded education SNPs)	Lung adenocarcinoma || id:ieu-a-965	h8Mp56	ieu-a-965	18336	rs4973576	0.123181	2.0482	0.952043
553	Television watching (excluded education SNPs)	Lung adenocarcinoma || id:ieu-a-965	h8Mp56	ieu-a-965	18336	rs553397860	-0.699006	2.25782	0.756871
554	Television watching (excluded education SNPs)	Lung adenocarcinoma || id:ieu-a-965	h8Mp56	ieu-a-965	18336	rs56103247	3.04694	2.1787	0.161959
555	Television watching (excluded education SNPs)	Lung adenocarcinoma || id:ieu-a-965	h8Mp56	ieu-a-965	18336	rs56398417	-1.45529	2.24986	0.517739
556	Television watching (excluded education SNPs)	Lung adenocarcinoma || id:ieu-a-965	h8Mp56	ieu-a-965	18336	rs56858768	0.380578	2.03113	0.851369
557	Television watching (excluded education SNPs)	Lung adenocarcinoma || id:ieu-a-965	h8Mp56	ieu-a-965	18336	rs57585211	2.55336	2.23588	0.253458
558	Television watching (excluded education SNPs)	Lung adenocarcinoma || id:ieu-a-965	h8Mp56	ieu-a-965	18336	rs6131281	-1.71044	1.78506	0.337963
559	Television watching (excluded education SNPs)	Lung adenocarcinoma || id:ieu-a-965	h8Mp56	ieu-a-965	18336	rs6141814	0.400163	2.02993	0.843725
560	Television watching (excluded education SNPs)	Lung adenocarcinoma || id:ieu-a-965	h8Mp56	ieu-a-965	18336	rs62332760	-0.234671	2.02507	0.907746
561	Television watching (excluded education SNPs)	Lung adenocarcinoma || id:ieu-a-965	h8Mp56	ieu-a-965	18336	rs62379379	3.22395	2.26942	0.155433
562	Television watching (excluded education SNPs)	Lung adenocarcinoma || id:ieu-a-965	h8Mp56	ieu-a-965	18336	rs62641636	1.90804	2.18329	0.382155
563	Television watching (excluded education SNPs)	Lung adenocarcinoma || id:ieu-a-965	h8Mp56	ieu-a-965	18336	rs6472942	-0.815462	2.09685	0.697351
564	Television watching (excluded education SNPs)	Lung adenocarcinoma || id:ieu-a-965	h8Mp56	ieu-a-965	18336	rs648044	3.34901	2.13264	0.116332
565	Television watching (excluded education SNPs)	Lung adenocarcinoma || id:ieu-a-965	h8Mp56	ieu-a-965	18336	rs6673341	2.11665	1.7656	0.230596
566	Television watching (excluded education SNPs)	Lung adenocarcinoma || id:ieu-a-965	h8Mp56	ieu-a-965	18336	rs66852340	1.61469	1.89389	0.393891
567	Television watching (excluded education SNPs)	Lung adenocarcinoma || id:ieu-a-965	h8Mp56	ieu-a-965	18336	rs6721975	0.6601	2.05512	0.74806
568	Television watching (excluded education SNPs)	Lung adenocarcinoma || id:ieu-a-965	h8Mp56	ieu-a-965	18336	rs6797840	0.147173	1.70719	0.931301
569	Television watching (excluded education SNPs)	Lung adenocarcinoma || id:ieu-a-965	h8Mp56	ieu-a-965	18336	rs6825241	1.09654	1.63706	0.50297
570	Television watching (excluded education SNPs)	Lung adenocarcinoma || id:ieu-a-965	h8Mp56	ieu-a-965	18336	rs6850494	2.95893	2.11943	0.162685
571	Television watching (excluded education SNPs)	Lung adenocarcinoma || id:ieu-a-965	h8Mp56	ieu-a-965	18336	rs7184800	-0.563586	1.76335	0.749264
572	Television watching (excluded education SNPs)	Lung adenocarcinoma || id:ieu-a-965	h8Mp56	ieu-a-965	18336	rs7248205	-0.177864	2.09157	0.932231
573	Television watching (excluded education SNPs)	Lung adenocarcinoma || id:ieu-a-965	h8Mp56	ieu-a-965	18336	rs72725224	-1.6226	2.02443	0.422838
574	Television watching (excluded education SNPs)	Lung adenocarcinoma || id:ieu-a-965	h8Mp56	ieu-a-965	18336	rs72781699	0.651163	1.82626	0.721425
575	Television watching (excluded education SNPs)	Lung adenocarcinoma || id:ieu-a-965	h8Mp56	ieu-a-965	18336	rs72828890	0.762068	2.47426	0.758084
576	Television watching (excluded education SNPs)	Lung adenocarcinoma || id:ieu-a-965	h8Mp56	ieu-a-965	18336	rs72834698	1.4736	1.72839	0.393888
577	Television watching (excluded education SNPs)	Lung adenocarcinoma || id:ieu-a-965	h8Mp56	ieu-a-965	18336	rs74802478	2.15365	2.10224	0.305619
578	Television watching (excluded education SNPs)	Lung adenocarcinoma || id:ieu-a-965	h8Mp56	ieu-a-965	18336	rs749671	0.297959	1.75956	0.865531
579	Television watching (excluded education SNPs)	Lung adenocarcinoma || id:ieu-a-965	h8Mp56	ieu-a-965	18336	rs7564130	0.581721	1.8874	0.75792
580	Television watching (excluded education SNPs)	Lung adenocarcinoma || id:ieu-a-965	h8Mp56	ieu-a-965	18336	rs7693703	-2.92737	2.1007	0.163461
581	Television watching (excluded education SNPs)	Lung adenocarcinoma || id:ieu-a-965	h8Mp56	ieu-a-965	18336	rs7716447	-1.07837	2.833	0.703466
582	Television watching (excluded education SNPs)	Lung adenocarcinoma || id:ieu-a-965	h8Mp56	ieu-a-965	18336	rs7788008	-2.86691	2.20146	0.192822
583	Television watching (excluded education SNPs)	Lung adenocarcinoma || id:ieu-a-965	h8Mp56	ieu-a-965	18336	rs7834121	2.67044	1.94657	0.170104
584	Television watching (excluded education SNPs)	Lung adenocarcinoma || id:ieu-a-965	h8Mp56	ieu-a-965	18336	rs78394231	0.0856371	2.16848	0.968498
585	Television watching (excluded education SNPs)	Lung adenocarcinoma || id:ieu-a-965	h8Mp56	ieu-a-965	18336	rs801733	-2.45014	1.75012	0.161517
586	Television watching (excluded education SNPs)	Lung adenocarcinoma || id:ieu-a-965	h8Mp56	ieu-a-965	18336	rs8756	-1.39693	2.14854	0.515578
587	Television watching (excluded education SNPs)	Lung adenocarcinoma || id:ieu-a-965	h8Mp56	ieu-a-965	18336	rs9471333	0.551785	2.125	0.795123
588	Television watching (excluded education SNPs)	Lung adenocarcinoma || id:ieu-a-965	h8Mp56	ieu-a-965	18336	rs9563168	-2.24097	1.91928	0.242964
589	Television watching (excluded education SNPs)	Lung adenocarcinoma || id:ieu-a-965	h8Mp56	ieu-a-965	18336	rs9569734	1.33306	1.95153	0.494553
590	Television watching (excluded education SNPs)	Lung adenocarcinoma || id:ieu-a-965	h8Mp56	ieu-a-965	18336	rs9834970	-2.56625	2.16	0.234802
591	Television watching (excluded education SNPs)	Lung adenocarcinoma || id:ieu-a-965	h8Mp56	ieu-a-965	18336	rs984409	-0.041587	1.9014	0.98255
592	Television watching (excluded education SNPs)	Lung adenocarcinoma || id:ieu-a-965	h8Mp56	ieu-a-965	18336	rs9867121	-1.15966	1.938	0.549587
593	Television watching (excluded education SNPs)	Lung adenocarcinoma || id:ieu-a-965	h8Mp56	ieu-a-965	18336	rs9902312	-1.14465	1.9452	0.55623
594	Television watching (excluded education SNPs)	Lung adenocarcinoma || id:ieu-a-965	h8Mp56	ieu-a-965	18336	All - Inverse variance weighted	0.562753	0.2132	0.00830142
595	Television watching (excluded education SNPs)	Lung adenocarcinoma || id:ieu-a-965	h8Mp56	ieu-a-965	18336	All - MR Egger	0.91545	1.00477	0.364848
596	Television watching (excluded education SNPs)	Lung cancer || id:ieu-a-966	h8Mp56	ieu-a-966	27209	rs10041724	1.70008	1.21389	0.161356
597	Television watching (excluded education SNPs)	Lung cancer || id:ieu-a-966	h8Mp56	ieu-a-966	27209	rs10054327	0.0523174	1.07159	0.961061
598	Television watching (excluded education SNPs)	Lung cancer || id:ieu-a-966	h8Mp56	ieu-a-966	27209	rs10189857	1.66206	0.9288	0.0735382
599	Television watching (excluded education SNPs)	Lung cancer || id:ieu-a-966	h8Mp56	ieu-a-966	27209	rs1031423	-1.33718	1.23205	0.277775
600	Television watching (excluded education SNPs)	Lung cancer || id:ieu-a-966	h8Mp56	ieu-a-966	27209	rs10771746	2.73861	1.46907	0.062297
601	Television watching (excluded education SNPs)	Lung cancer || id:ieu-a-966	h8Mp56	ieu-a-966	27209	rs10876864	2.3025	1.35185	0.0885257
602	Television watching (excluded education SNPs)	Lung cancer || id:ieu-a-966	h8Mp56	ieu-a-966	27209	rs10932837	0.0812738	1.36738	0.952604
603	Television watching (excluded education SNPs)	Lung cancer || id:ieu-a-966	h8Mp56	ieu-a-966	27209	rs10947452	0.0514101	1.36171	0.969884
604	Television watching (excluded education SNPs)	Lung cancer || id:ieu-a-966	h8Mp56	ieu-a-966	27209	rs11130793	-0.0159983	1.40238	0.990898
605	Television watching (excluded education SNPs)	Lung cancer || id:ieu-a-966	h8Mp56	ieu-a-966	27209	rs111901094	-1.62506	1.61647	0.314744
606	Television watching (excluded education SNPs)	Lung cancer || id:ieu-a-966	h8Mp56	ieu-a-966	27209	rs11218575	1.73135	1.1934	0.146843
607	Television watching (excluded education SNPs)	Lung cancer || id:ieu-a-966	h8Mp56	ieu-a-966	27209	rs11245482	1.37684	1.44338	0.340136
608	Television watching (excluded education SNPs)	Lung cancer || id:ieu-a-966	h8Mp56	ieu-a-966	27209	rs114720649	-1.34159	1.66643	0.420779
609	Television watching (excluded education SNPs)	Lung cancer || id:ieu-a-966	h8Mp56	ieu-a-966	27209	rs11917871	-0.294848	1.09882	0.788445
610	Television watching (excluded education SNPs)	Lung cancer || id:ieu-a-966	h8Mp56	ieu-a-966	27209	rs12105701	2.90685	1.36623	0.0333665
611	Television watching (excluded education SNPs)	Lung cancer || id:ieu-a-966	h8Mp56	ieu-a-966	27209	rs12342024	0.541338	1.33681	0.685516
612	Television watching (excluded education SNPs)	Lung cancer || id:ieu-a-966	h8Mp56	ieu-a-966	27209	rs1243182	0.531205	1.00626	0.597569
613	Television watching (excluded education SNPs)	Lung cancer || id:ieu-a-966	h8Mp56	ieu-a-966	27209	rs12491503	1.22494	1.36457	0.369361
614	Television watching (excluded education SNPs)	Lung cancer || id:ieu-a-966	h8Mp56	ieu-a-966	27209	rs13107325	1.59778	1.22497	0.192115
615	Television watching (excluded education SNPs)	Lung cancer || id:ieu-a-966	h8Mp56	ieu-a-966	27209	rs1451533	1.30203	1.30412	0.318088
616	Television watching (excluded education SNPs)	Lung cancer || id:ieu-a-966	h8Mp56	ieu-a-966	27209	rs148544378	1.19908	1.51749	0.429426
617	Television watching (excluded education SNPs)	Lung cancer || id:ieu-a-966	h8Mp56	ieu-a-966	27209	rs148648822	-0.43716	1.45928	0.764503
618	Television watching (excluded education SNPs)	Lung cancer || id:ieu-a-966	h8Mp56	ieu-a-966	27209	rs17207890	3.13594	1.13456	0.00570965
619	Television watching (excluded education SNPs)	Lung cancer || id:ieu-a-966	h8Mp56	ieu-a-966	27209	rs17727474	1.80897	1.25211	0.148533
620	Television watching (excluded education SNPs)	Lung cancer || id:ieu-a-966	h8Mp56	ieu-a-966	27209	rs17789218	0.600784	1.11284	0.58929
621	Television watching (excluded education SNPs)	Lung cancer || id:ieu-a-966	h8Mp56	ieu-a-966	27209	rs182355396	1.54564	1.1908	0.194293
622	Television watching (excluded education SNPs)	Lung cancer || id:ieu-a-966	h8Mp56	ieu-a-966	27209	rs2034768	0.275364	1.2036	0.819037
623	Television watching (excluded education SNPs)	Lung cancer || id:ieu-a-966	h8Mp56	ieu-a-966	27209	rs2045147	2.89832	1.43131	0.0428727
624	Television watching (excluded education SNPs)	Lung cancer || id:ieu-a-966	h8Mp56	ieu-a-966	27209	rs2073869	0.182315	1.18611	0.877839
625	Television watching (excluded education SNPs)	Lung cancer || id:ieu-a-966	h8Mp56	ieu-a-966	27209	rs2173650	1.64454	1.4135	0.244645
626	Television watching (excluded education SNPs)	Lung cancer || id:ieu-a-966	h8Mp56	ieu-a-966	27209	rs2184364	0.666412	1.33794	0.618421
627	Television watching (excluded education SNPs)	Lung cancer || id:ieu-a-966	h8Mp56	ieu-a-966	27209	rs2291681	0.370429	1.383	0.788819
628	Television watching (excluded education SNPs)	Lung cancer || id:ieu-a-966	h8Mp56	ieu-a-966	27209	rs2447098	2.25656	1.1728	0.0543447
629	Television watching (excluded education SNPs)	Lung cancer || id:ieu-a-966	h8Mp56	ieu-a-966	27209	rs2460	-3.42643	1.3272	0.00983148
630	Television watching (excluded education SNPs)	Lung cancer || id:ieu-a-966	h8Mp56	ieu-a-966	27209	rs2584597	0.00220003	1.37547	0.998724
631	Television watching (excluded education SNPs)	Lung cancer || id:ieu-a-966	h8Mp56	ieu-a-966	27209	rs263771	1.96044	1.33065	0.140672
632	Television watching (excluded education SNPs)	Lung cancer || id:ieu-a-966	h8Mp56	ieu-a-966	27209	rs2971640	2.88721	1.417	0.041595
633	Television watching (excluded education SNPs)	Lung cancer || id:ieu-a-966	h8Mp56	ieu-a-966	27209	rs303753	2.17525	1.388	0.117072
634	Television watching (excluded education SNPs)	Lung cancer || id:ieu-a-966	h8Mp56	ieu-a-966	27209	rs34811474	2.82954	1.7652	0.108944
635	Television watching (excluded education SNPs)	Lung cancer || id:ieu-a-966	h8Mp56	ieu-a-966	27209	rs34864022	0.0965712	1.41727	0.945675
636	Television watching (excluded education SNPs)	Lung cancer || id:ieu-a-966	h8Mp56	ieu-a-966	27209	rs374722	0.273558	1.03846	0.792221
637	Television watching (excluded education SNPs)	Lung cancer || id:ieu-a-966	h8Mp56	ieu-a-966	27209	rs4382592	3.22501	1.44179	0.0252981
638	Television watching (excluded education SNPs)	Lung cancer || id:ieu-a-966	h8Mp56	ieu-a-966	27209	rs4577309	3.63532	1.18175	0.00209646
639	Television watching (excluded education SNPs)	Lung cancer || id:ieu-a-966	h8Mp56	ieu-a-966	27209	rs4845364	1.06974	1.1728	0.361703
640	Television watching (excluded education SNPs)	Lung cancer || id:ieu-a-966	h8Mp56	ieu-a-966	27209	rs4973576	-1.02186	1.3478	0.44835
641	Television watching (excluded education SNPs)	Lung cancer || id:ieu-a-966	h8Mp56	ieu-a-966	27209	rs553397860	-0.233243	1.46006	0.873079
642	Television watching (excluded education SNPs)	Lung cancer || id:ieu-a-966	h8Mp56	ieu-a-966	27209	rs56103247	1.4441	1.50003	0.335692
643	Television watching (excluded education SNPs)	Lung cancer || id:ieu-a-966	h8Mp56	ieu-a-966	27209	rs56398417	-1.80459	1.4675	0.218809
644	Television watching (excluded education SNPs)	Lung cancer || id:ieu-a-966	h8Mp56	ieu-a-966	27209	rs56858768	0.794647	1.32833	0.549688
645	Television watching (excluded education SNPs)	Lung cancer || id:ieu-a-966	h8Mp56	ieu-a-966	27209	rs57585211	0.969206	1.43994	0.500892
646	Television watching (excluded education SNPs)	Lung cancer || id:ieu-a-966	h8Mp56	ieu-a-966	27209	rs6131281	-2.15921	1.16781	0.0644676
647	Television watching (excluded education SNPs)	Lung cancer || id:ieu-a-966	h8Mp56	ieu-a-966	27209	rs6141814	1.78146	1.346	0.185663
648	Television watching (excluded education SNPs)	Lung cancer || id:ieu-a-966	h8Mp56	ieu-a-966	27209	rs62332760	-1.08223	1.30293	0.406193
649	Television watching (excluded education SNPs)	Lung cancer || id:ieu-a-966	h8Mp56	ieu-a-966	27209	rs62379379	3.51731	1.45319	0.0155034
650	Television watching (excluded education SNPs)	Lung cancer || id:ieu-a-966	h8Mp56	ieu-a-966	27209	rs62641636	2.06867	1.42136	0.145553
651	Television watching (excluded education SNPs)	Lung cancer || id:ieu-a-966	h8Mp56	ieu-a-966	27209	rs6472942	0.324238	1.39769	0.816553
652	Television watching (excluded education SNPs)	Lung cancer || id:ieu-a-966	h8Mp56	ieu-a-966	27209	rs648044	2.66274	1.39857	0.0569236
653	Television watching (excluded education SNPs)	Lung cancer || id:ieu-a-966	h8Mp56	ieu-a-966	27209	rs6673341	1.23205	1.1666	0.290922
654	Television watching (excluded education SNPs)	Lung cancer || id:ieu-a-966	h8Mp56	ieu-a-966	27209	rs66852340	-0.0188365	1.20228	0.9875
655	Television watching (excluded education SNPs)	Lung cancer || id:ieu-a-966	h8Mp56	ieu-a-966	27209	rs6721975	1.14957	1.32076	0.384091
656	Television watching (excluded education SNPs)	Lung cancer || id:ieu-a-966	h8Mp56	ieu-a-966	27209	rs6797840	-0.253983	1.11938	0.820504
657	Television watching (excluded education SNPs)	Lung cancer || id:ieu-a-966	h8Mp56	ieu-a-966	27209	rs6825241	0.933494	1.06824	0.382191
658	Television watching (excluded education SNPs)	Lung cancer || id:ieu-a-966	h8Mp56	ieu-a-966	27209	rs6850494	1.9623	1.35979	0.148994
659	Television watching (excluded education SNPs)	Lung cancer || id:ieu-a-966	h8Mp56	ieu-a-966	27209	rs7184800	-0.400457	1.15712	0.729281
660	Television watching (excluded education SNPs)	Lung cancer || id:ieu-a-966	h8Mp56	ieu-a-966	27209	rs7248205	-1.34043	1.34957	0.3206
661	Television watching (excluded education SNPs)	Lung cancer || id:ieu-a-966	h8Mp56	ieu-a-966	27209	rs72725224	-2.15632	1.39187	0.121328
662	Television watching (excluded education SNPs)	Lung cancer || id:ieu-a-966	h8Mp56	ieu-a-966	27209	rs72781699	0.409874	1.19863	0.732388
663	Television watching (excluded education SNPs)	Lung cancer || id:ieu-a-966	h8Mp56	ieu-a-966	27209	rs72828890	0.858916	1.59521	0.590277
664	Television watching (excluded education SNPs)	Lung cancer || id:ieu-a-966	h8Mp56	ieu-a-966	27209	rs72834698	2.33095	1.10548	0.0349841
665	Television watching (excluded education SNPs)	Lung cancer || id:ieu-a-966	h8Mp56	ieu-a-966	27209	rs74802478	2.12925	1.37624	0.121825
666	Television watching (excluded education SNPs)	Lung cancer || id:ieu-a-966	h8Mp56	ieu-a-966	27209	rs749671	1.86918	1.1255	0.0967635
667	Television watching (excluded education SNPs)	Lung cancer || id:ieu-a-966	h8Mp56	ieu-a-966	27209	rs7564130	1.79054	1.2462	0.150775
668	Television watching (excluded education SNPs)	Lung cancer || id:ieu-a-966	h8Mp56	ieu-a-966	27209	rs7693703	-1.32318	1.33626	0.32207
669	Television watching (excluded education SNPs)	Lung cancer || id:ieu-a-966	h8Mp56	ieu-a-966	27209	rs7716447	3.1658	1.95523	0.105416
670	Television watching (excluded education SNPs)	Lung cancer || id:ieu-a-966	h8Mp56	ieu-a-966	27209	rs7788008	-1.73852	1.41477	0.219134
671	Television watching (excluded education SNPs)	Lung cancer || id:ieu-a-966	h8Mp56	ieu-a-966	27209	rs7834121	-0.467538	1.327	0.724593
672	Television watching (excluded education SNPs)	Lung cancer || id:ieu-a-966	h8Mp56	ieu-a-966	27209	rs78394231	0.0018571	1.42167	0.998958
673	Television watching (excluded education SNPs)	Lung cancer || id:ieu-a-966	h8Mp56	ieu-a-966	27209	rs801733	-0.5923	1.11559	0.595467
674	Television watching (excluded education SNPs)	Lung cancer || id:ieu-a-966	h8Mp56	ieu-a-966	27209	rs8756	-1.00882	1.38938	0.467785
675	Television watching (excluded education SNPs)	Lung cancer || id:ieu-a-966	h8Mp56	ieu-a-966	27209	rs9471333	0.533835	1.38777	0.700481
676	Television watching (excluded education SNPs)	Lung cancer || id:ieu-a-966	h8Mp56	ieu-a-966	27209	rs9563168	-0.918806	1.23722	0.457702
677	Television watching (excluded education SNPs)	Lung cancer || id:ieu-a-966	h8Mp56	ieu-a-966	27209	rs9569734	0.746321	1.28405	0.56109
678	Television watching (excluded education SNPs)	Lung cancer || id:ieu-a-966	h8Mp56	ieu-a-966	27209	rs9834970	-1.70082	1.402	0.225076
679	Television watching (excluded education SNPs)	Lung cancer || id:ieu-a-966	h8Mp56	ieu-a-966	27209	rs984409	0.0879247	1.2414	0.943535
680	Television watching (excluded education SNPs)	Lung cancer || id:ieu-a-966	h8Mp56	ieu-a-966	27209	rs9867121	-0.759495	1.26932	0.549607
681	Television watching (excluded education SNPs)	Lung cancer || id:ieu-a-966	h8Mp56	ieu-a-966	27209	rs9902312	-1.17433	1.28067	0.359161
682	Television watching (excluded education SNPs)	Lung cancer || id:ieu-a-966	h8Mp56	ieu-a-966	27209	All - Inverse variance weighted	0.675397	0.157853	1.88039e-05
683	Television watching (excluded education SNPs)	Lung cancer || id:ieu-a-966	h8Mp56	ieu-a-966	27209	All - MR Egger	0.556766	0.744486	0.456638
684	Television watching (excluded education SNPs)	Squamous cell lung cancer || id:ieu-a-967	h8Mp56	ieu-a-967	18313	rs10041724	0.43576	1.89222	0.817866
685	Television watching (excluded education SNPs)	Squamous cell lung cancer || id:ieu-a-967	h8Mp56	ieu-a-967	18313	rs10054327	-0.400574	1.64929	0.808101
686	Television watching (excluded education SNPs)	Squamous cell lung cancer || id:ieu-a-967	h8Mp56	ieu-a-967	18313	rs10189857	1.28904	1.4201	0.364031
687	Television watching (excluded education SNPs)	Squamous cell lung cancer || id:ieu-a-967	h8Mp56	ieu-a-967	18313	rs1031423	-0.345182	1.88579	0.854764
688	Television watching (excluded education SNPs)	Squamous cell lung cancer || id:ieu-a-967	h8Mp56	ieu-a-967	18313	rs10771746	-0.830164	2.14621	0.698901
689	Television watching (excluded education SNPs)	Squamous cell lung cancer || id:ieu-a-967	h8Mp56	ieu-a-967	18313	rs10876864	1.44425	2.097	0.490999
690	Television watching (excluded education SNPs)	Squamous cell lung cancer || id:ieu-a-967	h8Mp56	ieu-a-967	18313	rs10932837	-2.18588	2.15138	0.309614
691	Television watching (excluded education SNPs)	Squamous cell lung cancer || id:ieu-a-967	h8Mp56	ieu-a-967	18313	rs10947452	-0.401196	2.07007	0.846326
692	Television watching (excluded education SNPs)	Squamous cell lung cancer || id:ieu-a-967	h8Mp56	ieu-a-967	18313	rs11130793	-0.824262	2.16785	0.703781
693	Television watching (excluded education SNPs)	Squamous cell lung cancer || id:ieu-a-967	h8Mp56	ieu-a-967	18313	rs111901094	1.52746	2.59341	0.555875
694	Television watching (excluded education SNPs)	Squamous cell lung cancer || id:ieu-a-967	h8Mp56	ieu-a-967	18313	rs11218575	4.51717	1.7704	0.0107261
695	Television watching (excluded education SNPs)	Squamous cell lung cancer || id:ieu-a-967	h8Mp56	ieu-a-967	18313	rs11245482	2.79128	2.24438	0.213621
696	Television watching (excluded education SNPs)	Squamous cell lung cancer || id:ieu-a-967	h8Mp56	ieu-a-967	18313	rs114720649	-1.2887	2.56321	0.615128
697	Television watching (excluded education SNPs)	Squamous cell lung cancer || id:ieu-a-967	h8Mp56	ieu-a-967	18313	rs11917871	-0.422479	1.694	0.803053
698	Television watching (excluded education SNPs)	Squamous cell lung cancer || id:ieu-a-967	h8Mp56	ieu-a-967	18313	rs12105701	2.93115	2.09592	0.161963
699	Television watching (excluded education SNPs)	Squamous cell lung cancer || id:ieu-a-967	h8Mp56	ieu-a-967	18313	rs12342024	-0.15702	1.97148	0.936519
700	Television watching (excluded education SNPs)	Squamous cell lung cancer || id:ieu-a-967	h8Mp56	ieu-a-967	18313	rs1243182	0.545011	1.53953	0.72333
701	Television watching (excluded education SNPs)	Squamous cell lung cancer || id:ieu-a-967	h8Mp56	ieu-a-967	18313	rs12491503	-3.25304	1.97843	0.100124
702	Television watching (excluded education SNPs)	Squamous cell lung cancer || id:ieu-a-967	h8Mp56	ieu-a-967	18313	rs13107325	0.484921	1.82679	0.790663
703	Television watching (excluded education SNPs)	Squamous cell lung cancer || id:ieu-a-967	h8Mp56	ieu-a-967	18313	rs1451533	0.295364	1.96325	0.880412
704	Television watching (excluded education SNPs)	Squamous cell lung cancer || id:ieu-a-967	h8Mp56	ieu-a-967	18313	rs148544378	-0.388611	2.51983	0.877435
705	Television watching (excluded education SNPs)	Squamous cell lung cancer || id:ieu-a-967	h8Mp56	ieu-a-967	18313	rs148648822	1.40075	2.30822	0.543949
706	Television watching (excluded education SNPs)	Squamous cell lung cancer || id:ieu-a-967	h8Mp56	ieu-a-967	18313	rs17207890	3.55827	1.73463	0.0402359
707	Television watching (excluded education SNPs)	Squamous cell lung cancer || id:ieu-a-967	h8Mp56	ieu-a-967	18313	rs17727474	2.71727	1.87994	0.148345
708	Television watching (excluded education SNPs)	Squamous cell lung cancer || id:ieu-a-967	h8Mp56	ieu-a-967	18313	rs17789218	0.685126	1.71842	0.690118
709	Television watching (excluded education SNPs)	Squamous cell lung cancer || id:ieu-a-967	h8Mp56	ieu-a-967	18313	rs182355396	1.13357	1.77392	0.52281
710	Television watching (excluded education SNPs)	Squamous cell lung cancer || id:ieu-a-967	h8Mp56	ieu-a-967	18313	rs2034768	0.8697	1.86073	0.640216
711	Television watching (excluded education SNPs)	Squamous cell lung cancer || id:ieu-a-967	h8Mp56	ieu-a-967	18313	rs2045147	2.67732	2.19285	0.222111
712	Television watching (excluded education SNPs)	Squamous cell lung cancer || id:ieu-a-967	h8Mp56	ieu-a-967	18313	rs2073869	-1.53646	1.83953	0.403579
713	Television watching (excluded education SNPs)	Squamous cell lung cancer || id:ieu-a-967	h8Mp56	ieu-a-967	18313	rs2173650	2.15071	2.16233	0.319919
714	Television watching (excluded education SNPs)	Squamous cell lung cancer || id:ieu-a-967	h8Mp56	ieu-a-967	18313	rs2184364	1.16135	2.02588	0.56647
715	Television watching (excluded education SNPs)	Squamous cell lung cancer || id:ieu-a-967	h8Mp56	ieu-a-967	18313	rs2291681	0.198641	2.12462	0.92551
716	Television watching (excluded education SNPs)	Squamous cell lung cancer || id:ieu-a-967	h8Mp56	ieu-a-967	18313	rs2447098	3.10583	1.7716	0.0795808
717	Television watching (excluded education SNPs)	Squamous cell lung cancer || id:ieu-a-967	h8Mp56	ieu-a-967	18313	rs2460	-1.11385	2.11107	0.597759
718	Television watching (excluded education SNPs)	Squamous cell lung cancer || id:ieu-a-967	h8Mp56	ieu-a-967	18313	rs2584597	0.222839	2.1024	0.915588
719	Television watching (excluded education SNPs)	Squamous cell lung cancer || id:ieu-a-967	h8Mp56	ieu-a-967	18313	rs263771	2.64791	2.05747	0.198103
720	Television watching (excluded education SNPs)	Squamous cell lung cancer || id:ieu-a-967	h8Mp56	ieu-a-967	18313	rs2971640	4.42081	2.22185	0.046624
721	Television watching (excluded education SNPs)	Squamous cell lung cancer || id:ieu-a-967	h8Mp56	ieu-a-967	18313	rs303753	3.77429	2.17714	0.0829898
722	Television watching (excluded education SNPs)	Squamous cell lung cancer || id:ieu-a-967	h8Mp56	ieu-a-967	18313	rs34811474	4.36325	2.64233	0.0986798
723	Television watching (excluded education SNPs)	Squamous cell lung cancer || id:ieu-a-967	h8Mp56	ieu-a-967	18313	rs34864022	1.1548	2.19073	0.598105
724	Television watching (excluded education SNPs)	Squamous cell lung cancer || id:ieu-a-967	h8Mp56	ieu-a-967	18313	rs374722	0.997138	1.61142	0.536051
725	Television watching (excluded education SNPs)	Squamous cell lung cancer || id:ieu-a-967	h8Mp56	ieu-a-967	18313	rs4382592	6.21371	2.28807	0.00661359
726	Television watching (excluded education SNPs)	Squamous cell lung cancer || id:ieu-a-967	h8Mp56	ieu-a-967	18313	rs4577309	5.22478	1.85769	0.00491556
727	Television watching (excluded education SNPs)	Squamous cell lung cancer || id:ieu-a-967	h8Mp56	ieu-a-967	18313	rs4845364	0.782307	1.8048	0.664681
728	Television watching (excluded education SNPs)	Squamous cell lung cancer || id:ieu-a-967	h8Mp56	ieu-a-967	18313	rs4973576	0.70316	2.02707	0.728677
729	Television watching (excluded education SNPs)	Squamous cell lung cancer || id:ieu-a-967	h8Mp56	ieu-a-967	18313	rs553397860	-2.02356	2.29824	0.378597
730	Television watching (excluded education SNPs)	Squamous cell lung cancer || id:ieu-a-967	h8Mp56	ieu-a-967	18313	rs56103247	1.48722	2.29503	0.516973
731	Television watching (excluded education SNPs)	Squamous cell lung cancer || id:ieu-a-967	h8Mp56	ieu-a-967	18313	rs56398417	-3.31651	2.30886	0.15088
732	Television watching (excluded education SNPs)	Squamous cell lung cancer || id:ieu-a-967	h8Mp56	ieu-a-967	18313	rs56858768	-0.957987	1.97093	0.626926
733	Television watching (excluded education SNPs)	Squamous cell lung cancer || id:ieu-a-967	h8Mp56	ieu-a-967	18313	rs57585211	0.497304	2.20071	0.821221
734	Television watching (excluded education SNPs)	Squamous cell lung cancer || id:ieu-a-967	h8Mp56	ieu-a-967	18313	rs6131281	-3.26134	1.82787	0.0743868
735	Television watching (excluded education SNPs)	Squamous cell lung cancer || id:ieu-a-967	h8Mp56	ieu-a-967	18313	rs6141814	0.836514	2.03443	0.680941
736	Television watching (excluded education SNPs)	Squamous cell lung cancer || id:ieu-a-967	h8Mp56	ieu-a-967	18313	rs62332760	-1.95956	1.97521	0.32116
737	Television watching (excluded education SNPs)	Squamous cell lung cancer || id:ieu-a-967	h8Mp56	ieu-a-967	18313	rs62379379	3.82018	2.20115	0.0826457
738	Television watching (excluded education SNPs)	Squamous cell lung cancer || id:ieu-a-967	h8Mp56	ieu-a-967	18313	rs62641636	2.73239	2.1535	0.204508
739	Television watching (excluded education SNPs)	Squamous cell lung cancer || id:ieu-a-967	h8Mp56	ieu-a-967	18313	rs6472942	1.13853	2.16015	0.598152
740	Television watching (excluded education SNPs)	Squamous cell lung cancer || id:ieu-a-967	h8Mp56	ieu-a-967	18313	rs648044	0.355598	2.21807	0.87263
741	Television watching (excluded education SNPs)	Squamous cell lung cancer || id:ieu-a-967	h8Mp56	ieu-a-967	18313	rs6673341	1.87945	1.77153	0.288728
742	Television watching (excluded education SNPs)	Squamous cell lung cancer || id:ieu-a-967	h8Mp56	ieu-a-967	18313	rs66852340	0.06585	1.83878	0.971432
743	Television watching (excluded education SNPs)	Squamous cell lung cancer || id:ieu-a-967	h8Mp56	ieu-a-967	18313	rs6721975	3.47095	1.96424	0.077216
744	Television watching (excluded education SNPs)	Squamous cell lung cancer || id:ieu-a-967	h8Mp56	ieu-a-967	18313	rs6797840	-1.34076	1.74919	0.443375
745	Television watching (excluded education SNPs)	Squamous cell lung cancer || id:ieu-a-967	h8Mp56	ieu-a-967	18313	rs6825241	-1.2237	1.56982	0.435677
746	Television watching (excluded education SNPs)	Squamous cell lung cancer || id:ieu-a-967	h8Mp56	ieu-a-967	18313	rs6850494	1.01046	2.065	0.624609
747	Television watching (excluded education SNPs)	Squamous cell lung cancer || id:ieu-a-967	h8Mp56	ieu-a-967	18313	rs7184800	-0.809753	1.78447	0.649989
748	Television watching (excluded education SNPs)	Squamous cell lung cancer || id:ieu-a-967	h8Mp56	ieu-a-967	18313	rs7248205	1.84121	2.16986	0.396138
749	Television watching (excluded education SNPs)	Squamous cell lung cancer || id:ieu-a-967	h8Mp56	ieu-a-967	18313	rs72725224	-2.55139	2.05196	0.213723
750	Television watching (excluded education SNPs)	Squamous cell lung cancer || id:ieu-a-967	h8Mp56	ieu-a-967	18313	rs72781699	-1.27522	1.79479	0.477386
751	Television watching (excluded education SNPs)	Squamous cell lung cancer || id:ieu-a-967	h8Mp56	ieu-a-967	18313	rs72828890	-1.22171	2.549	0.631732
752	Television watching (excluded education SNPs)	Squamous cell lung cancer || id:ieu-a-967	h8Mp56	ieu-a-967	18313	rs72834698	3.07057	1.66291	0.0648196
753	Television watching (excluded education SNPs)	Squamous cell lung cancer || id:ieu-a-967	h8Mp56	ieu-a-967	18313	rs74802478	4.01502	2.06918	0.0523318
754	Television watching (excluded education SNPs)	Squamous cell lung cancer || id:ieu-a-967	h8Mp56	ieu-a-967	18313	rs749671	3.96077	1.67394	0.0179747
755	Television watching (excluded education SNPs)	Squamous cell lung cancer || id:ieu-a-967	h8Mp56	ieu-a-967	18313	rs7564130	3.01957	1.94493	0.120535
756	Television watching (excluded education SNPs)	Squamous cell lung cancer || id:ieu-a-967	h8Mp56	ieu-a-967	18313	rs7693703	-2.1129	2.076	0.308784
757	Television watching (excluded education SNPs)	Squamous cell lung cancer || id:ieu-a-967	h8Mp56	ieu-a-967	18313	rs7716447	3.9369	3.05069	0.196879
758	Television watching (excluded education SNPs)	Squamous cell lung cancer || id:ieu-a-967	h8Mp56	ieu-a-967	18313	rs7788008	-1.69089	2.17146	0.436163
759	Television watching (excluded education SNPs)	Squamous cell lung cancer || id:ieu-a-967	h8Mp56	ieu-a-967	18313	rs7834121	-2.6443	2.09586	0.207064
760	Television watching (excluded education SNPs)	Squamous cell lung cancer || id:ieu-a-967	h8Mp56	ieu-a-967	18313	rs78394231	1.28614	2.20671	0.560007
761	Television watching (excluded education SNPs)	Squamous cell lung cancer || id:ieu-a-967	h8Mp56	ieu-a-967	18313	rs801733	0.732306	1.66853	0.660739
762	Television watching (excluded education SNPs)	Squamous cell lung cancer || id:ieu-a-967	h8Mp56	ieu-a-967	18313	rs8756	-0.653982	2.11608	0.757281
763	Television watching (excluded education SNPs)	Squamous cell lung cancer || id:ieu-a-967	h8Mp56	ieu-a-967	18313	rs9471333	0.358931	2.11531	0.86526
764	Television watching (excluded education SNPs)	Squamous cell lung cancer || id:ieu-a-967	h8Mp56	ieu-a-967	18313	rs9563168	-2.37021	1.94444	0.222857
765	Television watching (excluded education SNPs)	Squamous cell lung cancer || id:ieu-a-967	h8Mp56	ieu-a-967	18313	rs9569734	-2.07417	2.05447	0.312694
766	Television watching (excluded education SNPs)	Squamous cell lung cancer || id:ieu-a-967	h8Mp56	ieu-a-967	18313	rs9834970	-0.490204	2.10485	0.815845
767	Television watching (excluded education SNPs)	Squamous cell lung cancer || id:ieu-a-967	h8Mp56	ieu-a-967	18313	rs984409	-0.838967	1.92193	0.662458
768	Television watching (excluded education SNPs)	Squamous cell lung cancer || id:ieu-a-967	h8Mp56	ieu-a-967	18313	rs9867121	-0.895084	1.95837	0.647631
769	Television watching (excluded education SNPs)	Squamous cell lung cancer || id:ieu-a-967	h8Mp56	ieu-a-967	18313	rs9902312	-2.30554	1.99127	0.246935
770	Television watching (excluded education SNPs)	Squamous cell lung cancer || id:ieu-a-967	h8Mp56	ieu-a-967	18313	All - Inverse variance weighted	0.644507	0.226826	0.00449133
771	Television watching (excluded education SNPs)	Squamous cell lung cancer || id:ieu-a-967	h8Mp56	ieu-a-967	18313	All - MR Egger	0.161581	1.06473	0.879742
772	Television watching (MVMR adjusted for BMI)	Lung adenocarcinoma || id:ieu-a-965	dPzbCf	ieu-a-965	18336	rs10041724	4.37085	1.77656	0.0138823
773	Television watching (MVMR adjusted for BMI)	Lung adenocarcinoma || id:ieu-a-965	dPzbCf	ieu-a-965	18336	rs10054327	-0.440873	1.65859	0.790384
774	Television watching (MVMR adjusted for BMI)	Lung adenocarcinoma || id:ieu-a-965	dPzbCf	ieu-a-965	18336	rs1031423	-0.601811	1.83268	0.742627
775	Television watching (MVMR adjusted for BMI)	Lung adenocarcinoma || id:ieu-a-965	dPzbCf	ieu-a-965	18336	rs10771746	6.1526	2.35957	0.00912041
776	Television watching (MVMR adjusted for BMI)	Lung adenocarcinoma || id:ieu-a-965	dPzbCf	ieu-a-965	18336	rs10772643	-2.33013	1.66676	0.162114
777	Television watching (MVMR adjusted for BMI)	Lung adenocarcinoma || id:ieu-a-965	dPzbCf	ieu-a-965	18336	rs10932837	0.576152	2.077	0.781476
778	Television watching (MVMR adjusted for BMI)	Lung adenocarcinoma || id:ieu-a-965	dPzbCf	ieu-a-965	18336	rs10947452	-1.41449	2.03407	0.486807
779	Television watching (MVMR adjusted for BMI)	Lung adenocarcinoma || id:ieu-a-965	dPzbCf	ieu-a-965	18336	rs11130793	1.59504	2.11092	0.449882
780	Television watching (MVMR adjusted for BMI)	Lung adenocarcinoma || id:ieu-a-965	dPzbCf	ieu-a-965	18336	rs11218575	0.777587	1.85453	0.675004
781	Television watching (MVMR adjusted for BMI)	Lung adenocarcinoma || id:ieu-a-965	dPzbCf	ieu-a-965	18336	rs11245482	1.52698	2.21677	0.49093
782	Television watching (MVMR adjusted for BMI)	Lung adenocarcinoma || id:ieu-a-965	dPzbCf	ieu-a-965	18336	rs114720649	-0.531256	2.5745	0.836515
783	Television watching (MVMR adjusted for BMI)	Lung adenocarcinoma || id:ieu-a-965	dPzbCf	ieu-a-965	18336	rs11689199	2.96085	1.49361	0.0474408
784	Television watching (MVMR adjusted for BMI)	Lung adenocarcinoma || id:ieu-a-965	dPzbCf	ieu-a-965	18336	rs11714337	-0.397037	2.00379	0.842933
785	Television watching (MVMR adjusted for BMI)	Lung adenocarcinoma || id:ieu-a-965	dPzbCf	ieu-a-965	18336	rs11917871	0.298639	1.66147	0.857354
786	Television watching (MVMR adjusted for BMI)	Lung adenocarcinoma || id:ieu-a-965	dPzbCf	ieu-a-965	18336	rs12105701	1.84015	2.10415	0.38183
787	Television watching (MVMR adjusted for BMI)	Lung adenocarcinoma || id:ieu-a-965	dPzbCf	ieu-a-965	18336	rs12342024	0.907348	2.0911	0.664354
788	Television watching (MVMR adjusted for BMI)	Lung adenocarcinoma || id:ieu-a-965	dPzbCf	ieu-a-965	18336	rs12491503	1.22473	2.08879	0.55765
789	Television watching (MVMR adjusted for BMI)	Lung adenocarcinoma || id:ieu-a-965	dPzbCf	ieu-a-965	18336	rs12554512	-0.467837	1.40514	0.739175
790	Television watching (MVMR adjusted for BMI)	Lung adenocarcinoma || id:ieu-a-965	dPzbCf	ieu-a-965	18336	rs13107325	0.827914	1.76845	0.639671
791	Television watching (MVMR adjusted for BMI)	Lung adenocarcinoma || id:ieu-a-965	dPzbCf	ieu-a-965	18336	rs1451533	0.555834	2.00294	0.781389
792	Television watching (MVMR adjusted for BMI)	Lung adenocarcinoma || id:ieu-a-965	dPzbCf	ieu-a-965	18336	rs148544378	0.45383	2.37215	0.848278
793	Television watching (MVMR adjusted for BMI)	Lung adenocarcinoma || id:ieu-a-965	dPzbCf	ieu-a-965	18336	rs148648822	-3.11711	2.15389	0.147841
794	Television watching (MVMR adjusted for BMI)	Lung adenocarcinoma || id:ieu-a-965	dPzbCf	ieu-a-965	18336	rs17207890	4.82822	1.684	0.00414235
795	Television watching (MVMR adjusted for BMI)	Lung adenocarcinoma || id:ieu-a-965	dPzbCf	ieu-a-965	18336	rs17727474	3.0521	1.8745	0.103478
796	Television watching (MVMR adjusted for BMI)	Lung adenocarcinoma || id:ieu-a-965	dPzbCf	ieu-a-965	18336	rs182355396	2.74409	1.9552	0.160473
797	Television watching (MVMR adjusted for BMI)	Lung adenocarcinoma || id:ieu-a-965	dPzbCf	ieu-a-965	18336	rs1913808	-0.00966593	1.97173	0.996089
798	Television watching (MVMR adjusted for BMI)	Lung adenocarcinoma || id:ieu-a-965	dPzbCf	ieu-a-965	18336	rs2034768	1.07889	1.87	0.563977
799	Television watching (MVMR adjusted for BMI)	Lung adenocarcinoma || id:ieu-a-965	dPzbCf	ieu-a-965	18336	rs2073869	-1.39898	1.88195	0.457259
800	Television watching (MVMR adjusted for BMI)	Lung adenocarcinoma || id:ieu-a-965	dPzbCf	ieu-a-965	18336	rs2173650	0.665528	2.17617	0.759737
801	Television watching (MVMR adjusted for BMI)	Lung adenocarcinoma || id:ieu-a-965	dPzbCf	ieu-a-965	18336	rs2184364	3.81384	1.972	0.0531134
802	Television watching (MVMR adjusted for BMI)	Lung adenocarcinoma || id:ieu-a-965	dPzbCf	ieu-a-965	18336	rs2291681	-0.258182	2.13569	0.903779
803	Television watching (MVMR adjusted for BMI)	Lung adenocarcinoma || id:ieu-a-965	dPzbCf	ieu-a-965	18336	rs2460	-3.59494	2.03633	0.0774968
804	Television watching (MVMR adjusted for BMI)	Lung adenocarcinoma || id:ieu-a-965	dPzbCf	ieu-a-965	18336	rs2616830	0.918963	1.73356	0.596042
805	Television watching (MVMR adjusted for BMI)	Lung adenocarcinoma || id:ieu-a-965	dPzbCf	ieu-a-965	18336	rs262890	1.41548	1.63895	0.38778
806	Television watching (MVMR adjusted for BMI)	Lung adenocarcinoma || id:ieu-a-965	dPzbCf	ieu-a-965	18336	rs2971640	2.81902	2.17323	0.194578
807	Television watching (MVMR adjusted for BMI)	Lung adenocarcinoma || id:ieu-a-965	dPzbCf	ieu-a-965	18336	rs303753	0.282014	2.07507	0.891896
808	Television watching (MVMR adjusted for BMI)	Lung adenocarcinoma || id:ieu-a-965	dPzbCf	ieu-a-965	18336	rs34811474	-0.881347	2.86913	0.758705
809	Television watching (MVMR adjusted for BMI)	Lung adenocarcinoma || id:ieu-a-965	dPzbCf	ieu-a-965	18336	rs34864022	-0.340425	2.14846	0.874102
810	Television watching (MVMR adjusted for BMI)	Lung adenocarcinoma || id:ieu-a-965	dPzbCf	ieu-a-965	18336	rs374722	0.450842	1.58796	0.776477
811	Television watching (MVMR adjusted for BMI)	Lung adenocarcinoma || id:ieu-a-965	dPzbCf	ieu-a-965	18336	rs3754970	-3.39918	1.93513	0.0789926
812	Television watching (MVMR adjusted for BMI)	Lung adenocarcinoma || id:ieu-a-965	dPzbCf	ieu-a-965	18336	rs3796386	1.39549	1.1035	0.206014
813	Television watching (MVMR adjusted for BMI)	Lung adenocarcinoma || id:ieu-a-965	dPzbCf	ieu-a-965	18336	rs4382592	2.40354	2.16943	0.2679
814	Television watching (MVMR adjusted for BMI)	Lung adenocarcinoma || id:ieu-a-965	dPzbCf	ieu-a-965	18336	rs4577309	2.79631	1.78869	0.117975
815	Television watching (MVMR adjusted for BMI)	Lung adenocarcinoma || id:ieu-a-965	dPzbCf	ieu-a-965	18336	rs4845364	1.41961	1.79	0.427733
816	Television watching (MVMR adjusted for BMI)	Lung adenocarcinoma || id:ieu-a-965	dPzbCf	ieu-a-965	18336	rs4973576	0.123181	2.0482	0.952043
817	Television watching (MVMR adjusted for BMI)	Lung adenocarcinoma || id:ieu-a-965	dPzbCf	ieu-a-965	18336	rs553397860	-0.699006	2.25782	0.756871
818	Television watching (MVMR adjusted for BMI)	Lung adenocarcinoma || id:ieu-a-965	dPzbCf	ieu-a-965	18336	rs56103247	3.04694	2.1787	0.161959
819	Television watching (MVMR adjusted for BMI)	Lung adenocarcinoma || id:ieu-a-965	dPzbCf	ieu-a-965	18336	rs56398417	-1.45529	2.24986	0.517739
820	Television watching (MVMR adjusted for BMI)	Lung adenocarcinoma || id:ieu-a-965	dPzbCf	ieu-a-965	18336	rs56858768	0.380578	2.03113	0.851369
821	Television watching (MVMR adjusted for BMI)	Lung adenocarcinoma || id:ieu-a-965	dPzbCf	ieu-a-965	18336	rs57585211	2.55336	2.23588	0.253458
822	Television watching (MVMR adjusted for BMI)	Lung adenocarcinoma || id:ieu-a-965	dPzbCf	ieu-a-965	18336	rs6131281	-1.71044	1.78506	0.337963
823	Television watching (MVMR adjusted for BMI)	Lung adenocarcinoma || id:ieu-a-965	dPzbCf	ieu-a-965	18336	rs62379379	3.22395	2.26942	0.155433
824	Television watching (MVMR adjusted for BMI)	Lung adenocarcinoma || id:ieu-a-965	dPzbCf	ieu-a-965	18336	rs62641636	1.90804	2.18329	0.382155
825	Television watching (MVMR adjusted for BMI)	Lung adenocarcinoma || id:ieu-a-965	dPzbCf	ieu-a-965	18336	rs6472942	-0.815462	2.09685	0.697351
826	Television watching (MVMR adjusted for BMI)	Lung adenocarcinoma || id:ieu-a-965	dPzbCf	ieu-a-965	18336	rs66852340	1.61469	1.89389	0.393891
827	Television watching (MVMR adjusted for BMI)	Lung adenocarcinoma || id:ieu-a-965	dPzbCf	ieu-a-965	18336	rs6721975	0.6601	2.05512	0.74806
828	Television watching (MVMR adjusted for BMI)	Lung adenocarcinoma || id:ieu-a-965	dPzbCf	ieu-a-965	18336	rs6797840	0.147173	1.70719	0.931301
829	Television watching (MVMR adjusted for BMI)	Lung adenocarcinoma || id:ieu-a-965	dPzbCf	ieu-a-965	18336	rs6825241	1.09654	1.63706	0.50297
830	Television watching (MVMR adjusted for BMI)	Lung adenocarcinoma || id:ieu-a-965	dPzbCf	ieu-a-965	18336	rs6850494	2.95893	2.11943	0.162685
831	Television watching (MVMR adjusted for BMI)	Lung adenocarcinoma || id:ieu-a-965	dPzbCf	ieu-a-965	18336	rs6905544	-2.13116	1.54537	0.167876
832	Television watching (MVMR adjusted for BMI)	Lung adenocarcinoma || id:ieu-a-965	dPzbCf	ieu-a-965	18336	rs7184800	-0.563586	1.76335	0.749264
833	Television watching (MVMR adjusted for BMI)	Lung adenocarcinoma || id:ieu-a-965	dPzbCf	ieu-a-965	18336	rs7189927	1.59595	1.99253	0.423153
834	Television watching (MVMR adjusted for BMI)	Lung adenocarcinoma || id:ieu-a-965	dPzbCf	ieu-a-965	18336	rs72725224	-1.6226	2.02443	0.422838
835	Television watching (MVMR adjusted for BMI)	Lung adenocarcinoma || id:ieu-a-965	dPzbCf	ieu-a-965	18336	rs72781699	0.651163	1.82626	0.721425
836	Television watching (MVMR adjusted for BMI)	Lung adenocarcinoma || id:ieu-a-965	dPzbCf	ieu-a-965	18336	rs72828890	0.762068	2.47426	0.758084
837	Television watching (MVMR adjusted for BMI)	Lung adenocarcinoma || id:ieu-a-965	dPzbCf	ieu-a-965	18336	rs72834698	1.4736	1.72839	0.393888
838	Television watching (MVMR adjusted for BMI)	Lung adenocarcinoma || id:ieu-a-965	dPzbCf	ieu-a-965	18336	rs74802478	2.15365	2.10224	0.305619
839	Television watching (MVMR adjusted for BMI)	Lung adenocarcinoma || id:ieu-a-965	dPzbCf	ieu-a-965	18336	rs7564130	0.581721	1.8874	0.75792
840	Television watching (MVMR adjusted for BMI)	Lung adenocarcinoma || id:ieu-a-965	dPzbCf	ieu-a-965	18336	rs7693703	-2.92737	2.1007	0.163461
841	Television watching (MVMR adjusted for BMI)	Lung adenocarcinoma || id:ieu-a-965	dPzbCf	ieu-a-965	18336	rs7716447	-1.07837	2.833	0.703466
842	Television watching (MVMR adjusted for BMI)	Lung adenocarcinoma || id:ieu-a-965	dPzbCf	ieu-a-965	18336	rs7788008	-2.86691	2.20146	0.192822
843	Television watching (MVMR adjusted for BMI)	Lung adenocarcinoma || id:ieu-a-965	dPzbCf	ieu-a-965	18336	rs7834121	2.67044	1.94657	0.170104
844	Television watching (MVMR adjusted for BMI)	Lung adenocarcinoma || id:ieu-a-965	dPzbCf	ieu-a-965	18336	rs9471333	0.551785	2.125	0.795123
845	Television watching (MVMR adjusted for BMI)	Lung adenocarcinoma || id:ieu-a-965	dPzbCf	ieu-a-965	18336	rs9563168	-2.24097	1.91928	0.242964
846	Television watching (MVMR adjusted for BMI)	Lung adenocarcinoma || id:ieu-a-965	dPzbCf	ieu-a-965	18336	rs9569734	1.33306	1.95153	0.494553
847	Television watching (MVMR adjusted for BMI)	Lung adenocarcinoma || id:ieu-a-965	dPzbCf	ieu-a-965	18336	rs9867121	-1.15966	1.938	0.549587
848	Television watching (MVMR adjusted for BMI)	Lung adenocarcinoma || id:ieu-a-965	dPzbCf	ieu-a-965	18336	rs9902312	-1.14465	1.9452	0.55623
849	Television watching (MVMR adjusted for BMI)	Lung adenocarcinoma || id:ieu-a-965	dPzbCf	ieu-a-965	18336	rs9964724	0.0379315	1.623	0.981354
850	Television watching (MVMR adjusted for BMI)	Lung adenocarcinoma || id:ieu-a-965	dPzbCf	ieu-a-965	18336	All - Inverse variance weighted	0.590519	0.21694	0.00648814
851	Television watching (MVMR adjusted for BMI)	Lung adenocarcinoma || id:ieu-a-965	dPzbCf	ieu-a-965	18336	All - MR Egger	0.512458	0.955978	0.593485
852	Television watching (MVMR adjusted for BMI)	Lung cancer || id:ieu-a-966	dPzbCf	ieu-a-966	27209	rs10041724	1.70008	1.21389	0.161356
853	Television watching (MVMR adjusted for BMI)	Lung cancer || id:ieu-a-966	dPzbCf	ieu-a-966	27209	rs10054327	0.0523174	1.07159	0.961061
854	Television watching (MVMR adjusted for BMI)	Lung cancer || id:ieu-a-966	dPzbCf	ieu-a-966	27209	rs1031423	-1.33718	1.23205	0.277775
855	Television watching (MVMR adjusted for BMI)	Lung cancer || id:ieu-a-966	dPzbCf	ieu-a-966	27209	rs10771746	2.73861	1.46907	0.062297
856	Television watching (MVMR adjusted for BMI)	Lung cancer || id:ieu-a-966	dPzbCf	ieu-a-966	27209	rs10772643	0.43202	1.13712	0.704001
857	Television watching (MVMR adjusted for BMI)	Lung cancer || id:ieu-a-966	dPzbCf	ieu-a-966	27209	rs10932837	0.0812738	1.36738	0.952604
858	Television watching (MVMR adjusted for BMI)	Lung cancer || id:ieu-a-966	dPzbCf	ieu-a-966	27209	rs10947452	0.0514101	1.36171	0.969884
859	Television watching (MVMR adjusted for BMI)	Lung cancer || id:ieu-a-966	dPzbCf	ieu-a-966	27209	rs11130793	-0.0159983	1.40238	0.990898
860	Television watching (MVMR adjusted for BMI)	Lung cancer || id:ieu-a-966	dPzbCf	ieu-a-966	27209	rs11218575	1.73135	1.1934	0.146843
861	Television watching (MVMR adjusted for BMI)	Lung cancer || id:ieu-a-966	dPzbCf	ieu-a-966	27209	rs11245482	1.37684	1.44338	0.340136
862	Television watching (MVMR adjusted for BMI)	Lung cancer || id:ieu-a-966	dPzbCf	ieu-a-966	27209	rs114720649	-1.34159	1.66643	0.420779
863	Television watching (MVMR adjusted for BMI)	Lung cancer || id:ieu-a-966	dPzbCf	ieu-a-966	27209	rs11689199	-0.00794389	1.02072	0.99379
864	Television watching (MVMR adjusted for BMI)	Lung cancer || id:ieu-a-966	dPzbCf	ieu-a-966	27209	rs11714337	-0.105422	1.29571	0.935154
865	Television watching (MVMR adjusted for BMI)	Lung cancer || id:ieu-a-966	dPzbCf	ieu-a-966	27209	rs11917871	-0.294848	1.09882	0.788445
866	Television watching (MVMR adjusted for BMI)	Lung cancer || id:ieu-a-966	dPzbCf	ieu-a-966	27209	rs12105701	2.90685	1.36623	0.0333665
867	Television watching (MVMR adjusted for BMI)	Lung cancer || id:ieu-a-966	dPzbCf	ieu-a-966	27209	rs12342024	0.541338	1.33681	0.685516
868	Television watching (MVMR adjusted for BMI)	Lung cancer || id:ieu-a-966	dPzbCf	ieu-a-966	27209	rs12491503	1.22494	1.36457	0.369361
869	Television watching (MVMR adjusted for BMI)	Lung cancer || id:ieu-a-966	dPzbCf	ieu-a-966	27209	rs12554512	0.344769	0.897667	0.700925
870	Television watching (MVMR adjusted for BMI)	Lung cancer || id:ieu-a-966	dPzbCf	ieu-a-966	27209	rs13107325	1.59778	1.22497	0.192115
871	Television watching (MVMR adjusted for BMI)	Lung cancer || id:ieu-a-966	dPzbCf	ieu-a-966	27209	rs1451533	1.30203	1.30412	0.318088
872	Television watching (MVMR adjusted for BMI)	Lung cancer || id:ieu-a-966	dPzbCf	ieu-a-966	27209	rs148544378	1.19908	1.51749	0.429426
873	Television watching (MVMR adjusted for BMI)	Lung cancer || id:ieu-a-966	dPzbCf	ieu-a-966	27209	rs148648822	-0.43716	1.45928	0.764503
874	Television watching (MVMR adjusted for BMI)	Lung cancer || id:ieu-a-966	dPzbCf	ieu-a-966	27209	rs17207890	3.13594	1.13456	0.00570965
875	Television watching (MVMR adjusted for BMI)	Lung cancer || id:ieu-a-966	dPzbCf	ieu-a-966	27209	rs17727474	1.80897	1.25211	0.148533
876	Television watching (MVMR adjusted for BMI)	Lung cancer || id:ieu-a-966	dPzbCf	ieu-a-966	27209	rs182355396	1.54564	1.1908	0.194293
877	Television watching (MVMR adjusted for BMI)	Lung cancer || id:ieu-a-966	dPzbCf	ieu-a-966	27209	rs1913808	-0.585224	1.29473	0.651266
878	Television watching (MVMR adjusted for BMI)	Lung cancer || id:ieu-a-966	dPzbCf	ieu-a-966	27209	rs2034768	0.275364	1.2036	0.819037
879	Television watching (MVMR adjusted for BMI)	Lung cancer || id:ieu-a-966	dPzbCf	ieu-a-966	27209	rs2073869	0.182315	1.18611	0.877839
880	Television watching (MVMR adjusted for BMI)	Lung cancer || id:ieu-a-966	dPzbCf	ieu-a-966	27209	rs2173650	1.64454	1.4135	0.244645
881	Television watching (MVMR adjusted for BMI)	Lung cancer || id:ieu-a-966	dPzbCf	ieu-a-966	27209	rs2184364	0.666412	1.33794	0.618421
882	Television watching (MVMR adjusted for BMI)	Lung cancer || id:ieu-a-966	dPzbCf	ieu-a-966	27209	rs2291681	0.370429	1.383	0.788819
883	Television watching (MVMR adjusted for BMI)	Lung cancer || id:ieu-a-966	dPzbCf	ieu-a-966	27209	rs2460	-3.42643	1.3272	0.00983148
884	Television watching (MVMR adjusted for BMI)	Lung cancer || id:ieu-a-966	dPzbCf	ieu-a-966	27209	rs2616830	0.211517	1.11981	0.850182
885	Television watching (MVMR adjusted for BMI)	Lung cancer || id:ieu-a-966	dPzbCf	ieu-a-966	27209	rs262890	2.03286	1.06668	0.056679
886	Television watching (MVMR adjusted for BMI)	Lung cancer || id:ieu-a-966	dPzbCf	ieu-a-966	27209	rs2971640	2.88721	1.417	0.041595
887	Television watching (MVMR adjusted for BMI)	Lung cancer || id:ieu-a-966	dPzbCf	ieu-a-966	27209	rs303753	2.17525	1.388	0.117072
888	Television watching (MVMR adjusted for BMI)	Lung cancer || id:ieu-a-966	dPzbCf	ieu-a-966	27209	rs34811474	2.82954	1.7652	0.108944
889	Television watching (MVMR adjusted for BMI)	Lung cancer || id:ieu-a-966	dPzbCf	ieu-a-966	27209	rs34864022	0.0965712	1.41727	0.945675
890	Television watching (MVMR adjusted for BMI)	Lung cancer || id:ieu-a-966	dPzbCf	ieu-a-966	27209	rs374722	0.273558	1.03846	0.792221
891	Television watching (MVMR adjusted for BMI)	Lung cancer || id:ieu-a-966	dPzbCf	ieu-a-966	27209	rs3754970	-0.646125	1.2034	0.591325
892	Television watching (MVMR adjusted for BMI)	Lung cancer || id:ieu-a-966	dPzbCf	ieu-a-966	27209	rs3796386	1.00453	0.712846	0.158779
893	Television watching (MVMR adjusted for BMI)	Lung cancer || id:ieu-a-966	dPzbCf	ieu-a-966	27209	rs4382592	3.22501	1.44179	0.0252981
894	Television watching (MVMR adjusted for BMI)	Lung cancer || id:ieu-a-966	dPzbCf	ieu-a-966	27209	rs4577309	3.63532	1.18175	0.00209646
895	Television watching (MVMR adjusted for BMI)	Lung cancer || id:ieu-a-966	dPzbCf	ieu-a-966	27209	rs4845364	1.06974	1.1728	0.361703
896	Television watching (MVMR adjusted for BMI)	Lung cancer || id:ieu-a-966	dPzbCf	ieu-a-966	27209	rs4973576	-1.02186	1.3478	0.44835
897	Television watching (MVMR adjusted for BMI)	Lung cancer || id:ieu-a-966	dPzbCf	ieu-a-966	27209	rs553397860	-0.233243	1.46006	0.873079
898	Television watching (MVMR adjusted for BMI)	Lung cancer || id:ieu-a-966	dPzbCf	ieu-a-966	27209	rs56103247	1.4441	1.50003	0.335692
899	Television watching (MVMR adjusted for BMI)	Lung cancer || id:ieu-a-966	dPzbCf	ieu-a-966	27209	rs56398417	-1.80459	1.4675	0.218809
900	Television watching (MVMR adjusted for BMI)	Lung cancer || id:ieu-a-966	dPzbCf	ieu-a-966	27209	rs56858768	0.794647	1.32833	0.549688
901	Television watching (MVMR adjusted for BMI)	Lung cancer || id:ieu-a-966	dPzbCf	ieu-a-966	27209	rs57585211	0.969206	1.43994	0.500892
902	Television watching (MVMR adjusted for BMI)	Lung cancer || id:ieu-a-966	dPzbCf	ieu-a-966	27209	rs6131281	-2.15921	1.16781	0.0644676
903	Television watching (MVMR adjusted for BMI)	Lung cancer || id:ieu-a-966	dPzbCf	ieu-a-966	27209	rs62379379	3.51731	1.45319	0.0155034
904	Television watching (MVMR adjusted for BMI)	Lung cancer || id:ieu-a-966	dPzbCf	ieu-a-966	27209	rs62641636	2.06867	1.42136	0.145553
905	Television watching (MVMR adjusted for BMI)	Lung cancer || id:ieu-a-966	dPzbCf	ieu-a-966	27209	rs6472942	0.324238	1.39769	0.816553
906	Television watching (MVMR adjusted for BMI)	Lung cancer || id:ieu-a-966	dPzbCf	ieu-a-966	27209	rs66852340	-0.0188365	1.20228	0.9875
907	Television watching (MVMR adjusted for BMI)	Lung cancer || id:ieu-a-966	dPzbCf	ieu-a-966	27209	rs6721975	1.14957	1.32076	0.384091
908	Television watching (MVMR adjusted for BMI)	Lung cancer || id:ieu-a-966	dPzbCf	ieu-a-966	27209	rs6797840	-0.253983	1.11938	0.820504
909	Television watching (MVMR adjusted for BMI)	Lung cancer || id:ieu-a-966	dPzbCf	ieu-a-966	27209	rs6825241	0.933494	1.06824	0.382191
910	Television watching (MVMR adjusted for BMI)	Lung cancer || id:ieu-a-966	dPzbCf	ieu-a-966	27209	rs6850494	1.9623	1.35979	0.148994
911	Television watching (MVMR adjusted for BMI)	Lung cancer || id:ieu-a-966	dPzbCf	ieu-a-966	27209	rs6905544	-1.41445	0.999316	0.156945
912	Television watching (MVMR adjusted for BMI)	Lung cancer || id:ieu-a-966	dPzbCf	ieu-a-966	27209	rs7184800	-0.400457	1.15712	0.729281
913	Television watching (MVMR adjusted for BMI)	Lung cancer || id:ieu-a-966	dPzbCf	ieu-a-966	27209	rs7189927	2.85767	1.31513	0.0297871
914	Television watching (MVMR adjusted for BMI)	Lung cancer || id:ieu-a-966	dPzbCf	ieu-a-966	27209	rs72725224	-2.15632	1.39187	0.121328
915	Television watching (MVMR adjusted for BMI)	Lung cancer || id:ieu-a-966	dPzbCf	ieu-a-966	27209	rs72781699	0.409874	1.19863	0.732388
916	Television watching (MVMR adjusted for BMI)	Lung cancer || id:ieu-a-966	dPzbCf	ieu-a-966	27209	rs72828890	0.858916	1.59521	0.590277
917	Television watching (MVMR adjusted for BMI)	Lung cancer || id:ieu-a-966	dPzbCf	ieu-a-966	27209	rs72834698	2.33095	1.10548	0.0349841
918	Television watching (MVMR adjusted for BMI)	Lung cancer || id:ieu-a-966	dPzbCf	ieu-a-966	27209	rs74802478	2.12925	1.37624	0.121825
919	Television watching (MVMR adjusted for BMI)	Lung cancer || id:ieu-a-966	dPzbCf	ieu-a-966	27209	rs7564130	1.79054	1.2462	0.150775
920	Television watching (MVMR adjusted for BMI)	Lung cancer || id:ieu-a-966	dPzbCf	ieu-a-966	27209	rs7693703	-1.32318	1.33626	0.32207
921	Television watching (MVMR adjusted for BMI)	Lung cancer || id:ieu-a-966	dPzbCf	ieu-a-966	27209	rs7716447	3.1658	1.95523	0.105416
922	Television watching (MVMR adjusted for BMI)	Lung cancer || id:ieu-a-966	dPzbCf	ieu-a-966	27209	rs7788008	-1.73852	1.41477	0.219134
923	Television watching (MVMR adjusted for BMI)	Lung cancer || id:ieu-a-966	dPzbCf	ieu-a-966	27209	rs7834121	-0.467538	1.327	0.724593
924	Television watching (MVMR adjusted for BMI)	Lung cancer || id:ieu-a-966	dPzbCf	ieu-a-966	27209	rs9471333	0.533835	1.38777	0.700481
925	Television watching (MVMR adjusted for BMI)	Lung cancer || id:ieu-a-966	dPzbCf	ieu-a-966	27209	rs9563168	-0.918806	1.23722	0.457702
926	Television watching (MVMR adjusted for BMI)	Lung cancer || id:ieu-a-966	dPzbCf	ieu-a-966	27209	rs9569734	0.746321	1.28405	0.56109
927	Television watching (MVMR adjusted for BMI)	Lung cancer || id:ieu-a-966	dPzbCf	ieu-a-966	27209	rs9867121	-0.759495	1.26932	0.549607
928	Television watching (MVMR adjusted for BMI)	Lung cancer || id:ieu-a-966	dPzbCf	ieu-a-966	27209	rs9902312	-1.17433	1.28067	0.359161
929	Television watching (MVMR adjusted for BMI)	Lung cancer || id:ieu-a-966	dPzbCf	ieu-a-966	27209	rs9964724	1.29029	1.08572	0.23467
930	Television watching (MVMR adjusted for BMI)	Lung cancer || id:ieu-a-966	dPzbCf	ieu-a-966	27209	All - Inverse variance weighted	0.618971	0.159732	0.000106599
931	Television watching (MVMR adjusted for BMI)	Lung cancer || id:ieu-a-966	dPzbCf	ieu-a-966	27209	All - MR Egger	0.561305	0.704262	0.427927
932	Television watching (MVMR adjusted for BMI)	Squamous cell lung cancer || id:ieu-a-967	dPzbCf	ieu-a-967	18313	rs10041724	0.43576	1.89222	0.817866
933	Television watching (MVMR adjusted for BMI)	Squamous cell lung cancer || id:ieu-a-967	dPzbCf	ieu-a-967	18313	rs10054327	-0.400574	1.64929	0.808101
934	Television watching (MVMR adjusted for BMI)	Squamous cell lung cancer || id:ieu-a-967	dPzbCf	ieu-a-967	18313	rs1031423	-0.345182	1.88579	0.854764
935	Television watching (MVMR adjusted for BMI)	Squamous cell lung cancer || id:ieu-a-967	dPzbCf	ieu-a-967	18313	rs10771746	-0.830164	2.14621	0.698901
936	Television watching (MVMR adjusted for BMI)	Squamous cell lung cancer || id:ieu-a-967	dPzbCf	ieu-a-967	18313	rs10772643	1.41936	1.77308	0.423419
937	Television watching (MVMR adjusted for BMI)	Squamous cell lung cancer || id:ieu-a-967	dPzbCf	ieu-a-967	18313	rs10932837	-2.18588	2.15138	0.309614
938	Television watching (MVMR adjusted for BMI)	Squamous cell lung cancer || id:ieu-a-967	dPzbCf	ieu-a-967	18313	rs10947452	-0.401196	2.07007	0.846326
939	Television watching (MVMR adjusted for BMI)	Squamous cell lung cancer || id:ieu-a-967	dPzbCf	ieu-a-967	18313	rs11130793	-0.824262	2.16785	0.703781
940	Television watching (MVMR adjusted for BMI)	Squamous cell lung cancer || id:ieu-a-967	dPzbCf	ieu-a-967	18313	rs11218575	4.51717	1.7704	0.0107261
941	Television watching (MVMR adjusted for BMI)	Squamous cell lung cancer || id:ieu-a-967	dPzbCf	ieu-a-967	18313	rs11245482	2.79128	2.24438	0.213621
942	Television watching (MVMR adjusted for BMI)	Squamous cell lung cancer || id:ieu-a-967	dPzbCf	ieu-a-967	18313	rs114720649	-1.2887	2.56321	0.615128
943	Television watching (MVMR adjusted for BMI)	Squamous cell lung cancer || id:ieu-a-967	dPzbCf	ieu-a-967	18313	rs11689199	-2.34961	1.63017	0.149492
944	Television watching (MVMR adjusted for BMI)	Squamous cell lung cancer || id:ieu-a-967	dPzbCf	ieu-a-967	18313	rs11714337	-0.0639	1.99593	0.97446
945	Television watching (MVMR adjusted for BMI)	Squamous cell lung cancer || id:ieu-a-967	dPzbCf	ieu-a-967	18313	rs11917871	-0.422479	1.694	0.803053
946	Television watching (MVMR adjusted for BMI)	Squamous cell lung cancer || id:ieu-a-967	dPzbCf	ieu-a-967	18313	rs12105701	2.93115	2.09592	0.161963
947	Television watching (MVMR adjusted for BMI)	Squamous cell lung cancer || id:ieu-a-967	dPzbCf	ieu-a-967	18313	rs12342024	-0.15702	1.97148	0.936519
948	Television watching (MVMR adjusted for BMI)	Squamous cell lung cancer || id:ieu-a-967	dPzbCf	ieu-a-967	18313	rs12491503	-3.25304	1.97843	0.100124
949	Television watching (MVMR adjusted for BMI)	Squamous cell lung cancer || id:ieu-a-967	dPzbCf	ieu-a-967	18313	rs12554512	0.505914	1.37605	0.713129
950	Television watching (MVMR adjusted for BMI)	Squamous cell lung cancer || id:ieu-a-967	dPzbCf	ieu-a-967	18313	rs13107325	0.484921	1.82679	0.790663
951	Television watching (MVMR adjusted for BMI)	Squamous cell lung cancer || id:ieu-a-967	dPzbCf	ieu-a-967	18313	rs1451533	0.295364	1.96325	0.880412
952	Television watching (MVMR adjusted for BMI)	Squamous cell lung cancer || id:ieu-a-967	dPzbCf	ieu-a-967	18313	rs148544378	-0.388611	2.51983	0.877435
953	Television watching (MVMR adjusted for BMI)	Squamous cell lung cancer || id:ieu-a-967	dPzbCf	ieu-a-967	18313	rs148648822	1.40075	2.30822	0.543949
954	Television watching (MVMR adjusted for BMI)	Squamous cell lung cancer || id:ieu-a-967	dPzbCf	ieu-a-967	18313	rs17207890	3.55827	1.73463	0.0402359
955	Television watching (MVMR adjusted for BMI)	Squamous cell lung cancer || id:ieu-a-967	dPzbCf	ieu-a-967	18313	rs17727474	2.71727	1.87994	0.148345
956	Television watching (MVMR adjusted for BMI)	Squamous cell lung cancer || id:ieu-a-967	dPzbCf	ieu-a-967	18313	rs182355396	1.13357	1.77392	0.52281
957	Television watching (MVMR adjusted for BMI)	Squamous cell lung cancer || id:ieu-a-967	dPzbCf	ieu-a-967	18313	rs1913808	1.19966	1.92947	0.534101
958	Television watching (MVMR adjusted for BMI)	Squamous cell lung cancer || id:ieu-a-967	dPzbCf	ieu-a-967	18313	rs2034768	0.8697	1.86073	0.640216
959	Television watching (MVMR adjusted for BMI)	Squamous cell lung cancer || id:ieu-a-967	dPzbCf	ieu-a-967	18313	rs2073869	-1.53646	1.83953	0.403579
960	Television watching (MVMR adjusted for BMI)	Squamous cell lung cancer || id:ieu-a-967	dPzbCf	ieu-a-967	18313	rs2173650	2.15071	2.16233	0.319919
961	Television watching (MVMR adjusted for BMI)	Squamous cell lung cancer || id:ieu-a-967	dPzbCf	ieu-a-967	18313	rs2184364	1.16135	2.02588	0.56647
962	Television watching (MVMR adjusted for BMI)	Squamous cell lung cancer || id:ieu-a-967	dPzbCf	ieu-a-967	18313	rs2291681	0.198641	2.12462	0.92551
963	Television watching (MVMR adjusted for BMI)	Squamous cell lung cancer || id:ieu-a-967	dPzbCf	ieu-a-967	18313	rs2460	-1.11385	2.11107	0.597759
964	Television watching (MVMR adjusted for BMI)	Squamous cell lung cancer || id:ieu-a-967	dPzbCf	ieu-a-967	18313	rs2616830	0.0821956	1.71562	0.961788
965	Television watching (MVMR adjusted for BMI)	Squamous cell lung cancer || id:ieu-a-967	dPzbCf	ieu-a-967	18313	rs262890	4.20926	1.69168	0.012839
966	Television watching (MVMR adjusted for BMI)	Squamous cell lung cancer || id:ieu-a-967	dPzbCf	ieu-a-967	18313	rs2971640	4.42081	2.22185	0.046624
967	Television watching (MVMR adjusted for BMI)	Squamous cell lung cancer || id:ieu-a-967	dPzbCf	ieu-a-967	18313	rs303753	3.77429	2.17714	0.0829898
968	Television watching (MVMR adjusted for BMI)	Squamous cell lung cancer || id:ieu-a-967	dPzbCf	ieu-a-967	18313	rs34811474	4.36325	2.64233	0.0986798
969	Television watching (MVMR adjusted for BMI)	Squamous cell lung cancer || id:ieu-a-967	dPzbCf	ieu-a-967	18313	rs34864022	1.1548	2.19073	0.598105
970	Television watching (MVMR adjusted for BMI)	Squamous cell lung cancer || id:ieu-a-967	dPzbCf	ieu-a-967	18313	rs374722	0.997138	1.61142	0.536051
971	Television watching (MVMR adjusted for BMI)	Squamous cell lung cancer || id:ieu-a-967	dPzbCf	ieu-a-967	18313	rs3754970	2.39435	1.76213	0.174216
972	Television watching (MVMR adjusted for BMI)	Squamous cell lung cancer || id:ieu-a-967	dPzbCf	ieu-a-967	18313	rs3796386	-0.170918	1.06273	0.872228
973	Television watching (MVMR adjusted for BMI)	Squamous cell lung cancer || id:ieu-a-967	dPzbCf	ieu-a-967	18313	rs4382592	6.21371	2.28807	0.00661359
974	Television watching (MVMR adjusted for BMI)	Squamous cell lung cancer || id:ieu-a-967	dPzbCf	ieu-a-967	18313	rs4577309	5.22478	1.85769	0.00491556
975	Television watching (MVMR adjusted for BMI)	Squamous cell lung cancer || id:ieu-a-967	dPzbCf	ieu-a-967	18313	rs4845364	0.782307	1.8048	0.664681
976	Television watching (MVMR adjusted for BMI)	Squamous cell lung cancer || id:ieu-a-967	dPzbCf	ieu-a-967	18313	rs4973576	0.70316	2.02707	0.728677
977	Television watching (MVMR adjusted for BMI)	Squamous cell lung cancer || id:ieu-a-967	dPzbCf	ieu-a-967	18313	rs553397860	-2.02356	2.29824	0.378597
978	Television watching (MVMR adjusted for BMI)	Squamous cell lung cancer || id:ieu-a-967	dPzbCf	ieu-a-967	18313	rs56103247	1.48722	2.29503	0.516973
979	Television watching (MVMR adjusted for BMI)	Squamous cell lung cancer || id:ieu-a-967	dPzbCf	ieu-a-967	18313	rs56398417	-3.31651	2.30886	0.15088
980	Television watching (MVMR adjusted for BMI)	Squamous cell lung cancer || id:ieu-a-967	dPzbCf	ieu-a-967	18313	rs56858768	-0.957987	1.97093	0.626926
981	Television watching (MVMR adjusted for BMI)	Squamous cell lung cancer || id:ieu-a-967	dPzbCf	ieu-a-967	18313	rs57585211	0.497304	2.20071	0.821221
982	Television watching (MVMR adjusted for BMI)	Squamous cell lung cancer || id:ieu-a-967	dPzbCf	ieu-a-967	18313	rs6131281	-3.26134	1.82787	0.0743868
983	Television watching (MVMR adjusted for BMI)	Squamous cell lung cancer || id:ieu-a-967	dPzbCf	ieu-a-967	18313	rs62379379	3.82018	2.20115	0.0826457
984	Television watching (MVMR adjusted for BMI)	Squamous cell lung cancer || id:ieu-a-967	dPzbCf	ieu-a-967	18313	rs62641636	2.73239	2.1535	0.204508
985	Television watching (MVMR adjusted for BMI)	Squamous cell lung cancer || id:ieu-a-967	dPzbCf	ieu-a-967	18313	rs6472942	1.13853	2.16015	0.598152
986	Television watching (MVMR adjusted for BMI)	Squamous cell lung cancer || id:ieu-a-967	dPzbCf	ieu-a-967	18313	rs66852340	0.06585	1.83878	0.971432
987	Television watching (MVMR adjusted for BMI)	Squamous cell lung cancer || id:ieu-a-967	dPzbCf	ieu-a-967	18313	rs6721975	3.47095	1.96424	0.077216
988	Television watching (MVMR adjusted for BMI)	Squamous cell lung cancer || id:ieu-a-967	dPzbCf	ieu-a-967	18313	rs6797840	-1.34076	1.74919	0.443375
989	Television watching (MVMR adjusted for BMI)	Squamous cell lung cancer || id:ieu-a-967	dPzbCf	ieu-a-967	18313	rs6825241	-1.2237	1.56982	0.435677
990	Television watching (MVMR adjusted for BMI)	Squamous cell lung cancer || id:ieu-a-967	dPzbCf	ieu-a-967	18313	rs6850494	1.01046	2.065	0.624609
991	Television watching (MVMR adjusted for BMI)	Squamous cell lung cancer || id:ieu-a-967	dPzbCf	ieu-a-967	18313	rs6905544	0.0907095	1.49426	0.951594
992	Television watching (MVMR adjusted for BMI)	Squamous cell lung cancer || id:ieu-a-967	dPzbCf	ieu-a-967	18313	rs7184800	-0.809753	1.78447	0.649989
993	Television watching (MVMR adjusted for BMI)	Squamous cell lung cancer || id:ieu-a-967	dPzbCf	ieu-a-967	18313	rs7189927	3.79661	2.03513	0.0621064
994	Television watching (MVMR adjusted for BMI)	Squamous cell lung cancer || id:ieu-a-967	dPzbCf	ieu-a-967	18313	rs72725224	-2.55139	2.05196	0.213723
995	Television watching (MVMR adjusted for BMI)	Squamous cell lung cancer || id:ieu-a-967	dPzbCf	ieu-a-967	18313	rs72781699	-1.27522	1.79479	0.477386
996	Television watching (MVMR adjusted for BMI)	Squamous cell lung cancer || id:ieu-a-967	dPzbCf	ieu-a-967	18313	rs72828890	-1.22171	2.549	0.631732
997	Television watching (MVMR adjusted for BMI)	Squamous cell lung cancer || id:ieu-a-967	dPzbCf	ieu-a-967	18313	rs72834698	3.07057	1.66291	0.0648196
998	Television watching (MVMR adjusted for BMI)	Squamous cell lung cancer || id:ieu-a-967	dPzbCf	ieu-a-967	18313	rs74802478	4.01502	2.06918	0.0523318
999	Television watching (MVMR adjusted for BMI)	Squamous cell lung cancer || id:ieu-a-967	dPzbCf	ieu-a-967	18313	rs7564130	3.01957	1.94493	0.120535
1000	Television watching (MVMR adjusted for BMI)	Squamous cell lung cancer || id:ieu-a-967	dPzbCf	ieu-a-967	18313	rs7693703	-2.1129	2.076	0.308784
1001	Television watching (MVMR adjusted for BMI)	Squamous cell lung cancer || id:ieu-a-967	dPzbCf	ieu-a-967	18313	rs7716447	3.9369	3.05069	0.196879
1002	Television watching (MVMR adjusted for BMI)	Squamous cell lung cancer || id:ieu-a-967	dPzbCf	ieu-a-967	18313	rs7788008	-1.69089	2.17146	0.436163
1003	Television watching (MVMR adjusted for BMI)	Squamous cell lung cancer || id:ieu-a-967	dPzbCf	ieu-a-967	18313	rs7834121	-2.6443	2.09586	0.207064
1004	Television watching (MVMR adjusted for BMI)	Squamous cell lung cancer || id:ieu-a-967	dPzbCf	ieu-a-967	18313	rs9471333	0.358931	2.11531	0.86526
1005	Television watching (MVMR adjusted for BMI)	Squamous cell lung cancer || id:ieu-a-967	dPzbCf	ieu-a-967	18313	rs9563168	-2.37021	1.94444	0.222857
1006	Television watching (MVMR adjusted for BMI)	Squamous cell lung cancer || id:ieu-a-967	dPzbCf	ieu-a-967	18313	rs9569734	-2.07417	2.05447	0.312694
1007	Television watching (MVMR adjusted for BMI)	Squamous cell lung cancer || id:ieu-a-967	dPzbCf	ieu-a-967	18313	rs9867121	-0.895084	1.95837	0.647631
1008	Television watching (MVMR adjusted for BMI)	Squamous cell lung cancer || id:ieu-a-967	dPzbCf	ieu-a-967	18313	rs9902312	-2.30554	1.99127	0.246935
1009	Television watching (MVMR adjusted for BMI)	Squamous cell lung cancer || id:ieu-a-967	dPzbCf	ieu-a-967	18313	rs9964724	1.80239	1.67422	0.28168
1010	Television watching (MVMR adjusted for BMI)	Squamous cell lung cancer || id:ieu-a-967	dPzbCf	ieu-a-967	18313	All - Inverse variance weighted	0.563317	0.243728	0.0208187
1011	Television watching (MVMR adjusted for BMI)	Squamous cell lung cancer || id:ieu-a-967	dPzbCf	ieu-a-967	18313	All - MR Egger	-0.0745206	1.06689	0.944498
1012	Television watching (MVMR adjusted for education)	Lung adenocarcinoma || id:ieu-a-965	rWtAcu	ieu-a-965	18336	rs10041724	4.37085	1.77656	0.0138823
1013	Television watching (MVMR adjusted for education)	Lung adenocarcinoma || id:ieu-a-965	rWtAcu	ieu-a-965	18336	rs10054327	-0.440873	1.65859	0.790384
1014	Television watching (MVMR adjusted for education)	Lung adenocarcinoma || id:ieu-a-965	rWtAcu	ieu-a-965	18336	rs10189857	0.984545	1.41565	0.48676
1015	Television watching (MVMR adjusted for education)	Lung adenocarcinoma || id:ieu-a-965	rWtAcu	ieu-a-965	18336	rs1031423	-0.601811	1.83268	0.742627
1016	Television watching (MVMR adjusted for education)	Lung adenocarcinoma || id:ieu-a-965	rWtAcu	ieu-a-965	18336	rs10771746	6.1526	2.35957	0.00912041
1017	Television watching (MVMR adjusted for education)	Lung adenocarcinoma || id:ieu-a-965	rWtAcu	ieu-a-965	18336	rs10772643	-2.33013	1.66676	0.162114
1018	Television watching (MVMR adjusted for education)	Lung adenocarcinoma || id:ieu-a-965	rWtAcu	ieu-a-965	18336	rs10876864	-0.0701987	2.137	0.973795
1019	Television watching (MVMR adjusted for education)	Lung adenocarcinoma || id:ieu-a-965	rWtAcu	ieu-a-965	18336	rs10932837	0.576152	2.077	0.781476
1020	Television watching (MVMR adjusted for education)	Lung adenocarcinoma || id:ieu-a-965	rWtAcu	ieu-a-965	18336	rs10947452	-1.41449	2.03407	0.486807
1021	Television watching (MVMR adjusted for education)	Lung adenocarcinoma || id:ieu-a-965	rWtAcu	ieu-a-965	18336	rs11130793	1.59504	2.11092	0.449882
1022	Television watching (MVMR adjusted for education)	Lung adenocarcinoma || id:ieu-a-965	rWtAcu	ieu-a-965	18336	rs111901094	-3.34977	2.39182	0.161361
1023	Television watching (MVMR adjusted for education)	Lung adenocarcinoma || id:ieu-a-965	rWtAcu	ieu-a-965	18336	rs11218575	0.777587	1.85453	0.675004
1024	Television watching (MVMR adjusted for education)	Lung adenocarcinoma || id:ieu-a-965	rWtAcu	ieu-a-965	18336	rs11245482	1.52698	2.21677	0.49093
1025	Television watching (MVMR adjusted for education)	Lung adenocarcinoma || id:ieu-a-965	rWtAcu	ieu-a-965	18336	rs114720649	-0.531256	2.5745	0.836515
1026	Television watching (MVMR adjusted for education)	Lung adenocarcinoma || id:ieu-a-965	rWtAcu	ieu-a-965	18336	rs11689199	2.96085	1.49361	0.0474408
1027	Television watching (MVMR adjusted for education)	Lung adenocarcinoma || id:ieu-a-965	rWtAcu	ieu-a-965	18336	rs11714337	-0.397037	2.00379	0.842933
1028	Television watching (MVMR adjusted for education)	Lung adenocarcinoma || id:ieu-a-965	rWtAcu	ieu-a-965	18336	rs11917871	0.298639	1.66147	0.857354
1029	Television watching (MVMR adjusted for education)	Lung adenocarcinoma || id:ieu-a-965	rWtAcu	ieu-a-965	18336	rs12105701	1.84015	2.10415	0.38183
1030	Television watching (MVMR adjusted for education)	Lung adenocarcinoma || id:ieu-a-965	rWtAcu	ieu-a-965	18336	rs12342024	0.907348	2.0911	0.664354
1031	Television watching (MVMR adjusted for education)	Lung adenocarcinoma || id:ieu-a-965	rWtAcu	ieu-a-965	18336	rs1243182	2.15491	1.58842	0.174897
1032	Television watching (MVMR adjusted for education)	Lung adenocarcinoma || id:ieu-a-965	rWtAcu	ieu-a-965	18336	rs12491503	1.22473	2.08879	0.55765
1033	Television watching (MVMR adjusted for education)	Lung adenocarcinoma || id:ieu-a-965	rWtAcu	ieu-a-965	18336	rs12554512	-0.467837	1.40514	0.739175
1034	Television watching (MVMR adjusted for education)	Lung adenocarcinoma || id:ieu-a-965	rWtAcu	ieu-a-965	18336	rs13107325	0.827914	1.76845	0.639671
1035	Television watching (MVMR adjusted for education)	Lung adenocarcinoma || id:ieu-a-965	rWtAcu	ieu-a-965	18336	rs1451533	0.555834	2.00294	0.781389
1036	Television watching (MVMR adjusted for education)	Lung adenocarcinoma || id:ieu-a-965	rWtAcu	ieu-a-965	18336	rs148544378	0.45383	2.37215	0.848278
1037	Television watching (MVMR adjusted for education)	Lung adenocarcinoma || id:ieu-a-965	rWtAcu	ieu-a-965	18336	rs148648822	-3.11711	2.15389	0.147841
1038	Television watching (MVMR adjusted for education)	Lung adenocarcinoma || id:ieu-a-965	rWtAcu	ieu-a-965	18336	rs17207890	4.82822	1.684	0.00414235
1039	Television watching (MVMR adjusted for education)	Lung adenocarcinoma || id:ieu-a-965	rWtAcu	ieu-a-965	18336	rs17727474	3.0521	1.8745	0.103478
1040	Television watching (MVMR adjusted for education)	Lung adenocarcinoma || id:ieu-a-965	rWtAcu	ieu-a-965	18336	rs182355396	2.74409	1.9552	0.160473
1041	Television watching (MVMR adjusted for education)	Lung adenocarcinoma || id:ieu-a-965	rWtAcu	ieu-a-965	18336	rs1913808	-0.00966593	1.97173	0.996089
1042	Television watching (MVMR adjusted for education)	Lung adenocarcinoma || id:ieu-a-965	rWtAcu	ieu-a-965	18336	rs2034768	1.07889	1.87	0.563977
1043	Television watching (MVMR adjusted for education)	Lung adenocarcinoma || id:ieu-a-965	rWtAcu	ieu-a-965	18336	rs2045147	0.272977	2.11885	0.89749
1044	Television watching (MVMR adjusted for education)	Lung adenocarcinoma || id:ieu-a-965	rWtAcu	ieu-a-965	18336	rs2073869	-1.39898	1.88195	0.457259
1045	Television watching (MVMR adjusted for education)	Lung adenocarcinoma || id:ieu-a-965	rWtAcu	ieu-a-965	18336	rs2173650	0.665528	2.17617	0.759737
1046	Television watching (MVMR adjusted for education)	Lung adenocarcinoma || id:ieu-a-965	rWtAcu	ieu-a-965	18336	rs2184364	3.81384	1.972	0.0531134
1047	Television watching (MVMR adjusted for education)	Lung adenocarcinoma || id:ieu-a-965	rWtAcu	ieu-a-965	18336	rs2291681	-0.258182	2.13569	0.903779
1048	Television watching (MVMR adjusted for education)	Lung adenocarcinoma || id:ieu-a-965	rWtAcu	ieu-a-965	18336	rs2447098	0.594577	1.8442	0.747147
1049	Television watching (MVMR adjusted for education)	Lung adenocarcinoma || id:ieu-a-965	rWtAcu	ieu-a-965	18336	rs2460	-3.59494	2.03633	0.0774968
1050	Television watching (MVMR adjusted for education)	Lung adenocarcinoma || id:ieu-a-965	rWtAcu	ieu-a-965	18336	rs2584597	-1.16797	2.1512	0.587171
1051	Television watching (MVMR adjusted for education)	Lung adenocarcinoma || id:ieu-a-965	rWtAcu	ieu-a-965	18336	rs2616830	0.918963	1.73356	0.596042
1052	Television watching (MVMR adjusted for education)	Lung adenocarcinoma || id:ieu-a-965	rWtAcu	ieu-a-965	18336	rs262890	1.41548	1.63895	0.38778
1053	Television watching (MVMR adjusted for education)	Lung adenocarcinoma || id:ieu-a-965	rWtAcu	ieu-a-965	18336	rs263771	1.20211	2.04888	0.557396
1054	Television watching (MVMR adjusted for education)	Lung adenocarcinoma || id:ieu-a-965	rWtAcu	ieu-a-965	18336	rs2971640	2.81902	2.17323	0.194578
1055	Television watching (MVMR adjusted for education)	Lung adenocarcinoma || id:ieu-a-965	rWtAcu	ieu-a-965	18336	rs303753	0.282014	2.07507	0.891896
1056	Television watching (MVMR adjusted for education)	Lung adenocarcinoma || id:ieu-a-965	rWtAcu	ieu-a-965	18336	rs34811474	-0.881347	2.86913	0.758705
1057	Television watching (MVMR adjusted for education)	Lung adenocarcinoma || id:ieu-a-965	rWtAcu	ieu-a-965	18336	rs34864022	-0.340425	2.14846	0.874102
1058	Television watching (MVMR adjusted for education)	Lung adenocarcinoma || id:ieu-a-965	rWtAcu	ieu-a-965	18336	rs374722	0.450842	1.58796	0.776477
1059	Television watching (MVMR adjusted for education)	Lung adenocarcinoma || id:ieu-a-965	rWtAcu	ieu-a-965	18336	rs3754970	-3.39918	1.93513	0.0789926
1060	Television watching (MVMR adjusted for education)	Lung adenocarcinoma || id:ieu-a-965	rWtAcu	ieu-a-965	18336	rs3796386	1.39549	1.1035	0.206014
1061	Television watching (MVMR adjusted for education)	Lung adenocarcinoma || id:ieu-a-965	rWtAcu	ieu-a-965	18336	rs4382592	2.40354	2.16943	0.2679
1062	Television watching (MVMR adjusted for education)	Lung adenocarcinoma || id:ieu-a-965	rWtAcu	ieu-a-965	18336	rs4577309	2.79631	1.78869	0.117975
1063	Television watching (MVMR adjusted for education)	Lung adenocarcinoma || id:ieu-a-965	rWtAcu	ieu-a-965	18336	rs4845364	1.41961	1.79	0.427733
1064	Television watching (MVMR adjusted for education)	Lung adenocarcinoma || id:ieu-a-965	rWtAcu	ieu-a-965	18336	rs4973576	0.123181	2.0482	0.952043
1065	Television watching (MVMR adjusted for education)	Lung adenocarcinoma || id:ieu-a-965	rWtAcu	ieu-a-965	18336	rs553397860	-0.699006	2.25782	0.756871
1066	Television watching (MVMR adjusted for education)	Lung adenocarcinoma || id:ieu-a-965	rWtAcu	ieu-a-965	18336	rs56103247	3.04694	2.1787	0.161959
1067	Television watching (MVMR adjusted for education)	Lung adenocarcinoma || id:ieu-a-965	rWtAcu	ieu-a-965	18336	rs56398417	-1.45529	2.24986	0.517739
1068	Television watching (MVMR adjusted for education)	Lung adenocarcinoma || id:ieu-a-965	rWtAcu	ieu-a-965	18336	rs56858768	0.380578	2.03113	0.851369
1069	Television watching (MVMR adjusted for education)	Lung adenocarcinoma || id:ieu-a-965	rWtAcu	ieu-a-965	18336	rs57585211	2.55336	2.23588	0.253458
1070	Television watching (MVMR adjusted for education)	Lung adenocarcinoma || id:ieu-a-965	rWtAcu	ieu-a-965	18336	rs6131281	-1.71044	1.78506	0.337963
1071	Television watching (MVMR adjusted for education)	Lung adenocarcinoma || id:ieu-a-965	rWtAcu	ieu-a-965	18336	rs6141814	0.400163	2.02993	0.843725
1072	Television watching (MVMR adjusted for education)	Lung adenocarcinoma || id:ieu-a-965	rWtAcu	ieu-a-965	18336	rs62332760	-0.234671	2.02507	0.907746
1073	Television watching (MVMR adjusted for education)	Lung adenocarcinoma || id:ieu-a-965	rWtAcu	ieu-a-965	18336	rs62379379	3.22395	2.26942	0.155433
1074	Television watching (MVMR adjusted for education)	Lung adenocarcinoma || id:ieu-a-965	rWtAcu	ieu-a-965	18336	rs62641636	1.90804	2.18329	0.382155
1075	Television watching (MVMR adjusted for education)	Lung adenocarcinoma || id:ieu-a-965	rWtAcu	ieu-a-965	18336	rs6472942	-0.815462	2.09685	0.697351
1076	Television watching (MVMR adjusted for education)	Lung adenocarcinoma || id:ieu-a-965	rWtAcu	ieu-a-965	18336	rs648044	3.34901	2.13264	0.116332
1077	Television watching (MVMR adjusted for education)	Lung adenocarcinoma || id:ieu-a-965	rWtAcu	ieu-a-965	18336	rs6673341	2.11665	1.7656	0.230596
1078	Television watching (MVMR adjusted for education)	Lung adenocarcinoma || id:ieu-a-965	rWtAcu	ieu-a-965	18336	rs66852340	1.61469	1.89389	0.393891
1079	Television watching (MVMR adjusted for education)	Lung adenocarcinoma || id:ieu-a-965	rWtAcu	ieu-a-965	18336	rs6721975	0.6601	2.05512	0.74806
1080	Television watching (MVMR adjusted for education)	Lung adenocarcinoma || id:ieu-a-965	rWtAcu	ieu-a-965	18336	rs6797840	0.147173	1.70719	0.931301
1081	Television watching (MVMR adjusted for education)	Lung adenocarcinoma || id:ieu-a-965	rWtAcu	ieu-a-965	18336	rs6825241	1.09654	1.63706	0.50297
1082	Television watching (MVMR adjusted for education)	Lung adenocarcinoma || id:ieu-a-965	rWtAcu	ieu-a-965	18336	rs6850494	2.95893	2.11943	0.162685
1083	Television watching (MVMR adjusted for education)	Lung adenocarcinoma || id:ieu-a-965	rWtAcu	ieu-a-965	18336	rs6905544	-2.13116	1.54537	0.167876
1084	Television watching (MVMR adjusted for education)	Lung adenocarcinoma || id:ieu-a-965	rWtAcu	ieu-a-965	18336	rs7184800	-0.563586	1.76335	0.749264
1085	Television watching (MVMR adjusted for education)	Lung adenocarcinoma || id:ieu-a-965	rWtAcu	ieu-a-965	18336	rs7189927	1.59595	1.99253	0.423153
1086	Television watching (MVMR adjusted for education)	Lung adenocarcinoma || id:ieu-a-965	rWtAcu	ieu-a-965	18336	rs7248205	-0.177864	2.09157	0.932231
1087	Television watching (MVMR adjusted for education)	Lung adenocarcinoma || id:ieu-a-965	rWtAcu	ieu-a-965	18336	rs72725224	-1.6226	2.02443	0.422838
1088	Television watching (MVMR adjusted for education)	Lung adenocarcinoma || id:ieu-a-965	rWtAcu	ieu-a-965	18336	rs72781699	0.651163	1.82626	0.721425
1089	Television watching (MVMR adjusted for education)	Lung adenocarcinoma || id:ieu-a-965	rWtAcu	ieu-a-965	18336	rs72828890	0.762068	2.47426	0.758084
1090	Television watching (MVMR adjusted for education)	Lung adenocarcinoma || id:ieu-a-965	rWtAcu	ieu-a-965	18336	rs72834698	1.4736	1.72839	0.393888
1091	Television watching (MVMR adjusted for education)	Lung adenocarcinoma || id:ieu-a-965	rWtAcu	ieu-a-965	18336	rs74802478	2.15365	2.10224	0.305619
1092	Television watching (MVMR adjusted for education)	Lung adenocarcinoma || id:ieu-a-965	rWtAcu	ieu-a-965	18336	rs749671	0.297959	1.75956	0.865531
1093	Television watching (MVMR adjusted for education)	Lung adenocarcinoma || id:ieu-a-965	rWtAcu	ieu-a-965	18336	rs7564130	0.581721	1.8874	0.75792
1094	Television watching (MVMR adjusted for education)	Lung adenocarcinoma || id:ieu-a-965	rWtAcu	ieu-a-965	18336	rs7693703	-2.92737	2.1007	0.163461
1095	Television watching (MVMR adjusted for education)	Lung adenocarcinoma || id:ieu-a-965	rWtAcu	ieu-a-965	18336	rs7716447	-1.07837	2.833	0.703466
1096	Television watching (MVMR adjusted for education)	Lung adenocarcinoma || id:ieu-a-965	rWtAcu	ieu-a-965	18336	rs7788008	-2.86691	2.20146	0.192822
1097	Television watching (MVMR adjusted for education)	Lung adenocarcinoma || id:ieu-a-965	rWtAcu	ieu-a-965	18336	rs7834121	2.67044	1.94657	0.170104
1098	Television watching (MVMR adjusted for education)	Lung adenocarcinoma || id:ieu-a-965	rWtAcu	ieu-a-965	18336	rs78394231	0.0856371	2.16848	0.968498
1099	Television watching (MVMR adjusted for education)	Lung adenocarcinoma || id:ieu-a-965	rWtAcu	ieu-a-965	18336	rs801733	-2.45014	1.75012	0.161517
1100	Television watching (MVMR adjusted for education)	Lung adenocarcinoma || id:ieu-a-965	rWtAcu	ieu-a-965	18336	rs8756	-1.39693	2.14854	0.515578
1101	Television watching (MVMR adjusted for education)	Lung adenocarcinoma || id:ieu-a-965	rWtAcu	ieu-a-965	18336	rs9471333	0.551785	2.125	0.795123
1102	Television watching (MVMR adjusted for education)	Lung adenocarcinoma || id:ieu-a-965	rWtAcu	ieu-a-965	18336	rs9563168	-2.24097	1.91928	0.242964
1103	Television watching (MVMR adjusted for education)	Lung adenocarcinoma || id:ieu-a-965	rWtAcu	ieu-a-965	18336	rs9569734	1.33306	1.95153	0.494553
1104	Television watching (MVMR adjusted for education)	Lung adenocarcinoma || id:ieu-a-965	rWtAcu	ieu-a-965	18336	rs9834970	-2.56625	2.16	0.234802
1105	Television watching (MVMR adjusted for education)	Lung adenocarcinoma || id:ieu-a-965	rWtAcu	ieu-a-965	18336	rs9867121	-1.15966	1.938	0.549587
1106	Television watching (MVMR adjusted for education)	Lung adenocarcinoma || id:ieu-a-965	rWtAcu	ieu-a-965	18336	rs9902312	-1.14465	1.9452	0.55623
1107	Television watching (MVMR adjusted for education)	Lung adenocarcinoma || id:ieu-a-965	rWtAcu	ieu-a-965	18336	rs9964724	0.0379315	1.623	0.981354
1108	Television watching (MVMR adjusted for education)	Lung adenocarcinoma || id:ieu-a-965	rWtAcu	ieu-a-965	18336	All - Inverse variance weighted	0.515708	0.195901	0.0084762
1109	Television watching (MVMR adjusted for education)	Lung adenocarcinoma || id:ieu-a-965	rWtAcu	ieu-a-965	18336	All - MR Egger	0.777845	0.906483	0.393025
1110	Television watching (MVMR adjusted for education)	Lung cancer || id:ieu-a-966	rWtAcu	ieu-a-966	27209	rs10041724	1.70008	1.21389	0.161356
1111	Television watching (MVMR adjusted for education)	Lung cancer || id:ieu-a-966	rWtAcu	ieu-a-966	27209	rs10054327	0.0523174	1.07159	0.961061
1112	Television watching (MVMR adjusted for education)	Lung cancer || id:ieu-a-966	rWtAcu	ieu-a-966	27209	rs10189857	1.66206	0.9288	0.0735382
1113	Television watching (MVMR adjusted for education)	Lung cancer || id:ieu-a-966	rWtAcu	ieu-a-966	27209	rs1031423	-1.33718	1.23205	0.277775
1114	Television watching (MVMR adjusted for education)	Lung cancer || id:ieu-a-966	rWtAcu	ieu-a-966	27209	rs10771746	2.73861	1.46907	0.062297
1115	Television watching (MVMR adjusted for education)	Lung cancer || id:ieu-a-966	rWtAcu	ieu-a-966	27209	rs10772643	0.43202	1.13712	0.704001
1116	Television watching (MVMR adjusted for education)	Lung cancer || id:ieu-a-966	rWtAcu	ieu-a-966	27209	rs10876864	2.3025	1.35185	0.0885257
1117	Television watching (MVMR adjusted for education)	Lung cancer || id:ieu-a-966	rWtAcu	ieu-a-966	27209	rs10932837	0.0812738	1.36738	0.952604
1118	Television watching (MVMR adjusted for education)	Lung cancer || id:ieu-a-966	rWtAcu	ieu-a-966	27209	rs10947452	0.0514101	1.36171	0.969884
1119	Television watching (MVMR adjusted for education)	Lung cancer || id:ieu-a-966	rWtAcu	ieu-a-966	27209	rs11130793	-0.0159983	1.40238	0.990898
1120	Television watching (MVMR adjusted for education)	Lung cancer || id:ieu-a-966	rWtAcu	ieu-a-966	27209	rs111901094	-1.62506	1.61647	0.314744
1121	Television watching (MVMR adjusted for education)	Lung cancer || id:ieu-a-966	rWtAcu	ieu-a-966	27209	rs11218575	1.73135	1.1934	0.146843
1122	Television watching (MVMR adjusted for education)	Lung cancer || id:ieu-a-966	rWtAcu	ieu-a-966	27209	rs11245482	1.37684	1.44338	0.340136
1123	Television watching (MVMR adjusted for education)	Lung cancer || id:ieu-a-966	rWtAcu	ieu-a-966	27209	rs114720649	-1.34159	1.66643	0.420779
1124	Television watching (MVMR adjusted for education)	Lung cancer || id:ieu-a-966	rWtAcu	ieu-a-966	27209	rs11689199	-0.00794389	1.02072	0.99379
1125	Television watching (MVMR adjusted for education)	Lung cancer || id:ieu-a-966	rWtAcu	ieu-a-966	27209	rs11714337	-0.105422	1.29571	0.935154
1126	Television watching (MVMR adjusted for education)	Lung cancer || id:ieu-a-966	rWtAcu	ieu-a-966	27209	rs11917871	-0.294848	1.09882	0.788445
1127	Television watching (MVMR adjusted for education)	Lung cancer || id:ieu-a-966	rWtAcu	ieu-a-966	27209	rs12105701	2.90685	1.36623	0.0333665
1128	Television watching (MVMR adjusted for education)	Lung cancer || id:ieu-a-966	rWtAcu	ieu-a-966	27209	rs12342024	0.541338	1.33681	0.685516
1129	Television watching (MVMR adjusted for education)	Lung cancer || id:ieu-a-966	rWtAcu	ieu-a-966	27209	rs1243182	0.531205	1.00626	0.597569
1130	Television watching (MVMR adjusted for education)	Lung cancer || id:ieu-a-966	rWtAcu	ieu-a-966	27209	rs12491503	1.22494	1.36457	0.369361
1131	Television watching (MVMR adjusted for education)	Lung cancer || id:ieu-a-966	rWtAcu	ieu-a-966	27209	rs12554512	0.344769	0.897667	0.700925
1132	Television watching (MVMR adjusted for education)	Lung cancer || id:ieu-a-966	rWtAcu	ieu-a-966	27209	rs13107325	1.59778	1.22497	0.192115
1133	Television watching (MVMR adjusted for education)	Lung cancer || id:ieu-a-966	rWtAcu	ieu-a-966	27209	rs1451533	1.30203	1.30412	0.318088
1134	Television watching (MVMR adjusted for education)	Lung cancer || id:ieu-a-966	rWtAcu	ieu-a-966	27209	rs148544378	1.19908	1.51749	0.429426
1135	Television watching (MVMR adjusted for education)	Lung cancer || id:ieu-a-966	rWtAcu	ieu-a-966	27209	rs148648822	-0.43716	1.45928	0.764503
1136	Television watching (MVMR adjusted for education)	Lung cancer || id:ieu-a-966	rWtAcu	ieu-a-966	27209	rs17207890	3.13594	1.13456	0.00570965
1137	Television watching (MVMR adjusted for education)	Lung cancer || id:ieu-a-966	rWtAcu	ieu-a-966	27209	rs17727474	1.80897	1.25211	0.148533
1138	Television watching (MVMR adjusted for education)	Lung cancer || id:ieu-a-966	rWtAcu	ieu-a-966	27209	rs182355396	1.54564	1.1908	0.194293
1139	Television watching (MVMR adjusted for education)	Lung cancer || id:ieu-a-966	rWtAcu	ieu-a-966	27209	rs1913808	-0.585224	1.29473	0.651266
1140	Television watching (MVMR adjusted for education)	Lung cancer || id:ieu-a-966	rWtAcu	ieu-a-966	27209	rs2034768	0.275364	1.2036	0.819037
1141	Television watching (MVMR adjusted for education)	Lung cancer || id:ieu-a-966	rWtAcu	ieu-a-966	27209	rs2045147	2.89832	1.43131	0.0428727
1142	Television watching (MVMR adjusted for education)	Lung cancer || id:ieu-a-966	rWtAcu	ieu-a-966	27209	rs2073869	0.182315	1.18611	0.877839
1143	Television watching (MVMR adjusted for education)	Lung cancer || id:ieu-a-966	rWtAcu	ieu-a-966	27209	rs2173650	1.64454	1.4135	0.244645
1144	Television watching (MVMR adjusted for education)	Lung cancer || id:ieu-a-966	rWtAcu	ieu-a-966	27209	rs2184364	0.666412	1.33794	0.618421
1145	Television watching (MVMR adjusted for education)	Lung cancer || id:ieu-a-966	rWtAcu	ieu-a-966	27209	rs2291681	0.370429	1.383	0.788819
1146	Television watching (MVMR adjusted for education)	Lung cancer || id:ieu-a-966	rWtAcu	ieu-a-966	27209	rs2447098	2.25656	1.1728	0.0543447
1147	Television watching (MVMR adjusted for education)	Lung cancer || id:ieu-a-966	rWtAcu	ieu-a-966	27209	rs2460	-3.42643	1.3272	0.00983148
1148	Television watching (MVMR adjusted for education)	Lung cancer || id:ieu-a-966	rWtAcu	ieu-a-966	27209	rs2584597	0.00220003	1.37547	0.998724
1149	Television watching (MVMR adjusted for education)	Lung cancer || id:ieu-a-966	rWtAcu	ieu-a-966	27209	rs2616830	0.211517	1.11981	0.850182
1150	Television watching (MVMR adjusted for education)	Lung cancer || id:ieu-a-966	rWtAcu	ieu-a-966	27209	rs262890	2.03286	1.06668	0.056679
1151	Television watching (MVMR adjusted for education)	Lung cancer || id:ieu-a-966	rWtAcu	ieu-a-966	27209	rs263771	1.96044	1.33065	0.140672
1152	Television watching (MVMR adjusted for education)	Lung cancer || id:ieu-a-966	rWtAcu	ieu-a-966	27209	rs2971640	2.88721	1.417	0.041595
1153	Television watching (MVMR adjusted for education)	Lung cancer || id:ieu-a-966	rWtAcu	ieu-a-966	27209	rs303753	2.17525	1.388	0.117072
1154	Television watching (MVMR adjusted for education)	Lung cancer || id:ieu-a-966	rWtAcu	ieu-a-966	27209	rs34811474	2.82954	1.7652	0.108944
1155	Television watching (MVMR adjusted for education)	Lung cancer || id:ieu-a-966	rWtAcu	ieu-a-966	27209	rs34864022	0.0965712	1.41727	0.945675
1156	Television watching (MVMR adjusted for education)	Lung cancer || id:ieu-a-966	rWtAcu	ieu-a-966	27209	rs374722	0.273558	1.03846	0.792221
1157	Television watching (MVMR adjusted for education)	Lung cancer || id:ieu-a-966	rWtAcu	ieu-a-966	27209	rs3754970	-0.646125	1.2034	0.591325
1158	Television watching (MVMR adjusted for education)	Lung cancer || id:ieu-a-966	rWtAcu	ieu-a-966	27209	rs3796386	1.00453	0.712846	0.158779
1159	Television watching (MVMR adjusted for education)	Lung cancer || id:ieu-a-966	rWtAcu	ieu-a-966	27209	rs4382592	3.22501	1.44179	0.0252981
1160	Television watching (MVMR adjusted for education)	Lung cancer || id:ieu-a-966	rWtAcu	ieu-a-966	27209	rs4577309	3.63532	1.18175	0.00209646
1161	Television watching (MVMR adjusted for education)	Lung cancer || id:ieu-a-966	rWtAcu	ieu-a-966	27209	rs4845364	1.06974	1.1728	0.361703
1162	Television watching (MVMR adjusted for education)	Lung cancer || id:ieu-a-966	rWtAcu	ieu-a-966	27209	rs4973576	-1.02186	1.3478	0.44835
1163	Television watching (MVMR adjusted for education)	Lung cancer || id:ieu-a-966	rWtAcu	ieu-a-966	27209	rs553397860	-0.233243	1.46006	0.873079
1164	Television watching (MVMR adjusted for education)	Lung cancer || id:ieu-a-966	rWtAcu	ieu-a-966	27209	rs56103247	1.4441	1.50003	0.335692
1165	Television watching (MVMR adjusted for education)	Lung cancer || id:ieu-a-966	rWtAcu	ieu-a-966	27209	rs56398417	-1.80459	1.4675	0.218809
1166	Television watching (MVMR adjusted for education)	Lung cancer || id:ieu-a-966	rWtAcu	ieu-a-966	27209	rs56858768	0.794647	1.32833	0.549688
1167	Television watching (MVMR adjusted for education)	Lung cancer || id:ieu-a-966	rWtAcu	ieu-a-966	27209	rs57585211	0.969206	1.43994	0.500892
1168	Television watching (MVMR adjusted for education)	Lung cancer || id:ieu-a-966	rWtAcu	ieu-a-966	27209	rs6131281	-2.15921	1.16781	0.0644676
1169	Television watching (MVMR adjusted for education)	Lung cancer || id:ieu-a-966	rWtAcu	ieu-a-966	27209	rs6141814	1.78146	1.346	0.185663
1170	Television watching (MVMR adjusted for education)	Lung cancer || id:ieu-a-966	rWtAcu	ieu-a-966	27209	rs62332760	-1.08223	1.30293	0.406193
1171	Television watching (MVMR adjusted for education)	Lung cancer || id:ieu-a-966	rWtAcu	ieu-a-966	27209	rs62379379	3.51731	1.45319	0.0155034
1172	Television watching (MVMR adjusted for education)	Lung cancer || id:ieu-a-966	rWtAcu	ieu-a-966	27209	rs62641636	2.06867	1.42136	0.145553
1173	Television watching (MVMR adjusted for education)	Lung cancer || id:ieu-a-966	rWtAcu	ieu-a-966	27209	rs6472942	0.324238	1.39769	0.816553
1174	Television watching (MVMR adjusted for education)	Lung cancer || id:ieu-a-966	rWtAcu	ieu-a-966	27209	rs648044	2.66274	1.39857	0.0569236
1175	Television watching (MVMR adjusted for education)	Lung cancer || id:ieu-a-966	rWtAcu	ieu-a-966	27209	rs6673341	1.23205	1.1666	0.290922
1176	Television watching (MVMR adjusted for education)	Lung cancer || id:ieu-a-966	rWtAcu	ieu-a-966	27209	rs66852340	-0.0188365	1.20228	0.9875
1177	Television watching (MVMR adjusted for education)	Lung cancer || id:ieu-a-966	rWtAcu	ieu-a-966	27209	rs6721975	1.14957	1.32076	0.384091
1178	Television watching (MVMR adjusted for education)	Lung cancer || id:ieu-a-966	rWtAcu	ieu-a-966	27209	rs6797840	-0.253983	1.11938	0.820504
1179	Television watching (MVMR adjusted for education)	Lung cancer || id:ieu-a-966	rWtAcu	ieu-a-966	27209	rs6825241	0.933494	1.06824	0.382191
1180	Television watching (MVMR adjusted for education)	Lung cancer || id:ieu-a-966	rWtAcu	ieu-a-966	27209	rs6850494	1.9623	1.35979	0.148994
1181	Television watching (MVMR adjusted for education)	Lung cancer || id:ieu-a-966	rWtAcu	ieu-a-966	27209	rs6905544	-1.41445	0.999316	0.156945
1182	Television watching (MVMR adjusted for education)	Lung cancer || id:ieu-a-966	rWtAcu	ieu-a-966	27209	rs7184800	-0.400457	1.15712	0.729281
1183	Television watching (MVMR adjusted for education)	Lung cancer || id:ieu-a-966	rWtAcu	ieu-a-966	27209	rs7189927	2.85767	1.31513	0.0297871
1184	Television watching (MVMR adjusted for education)	Lung cancer || id:ieu-a-966	rWtAcu	ieu-a-966	27209	rs7248205	-1.34043	1.34957	0.3206
1185	Television watching (MVMR adjusted for education)	Lung cancer || id:ieu-a-966	rWtAcu	ieu-a-966	27209	rs72725224	-2.15632	1.39187	0.121328
1186	Television watching (MVMR adjusted for education)	Lung cancer || id:ieu-a-966	rWtAcu	ieu-a-966	27209	rs72781699	0.409874	1.19863	0.732388
1187	Television watching (MVMR adjusted for education)	Lung cancer || id:ieu-a-966	rWtAcu	ieu-a-966	27209	rs72828890	0.858916	1.59521	0.590277
1188	Television watching (MVMR adjusted for education)	Lung cancer || id:ieu-a-966	rWtAcu	ieu-a-966	27209	rs72834698	2.33095	1.10548	0.0349841
1189	Television watching (MVMR adjusted for education)	Lung cancer || id:ieu-a-966	rWtAcu	ieu-a-966	27209	rs74802478	2.12925	1.37624	0.121825
1190	Television watching (MVMR adjusted for education)	Lung cancer || id:ieu-a-966	rWtAcu	ieu-a-966	27209	rs749671	1.86918	1.1255	0.0967635
1191	Television watching (MVMR adjusted for education)	Lung cancer || id:ieu-a-966	rWtAcu	ieu-a-966	27209	rs7564130	1.79054	1.2462	0.150775
1192	Television watching (MVMR adjusted for education)	Lung cancer || id:ieu-a-966	rWtAcu	ieu-a-966	27209	rs7693703	-1.32318	1.33626	0.32207
1193	Television watching (MVMR adjusted for education)	Lung cancer || id:ieu-a-966	rWtAcu	ieu-a-966	27209	rs7716447	3.1658	1.95523	0.105416
1194	Television watching (MVMR adjusted for education)	Lung cancer || id:ieu-a-966	rWtAcu	ieu-a-966	27209	rs7788008	-1.73852	1.41477	0.219134
1195	Television watching (MVMR adjusted for education)	Lung cancer || id:ieu-a-966	rWtAcu	ieu-a-966	27209	rs7834121	-0.467538	1.327	0.724593
1196	Television watching (MVMR adjusted for education)	Lung cancer || id:ieu-a-966	rWtAcu	ieu-a-966	27209	rs78394231	0.0018571	1.42167	0.998958
1197	Television watching (MVMR adjusted for education)	Lung cancer || id:ieu-a-966	rWtAcu	ieu-a-966	27209	rs801733	-0.5923	1.11559	0.595467
1198	Television watching (MVMR adjusted for education)	Lung cancer || id:ieu-a-966	rWtAcu	ieu-a-966	27209	rs8756	-1.00882	1.38938	0.467785
1199	Television watching (MVMR adjusted for education)	Lung cancer || id:ieu-a-966	rWtAcu	ieu-a-966	27209	rs9471333	0.533835	1.38777	0.700481
1200	Television watching (MVMR adjusted for education)	Lung cancer || id:ieu-a-966	rWtAcu	ieu-a-966	27209	rs9563168	-0.918806	1.23722	0.457702
1201	Television watching (MVMR adjusted for education)	Lung cancer || id:ieu-a-966	rWtAcu	ieu-a-966	27209	rs9569734	0.746321	1.28405	0.56109
1202	Television watching (MVMR adjusted for education)	Lung cancer || id:ieu-a-966	rWtAcu	ieu-a-966	27209	rs9834970	-1.70082	1.402	0.225076
1203	Television watching (MVMR adjusted for education)	Lung cancer || id:ieu-a-966	rWtAcu	ieu-a-966	27209	rs9867121	-0.759495	1.26932	0.549607
1204	Television watching (MVMR adjusted for education)	Lung cancer || id:ieu-a-966	rWtAcu	ieu-a-966	27209	rs9902312	-1.17433	1.28067	0.359161
1205	Television watching (MVMR adjusted for education)	Lung cancer || id:ieu-a-966	rWtAcu	ieu-a-966	27209	rs9964724	1.29029	1.08572	0.23467
1206	Television watching (MVMR adjusted for education)	Lung cancer || id:ieu-a-966	rWtAcu	ieu-a-966	27209	All - Inverse variance weighted	0.646223	0.144773	8.05638e-06
1207	Television watching (MVMR adjusted for education)	Lung cancer || id:ieu-a-966	rWtAcu	ieu-a-966	27209	All - MR Egger	0.58341	0.670591	0.38652
1208	Television watching (MVMR adjusted for education)	Squamous cell lung cancer || id:ieu-a-967	rWtAcu	ieu-a-967	18313	rs10041724	0.43576	1.89222	0.817866
1209	Television watching (MVMR adjusted for education)	Squamous cell lung cancer || id:ieu-a-967	rWtAcu	ieu-a-967	18313	rs10054327	-0.400574	1.64929	0.808101
1210	Television watching (MVMR adjusted for education)	Squamous cell lung cancer || id:ieu-a-967	rWtAcu	ieu-a-967	18313	rs10189857	1.28904	1.4201	0.364031
1211	Television watching (MVMR adjusted for education)	Squamous cell lung cancer || id:ieu-a-967	rWtAcu	ieu-a-967	18313	rs1031423	-0.345182	1.88579	0.854764
1212	Television watching (MVMR adjusted for education)	Squamous cell lung cancer || id:ieu-a-967	rWtAcu	ieu-a-967	18313	rs10771746	-0.830164	2.14621	0.698901
1213	Television watching (MVMR adjusted for education)	Squamous cell lung cancer || id:ieu-a-967	rWtAcu	ieu-a-967	18313	rs10772643	1.41936	1.77308	0.423419
1214	Television watching (MVMR adjusted for education)	Squamous cell lung cancer || id:ieu-a-967	rWtAcu	ieu-a-967	18313	rs10876864	1.44425	2.097	0.490999
1215	Television watching (MVMR adjusted for education)	Squamous cell lung cancer || id:ieu-a-967	rWtAcu	ieu-a-967	18313	rs10932837	-2.18588	2.15138	0.309614
1216	Television watching (MVMR adjusted for education)	Squamous cell lung cancer || id:ieu-a-967	rWtAcu	ieu-a-967	18313	rs10947452	-0.401196	2.07007	0.846326
1217	Television watching (MVMR adjusted for education)	Squamous cell lung cancer || id:ieu-a-967	rWtAcu	ieu-a-967	18313	rs11130793	-0.824262	2.16785	0.703781
1218	Television watching (MVMR adjusted for education)	Squamous cell lung cancer || id:ieu-a-967	rWtAcu	ieu-a-967	18313	rs111901094	1.52746	2.59341	0.555875
1219	Television watching (MVMR adjusted for education)	Squamous cell lung cancer || id:ieu-a-967	rWtAcu	ieu-a-967	18313	rs11218575	4.51717	1.7704	0.0107261
1220	Television watching (MVMR adjusted for education)	Squamous cell lung cancer || id:ieu-a-967	rWtAcu	ieu-a-967	18313	rs11245482	2.79128	2.24438	0.213621
1221	Television watching (MVMR adjusted for education)	Squamous cell lung cancer || id:ieu-a-967	rWtAcu	ieu-a-967	18313	rs114720649	-1.2887	2.56321	0.615128
1222	Television watching (MVMR adjusted for education)	Squamous cell lung cancer || id:ieu-a-967	rWtAcu	ieu-a-967	18313	rs11689199	-2.34961	1.63017	0.149492
1223	Television watching (MVMR adjusted for education)	Squamous cell lung cancer || id:ieu-a-967	rWtAcu	ieu-a-967	18313	rs11714337	-0.0639	1.99593	0.97446
1224	Television watching (MVMR adjusted for education)	Squamous cell lung cancer || id:ieu-a-967	rWtAcu	ieu-a-967	18313	rs11917871	-0.422479	1.694	0.803053
1225	Television watching (MVMR adjusted for education)	Squamous cell lung cancer || id:ieu-a-967	rWtAcu	ieu-a-967	18313	rs12105701	2.93115	2.09592	0.161963
1226	Television watching (MVMR adjusted for education)	Squamous cell lung cancer || id:ieu-a-967	rWtAcu	ieu-a-967	18313	rs12342024	-0.15702	1.97148	0.936519
1227	Television watching (MVMR adjusted for education)	Squamous cell lung cancer || id:ieu-a-967	rWtAcu	ieu-a-967	18313	rs1243182	0.545011	1.53953	0.72333
1228	Television watching (MVMR adjusted for education)	Squamous cell lung cancer || id:ieu-a-967	rWtAcu	ieu-a-967	18313	rs12491503	-3.25304	1.97843	0.100124
1229	Television watching (MVMR adjusted for education)	Squamous cell lung cancer || id:ieu-a-967	rWtAcu	ieu-a-967	18313	rs12554512	0.505914	1.37605	0.713129
1230	Television watching (MVMR adjusted for education)	Squamous cell lung cancer || id:ieu-a-967	rWtAcu	ieu-a-967	18313	rs13107325	0.484921	1.82679	0.790663
1231	Television watching (MVMR adjusted for education)	Squamous cell lung cancer || id:ieu-a-967	rWtAcu	ieu-a-967	18313	rs1451533	0.295364	1.96325	0.880412
1232	Television watching (MVMR adjusted for education)	Squamous cell lung cancer || id:ieu-a-967	rWtAcu	ieu-a-967	18313	rs148544378	-0.388611	2.51983	0.877435
1233	Television watching (MVMR adjusted for education)	Squamous cell lung cancer || id:ieu-a-967	rWtAcu	ieu-a-967	18313	rs148648822	1.40075	2.30822	0.543949
1234	Television watching (MVMR adjusted for education)	Squamous cell lung cancer || id:ieu-a-967	rWtAcu	ieu-a-967	18313	rs17207890	3.55827	1.73463	0.0402359
1235	Television watching (MVMR adjusted for education)	Squamous cell lung cancer || id:ieu-a-967	rWtAcu	ieu-a-967	18313	rs17727474	2.71727	1.87994	0.148345
1236	Television watching (MVMR adjusted for education)	Squamous cell lung cancer || id:ieu-a-967	rWtAcu	ieu-a-967	18313	rs182355396	1.13357	1.77392	0.52281
1237	Television watching (MVMR adjusted for education)	Squamous cell lung cancer || id:ieu-a-967	rWtAcu	ieu-a-967	18313	rs1913808	1.19966	1.92947	0.534101
1238	Television watching (MVMR adjusted for education)	Squamous cell lung cancer || id:ieu-a-967	rWtAcu	ieu-a-967	18313	rs2034768	0.8697	1.86073	0.640216
1239	Television watching (MVMR adjusted for education)	Squamous cell lung cancer || id:ieu-a-967	rWtAcu	ieu-a-967	18313	rs2045147	2.67732	2.19285	0.222111
1240	Television watching (MVMR adjusted for education)	Squamous cell lung cancer || id:ieu-a-967	rWtAcu	ieu-a-967	18313	rs2073869	-1.53646	1.83953	0.403579
1241	Television watching (MVMR adjusted for education)	Squamous cell lung cancer || id:ieu-a-967	rWtAcu	ieu-a-967	18313	rs2173650	2.15071	2.16233	0.319919
1242	Television watching (MVMR adjusted for education)	Squamous cell lung cancer || id:ieu-a-967	rWtAcu	ieu-a-967	18313	rs2184364	1.16135	2.02588	0.56647
1243	Television watching (MVMR adjusted for education)	Squamous cell lung cancer || id:ieu-a-967	rWtAcu	ieu-a-967	18313	rs2291681	0.198641	2.12462	0.92551
1244	Television watching (MVMR adjusted for education)	Squamous cell lung cancer || id:ieu-a-967	rWtAcu	ieu-a-967	18313	rs2447098	3.10583	1.7716	0.0795808
1245	Television watching (MVMR adjusted for education)	Squamous cell lung cancer || id:ieu-a-967	rWtAcu	ieu-a-967	18313	rs2460	-1.11385	2.11107	0.597759
1246	Television watching (MVMR adjusted for education)	Squamous cell lung cancer || id:ieu-a-967	rWtAcu	ieu-a-967	18313	rs2584597	0.222839	2.1024	0.915588
1247	Television watching (MVMR adjusted for education)	Squamous cell lung cancer || id:ieu-a-967	rWtAcu	ieu-a-967	18313	rs2616830	0.0821956	1.71562	0.961788
1248	Television watching (MVMR adjusted for education)	Squamous cell lung cancer || id:ieu-a-967	rWtAcu	ieu-a-967	18313	rs262890	4.20926	1.69168	0.012839
1249	Television watching (MVMR adjusted for education)	Squamous cell lung cancer || id:ieu-a-967	rWtAcu	ieu-a-967	18313	rs263771	2.64791	2.05747	0.198103
1250	Television watching (MVMR adjusted for education)	Squamous cell lung cancer || id:ieu-a-967	rWtAcu	ieu-a-967	18313	rs2971640	4.42081	2.22185	0.046624
1251	Television watching (MVMR adjusted for education)	Squamous cell lung cancer || id:ieu-a-967	rWtAcu	ieu-a-967	18313	rs303753	3.77429	2.17714	0.0829898
1252	Television watching (MVMR adjusted for education)	Squamous cell lung cancer || id:ieu-a-967	rWtAcu	ieu-a-967	18313	rs34811474	4.36325	2.64233	0.0986798
1253	Television watching (MVMR adjusted for education)	Squamous cell lung cancer || id:ieu-a-967	rWtAcu	ieu-a-967	18313	rs34864022	1.1548	2.19073	0.598105
1254	Television watching (MVMR adjusted for education)	Squamous cell lung cancer || id:ieu-a-967	rWtAcu	ieu-a-967	18313	rs374722	0.997138	1.61142	0.536051
1255	Television watching (MVMR adjusted for education)	Squamous cell lung cancer || id:ieu-a-967	rWtAcu	ieu-a-967	18313	rs3754970	2.39435	1.76213	0.174216
1256	Television watching (MVMR adjusted for education)	Squamous cell lung cancer || id:ieu-a-967	rWtAcu	ieu-a-967	18313	rs3796386	-0.170918	1.06273	0.872228
1257	Television watching (MVMR adjusted for education)	Squamous cell lung cancer || id:ieu-a-967	rWtAcu	ieu-a-967	18313	rs4382592	6.21371	2.28807	0.00661359
1258	Television watching (MVMR adjusted for education)	Squamous cell lung cancer || id:ieu-a-967	rWtAcu	ieu-a-967	18313	rs4577309	5.22478	1.85769	0.00491556
1259	Television watching (MVMR adjusted for education)	Squamous cell lung cancer || id:ieu-a-967	rWtAcu	ieu-a-967	18313	rs4845364	0.782307	1.8048	0.664681
1260	Television watching (MVMR adjusted for education)	Squamous cell lung cancer || id:ieu-a-967	rWtAcu	ieu-a-967	18313	rs4973576	0.70316	2.02707	0.728677
1261	Television watching (MVMR adjusted for education)	Squamous cell lung cancer || id:ieu-a-967	rWtAcu	ieu-a-967	18313	rs553397860	-2.02356	2.29824	0.378597
1262	Television watching (MVMR adjusted for education)	Squamous cell lung cancer || id:ieu-a-967	rWtAcu	ieu-a-967	18313	rs56103247	1.48722	2.29503	0.516973
1263	Television watching (MVMR adjusted for education)	Squamous cell lung cancer || id:ieu-a-967	rWtAcu	ieu-a-967	18313	rs56398417	-3.31651	2.30886	0.15088
1264	Television watching (MVMR adjusted for education)	Squamous cell lung cancer || id:ieu-a-967	rWtAcu	ieu-a-967	18313	rs56858768	-0.957987	1.97093	0.626926
1265	Television watching (MVMR adjusted for education)	Squamous cell lung cancer || id:ieu-a-967	rWtAcu	ieu-a-967	18313	rs57585211	0.497304	2.20071	0.821221
1266	Television watching (MVMR adjusted for education)	Squamous cell lung cancer || id:ieu-a-967	rWtAcu	ieu-a-967	18313	rs6131281	-3.26134	1.82787	0.0743868
1267	Television watching (MVMR adjusted for education)	Squamous cell lung cancer || id:ieu-a-967	rWtAcu	ieu-a-967	18313	rs6141814	0.836514	2.03443	0.680941
1268	Television watching (MVMR adjusted for education)	Squamous cell lung cancer || id:ieu-a-967	rWtAcu	ieu-a-967	18313	rs62332760	-1.95956	1.97521	0.32116
1269	Television watching (MVMR adjusted for education)	Squamous cell lung cancer || id:ieu-a-967	rWtAcu	ieu-a-967	18313	rs62379379	3.82018	2.20115	0.0826457
1270	Television watching (MVMR adjusted for education)	Squamous cell lung cancer || id:ieu-a-967	rWtAcu	ieu-a-967	18313	rs62641636	2.73239	2.1535	0.204508
1271	Television watching (MVMR adjusted for education)	Squamous cell lung cancer || id:ieu-a-967	rWtAcu	ieu-a-967	18313	rs6472942	1.13853	2.16015	0.598152
1272	Television watching (MVMR adjusted for education)	Squamous cell lung cancer || id:ieu-a-967	rWtAcu	ieu-a-967	18313	rs648044	0.355598	2.21807	0.87263
1273	Television watching (MVMR adjusted for education)	Squamous cell lung cancer || id:ieu-a-967	rWtAcu	ieu-a-967	18313	rs6673341	1.87945	1.77153	0.288728
1274	Television watching (MVMR adjusted for education)	Squamous cell lung cancer || id:ieu-a-967	rWtAcu	ieu-a-967	18313	rs66852340	0.06585	1.83878	0.971432
1275	Television watching (MVMR adjusted for education)	Squamous cell lung cancer || id:ieu-a-967	rWtAcu	ieu-a-967	18313	rs6721975	3.47095	1.96424	0.077216
1276	Television watching (MVMR adjusted for education)	Squamous cell lung cancer || id:ieu-a-967	rWtAcu	ieu-a-967	18313	rs6797840	-1.34076	1.74919	0.443375
1277	Television watching (MVMR adjusted for education)	Squamous cell lung cancer || id:ieu-a-967	rWtAcu	ieu-a-967	18313	rs6825241	-1.2237	1.56982	0.435677
1278	Television watching (MVMR adjusted for education)	Squamous cell lung cancer || id:ieu-a-967	rWtAcu	ieu-a-967	18313	rs6850494	1.01046	2.065	0.624609
1279	Television watching (MVMR adjusted for education)	Squamous cell lung cancer || id:ieu-a-967	rWtAcu	ieu-a-967	18313	rs6905544	0.0907095	1.49426	0.951594
1280	Television watching (MVMR adjusted for education)	Squamous cell lung cancer || id:ieu-a-967	rWtAcu	ieu-a-967	18313	rs7184800	-0.809753	1.78447	0.649989
1281	Television watching (MVMR adjusted for education)	Squamous cell lung cancer || id:ieu-a-967	rWtAcu	ieu-a-967	18313	rs7189927	3.79661	2.03513	0.0621064
1282	Television watching (MVMR adjusted for education)	Squamous cell lung cancer || id:ieu-a-967	rWtAcu	ieu-a-967	18313	rs7248205	1.84121	2.16986	0.396138
1283	Television watching (MVMR adjusted for education)	Squamous cell lung cancer || id:ieu-a-967	rWtAcu	ieu-a-967	18313	rs72725224	-2.55139	2.05196	0.213723
1284	Television watching (MVMR adjusted for education)	Squamous cell lung cancer || id:ieu-a-967	rWtAcu	ieu-a-967	18313	rs72781699	-1.27522	1.79479	0.477386
1285	Television watching (MVMR adjusted for education)	Squamous cell lung cancer || id:ieu-a-967	rWtAcu	ieu-a-967	18313	rs72828890	-1.22171	2.549	0.631732
1286	Television watching (MVMR adjusted for education)	Squamous cell lung cancer || id:ieu-a-967	rWtAcu	ieu-a-967	18313	rs72834698	3.07057	1.66291	0.0648196
1287	Television watching (MVMR adjusted for education)	Squamous cell lung cancer || id:ieu-a-967	rWtAcu	ieu-a-967	18313	rs74802478	4.01502	2.06918	0.0523318
1288	Television watching (MVMR adjusted for education)	Squamous cell lung cancer || id:ieu-a-967	rWtAcu	ieu-a-967	18313	rs749671	3.96077	1.67394	0.0179747
1289	Television watching (MVMR adjusted for education)	Squamous cell lung cancer || id:ieu-a-967	rWtAcu	ieu-a-967	18313	rs7564130	3.01957	1.94493	0.120535
1290	Television watching (MVMR adjusted for education)	Squamous cell lung cancer || id:ieu-a-967	rWtAcu	ieu-a-967	18313	rs7693703	-2.1129	2.076	0.308784
1291	Television watching (MVMR adjusted for education)	Squamous cell lung cancer || id:ieu-a-967	rWtAcu	ieu-a-967	18313	rs7716447	3.9369	3.05069	0.196879
1292	Television watching (MVMR adjusted for education)	Squamous cell lung cancer || id:ieu-a-967	rWtAcu	ieu-a-967	18313	rs7788008	-1.69089	2.17146	0.436163
1293	Television watching (MVMR adjusted for education)	Squamous cell lung cancer || id:ieu-a-967	rWtAcu	ieu-a-967	18313	rs7834121	-2.6443	2.09586	0.207064
1294	Television watching (MVMR adjusted for education)	Squamous cell lung cancer || id:ieu-a-967	rWtAcu	ieu-a-967	18313	rs78394231	1.28614	2.20671	0.560007
1295	Television watching (MVMR adjusted for education)	Squamous cell lung cancer || id:ieu-a-967	rWtAcu	ieu-a-967	18313	rs801733	0.732306	1.66853	0.660739
1296	Television watching (MVMR adjusted for education)	Squamous cell lung cancer || id:ieu-a-967	rWtAcu	ieu-a-967	18313	rs8756	-0.653982	2.11608	0.757281
1297	Television watching (MVMR adjusted for education)	Squamous cell lung cancer || id:ieu-a-967	rWtAcu	ieu-a-967	18313	rs9471333	0.358931	2.11531	0.86526
1298	Television watching (MVMR adjusted for education)	Squamous cell lung cancer || id:ieu-a-967	rWtAcu	ieu-a-967	18313	rs9563168	-2.37021	1.94444	0.222857
1299	Television watching (MVMR adjusted for education)	Squamous cell lung cancer || id:ieu-a-967	rWtAcu	ieu-a-967	18313	rs9569734	-2.07417	2.05447	0.312694
1300	Television watching (MVMR adjusted for education)	Squamous cell lung cancer || id:ieu-a-967	rWtAcu	ieu-a-967	18313	rs9834970	-0.490204	2.10485	0.815845
1301	Television watching (MVMR adjusted for education)	Squamous cell lung cancer || id:ieu-a-967	rWtAcu	ieu-a-967	18313	rs9867121	-0.895084	1.95837	0.647631
1302	Television watching (MVMR adjusted for education)	Squamous cell lung cancer || id:ieu-a-967	rWtAcu	ieu-a-967	18313	rs9902312	-2.30554	1.99127	0.246935
1303	Television watching (MVMR adjusted for education)	Squamous cell lung cancer || id:ieu-a-967	rWtAcu	ieu-a-967	18313	rs9964724	1.80239	1.67422	0.28168
1304	Television watching (MVMR adjusted for education)	Squamous cell lung cancer || id:ieu-a-967	rWtAcu	ieu-a-967	18313	All - Inverse variance weighted	0.691693	0.209252	0.000947904
1305	Television watching (MVMR adjusted for education)	Squamous cell lung cancer || id:ieu-a-967	rWtAcu	ieu-a-967	18313	All - MR Egger	0.0473922	0.962947	0.960852
1306	Computer use (overall)	Lung adenocarcinoma || id:ieu-a-965	ke4oc1	ieu-a-965	18336	rs10208088	0.24277	2.12	0.90883
1307	Computer use (overall)	Lung adenocarcinoma || id:ieu-a-965	ke4oc1	ieu-a-965	18336	rs113851275	3.91837	2.44781	0.109429
1308	Computer use (overall)	Lung adenocarcinoma || id:ieu-a-965	ke4oc1	ieu-a-965	18336	rs11708955	-3.66906	1.77038	0.0382213
1309	Computer use (overall)	Lung adenocarcinoma || id:ieu-a-965	ke4oc1	ieu-a-965	18336	rs11749912	-0.267787	1.95729	0.891177
1310	Computer use (overall)	Lung adenocarcinoma || id:ieu-a-965	ke4oc1	ieu-a-965	18336	rs13262595	-0.426107	1.73844	0.806372
1311	Computer use (overall)	Lung adenocarcinoma || id:ieu-a-965	ke4oc1	ieu-a-965	18336	rs1448355	-1.96975	1.973	0.318109
1312	Computer use (overall)	Lung adenocarcinoma || id:ieu-a-965	ke4oc1	ieu-a-965	18336	rs166835	0.0236118	2.11023	0.991073
1313	Computer use (overall)	Lung adenocarcinoma || id:ieu-a-965	ke4oc1	ieu-a-965	18336	rs17789218	1.14969	2.20147	0.601503
1314	Computer use (overall)	Lung adenocarcinoma || id:ieu-a-965	ke4oc1	ieu-a-965	18336	rs2068625	1.25361	1.82981	0.493278
1315	Computer use (overall)	Lung adenocarcinoma || id:ieu-a-965	ke4oc1	ieu-a-965	18336	rs206965	1.48234	2.13338	0.487159
1316	Computer use (overall)	Lung adenocarcinoma || id:ieu-a-965	ke4oc1	ieu-a-965	18336	rs2345941	0.506385	1.8242	0.781325
1317	Computer use (overall)	Lung adenocarcinoma || id:ieu-a-965	ke4oc1	ieu-a-965	18336	rs2734849	-3.5846	2.04921	0.0802468
1318	Computer use (overall)	Lung adenocarcinoma || id:ieu-a-965	ke4oc1	ieu-a-965	18336	rs2748985	-0.310277	1.9608	0.874268
1319	Computer use (overall)	Lung adenocarcinoma || id:ieu-a-965	ke4oc1	ieu-a-965	18336	rs35933007	-1.48522	2.49987	0.552432
1320	Computer use (overall)	Lung adenocarcinoma || id:ieu-a-965	ke4oc1	ieu-a-965	18336	rs4073003	-0.92774	2.11425	0.660804
1321	Computer use (overall)	Lung adenocarcinoma || id:ieu-a-965	ke4oc1	ieu-a-965	18336	rs4977839	0.590995	1.4739	0.68844
1322	Computer use (overall)	Lung adenocarcinoma || id:ieu-a-965	ke4oc1	ieu-a-965	18336	rs55772938	-0.747713	1.97013	0.704299
1323	Computer use (overall)	Lung adenocarcinoma || id:ieu-a-965	ke4oc1	ieu-a-965	18336	rs6744254	2.20805	1.64187	0.178679
1324	Computer use (overall)	Lung adenocarcinoma || id:ieu-a-965	ke4oc1	ieu-a-965	18336	rs6774533	-2.53987	2.03893	0.21288
1325	Computer use (overall)	Lung adenocarcinoma || id:ieu-a-965	ke4oc1	ieu-a-965	18336	rs73578186	0.275435	1.8998	0.884726
1326	Computer use (overall)	Lung adenocarcinoma || id:ieu-a-965	ke4oc1	ieu-a-965	18336	rs9372625	1.18798	1.64833	0.471083
1327	Computer use (overall)	Lung adenocarcinoma || id:ieu-a-965	ke4oc1	ieu-a-965	18336	rs984409	0.0445575	2.03721	0.98255
1328	Computer use (overall)	Lung adenocarcinoma || id:ieu-a-965	ke4oc1	ieu-a-965	18336	All - Inverse variance weighted	-0.1105	0.411535	0.788308
1329	Computer use (overall)	Lung adenocarcinoma || id:ieu-a-965	ke4oc1	ieu-a-965	18336	All - MR Egger	4.58653	3.49546	0.204334
1330	Computer use (overall)	Lung cancer || id:ieu-a-966	ke4oc1	ieu-a-966	27209	rs10208088	-0.0667982	1.38285	0.961473
1331	Computer use (overall)	Lung cancer || id:ieu-a-966	ke4oc1	ieu-a-966	27209	rs113851275	1.90042	1.51443	0.209523
1332	Computer use (overall)	Lung cancer || id:ieu-a-966	ke4oc1	ieu-a-966	27209	rs11708955	-3.70838	1.14775	0.0012336
1333	Computer use (overall)	Lung cancer || id:ieu-a-966	ke4oc1	ieu-a-966	27209	rs11749912	0.319499	1.28864	0.804185
1334	Computer use (overall)	Lung cancer || id:ieu-a-966	ke4oc1	ieu-a-966	27209	rs13262595	-1.60807	1.15075	0.162291
1335	Computer use (overall)	Lung cancer || id:ieu-a-966	ke4oc1	ieu-a-966	27209	rs1448355	-0.719107	1.26227	0.568885
1336	Computer use (overall)	Lung cancer || id:ieu-a-966	ke4oc1	ieu-a-966	27209	rs166835	-1.3594	1.35669	0.316346
1337	Computer use (overall)	Lung cancer || id:ieu-a-966	ke4oc1	ieu-a-966	27209	rs17789218	-0.760993	1.4096	0.58929
1338	Computer use (overall)	Lung cancer || id:ieu-a-966	ke4oc1	ieu-a-966	27209	rs2068625	0.343191	1.21538	0.777657
1339	Computer use (overall)	Lung cancer || id:ieu-a-966	ke4oc1	ieu-a-966	27209	rs206965	-0.0614051	1.37431	0.964362
1340	Computer use (overall)	Lung cancer || id:ieu-a-966	ke4oc1	ieu-a-966	27209	rs2345941	0.274498	1.18887	0.8174
1341	Computer use (overall)	Lung cancer || id:ieu-a-966	ke4oc1	ieu-a-966	27209	rs2734849	-2.1318	1.30443	0.1022
1342	Computer use (overall)	Lung cancer || id:ieu-a-966	ke4oc1	ieu-a-966	27209	rs2748985	-0.0848793	1.26827	0.946641
1343	Computer use (overall)	Lung cancer || id:ieu-a-966	ke4oc1	ieu-a-966	27209	rs35933007	-1.02159	1.651	0.536069
1344	Computer use (overall)	Lung cancer || id:ieu-a-966	ke4oc1	ieu-a-966	27209	rs4073003	-0.0206458	1.35555	0.987848
1345	Computer use (overall)	Lung cancer || id:ieu-a-966	ke4oc1	ieu-a-966	27209	rs4977839	-0.275558	0.9432	0.77017
1346	Computer use (overall)	Lung cancer || id:ieu-a-966	ke4oc1	ieu-a-966	27209	rs55772938	0.799127	1.30993	0.541828
1347	Computer use (overall)	Lung cancer || id:ieu-a-966	ke4oc1	ieu-a-966	27209	rs6744254	0.800037	1.09706	0.465846
1348	Computer use (overall)	Lung cancer || id:ieu-a-966	ke4oc1	ieu-a-966	27209	rs6774533	-0.0777547	1.28427	0.951722
1349	Computer use (overall)	Lung cancer || id:ieu-a-966	ke4oc1	ieu-a-966	27209	rs73578186	1.68587	1.20907	0.163209
1350	Computer use (overall)	Lung cancer || id:ieu-a-966	ke4oc1	ieu-a-966	27209	rs9372625	1.35848	1.08022	0.20854
1351	Computer use (overall)	Lung cancer || id:ieu-a-966	ke4oc1	ieu-a-966	27209	rs984409	-0.094205	1.33007	0.943535
1352	Computer use (overall)	Lung cancer || id:ieu-a-966	ke4oc1	ieu-a-966	27209	All - Inverse variance weighted	-0.204931	0.278007	0.461036
1353	Computer use (overall)	Lung cancer || id:ieu-a-966	ke4oc1	ieu-a-966	27209	All - MR Egger	2.26921	2.32589	0.340901
1354	Computer use (overall)	Squamous cell lung cancer || id:ieu-a-967	ke4oc1	ieu-a-967	18313	rs10208088	3.02438	2.19985	0.169189
1355	Computer use (overall)	Squamous cell lung cancer || id:ieu-a-967	ke4oc1	ieu-a-967	18313	rs113851275	-0.426571	2.21614	0.847363
1356	Computer use (overall)	Squamous cell lung cancer || id:ieu-a-967	ke4oc1	ieu-a-967	18313	rs11708955	-3.32984	1.76806	0.0596562
1357	Computer use (overall)	Squamous cell lung cancer || id:ieu-a-967	ke4oc1	ieu-a-967	18313	rs11749912	-0.479031	1.95757	0.806683
1358	Computer use (overall)	Squamous cell lung cancer || id:ieu-a-967	ke4oc1	ieu-a-967	18313	rs13262595	-0.650419	1.74131	0.70876
1359	Computer use (overall)	Squamous cell lung cancer || id:ieu-a-967	ke4oc1	ieu-a-967	18313	rs1448355	0.70754	1.90727	0.710659
1360	Computer use (overall)	Squamous cell lung cancer || id:ieu-a-967	ke4oc1	ieu-a-967	18313	rs166835	-3.94418	2.00923	0.0496429
1361	Computer use (overall)	Squamous cell lung cancer || id:ieu-a-967	ke4oc1	ieu-a-967	18313	rs17789218	-0.867827	2.17667	0.690118
1362	Computer use (overall)	Squamous cell lung cancer || id:ieu-a-967	ke4oc1	ieu-a-967	18313	rs2068625	0.509131	1.85137	0.783315
1363	Computer use (overall)	Squamous cell lung cancer || id:ieu-a-967	ke4oc1	ieu-a-967	18313	rs206965	0.840325	2.14381	0.695075
1364	Computer use (overall)	Squamous cell lung cancer || id:ieu-a-967	ke4oc1	ieu-a-967	18313	rs2345941	1.12524	1.78993	0.529579
1365	Computer use (overall)	Squamous cell lung cancer || id:ieu-a-967	ke4oc1	ieu-a-967	18313	rs2734849	-3.69111	2.05093	0.0719041
1366	Computer use (overall)	Squamous cell lung cancer || id:ieu-a-967	ke4oc1	ieu-a-967	18313	rs2748985	0.0076004	1.9614	0.996908
1367	Computer use (overall)	Squamous cell lung cancer || id:ieu-a-967	ke4oc1	ieu-a-967	18313	rs35933007	-3.15342	2.46873	0.201481
1368	Computer use (overall)	Squamous cell lung cancer || id:ieu-a-967	ke4oc1	ieu-a-967	18313	rs4073003	2.58725	1.9798	0.191273
1369	Computer use (overall)	Squamous cell lung cancer || id:ieu-a-967	ke4oc1	ieu-a-967	18313	rs4977839	-0.438719	1.44755	0.761831
1370	Computer use (overall)	Squamous cell lung cancer || id:ieu-a-967	ke4oc1	ieu-a-967	18313	rs55772938	1.31076	2.0258	0.51761
1371	Computer use (overall)	Squamous cell lung cancer || id:ieu-a-967	ke4oc1	ieu-a-967	18313	rs6744254	-0.474321	1.71044	0.781542
1372	Computer use (overall)	Squamous cell lung cancer || id:ieu-a-967	ke4oc1	ieu-a-967	18313	rs6774533	1.95691	1.89753	0.302405
1373	Computer use (overall)	Squamous cell lung cancer || id:ieu-a-967	ke4oc1	ieu-a-967	18313	rs73578186	3.71227	1.7884	0.0379173
1374	Computer use (overall)	Squamous cell lung cancer || id:ieu-a-967	ke4oc1	ieu-a-967	18313	rs9372625	0.732922	1.65122	0.657139
1375	Computer use (overall)	Squamous cell lung cancer || id:ieu-a-967	ke4oc1	ieu-a-967	18313	rs984409	0.898893	2.05921	0.662458
1376	Computer use (overall)	Squamous cell lung cancer || id:ieu-a-967	ke4oc1	ieu-a-967	18313	All - Inverse variance weighted	0.0413828	0.428874	0.92313
1377	Computer use (overall)	Squamous cell lung cancer || id:ieu-a-967	ke4oc1	ieu-a-967	18313	All - MR Egger	1.96811	3.63647	0.594338
1378	Computer use (excluded pleiotropic SNPs)	Lung adenocarcinoma || id:ieu-a-965	1vmbuo	ieu-a-965	18336	rs10208088	0.24277	2.12	0.90883
1379	Computer use (excluded pleiotropic SNPs)	Lung adenocarcinoma || id:ieu-a-965	1vmbuo	ieu-a-965	18336	rs113851275	3.91837	2.44781	0.109429
1380	Computer use (excluded pleiotropic SNPs)	Lung adenocarcinoma || id:ieu-a-965	1vmbuo	ieu-a-965	18336	rs11749912	-0.267787	1.95729	0.891177
1381	Computer use (excluded pleiotropic SNPs)	Lung adenocarcinoma || id:ieu-a-965	1vmbuo	ieu-a-965	18336	rs166835	0.0236118	2.11023	0.991073
1382	Computer use (excluded pleiotropic SNPs)	Lung adenocarcinoma || id:ieu-a-965	1vmbuo	ieu-a-965	18336	rs17789218	1.14969	2.20147	0.601503
1383	Computer use (excluded pleiotropic SNPs)	Lung adenocarcinoma || id:ieu-a-965	1vmbuo	ieu-a-965	18336	rs2068625	1.25361	1.82981	0.493278
1384	Computer use (excluded pleiotropic SNPs)	Lung adenocarcinoma || id:ieu-a-965	1vmbuo	ieu-a-965	18336	rs206965	1.48234	2.13338	0.487159
1385	Computer use (excluded pleiotropic SNPs)	Lung adenocarcinoma || id:ieu-a-965	1vmbuo	ieu-a-965	18336	rs2345941	0.506385	1.8242	0.781325
1386	Computer use (excluded pleiotropic SNPs)	Lung adenocarcinoma || id:ieu-a-965	1vmbuo	ieu-a-965	18336	rs2734849	-3.5846	2.04921	0.0802468
1387	Computer use (excluded pleiotropic SNPs)	Lung adenocarcinoma || id:ieu-a-965	1vmbuo	ieu-a-965	18336	rs2748985	-0.310277	1.9608	0.874268
1388	Computer use (excluded pleiotropic SNPs)	Lung adenocarcinoma || id:ieu-a-965	1vmbuo	ieu-a-965	18336	rs35933007	-1.48522	2.49987	0.552432
1389	Computer use (excluded pleiotropic SNPs)	Lung adenocarcinoma || id:ieu-a-965	1vmbuo	ieu-a-965	18336	rs4073003	-0.92774	2.11425	0.660804
1390	Computer use (excluded pleiotropic SNPs)	Lung adenocarcinoma || id:ieu-a-965	1vmbuo	ieu-a-965	18336	rs4977839	0.590995	1.4739	0.68844
1391	Computer use (excluded pleiotropic SNPs)	Lung adenocarcinoma || id:ieu-a-965	1vmbuo	ieu-a-965	18336	rs55772938	-0.747713	1.97013	0.704299
1392	Computer use (excluded pleiotropic SNPs)	Lung adenocarcinoma || id:ieu-a-965	1vmbuo	ieu-a-965	18336	rs6744254	2.20805	1.64187	0.178679
1393	Computer use (excluded pleiotropic SNPs)	Lung adenocarcinoma || id:ieu-a-965	1vmbuo	ieu-a-965	18336	rs6774533	-2.53987	2.03893	0.21288
1394	Computer use (excluded pleiotropic SNPs)	Lung adenocarcinoma || id:ieu-a-965	1vmbuo	ieu-a-965	18336	rs73578186	0.275435	1.8998	0.884726
1395	Computer use (excluded pleiotropic SNPs)	Lung adenocarcinoma || id:ieu-a-965	1vmbuo	ieu-a-965	18336	rs9372625	1.18798	1.64833	0.471083
1396	Computer use (excluded pleiotropic SNPs)	Lung adenocarcinoma || id:ieu-a-965	1vmbuo	ieu-a-965	18336	rs984409	0.0445575	2.03721	0.98255
1397	Computer use (excluded pleiotropic SNPs)	Lung adenocarcinoma || id:ieu-a-965	1vmbuo	ieu-a-965	18336	All - Inverse variance weighted	0.233144	0.447316	0.602222
1398	Computer use (excluded pleiotropic SNPs)	Lung adenocarcinoma || id:ieu-a-965	1vmbuo	ieu-a-965	18336	All - MR Egger	5.02707	3.51743	0.171068
1399	Computer use (excluded pleiotropic SNPs)	Lung cancer || id:ieu-a-966	1vmbuo	ieu-a-966	27209	rs10208088	-0.0667982	1.38285	0.961473
1400	Computer use (excluded pleiotropic SNPs)	Lung cancer || id:ieu-a-966	1vmbuo	ieu-a-966	27209	rs113851275	1.90042	1.51443	0.209523
1401	Computer use (excluded pleiotropic SNPs)	Lung cancer || id:ieu-a-966	1vmbuo	ieu-a-966	27209	rs11749912	0.319499	1.28864	0.804185
1402	Computer use (excluded pleiotropic SNPs)	Lung cancer || id:ieu-a-966	1vmbuo	ieu-a-966	27209	rs166835	-1.3594	1.35669	0.316346
1403	Computer use (excluded pleiotropic SNPs)	Lung cancer || id:ieu-a-966	1vmbuo	ieu-a-966	27209	rs17789218	-0.760993	1.4096	0.58929
1404	Computer use (excluded pleiotropic SNPs)	Lung cancer || id:ieu-a-966	1vmbuo	ieu-a-966	27209	rs2068625	0.343191	1.21538	0.777657
1405	Computer use (excluded pleiotropic SNPs)	Lung cancer || id:ieu-a-966	1vmbuo	ieu-a-966	27209	rs206965	-0.0614051	1.37431	0.964362
1406	Computer use (excluded pleiotropic SNPs)	Lung cancer || id:ieu-a-966	1vmbuo	ieu-a-966	27209	rs2345941	0.274498	1.18887	0.8174
1407	Computer use (excluded pleiotropic SNPs)	Lung cancer || id:ieu-a-966	1vmbuo	ieu-a-966	27209	rs2734849	-2.1318	1.30443	0.1022
1408	Computer use (excluded pleiotropic SNPs)	Lung cancer || id:ieu-a-966	1vmbuo	ieu-a-966	27209	rs2748985	-0.0848793	1.26827	0.946641
1409	Computer use (excluded pleiotropic SNPs)	Lung cancer || id:ieu-a-966	1vmbuo	ieu-a-966	27209	rs35933007	-1.02159	1.651	0.536069
1410	Computer use (excluded pleiotropic SNPs)	Lung cancer || id:ieu-a-966	1vmbuo	ieu-a-966	27209	rs4073003	-0.0206458	1.35555	0.987848
1411	Computer use (excluded pleiotropic SNPs)	Lung cancer || id:ieu-a-966	1vmbuo	ieu-a-966	27209	rs4977839	-0.275558	0.9432	0.77017
1412	Computer use (excluded pleiotropic SNPs)	Lung cancer || id:ieu-a-966	1vmbuo	ieu-a-966	27209	rs55772938	0.799127	1.30993	0.541828
1413	Computer use (excluded pleiotropic SNPs)	Lung cancer || id:ieu-a-966	1vmbuo	ieu-a-966	27209	rs6744254	0.800037	1.09706	0.465846
1414	Computer use (excluded pleiotropic SNPs)	Lung cancer || id:ieu-a-966	1vmbuo	ieu-a-966	27209	rs6774533	-0.0777547	1.28427	0.951722
1415	Computer use (excluded pleiotropic SNPs)	Lung cancer || id:ieu-a-966	1vmbuo	ieu-a-966	27209	rs73578186	1.68587	1.20907	0.163209
1416	Computer use (excluded pleiotropic SNPs)	Lung cancer || id:ieu-a-966	1vmbuo	ieu-a-966	27209	rs9372625	1.35848	1.08022	0.20854
1417	Computer use (excluded pleiotropic SNPs)	Lung cancer || id:ieu-a-966	1vmbuo	ieu-a-966	27209	rs984409	-0.094205	1.33007	0.943535
1418	Computer use (excluded pleiotropic SNPs)	Lung cancer || id:ieu-a-966	1vmbuo	ieu-a-966	27209	All - Inverse variance weighted	0.134931	0.289977	0.641705
1419	Computer use (excluded pleiotropic SNPs)	Lung cancer || id:ieu-a-966	1vmbuo	ieu-a-966	27209	All - MR Egger	2.91964	2.25447	0.212617
1420	Computer use (excluded pleiotropic SNPs)	Squamous cell lung cancer || id:ieu-a-967	1vmbuo	ieu-a-967	18313	rs10208088	3.02438	2.19985	0.169189
1421	Computer use (excluded pleiotropic SNPs)	Squamous cell lung cancer || id:ieu-a-967	1vmbuo	ieu-a-967	18313	rs113851275	-0.426571	2.21614	0.847363
1422	Computer use (excluded pleiotropic SNPs)	Squamous cell lung cancer || id:ieu-a-967	1vmbuo	ieu-a-967	18313	rs11749912	-0.479031	1.95757	0.806683
1423	Computer use (excluded pleiotropic SNPs)	Squamous cell lung cancer || id:ieu-a-967	1vmbuo	ieu-a-967	18313	rs166835	-3.94418	2.00923	0.0496429
1424	Computer use (excluded pleiotropic SNPs)	Squamous cell lung cancer || id:ieu-a-967	1vmbuo	ieu-a-967	18313	rs17789218	-0.867827	2.17667	0.690118
1425	Computer use (excluded pleiotropic SNPs)	Squamous cell lung cancer || id:ieu-a-967	1vmbuo	ieu-a-967	18313	rs2068625	0.509131	1.85137	0.783315
1426	Computer use (excluded pleiotropic SNPs)	Squamous cell lung cancer || id:ieu-a-967	1vmbuo	ieu-a-967	18313	rs206965	0.840325	2.14381	0.695075
1427	Computer use (excluded pleiotropic SNPs)	Squamous cell lung cancer || id:ieu-a-967	1vmbuo	ieu-a-967	18313	rs2345941	1.12524	1.78993	0.529579
1428	Computer use (excluded pleiotropic SNPs)	Squamous cell lung cancer || id:ieu-a-967	1vmbuo	ieu-a-967	18313	rs2734849	-3.69111	2.05093	0.0719041
1429	Computer use (excluded pleiotropic SNPs)	Squamous cell lung cancer || id:ieu-a-967	1vmbuo	ieu-a-967	18313	rs2748985	0.0076004	1.9614	0.996908
1430	Computer use (excluded pleiotropic SNPs)	Squamous cell lung cancer || id:ieu-a-967	1vmbuo	ieu-a-967	18313	rs35933007	-3.15342	2.46873	0.201481
1431	Computer use (excluded pleiotropic SNPs)	Squamous cell lung cancer || id:ieu-a-967	1vmbuo	ieu-a-967	18313	rs4073003	2.58725	1.9798	0.191273
1432	Computer use (excluded pleiotropic SNPs)	Squamous cell lung cancer || id:ieu-a-967	1vmbuo	ieu-a-967	18313	rs4977839	-0.438719	1.44755	0.761831
1433	Computer use (excluded pleiotropic SNPs)	Squamous cell lung cancer || id:ieu-a-967	1vmbuo	ieu-a-967	18313	rs55772938	1.31076	2.0258	0.51761
1434	Computer use (excluded pleiotropic SNPs)	Squamous cell lung cancer || id:ieu-a-967	1vmbuo	ieu-a-967	18313	rs6744254	-0.474321	1.71044	0.781542
1435	Computer use (excluded pleiotropic SNPs)	Squamous cell lung cancer || id:ieu-a-967	1vmbuo	ieu-a-967	18313	rs6774533	1.95691	1.89753	0.302405
1436	Computer use (excluded pleiotropic SNPs)	Squamous cell lung cancer || id:ieu-a-967	1vmbuo	ieu-a-967	18313	rs73578186	3.71227	1.7884	0.0379173
1437	Computer use (excluded pleiotropic SNPs)	Squamous cell lung cancer || id:ieu-a-967	1vmbuo	ieu-a-967	18313	rs9372625	0.732922	1.65122	0.657139
1438	Computer use (excluded pleiotropic SNPs)	Squamous cell lung cancer || id:ieu-a-967	1vmbuo	ieu-a-967	18313	rs984409	0.898893	2.05921	0.662458
1439	Computer use (excluded pleiotropic SNPs)	Squamous cell lung cancer || id:ieu-a-967	1vmbuo	ieu-a-967	18313	All - Inverse variance weighted	0.260636	0.456275	0.567847
1440	Computer use (excluded pleiotropic SNPs)	Squamous cell lung cancer || id:ieu-a-967	1vmbuo	ieu-a-967	18313	All - MR Egger	2.57029	3.57735	0.482215
1441	Computer use (excluded education SNPs)	Lung adenocarcinoma || id:ieu-a-965	fQCsJ0	ieu-a-965	18336	rs10208088	0.24277	2.12	0.90883
1442	Computer use (excluded education SNPs)	Lung adenocarcinoma || id:ieu-a-965	fQCsJ0	ieu-a-965	18336	rs113851275	3.91837	2.44781	0.109429
1443	Computer use (excluded education SNPs)	Lung adenocarcinoma || id:ieu-a-965	fQCsJ0	ieu-a-965	18336	rs11749912	-0.267787	1.95729	0.891177
1444	Computer use (excluded education SNPs)	Lung adenocarcinoma || id:ieu-a-965	fQCsJ0	ieu-a-965	18336	rs13262595	-0.426107	1.73844	0.806372
1445	Computer use (excluded education SNPs)	Lung adenocarcinoma || id:ieu-a-965	fQCsJ0	ieu-a-965	18336	rs1448355	-1.96975	1.973	0.318109
1446	Computer use (excluded education SNPs)	Lung adenocarcinoma || id:ieu-a-965	fQCsJ0	ieu-a-965	18336	rs166835	0.0236118	2.11023	0.991073
1447	Computer use (excluded education SNPs)	Lung adenocarcinoma || id:ieu-a-965	fQCsJ0	ieu-a-965	18336	rs17789218	1.14969	2.20147	0.601503
1448	Computer use (excluded education SNPs)	Lung adenocarcinoma || id:ieu-a-965	fQCsJ0	ieu-a-965	18336	rs2068625	1.25361	1.82981	0.493278
1449	Computer use (excluded education SNPs)	Lung adenocarcinoma || id:ieu-a-965	fQCsJ0	ieu-a-965	18336	rs206965	1.48234	2.13338	0.487159
1450	Computer use (excluded education SNPs)	Lung adenocarcinoma || id:ieu-a-965	fQCsJ0	ieu-a-965	18336	rs2345941	0.506385	1.8242	0.781325
1451	Computer use (excluded education SNPs)	Lung adenocarcinoma || id:ieu-a-965	fQCsJ0	ieu-a-965	18336	rs2734849	-3.5846	2.04921	0.0802468
1452	Computer use (excluded education SNPs)	Lung adenocarcinoma || id:ieu-a-965	fQCsJ0	ieu-a-965	18336	rs2748985	-0.310277	1.9608	0.874268
1453	Computer use (excluded education SNPs)	Lung adenocarcinoma || id:ieu-a-965	fQCsJ0	ieu-a-965	18336	rs35933007	-1.48522	2.49987	0.552432
1454	Computer use (excluded education SNPs)	Lung adenocarcinoma || id:ieu-a-965	fQCsJ0	ieu-a-965	18336	rs4073003	-0.92774	2.11425	0.660804
1455	Computer use (excluded education SNPs)	Lung adenocarcinoma || id:ieu-a-965	fQCsJ0	ieu-a-965	18336	rs4977839	0.590995	1.4739	0.68844
1456	Computer use (excluded education SNPs)	Lung adenocarcinoma || id:ieu-a-965	fQCsJ0	ieu-a-965	18336	rs55772938	-0.747713	1.97013	0.704299
1457	Computer use (excluded education SNPs)	Lung adenocarcinoma || id:ieu-a-965	fQCsJ0	ieu-a-965	18336	rs6744254	2.20805	1.64187	0.178679
1458	Computer use (excluded education SNPs)	Lung adenocarcinoma || id:ieu-a-965	fQCsJ0	ieu-a-965	18336	rs6774533	-2.53987	2.03893	0.21288
1459	Computer use (excluded education SNPs)	Lung adenocarcinoma || id:ieu-a-965	fQCsJ0	ieu-a-965	18336	rs73578186	0.275435	1.8998	0.884726
1460	Computer use (excluded education SNPs)	Lung adenocarcinoma || id:ieu-a-965	fQCsJ0	ieu-a-965	18336	rs9372625	1.18798	1.64833	0.471083
1461	Computer use (excluded education SNPs)	Lung adenocarcinoma || id:ieu-a-965	fQCsJ0	ieu-a-965	18336	rs984409	0.0445575	2.03721	0.98255
1462	Computer use (excluded education SNPs)	Lung adenocarcinoma || id:ieu-a-965	fQCsJ0	ieu-a-965	18336	All - Inverse variance weighted	0.0927739	0.423126	0.826449
1463	Computer use (excluded education SNPs)	Lung adenocarcinoma || id:ieu-a-965	fQCsJ0	ieu-a-965	18336	All - MR Egger	5.09683	3.50371	0.162075
1464	Computer use (excluded education SNPs)	Lung cancer || id:ieu-a-966	fQCsJ0	ieu-a-966	27209	rs10208088	-0.0667982	1.38285	0.961473
1465	Computer use (excluded education SNPs)	Lung cancer || id:ieu-a-966	fQCsJ0	ieu-a-966	27209	rs113851275	1.90042	1.51443	0.209523
1466	Computer use (excluded education SNPs)	Lung cancer || id:ieu-a-966	fQCsJ0	ieu-a-966	27209	rs11749912	0.319499	1.28864	0.804185
1467	Computer use (excluded education SNPs)	Lung cancer || id:ieu-a-966	fQCsJ0	ieu-a-966	27209	rs13262595	-1.60807	1.15075	0.162291
1468	Computer use (excluded education SNPs)	Lung cancer || id:ieu-a-966	fQCsJ0	ieu-a-966	27209	rs1448355	-0.719107	1.26227	0.568885
1469	Computer use (excluded education SNPs)	Lung cancer || id:ieu-a-966	fQCsJ0	ieu-a-966	27209	rs166835	-1.3594	1.35669	0.316346
1470	Computer use (excluded education SNPs)	Lung cancer || id:ieu-a-966	fQCsJ0	ieu-a-966	27209	rs17789218	-0.760993	1.4096	0.58929
1471	Computer use (excluded education SNPs)	Lung cancer || id:ieu-a-966	fQCsJ0	ieu-a-966	27209	rs2068625	0.343191	1.21538	0.777657
1472	Computer use (excluded education SNPs)	Lung cancer || id:ieu-a-966	fQCsJ0	ieu-a-966	27209	rs206965	-0.0614051	1.37431	0.964362
1473	Computer use (excluded education SNPs)	Lung cancer || id:ieu-a-966	fQCsJ0	ieu-a-966	27209	rs2345941	0.274498	1.18887	0.8174
1474	Computer use (excluded education SNPs)	Lung cancer || id:ieu-a-966	fQCsJ0	ieu-a-966	27209	rs2734849	-2.1318	1.30443	0.1022
1475	Computer use (excluded education SNPs)	Lung cancer || id:ieu-a-966	fQCsJ0	ieu-a-966	27209	rs2748985	-0.0848793	1.26827	0.946641
1476	Computer use (excluded education SNPs)	Lung cancer || id:ieu-a-966	fQCsJ0	ieu-a-966	27209	rs35933007	-1.02159	1.651	0.536069
1477	Computer use (excluded education SNPs)	Lung cancer || id:ieu-a-966	fQCsJ0	ieu-a-966	27209	rs4073003	-0.0206458	1.35555	0.987848
1478	Computer use (excluded education SNPs)	Lung cancer || id:ieu-a-966	fQCsJ0	ieu-a-966	27209	rs4977839	-0.275558	0.9432	0.77017
1479	Computer use (excluded education SNPs)	Lung cancer || id:ieu-a-966	fQCsJ0	ieu-a-966	27209	rs55772938	0.799127	1.30993	0.541828
1480	Computer use (excluded education SNPs)	Lung cancer || id:ieu-a-966	fQCsJ0	ieu-a-966	27209	rs6744254	0.800037	1.09706	0.465846
1481	Computer use (excluded education SNPs)	Lung cancer || id:ieu-a-966	fQCsJ0	ieu-a-966	27209	rs6774533	-0.0777547	1.28427	0.951722
1482	Computer use (excluded education SNPs)	Lung cancer || id:ieu-a-966	fQCsJ0	ieu-a-966	27209	rs73578186	1.68587	1.20907	0.163209
1483	Computer use (excluded education SNPs)	Lung cancer || id:ieu-a-966	fQCsJ0	ieu-a-966	27209	rs9372625	1.35848	1.08022	0.20854
1484	Computer use (excluded education SNPs)	Lung cancer || id:ieu-a-966	fQCsJ0	ieu-a-966	27209	rs984409	-0.094205	1.33007	0.943535
1485	Computer use (excluded education SNPs)	Lung cancer || id:ieu-a-966	fQCsJ0	ieu-a-966	27209	All - Inverse variance weighted	-0.00459563	0.274459	0.986641
1486	Computer use (excluded education SNPs)	Lung cancer || id:ieu-a-966	fQCsJ0	ieu-a-966	27209	All - MR Egger	2.74655	2.2461	0.236352
1487	Computer use (excluded education SNPs)	Squamous cell lung cancer || id:ieu-a-967	fQCsJ0	ieu-a-967	18313	rs10208088	3.02438	2.19985	0.169189
1488	Computer use (excluded education SNPs)	Squamous cell lung cancer || id:ieu-a-967	fQCsJ0	ieu-a-967	18313	rs113851275	-0.426571	2.21614	0.847363
1489	Computer use (excluded education SNPs)	Squamous cell lung cancer || id:ieu-a-967	fQCsJ0	ieu-a-967	18313	rs11749912	-0.479031	1.95757	0.806683
1490	Computer use (excluded education SNPs)	Squamous cell lung cancer || id:ieu-a-967	fQCsJ0	ieu-a-967	18313	rs13262595	-0.650419	1.74131	0.70876
1491	Computer use (excluded education SNPs)	Squamous cell lung cancer || id:ieu-a-967	fQCsJ0	ieu-a-967	18313	rs1448355	0.70754	1.90727	0.710659
1492	Computer use (excluded education SNPs)	Squamous cell lung cancer || id:ieu-a-967	fQCsJ0	ieu-a-967	18313	rs166835	-3.94418	2.00923	0.0496429
1493	Computer use (excluded education SNPs)	Squamous cell lung cancer || id:ieu-a-967	fQCsJ0	ieu-a-967	18313	rs17789218	-0.867827	2.17667	0.690118
1494	Computer use (excluded education SNPs)	Squamous cell lung cancer || id:ieu-a-967	fQCsJ0	ieu-a-967	18313	rs2068625	0.509131	1.85137	0.783315
1495	Computer use (excluded education SNPs)	Squamous cell lung cancer || id:ieu-a-967	fQCsJ0	ieu-a-967	18313	rs206965	0.840325	2.14381	0.695075
1496	Computer use (excluded education SNPs)	Squamous cell lung cancer || id:ieu-a-967	fQCsJ0	ieu-a-967	18313	rs2345941	1.12524	1.78993	0.529579
1497	Computer use (excluded education SNPs)	Squamous cell lung cancer || id:ieu-a-967	fQCsJ0	ieu-a-967	18313	rs2734849	-3.69111	2.05093	0.0719041
1498	Computer use (excluded education SNPs)	Squamous cell lung cancer || id:ieu-a-967	fQCsJ0	ieu-a-967	18313	rs2748985	0.0076004	1.9614	0.996908
1499	Computer use (excluded education SNPs)	Squamous cell lung cancer || id:ieu-a-967	fQCsJ0	ieu-a-967	18313	rs35933007	-3.15342	2.46873	0.201481
1500	Computer use (excluded education SNPs)	Squamous cell lung cancer || id:ieu-a-967	fQCsJ0	ieu-a-967	18313	rs4073003	2.58725	1.9798	0.191273
1501	Computer use (excluded education SNPs)	Squamous cell lung cancer || id:ieu-a-967	fQCsJ0	ieu-a-967	18313	rs4977839	-0.438719	1.44755	0.761831
1502	Computer use (excluded education SNPs)	Squamous cell lung cancer || id:ieu-a-967	fQCsJ0	ieu-a-967	18313	rs55772938	1.31076	2.0258	0.51761
1503	Computer use (excluded education SNPs)	Squamous cell lung cancer || id:ieu-a-967	fQCsJ0	ieu-a-967	18313	rs6744254	-0.474321	1.71044	0.781542
1504	Computer use (excluded education SNPs)	Squamous cell lung cancer || id:ieu-a-967	fQCsJ0	ieu-a-967	18313	rs6774533	1.95691	1.89753	0.302405
1505	Computer use (excluded education SNPs)	Squamous cell lung cancer || id:ieu-a-967	fQCsJ0	ieu-a-967	18313	rs73578186	3.71227	1.7884	0.0379173
1506	Computer use (excluded education SNPs)	Squamous cell lung cancer || id:ieu-a-967	fQCsJ0	ieu-a-967	18313	rs9372625	0.732922	1.65122	0.657139
1507	Computer use (excluded education SNPs)	Squamous cell lung cancer || id:ieu-a-967	fQCsJ0	ieu-a-967	18313	rs984409	0.898893	2.05921	0.662458
1508	Computer use (excluded education SNPs)	Squamous cell lung cancer || id:ieu-a-967	fQCsJ0	ieu-a-967	18313	All - Inverse variance weighted	0.229633	0.417803	0.58258
1509	Computer use (excluded education SNPs)	Squamous cell lung cancer || id:ieu-a-967	fQCsJ0	ieu-a-967	18313	All - MR Egger	2.39375	3.40524	0.490606
1510	Computer use (MVMR adjusted for education)	Lung adenocarcinoma || id:ieu-a-965	rWtAcu	ieu-a-965	18336	rs10208088	0.24277	2.12	0.90883
1511	Computer use (MVMR adjusted for education)	Lung adenocarcinoma || id:ieu-a-965	rWtAcu	ieu-a-965	18336	rs113851275	3.91837	2.44781	0.109429
1512	Computer use (MVMR adjusted for education)	Lung adenocarcinoma || id:ieu-a-965	rWtAcu	ieu-a-965	18336	rs11708955	-3.66906	1.77038	0.0382213
1513	Computer use (MVMR adjusted for education)	Lung adenocarcinoma || id:ieu-a-965	rWtAcu	ieu-a-965	18336	rs11749912	-0.267787	1.95729	0.891177
1514	Computer use (MVMR adjusted for education)	Lung adenocarcinoma || id:ieu-a-965	rWtAcu	ieu-a-965	18336	rs13262595	-0.426107	1.73844	0.806372
1515	Computer use (MVMR adjusted for education)	Lung adenocarcinoma || id:ieu-a-965	rWtAcu	ieu-a-965	18336	rs1448355	-1.96975	1.973	0.318109
1516	Computer use (MVMR adjusted for education)	Lung adenocarcinoma || id:ieu-a-965	rWtAcu	ieu-a-965	18336	rs166835	0.0236118	2.11023	0.991073
1517	Computer use (MVMR adjusted for education)	Lung adenocarcinoma || id:ieu-a-965	rWtAcu	ieu-a-965	18336	rs2068625	1.25361	1.82981	0.493278
1518	Computer use (MVMR adjusted for education)	Lung adenocarcinoma || id:ieu-a-965	rWtAcu	ieu-a-965	18336	rs206965	1.48234	2.13338	0.487159
1519	Computer use (MVMR adjusted for education)	Lung adenocarcinoma || id:ieu-a-965	rWtAcu	ieu-a-965	18336	rs2345941	0.506385	1.8242	0.781325
1520	Computer use (MVMR adjusted for education)	Lung adenocarcinoma || id:ieu-a-965	rWtAcu	ieu-a-965	18336	rs2734849	-3.5846	2.04921	0.0802468
1521	Computer use (MVMR adjusted for education)	Lung adenocarcinoma || id:ieu-a-965	rWtAcu	ieu-a-965	18336	rs2748985	-0.310277	1.9608	0.874268
1522	Computer use (MVMR adjusted for education)	Lung adenocarcinoma || id:ieu-a-965	rWtAcu	ieu-a-965	18336	rs35933007	-1.48522	2.49987	0.552432
1523	Computer use (MVMR adjusted for education)	Lung adenocarcinoma || id:ieu-a-965	rWtAcu	ieu-a-965	18336	rs4073003	-0.92774	2.11425	0.660804
1524	Computer use (MVMR adjusted for education)	Lung adenocarcinoma || id:ieu-a-965	rWtAcu	ieu-a-965	18336	rs4977839	0.590995	1.4739	0.68844
1525	Computer use (MVMR adjusted for education)	Lung adenocarcinoma || id:ieu-a-965	rWtAcu	ieu-a-965	18336	rs55772938	-0.747713	1.97013	0.704299
1526	Computer use (MVMR adjusted for education)	Lung adenocarcinoma || id:ieu-a-965	rWtAcu	ieu-a-965	18336	rs6744254	2.20805	1.64187	0.178679
1527	Computer use (MVMR adjusted for education)	Lung adenocarcinoma || id:ieu-a-965	rWtAcu	ieu-a-965	18336	rs6774533	-2.53987	2.03893	0.21288
1528	Computer use (MVMR adjusted for education)	Lung adenocarcinoma || id:ieu-a-965	rWtAcu	ieu-a-965	18336	rs73578186	0.275435	1.8998	0.884726
1529	Computer use (MVMR adjusted for education)	Lung adenocarcinoma || id:ieu-a-965	rWtAcu	ieu-a-965	18336	rs9372625	1.18798	1.64833	0.471083
1530	Computer use (MVMR adjusted for education)	Lung adenocarcinoma || id:ieu-a-965	rWtAcu	ieu-a-965	18336	All - Inverse variance weighted	-0.164994	0.428068	0.699913
1531	Computer use (MVMR adjusted for education)	Lung adenocarcinoma || id:ieu-a-965	rWtAcu	ieu-a-965	18336	All - MR Egger	4.97403	3.56199	0.179572
1532	Computer use (MVMR adjusted for education)	Lung cancer || id:ieu-a-966	rWtAcu	ieu-a-966	27209	rs10208088	-0.0667982	1.38285	0.961473
1533	Computer use (MVMR adjusted for education)	Lung cancer || id:ieu-a-966	rWtAcu	ieu-a-966	27209	rs113851275	1.90042	1.51443	0.209523
1534	Computer use (MVMR adjusted for education)	Lung cancer || id:ieu-a-966	rWtAcu	ieu-a-966	27209	rs11708955	-3.70838	1.14775	0.0012336
1535	Computer use (MVMR adjusted for education)	Lung cancer || id:ieu-a-966	rWtAcu	ieu-a-966	27209	rs11749912	0.319499	1.28864	0.804185
1536	Computer use (MVMR adjusted for education)	Lung cancer || id:ieu-a-966	rWtAcu	ieu-a-966	27209	rs13262595	-1.60807	1.15075	0.162291
1537	Computer use (MVMR adjusted for education)	Lung cancer || id:ieu-a-966	rWtAcu	ieu-a-966	27209	rs1448355	-0.719107	1.26227	0.568885
1538	Computer use (MVMR adjusted for education)	Lung cancer || id:ieu-a-966	rWtAcu	ieu-a-966	27209	rs166835	-1.3594	1.35669	0.316346
1539	Computer use (MVMR adjusted for education)	Lung cancer || id:ieu-a-966	rWtAcu	ieu-a-966	27209	rs2068625	0.343191	1.21538	0.777657
1540	Computer use (MVMR adjusted for education)	Lung cancer || id:ieu-a-966	rWtAcu	ieu-a-966	27209	rs206965	-0.0614051	1.37431	0.964362
1541	Computer use (MVMR adjusted for education)	Lung cancer || id:ieu-a-966	rWtAcu	ieu-a-966	27209	rs2345941	0.274498	1.18887	0.8174
1542	Computer use (MVMR adjusted for education)	Lung cancer || id:ieu-a-966	rWtAcu	ieu-a-966	27209	rs2734849	-2.1318	1.30443	0.1022
1543	Computer use (MVMR adjusted for education)	Lung cancer || id:ieu-a-966	rWtAcu	ieu-a-966	27209	rs2748985	-0.0848793	1.26827	0.946641
1544	Computer use (MVMR adjusted for education)	Lung cancer || id:ieu-a-966	rWtAcu	ieu-a-966	27209	rs35933007	-1.02159	1.651	0.536069
1545	Computer use (MVMR adjusted for education)	Lung cancer || id:ieu-a-966	rWtAcu	ieu-a-966	27209	rs4073003	-0.0206458	1.35555	0.987848
1546	Computer use (MVMR adjusted for education)	Lung cancer || id:ieu-a-966	rWtAcu	ieu-a-966	27209	rs4977839	-0.275558	0.9432	0.77017
1547	Computer use (MVMR adjusted for education)	Lung cancer || id:ieu-a-966	rWtAcu	ieu-a-966	27209	rs55772938	0.799127	1.30993	0.541828
1548	Computer use (MVMR adjusted for education)	Lung cancer || id:ieu-a-966	rWtAcu	ieu-a-966	27209	rs6744254	0.800037	1.09706	0.465846
1549	Computer use (MVMR adjusted for education)	Lung cancer || id:ieu-a-966	rWtAcu	ieu-a-966	27209	rs6774533	-0.0777547	1.28427	0.951722
1550	Computer use (MVMR adjusted for education)	Lung cancer || id:ieu-a-966	rWtAcu	ieu-a-966	27209	rs73578186	1.68587	1.20907	0.163209
1551	Computer use (MVMR adjusted for education)	Lung cancer || id:ieu-a-966	rWtAcu	ieu-a-966	27209	rs9372625	1.35848	1.08022	0.20854
1552	Computer use (MVMR adjusted for education)	Lung cancer || id:ieu-a-966	rWtAcu	ieu-a-966	27209	All - Inverse variance weighted	-0.188174	0.302967	0.534531
1553	Computer use (MVMR adjusted for education)	Lung cancer || id:ieu-a-966	rWtAcu	ieu-a-966	27209	All - MR Egger	2.36034	2.48611	0.354986
1554	Computer use (MVMR adjusted for education)	Squamous cell lung cancer || id:ieu-a-967	rWtAcu	ieu-a-967	18313	rs10208088	3.02438	2.19985	0.169189
1555	Computer use (MVMR adjusted for education)	Squamous cell lung cancer || id:ieu-a-967	rWtAcu	ieu-a-967	18313	rs113851275	-0.426571	2.21614	0.847363
1556	Computer use (MVMR adjusted for education)	Squamous cell lung cancer || id:ieu-a-967	rWtAcu	ieu-a-967	18313	rs11708955	-3.32984	1.76806	0.0596562
1557	Computer use (MVMR adjusted for education)	Squamous cell lung cancer || id:ieu-a-967	rWtAcu	ieu-a-967	18313	rs11749912	-0.479031	1.95757	0.806683
1558	Computer use (MVMR adjusted for education)	Squamous cell lung cancer || id:ieu-a-967	rWtAcu	ieu-a-967	18313	rs13262595	-0.650419	1.74131	0.70876
1559	Computer use (MVMR adjusted for education)	Squamous cell lung cancer || id:ieu-a-967	rWtAcu	ieu-a-967	18313	rs1448355	0.70754	1.90727	0.710659
1560	Computer use (MVMR adjusted for education)	Squamous cell lung cancer || id:ieu-a-967	rWtAcu	ieu-a-967	18313	rs166835	-3.94418	2.00923	0.0496429
1561	Computer use (MVMR adjusted for education)	Squamous cell lung cancer || id:ieu-a-967	rWtAcu	ieu-a-967	18313	rs2068625	0.509131	1.85137	0.783315
1562	Computer use (MVMR adjusted for education)	Squamous cell lung cancer || id:ieu-a-967	rWtAcu	ieu-a-967	18313	rs206965	0.840325	2.14381	0.695075
1563	Computer use (MVMR adjusted for education)	Squamous cell lung cancer || id:ieu-a-967	rWtAcu	ieu-a-967	18313	rs2345941	1.12524	1.78993	0.529579
1564	Computer use (MVMR adjusted for education)	Squamous cell lung cancer || id:ieu-a-967	rWtAcu	ieu-a-967	18313	rs2734849	-3.69111	2.05093	0.0719041
1565	Computer use (MVMR adjusted for education)	Squamous cell lung cancer || id:ieu-a-967	rWtAcu	ieu-a-967	18313	rs2748985	0.0076004	1.9614	0.996908
1566	Computer use (MVMR adjusted for education)	Squamous cell lung cancer || id:ieu-a-967	rWtAcu	ieu-a-967	18313	rs35933007	-3.15342	2.46873	0.201481
1567	Computer use (MVMR adjusted for education)	Squamous cell lung cancer || id:ieu-a-967	rWtAcu	ieu-a-967	18313	rs4073003	2.58725	1.9798	0.191273
1568	Computer use (MVMR adjusted for education)	Squamous cell lung cancer || id:ieu-a-967	rWtAcu	ieu-a-967	18313	rs4977839	-0.438719	1.44755	0.761831
1569	Computer use (MVMR adjusted for education)	Squamous cell lung cancer || id:ieu-a-967	rWtAcu	ieu-a-967	18313	rs55772938	1.31076	2.0258	0.51761
1570	Computer use (MVMR adjusted for education)	Squamous cell lung cancer || id:ieu-a-967	rWtAcu	ieu-a-967	18313	rs6744254	-0.474321	1.71044	0.781542
1571	Computer use (MVMR adjusted for education)	Squamous cell lung cancer || id:ieu-a-967	rWtAcu	ieu-a-967	18313	rs6774533	1.95691	1.89753	0.302405
1572	Computer use (MVMR adjusted for education)	Squamous cell lung cancer || id:ieu-a-967	rWtAcu	ieu-a-967	18313	rs73578186	3.71227	1.7884	0.0379173
1573	Computer use (MVMR adjusted for education)	Squamous cell lung cancer || id:ieu-a-967	rWtAcu	ieu-a-967	18313	rs9372625	0.732922	1.65122	0.657139
1574	Computer use (MVMR adjusted for education)	Squamous cell lung cancer || id:ieu-a-967	rWtAcu	ieu-a-967	18313	All - Inverse variance weighted	0.0395399	0.46502	0.932239
1575	Computer use (MVMR adjusted for education)	Squamous cell lung cancer || id:ieu-a-967	rWtAcu	ieu-a-967	18313	All - MR Egger	2.23527	3.86647	0.570349
1576	Driving (overall)	Lung adenocarcinoma || id:ieu-a-965	62nLnq	ieu-a-965	18336	rs10186876	-0.97585	2.00093	0.625763
1577	Driving (overall)	Lung adenocarcinoma || id:ieu-a-965	62nLnq	ieu-a-965	18336	rs1198575	0.631616	1.86921	0.735435
1578	Driving (overall)	Lung adenocarcinoma || id:ieu-a-965	62nLnq	ieu-a-965	18336	rs4765541	0.77035	2.00743	0.701164
1579	Driving (overall)	Lung adenocarcinoma || id:ieu-a-965	62nLnq	ieu-a-965	18336	rs6012558	0.65658	1.99693	0.742311
1580	Driving (overall)	Lung adenocarcinoma || id:ieu-a-965	62nLnq	ieu-a-965	18336	All - Inverse variance weighted	0.282977	0.982994	0.773444
1581	Driving (overall)	Lung adenocarcinoma || id:ieu-a-965	62nLnq	ieu-a-965	18336	All - MR Egger	1.98098	7.8054	0.823361
1582	Driving (overall)	Lung cancer || id:ieu-a-966	62nLnq	ieu-a-966	27209	rs10186876	-1.61812	1.28864	0.209232
1583	Driving (overall)	Lung cancer || id:ieu-a-966	62nLnq	ieu-a-966	27209	rs1198575	-0.397073	1.19011	0.738647
1584	Driving (overall)	Lung cancer || id:ieu-a-966	62nLnq	ieu-a-966	27209	rs4765541	0.973171	1.31021	0.457629
1585	Driving (overall)	Lung cancer || id:ieu-a-966	62nLnq	ieu-a-966	27209	rs6012558	1.22269	1.29507	0.345112
1586	Driving (overall)	Lung cancer || id:ieu-a-966	62nLnq	ieu-a-966	27209	All - Inverse variance weighted	0.0165392	0.647743	0.979629
1587	Driving (overall)	Lung cancer || id:ieu-a-966	62nLnq	ieu-a-966	27209	All - MR Egger	-2.01431	6.06678	0.771439
1588	Driving (overall)	Squamous cell lung cancer || id:ieu-a-967	62nLnq	ieu-a-967	18313	rs10186876	-3.96633	1.91357	0.0381968
1589	Driving (overall)	Squamous cell lung cancer || id:ieu-a-967	62nLnq	ieu-a-967	18313	rs1198575	0.688737	1.85337	0.710181
1590	Driving (overall)	Squamous cell lung cancer || id:ieu-a-967	62nLnq	ieu-a-967	18313	rs4765541	0.597276	2.01857	0.767314
1591	Driving (overall)	Squamous cell lung cancer || id:ieu-a-967	62nLnq	ieu-a-967	18313	rs6012558	2.83889	1.93664	0.14268
1592	Driving (overall)	Squamous cell lung cancer || id:ieu-a-967	62nLnq	ieu-a-967	18313	All - Inverse variance weighted	0.019358	1.43732	0.989254
1593	Driving (overall)	Squamous cell lung cancer || id:ieu-a-967	62nLnq	ieu-a-967	18313	All - MR Egger	3.25796	13.9069	0.836574
1594	Driving (excluded pleiotropic SNPs)	Lung adenocarcinoma || id:ieu-a-965	WpcEti	ieu-a-965	18336	rs10186876	-0.97585	2.00093	0.625763
1595	Driving (excluded pleiotropic SNPs)	Lung adenocarcinoma || id:ieu-a-965	WpcEti	ieu-a-965	18336	rs6012558	0.65658	1.99693	0.742311
1596	Driving (excluded pleiotropic SNPs)	Lung adenocarcinoma || id:ieu-a-965	WpcEti	ieu-a-965	18336	All - Inverse variance weighted	-0.158002	1.41345	0.910995
1597	Driving (excluded pleiotropic SNPs)	Lung adenocarcinoma || id:ieu-a-965	WpcEti	ieu-a-965	18336	All - MR Egger	NA	NA	NA
1598	Driving (excluded pleiotropic SNPs)	Lung cancer || id:ieu-a-966	WpcEti	ieu-a-966	27209	rs10186876	-1.61812	1.28864	0.209232
1599	Driving (excluded pleiotropic SNPs)	Lung cancer || id:ieu-a-966	WpcEti	ieu-a-966	27209	rs6012558	1.22269	1.29507	0.345112
1600	Driving (excluded pleiotropic SNPs)	Lung cancer || id:ieu-a-966	WpcEti	ieu-a-966	27209	All - Inverse variance weighted	-0.204783	1.42039	0.885363
1601	Driving (excluded pleiotropic SNPs)	Lung cancer || id:ieu-a-966	WpcEti	ieu-a-966	27209	All - MR Egger	NA	NA	NA
1602	Driving (excluded pleiotropic SNPs)	Squamous cell lung cancer || id:ieu-a-967	WpcEti	ieu-a-967	18313	rs10186876	-3.96633	1.91357	0.0381968
1603	Driving (excluded pleiotropic SNPs)	Squamous cell lung cancer || id:ieu-a-967	WpcEti	ieu-a-967	18313	rs6012558	2.83889	1.93664	0.14268
1604	Driving (excluded pleiotropic SNPs)	Squamous cell lung cancer || id:ieu-a-967	WpcEti	ieu-a-967	18313	All - Inverse variance weighted	-0.604495	3.40237	0.858983
1605	Driving (excluded pleiotropic SNPs)	Squamous cell lung cancer || id:ieu-a-967	WpcEti	ieu-a-967	18313	All - MR Egger	NA	NA	NA
1606	Driving (excluded education SNPs)	Lung adenocarcinoma || id:ieu-a-965	By3Jgj	ieu-a-965	18336	rs10186876	-0.97585	2.00093	0.625763
1607	Driving (excluded education SNPs)	Lung adenocarcinoma || id:ieu-a-965	By3Jgj	ieu-a-965	18336	rs4765541	0.77035	2.00743	0.701164
1608	Driving (excluded education SNPs)	Lung adenocarcinoma || id:ieu-a-965	By3Jgj	ieu-a-965	18336	rs6012558	0.65658	1.99693	0.742311
1609	Driving (excluded education SNPs)	Lung adenocarcinoma || id:ieu-a-965	By3Jgj	ieu-a-965	18336	All - Inverse variance weighted	0.1497	1.15571	0.896938
1610	Driving (excluded education SNPs)	Lung adenocarcinoma || id:ieu-a-965	By3Jgj	ieu-a-965	18336	All - MR Egger	NA	NA	NA
1611	Driving (excluded education SNPs)	Lung cancer || id:ieu-a-966	By3Jgj	ieu-a-966	27209	rs10186876	-1.61812	1.28864	0.209232
1612	Driving (excluded education SNPs)	Lung cancer || id:ieu-a-966	By3Jgj	ieu-a-966	27209	rs4765541	0.973171	1.31021	0.457629
1613	Driving (excluded education SNPs)	Lung cancer || id:ieu-a-966	By3Jgj	ieu-a-966	27209	rs6012558	1.22269	1.29507	0.345112
1614	Driving (excluded education SNPs)	Lung cancer || id:ieu-a-966	By3Jgj	ieu-a-966	27209	All - Inverse variance weighted	0.180512	0.911869	0.843078
1615	Driving (excluded education SNPs)	Lung cancer || id:ieu-a-966	By3Jgj	ieu-a-966	27209	All - MR Egger	NA	NA	NA
1616	Driving (excluded education SNPs)	Squamous cell lung cancer || id:ieu-a-967	By3Jgj	ieu-a-967	18313	rs10186876	-3.96633	1.91357	0.0381968
1617	Driving (excluded education SNPs)	Squamous cell lung cancer || id:ieu-a-967	By3Jgj	ieu-a-967	18313	rs4765541	0.597276	2.01857	0.767314
1618	Driving (excluded education SNPs)	Squamous cell lung cancer || id:ieu-a-967	By3Jgj	ieu-a-967	18313	rs6012558	2.83889	1.93664	0.14268
1619	Driving (excluded education SNPs)	Squamous cell lung cancer || id:ieu-a-967	By3Jgj	ieu-a-967	18313	All - Inverse variance weighted	-0.228842	2.03322	0.910386
1620	Driving (excluded education SNPs)	Squamous cell lung cancer || id:ieu-a-967	By3Jgj	ieu-a-967	18313	All - MR Egger	NA	NA	NA
1621	Driving (MVMR adjusted for education)	Lung adenocarcinoma || id:ieu-a-965	brG71s	ieu-a-965	18336	rs10186876	-0.97585	2.00093	0.625763
1622	Driving (MVMR adjusted for education)	Lung adenocarcinoma || id:ieu-a-965	brG71s	ieu-a-965	18336	rs1198575	0.631616	1.86921	0.735435
1623	Driving (MVMR adjusted for education)	Lung adenocarcinoma || id:ieu-a-965	brG71s	ieu-a-965	18336	rs6012558	0.65658	1.99693	0.742311
1624	Driving (MVMR adjusted for education)	Lung adenocarcinoma || id:ieu-a-965	brG71s	ieu-a-965	18336	All - Inverse variance weighted	0.129252	1.12741	0.908727
1625	Driving (MVMR adjusted for education)	Lung adenocarcinoma || id:ieu-a-965	brG71s	ieu-a-965	18336	All - MR Egger	2.84254	8.13116	0.785901
1626	Driving (MVMR adjusted for education)	Lung cancer || id:ieu-a-966	brG71s	ieu-a-966	27209	rs10186876	-1.61812	1.28864	0.209232
1627	Driving (MVMR adjusted for education)	Lung cancer || id:ieu-a-966	brG71s	ieu-a-966	27209	rs1198575	-0.397073	1.19011	0.738647
1628	Driving (MVMR adjusted for education)	Lung cancer || id:ieu-a-966	brG71s	ieu-a-966	27209	rs6012558	1.22269	1.29507	0.345112
1629	Driving (MVMR adjusted for education)	Lung cancer || id:ieu-a-966	brG71s	ieu-a-966	27209	All - Inverse variance weighted	-0.27607	0.799432	0.729844
1630	Driving (MVMR adjusted for education)	Lung cancer || id:ieu-a-966	brG71s	ieu-a-966	27209	All - MR Egger	-0.935487	8.07878	0.926609
1631	Driving (MVMR adjusted for education)	Squamous cell lung cancer || id:ieu-a-967	brG71s	ieu-a-967	18313	rs10186876	-3.96633	1.91357	0.0381968
1632	Driving (MVMR adjusted for education)	Squamous cell lung cancer || id:ieu-a-967	brG71s	ieu-a-967	18313	rs1198575	0.688737	1.85337	0.710181
1633	Driving (MVMR adjusted for education)	Squamous cell lung cancer || id:ieu-a-967	brG71s	ieu-a-967	18313	rs6012558	2.83889	1.93664	0.14268
1634	Driving (MVMR adjusted for education)	Squamous cell lung cancer || id:ieu-a-967	brG71s	ieu-a-967	18313	All - Inverse variance weighted	-0.151352	1.98753	0.939299
1635	Driving (MVMR adjusted for education)	Squamous cell lung cancer || id:ieu-a-967	brG71s	ieu-a-967	18313	All - MR Egger	4.30979	20.0164	0.864989
SNP: single nucleotide polymorphism, b: beta, se: standard error, p: p-value.

## Sheet: Supplementary table 5
Supplementary table 5. MR-heterogeneity test on detecting horizontal pleiotropy.
	id.exposure	id.outcome	outcome	exposure	method	Q	Q_df	Q_pval	I2 Index
1	HTIJzT	ieu-a-965	Lung adenocarcinoma || id:ieu-a-965	Television watching (overall)	MR Egger	88.3722	96	0.697534	0
2	HTIJzT	ieu-a-965	Lung adenocarcinoma || id:ieu-a-965	Television watching (overall)	Inverse variance weighted	88.4437	97	0.720764	0
3	HTIJzT	ieu-a-966	Lung cancer || id:ieu-a-966	Television watching (overall)	MR Egger	121.754	96	0.0390742	0.211523
4	HTIJzT	ieu-a-966	Lung cancer || id:ieu-a-966	Television watching (overall)	Inverse variance weighted	121.761	97	0.0452679	0.203357
5	HTIJzT	ieu-a-967	Squamous cell lung cancer || id:ieu-a-967	Television watching (overall)	MR Egger	108.411	96	0.182094	0.114483
6	HTIJzT	ieu-a-967	Squamous cell lung cancer || id:ieu-a-967	Television watching (overall)	Inverse variance weighted	108.88	97	0.192749	0.109109
7	ezQkco	ieu-a-965	Lung adenocarcinoma || id:ieu-a-965	Television watching (excluded pleiotropic SNPs)	MR Egger	60.0902	65	0.649167	0
8	ezQkco	ieu-a-965	Lung adenocarcinoma || id:ieu-a-965	Television watching (excluded pleiotropic SNPs)	Inverse variance weighted	60.0937	66	0.68145	0
9	ezQkco	ieu-a-966	Lung cancer || id:ieu-a-966	Television watching (excluded pleiotropic SNPs)	MR Egger	84.4598	65	0.0528006	0.230403
10	ezQkco	ieu-a-966	Lung cancer || id:ieu-a-966	Television watching (excluded pleiotropic SNPs)	Inverse variance weighted	84.626	66	0.0609873	0.220098
11	ezQkco	ieu-a-967	Squamous cell lung cancer || id:ieu-a-967	Television watching (excluded pleiotropic SNPs)	MR Egger	83.7593	65	0.0586162	0.223967
12	ezQkco	ieu-a-967	Squamous cell lung cancer || id:ieu-a-967	Television watching (excluded pleiotropic SNPs)	Inverse variance weighted	83.9948	66	0.0668287	0.214237
13	h8Mp56	ieu-a-965	Lung adenocarcinoma || id:ieu-a-965	Television watching (excluded education SNPs)	MR Egger	73.5189	84	0.786091	0
14	h8Mp56	ieu-a-965	Lung adenocarcinoma || id:ieu-a-965	Television watching (excluded education SNPs)	Inverse variance weighted	73.6479	85	0.805382	0
15	h8Mp56	ieu-a-966	Lung cancer || id:ieu-a-966	Television watching (excluded education SNPs)	MR Egger	109.207	84	0.0337186	0.230816
16	h8Mp56	ieu-a-966	Lung cancer || id:ieu-a-966	Television watching (excluded education SNPs)	Inverse variance weighted	109.241	85	0.0394489	0.221905
17	h8Mp56	ieu-a-967	Squamous cell lung cancer || id:ieu-a-967	Television watching (excluded education SNPs)	MR Egger	95.74	84	0.179415	0.122624
18	h8Mp56	ieu-a-967	Squamous cell lung cancer || id:ieu-a-967	Television watching (excluded education SNPs)	Inverse variance weighted	95.9858	85	0.195056	0.114452
19	dPzbCf	ieu-a-965	Lung adenocarcinoma || id:ieu-a-965	Television watching (MVMR adjusted for BMI)	MR Egger	74.3818	76	0.531082	0
20	dPzbCf	ieu-a-965	Lung adenocarcinoma || id:ieu-a-965	Television watching (MVMR adjusted for BMI)	Inverse variance weighted	74.3888	77	0.563139	0
21	dPzbCf	ieu-a-966	Lung cancer || id:ieu-a-966	Television watching (MVMR adjusted for BMI)	MR Egger	97.4638	76	0.0492042	0.220224
22	dPzbCf	ieu-a-966	Lung cancer || id:ieu-a-966	Television watching (MVMR adjusted for BMI)	Inverse variance weighted	97.4729	77	0.0575844	0.210037
23	dPzbCf	ieu-a-967	Squamous cell lung cancer || id:ieu-a-967	Television watching (MVMR adjusted for BMI)	MR Egger	96.2102	76	0.0586716	0.210063
24	dPzbCf	ieu-a-967	Squamous cell lung cancer || id:ieu-a-967	Television watching (MVMR adjusted for BMI)	Inverse variance weighted	96.6878	77	0.0641141	0.203622
25	rWtAcu	ieu-a-965	Lung adenocarcinoma || id:ieu-a-965	Television watching (MVMR adjusted for education)	MR Egger	87.614	94	0.665604	0
26	rWtAcu	ieu-a-965	Lung adenocarcinoma || id:ieu-a-965	Television watching (MVMR adjusted for education)	Inverse variance weighted	87.7017	95	0.689688	0
27	rWtAcu	ieu-a-966	Lung cancer || id:ieu-a-966	Television watching (MVMR adjusted for education)	MR Egger	121.548	94	0.0294889	0.22664
28	rWtAcu	ieu-a-966	Lung cancer || id:ieu-a-966	Television watching (MVMR adjusted for education)	Inverse variance weighted	121.56	95	0.0344406	0.21849
29	rWtAcu	ieu-a-967	Squamous cell lung cancer || id:ieu-a-967	Television watching (MVMR adjusted for education)	MR Egger	107.713	94	0.157843	0.127314
30	rWtAcu	ieu-a-967	Squamous cell lung cancer || id:ieu-a-967	Television watching (MVMR adjusted for education)	Inverse variance weighted	108.252	95	0.166555	0.122418
31	ke4oc1	ieu-a-965	Lung adenocarcinoma || id:ieu-a-965	Computer use (overall)	MR Egger	15.1817	20	0.76592	0
32	ke4oc1	ieu-a-965	Lung adenocarcinoma || id:ieu-a-965	Computer use (overall)	Inverse variance weighted	17.0127	21	0.710335	0
33	ke4oc1	ieu-a-966	Lung cancer || id:ieu-a-966	Computer use (overall)	MR Egger	21.5422	20	0.365862	0.0715879
34	ke4oc1	ieu-a-966	Lung cancer || id:ieu-a-966	Computer use (overall)	Inverse variance weighted	22.7785	21	0.355902	0.0780776
35	ke4oc1	ieu-a-967	Squamous cell lung cancer || id:ieu-a-967	Computer use (overall)	MR Egger	23.0353	20	0.287066	0.131766
36	ke4oc1	ieu-a-967	Squamous cell lung cancer || id:ieu-a-967	Computer use (overall)	Inverse variance weighted	23.3633	21	0.324917	0.101155
37	1vmbuo	ieu-a-965	Lung adenocarcinoma || id:ieu-a-965	Computer use (excluded pleiotropic SNPs)	MR Egger	9.57317	17	0.920549	0
38	1vmbuo	ieu-a-965	Lung adenocarcinoma || id:ieu-a-965	Computer use (excluded pleiotropic SNPs)	Inverse variance weighted	11.4612	18	0.87377	0
39	1vmbuo	ieu-a-966	Lung cancer || id:ieu-a-966	Computer use (excluded pleiotropic SNPs)	MR Egger	8.88336	17	0.94385	0
40	1vmbuo	ieu-a-966	Lung cancer || id:ieu-a-966	Computer use (excluded pleiotropic SNPs)	Inverse variance weighted	10.4347	18	0.916789	0
41	1vmbuo	ieu-a-967	Squamous cell lung cancer || id:ieu-a-967	Computer use (excluded pleiotropic SNPs)	MR Egger	18.7343	17	0.343992	0.0925752
42	1vmbuo	ieu-a-967	Squamous cell lung cancer || id:ieu-a-967	Computer use (excluded pleiotropic SNPs)	Inverse variance weighted	19.2016	18	0.379512	0.0625759
43	fQCsJ0	ieu-a-965	Lung adenocarcinoma || id:ieu-a-965	Computer use (excluded education SNPs)	MR Egger	10.6716	19	0.934392	0
44	fQCsJ0	ieu-a-965	Lung adenocarcinoma || id:ieu-a-965	Computer use (excluded education SNPs)	Inverse variance weighted	12.7416	20	0.888194	0
45	fQCsJ0	ieu-a-966	Lung cancer || id:ieu-a-966	Computer use (excluded education SNPs)	MR Egger	11.4053	19	0.909453	0
46	fQCsJ0	ieu-a-966	Lung cancer || id:ieu-a-966	Computer use (excluded education SNPs)	Inverse variance weighted	12.9283	20	0.88044	0
47	fQCsJ0	ieu-a-967	Squamous cell lung cancer || id:ieu-a-967	Computer use (excluded education SNPs)	MR Egger	19.1122	19	0.449662	0.00586897
48	fQCsJ0	ieu-a-967	Squamous cell lung cancer || id:ieu-a-967	Computer use (excluded education SNPs)	Inverse variance weighted	19.5247	20	0.487993	0
49	rWtAcu	ieu-a-965	Lung adenocarcinoma || id:ieu-a-965	Computer use (MVMR adjusted for education)	MR Egger	14.551	18	0.692528	0
50	rWtAcu	ieu-a-965	Lung adenocarcinoma || id:ieu-a-965	Computer use (MVMR adjusted for education)	Inverse variance weighted	16.663	19	0.612684	0
51	rWtAcu	ieu-a-966	Lung cancer || id:ieu-a-966	Computer use (MVMR adjusted for education)	MR Egger	21.3473	18	0.262253	0.156804
52	rWtAcu	ieu-a-966	Lung cancer || id:ieu-a-966	Computer use (MVMR adjusted for education)	Inverse variance weighted	22.6123	19	0.25485	0.159749
53	rWtAcu	ieu-a-967	Squamous cell lung cancer || id:ieu-a-967	Computer use (MVMR adjusted for education)	MR Egger	22.6043	18	0.206258	0.20369
54	rWtAcu	ieu-a-967	Squamous cell lung cancer || id:ieu-a-967	Computer use (MVMR adjusted for education)	Inverse variance weighted	23.0154	19	0.236663	0.174467
55	62nLnq	ieu-a-965	Lung adenocarcinoma || id:ieu-a-965	Driving (overall)	MR Egger	0.476442	2	0.788029	0
56	62nLnq	ieu-a-965	Lung adenocarcinoma || id:ieu-a-965	Driving (overall)	Inverse variance weighted	0.524529	3	0.91347	0
57	62nLnq	ieu-a-966	Lung cancer || id:ieu-a-966	Driving (overall)	MR Egger	2.96173	2	0.22744	0.32472
58	62nLnq	ieu-a-966	Lung cancer || id:ieu-a-966	Driving (overall)	Inverse variance weighted	3.1304	3	0.371953	0.0416575
59	62nLnq	ieu-a-967	Squamous cell lung cancer || id:ieu-a-967	Driving (overall)	MR Egger	6.49148	2	0.0389397	0.691904
60	62nLnq	ieu-a-967	Squamous cell lung cancer || id:ieu-a-967	Driving (overall)	Inverse variance weighted	6.67029	3	0.0831831	0.550245
61	WpcEti	ieu-a-965	Lung adenocarcinoma || id:ieu-a-965	Driving (excluded pleiotropic SNPs)	Inverse variance weighted	0.33346	1	0.563629	0
62	WpcEti	ieu-a-966	Lung cancer || id:ieu-a-966	Driving (excluded pleiotropic SNPs)	Inverse variance weighted	2.41782	1	0.119962	0.586404
63	WpcEti	ieu-a-967	Squamous cell lung cancer || id:ieu-a-967	Driving (excluded pleiotropic SNPs)	Inverse variance weighted	6.24783	1	0.0124346	0.839944
64	By3Jgj	ieu-a-965	Lung adenocarcinoma || id:ieu-a-965	Driving (excluded education SNPs)	Inverse variance weighted	0.476442	2	0.788029	0
65	By3Jgj	ieu-a-966	Lung cancer || id:ieu-a-966	Driving (excluded education SNPs)	Inverse variance weighted	2.96173	2	0.22744	0.32472
66	By3Jgj	ieu-a-967	Squamous cell lung cancer || id:ieu-a-967	Driving (excluded education SNPs)	Inverse variance weighted	6.49148	2	0.0389397	0.691904
67	brG71s	ieu-a-965	Lung adenocarcinoma || id:ieu-a-965	Driving (MVMR adjusted for education)	MR Egger	0.33346	1	0.563629	0
68	brG71s	ieu-a-965	Lung adenocarcinoma || id:ieu-a-965	Driving (MVMR adjusted for education)	Inverse variance weighted	0.446992	2	0.799718	0
69	brG71s	ieu-a-966	Lung cancer || id:ieu-a-966	Driving (MVMR adjusted for education)	MR Egger	2.41782	1	0.119962	0.586404
70	brG71s	ieu-a-966	Lung cancer || id:ieu-a-966	Driving (MVMR adjusted for education)	Inverse variance weighted	2.43425	2	0.29608	0.178391
71	brG71s	ieu-a-967	Squamous cell lung cancer || id:ieu-a-967	Driving (MVMR adjusted for education)	MR Egger	6.24783	1	0.0124346	0.839944
72	brG71s	ieu-a-967	Squamous cell lung cancer || id:ieu-a-967	Driving (MVMR adjusted for education)	Inverse variance weighted	6.56411	2	0.0375509	0.695313
df: degrees of freedom, pval: p-value.

## Sheet: Supplementary table 6
Supplementary table 6. MR-Egger regression analyses on detecting directional pleiotropy.
	id.exposure	id.outcome	outcome	exposure	egger_intercept	se	pval
1	HTIJzT	ieu-a-965	Lung adenocarcinoma || id:ieu-a-965	Television watching (overall)	-0.00399203	0.0149322	0.789779
2	HTIJzT	ieu-a-966	Lung cancer || id:ieu-a-966	Television watching (overall)	0.000818486	0.01094	0.940517
3	HTIJzT	ieu-a-967	Squamous cell lung cancer || id:ieu-a-967	Television watching (overall)	0.010153	0.0157612	0.520996
4	ezQkco	ieu-a-965	Lung adenocarcinoma || id:ieu-a-965	Television watching (excluded pleiotropic SNPs)	0.00106014	0.0181043	0.953484
5	ezQkco	ieu-a-966	Lung cancer || id:ieu-a-966	Television watching (excluded pleiotropic SNPs)	0.00477974	0.0133632	0.721742
6	ezQkco	ieu-a-967	Squamous cell lung cancer || id:ieu-a-967	Television watching (excluded pleiotropic SNPs)	0.00870614	0.0203648	0.670422
7	h8Mp56	ieu-a-965	Lung adenocarcinoma || id:ieu-a-965	Television watching (excluded education SNPs)	-0.0058467	0.016277	0.720345
8	h8Mp56	ieu-a-966	Lung cancer || id:ieu-a-966	Television watching (excluded education SNPs)	0.00196769	0.0120645	0.870833
9	h8Mp56	ieu-a-967	Squamous cell lung cancer || id:ieu-a-967	Television watching (excluded education SNPs)	0.00801744	0.0172668	0.643615
10	dPzbCf	ieu-a-965	Lung adenocarcinoma || id:ieu-a-965	Television watching (MVMR adjusted for BMI)	0.00134806	0.0160782	0.933401
11	dPzbCf	ieu-a-966	Lung cancer || id:ieu-a-966	Television watching (MVMR adjusted for BMI)	0.000996449	0.0118479	0.933195
12	dPzbCf	ieu-a-967	Squamous cell lung cancer || id:ieu-a-967	Television watching (MVMR adjusted for BMI)	0.0110359	0.0179673	0.540903
13	rWtAcu	ieu-a-965	Lung adenocarcinoma || id:ieu-a-965	Television watching (MVMR adjusted for education)	-0.00443734	0.0149819	0.767746
14	rWtAcu	ieu-a-966	Lung cancer || id:ieu-a-966	Television watching (MVMR adjusted for education)	0.00106351	0.0110836	0.923761
15	rWtAcu	ieu-a-967	Squamous cell lung cancer || id:ieu-a-967	Television watching (MVMR adjusted for education)	0.0109202	0.0159287	0.494673
16	ke4oc1	ieu-a-965	Lung adenocarcinoma || id:ieu-a-965	Computer use (overall)	-0.0736303	0.0544134	0.191102
17	ke4oc1	ieu-a-966	Lung cancer || id:ieu-a-966	Computer use (overall)	-0.0388188	0.036233	0.296763
18	ke4oc1	ieu-a-967	Squamous cell lung cancer || id:ieu-a-967	Computer use (overall)	-0.0302713	0.0567207	0.599437
19	1vmbuo	ieu-a-965	Lung adenocarcinoma || id:ieu-a-965	Computer use (excluded pleiotropic SNPs)	-0.0751254	0.0546738	0.187269
20	1vmbuo	ieu-a-966	Lung cancer || id:ieu-a-966	Computer use (excluded pleiotropic SNPs)	-0.0436899	0.035077	0.229828
21	1vmbuo	ieu-a-967	Squamous cell lung cancer || id:ieu-a-967	Computer use (excluded pleiotropic SNPs)	-0.0362969	0.0557448	0.523669
22	fQCsJ0	ieu-a-965	Lung adenocarcinoma || id:ieu-a-965	Computer use (excluded education SNPs)	-0.0783526	0.0544588	0.166492
23	fQCsJ0	ieu-a-966	Lung cancer || id:ieu-a-966	Computer use (excluded education SNPs)	-0.0431173	0.0349381	0.232211
24	fQCsJ0	ieu-a-967	Squamous cell lung cancer || id:ieu-a-967	Computer use (excluded education SNPs)	-0.0339668	0.0530406	0.529567
25	rWtAcu	ieu-a-965	Lung adenocarcinoma || id:ieu-a-965	Computer use (MVMR adjusted for education)	-0.0811259	0.055823	0.163361
26	rWtAcu	ieu-a-966	Lung cancer || id:ieu-a-966	Computer use (MVMR adjusted for education)	-0.0402695	0.0389918	0.315389
27	rWtAcu	ieu-a-967	Squamous cell lung cancer || id:ieu-a-967	Computer use (MVMR adjusted for education)	-0.0347385	0.0607109	0.574267
28	62nLnq	ieu-a-965	Lung adenocarcinoma || id:ieu-a-965	Driving (overall)	-0.0256379	0.116914	0.846771
29	62nLnq	ieu-a-966	Lung cancer || id:ieu-a-966	Driving (overall)	0.0307275	0.0910471	0.767876
30	62nLnq	ieu-a-967	Squamous cell lung cancer || id:ieu-a-967	Driving (overall)	-0.0488152	0.207977	0.836272
31	WpcEti	ieu-a-965	Lung adenocarcinoma || id:ieu-a-965	Driving (excluded pleiotropic SNPs)	NA	NA	NA
32	WpcEti	ieu-a-966	Lung cancer || id:ieu-a-966	Driving (excluded pleiotropic SNPs)	NA	NA	NA
33	WpcEti	ieu-a-967	Squamous cell lung cancer || id:ieu-a-967	Driving (excluded pleiotropic SNPs)	NA	NA	NA
34	By3Jgj	ieu-a-965	Lung adenocarcinoma || id:ieu-a-965	Driving (excluded education SNPs)	NA	NA	NA
35	By3Jgj	ieu-a-966	Lung cancer || id:ieu-a-966	Driving (excluded education SNPs)	NA	NA	NA
36	By3Jgj	ieu-a-967	Squamous cell lung cancer || id:ieu-a-967	Driving (excluded education SNPs)	NA	NA	NA
37	brG71s	ieu-a-965	Lung adenocarcinoma || id:ieu-a-965	Driving (MVMR adjusted for education)	-0.0420077	0.124672	0.7931
38	brG71s	ieu-a-966	Lung cancer || id:ieu-a-966	Driving (MVMR adjusted for education)	0.0102299	0.124105	0.947643
39	brG71s	ieu-a-967	Squamous cell lung cancer || id:ieu-a-967	Driving (MVMR adjusted for education)	-0.0687999	0.305783	0.859109
se: standard error, pval: p-value.
